# Supplementary material for: Validation of intraosseous delivery of valproic acid in a swine model of polytrauma
Source: HighWire-hosted journal article supplement (doi:10.1136/tsaco-2021-000683), 2021-03-01
Supplement: tsaco-2021-000683supp001_data_supplement.pdf [file tsaco-2021-000683supp001_data_supplement.pdf]

|                             |         | Baseline    | Shock       | Treatment   | pRBC        | End         |
|-----------------------------|---------|-------------|-------------|-------------|-------------|-------------|
| <b>pH</b>                   | Control | 7.46 (0.04) | 7.41 (0.08) | 7.32 (0.03) | 7.37        |             |
|                             | IV      | 7.41 (0.06) | 7.46 (0.02) | 7.30 (0.18) | 7.39 (0.05) | 7.44 (0.07) |
|                             | IO      | 7.46 (0.06) | 7.48 (0.03) | 7.37 (0.04) | 7.39 (0.05) | 7.41 (0.05) |
| <b>Hgb (g/dL)</b>           | Control | 9.8 (0.9)   | 10.3 (0.8)  | 10.4 (0.8)  | 6.8         |             |
|                             | IV      | 9.3 (0.9)   | 11.4 (1.0)  | 9.9 (1.9)   | 8.7 (0.9)   | 13.3 (0.9)  |
|                             | IO      | 10.2 (1.0)  | 10.7 (2.5)  | 10.0 (0.8)  | 9.0 (1.5)   | 14.3 (1.4)  |
| <b>K (mM)</b>               | Control | 3.7 (0.1)   | 4.7 (1.3)   | 4.6 (1.7)   | 5.2         |             |
|                             | IV      | 3.9 (0.2)   | 4.6 (0.5)   | 4.6 (0.4)   | 5.1 (0.7)   | 5.2 (0.1)   |
|                             | IO      | 3.8 (0.2)   | 4.3 (0.1)   | 4.3 (0.2)   | 4.9 (0.1)   | 4.6 (1.4)   |
| <b>Na (mM)</b>              | Control | 138 (0.6)   | 138 (2.1)   | 137 (2.6)   | 137         |             |
|                             | IV      | 139 (1.0)   | 135 (3.2)   | 138 (4.6)   | 140 (1.7)   | 139 (1.0)   |
|                             | IO      | 142 (1.2)   | 139 (0.6)   | 140 (1.7)   | 143 (1.2)   | 143 (1.2)   |
| <b>HCO<sub>3</sub> (mM)</b> | Control | 26.4 (1.5)  | 18.5 (5.9)  | 13.7 (1.8)  | 15.2        |             |
|                             | IV      | 27.2 (1.8)  | 22.2 (2.0)  | 17.5 (3.2)  | 18.7 (4.0)  | 22.9 (1.0)  |
|                             | IO      | 27.5 (2.0)  | 27.4 (0.6)  | 22.9 (2.6)  | 22.4 (2.1)  | 24.3 (2.6)  |
| <b>Lactate (mmol/L)</b>     | Control | 2.0 (0.3)   | 5.5 (1.9)   | 11.5 (2.1)  | 7.8         |             |
|                             | IV      | 1.5 (0.5)   | 3.6 (1.9)   | 9.1 (1.2)   | 8.0 (2.7)   | 4.1 (1.6)   |
|                             | IO      | 1.6 (0.9)   | 2.8 (0.2)   | 8.1 (1.5)   | 6.0 (2.7)   | 3.5 (0.8)   |

**Table S1:** Arterial blood gas data. Data presented as group means with standard deviation shown in parentheses. Hgb = hemoglobin; K = potassium; Na = sodium; HCO<sub>3</sub> = bicarbonate; Shock = end of hemorrhage/start of shock; Treatment = end of shock/start of normal saline resuscitation ± VPA treatment; pRBC = start of blood transfusion; End = end of experiment; Control = control group; IV = VPA IV treatment group; IO = VPA IO treatment group.
