# Supplementary material for: Validation of intraosseous delivery of valproic acid in a swine model of polytrauma
Source: HighWire-hosted journal article supplement (doi:10.1136/tsaco-2021-000683), 2021-03-01
Supplement: tsaco-2021-000683supp002_data_supplement.xlsx [file tsaco-2021-000683supp002_data_supplement.xlsx]

## Sheet: ALAM_MS1211_heart VPA vs heart 
Identified Proteins (4480)	Accession Number	Accession number human	Molecular Weight	T-Test (p-value): (p < 0.05)	Fold Change by Category
NADH dehydrogenase ubiquinone 1 beta subcomplex subunit 7 OS=Sus scrofa OX=9823 GN=NDUFB7 PE=1 SV=3	tr|F1SCH1|F1SCH1_PIG	P17568	16 kDa	0.00017	5
Translocase of inner mitochondrial membrane 10 OS=Sus scrofa OX=9823 GN=TIMM10 PE=4 SV=1	tr|A0A286ZVD0|A0A286ZVD0_PIG	P62072	10 kDa	0.0012	8.8
CRK proto-oncogene, adaptor protein OS=Sus scrofa OX=9823 GN=CRK PE=1 SV=1	tr|A0A287A2R9|A0A287A2R9_PIG	P46108	29 kDa	0.0018	1.7
Synaptosomal-associated protein OS=Sus scrofa OX=9823 GN=SNAP23 PE=1 SV=1	tr|A0A287AHK8|A0A287AHK8_PIG (+1)	O00161	25 kDa	0.002	3.4
Carbonic anhydrase OS=Sus scrofa OX=9823 GN=CA1 PE=1 SV=1	tr|A0A287AI92|A0A287AI92_PIG	P00915	29 kDa	0.0025	3.5
Tubulin beta chain OS=Sus scrofa OX=9823 GN=TUBB2B PE=1 SV=1	tr|A0A287B5H7|A0A287B5H7_PIG	Q9BVA1	50 kDa	0.0032	2.7
Fibrillar collagen NC1 domain-containing protein OS=Sus scrofa OX=9823 GN=COL5A1 PE=1 SV=4	tr|F1S021|F1S021_PIG	P20908	192 kDa	0.0037	6.2
Uncharacterized protein OS=Sus scrofa OX=9823 GN=AHNAK PE=1 SV=2	tr|A0A287A4Q2|A0A287A4Q2_PIG		136 kDa	0.0052	7.3
Calcium voltage-gated channel auxiliary subunit alpha2delta 1 OS=Sus scrofa OX=9823 GN=CACNA2D1 PE=1 SV=2	tr|A0A286ZV56|A0A286ZV56_PIG (+2)	P54289	120 kDa	0.0059	0.6
Chromosome 2 open reading frame 88 OS=Sus scrofa OX=9823 GN=C15H2orf88 PE=1 SV=1	tr|A0A287ABE0|A0A287ABE0_PIG	Not present in human	11 kDa	0.0059	6.7
Heme oxygenase OS=Sus scrofa OX=9823 GN=HMOX2 PE=1 SV=1	tr|A0A287B1I6|A0A287B1I6_PIG (+2)	P30519	36 kDa	0.0059	INF
SET and MYND domain-containing protein 5 isoform X1 OS=Sus scrofa OX=9823 GN=SMYD5 PE=1 SV=1	tr|A0A480ETD9|A0A480ETD9_PIG	Q6GMV2	66 kDa	0.0074	INF
Chaperonin containing TCP1 subunit 8 OS=Sus scrofa OX=9823 GN=CCT8 PE=1 SV=2	tr|I3LCA2|I3LCA2_PIG	P50990	60 kDa	0.0077	2
Protein S100-A10 OS=Sus scrofa OX=9823 GN=S100A10 PE=1 SV=2	sp|P04163|S10AA_PIG (+1)	P60903	11 kDa	0.0081	INF
DnaJ heat shock protein family (Hsp40) member B2 OS=Sus scrofa OX=9823 GN=DNAJB2 PE=4 SV=2	tr|A0A287A4R7|A0A287A4R7_PIG (+1)	P25686	33 kDa	0.0088	0.3
Uncharacterized protein OS=Sus scrofa OX=9823 GN=SIRPA PE=1 SV=3	tr|K7GP73|K7GP73_PIG		54 kDa	0.01	0.1
Acyl-CoA thioesterase 13 OS=Sus scrofa OX=9823 GN=ACOT13 PE=4 SV=2	tr|F1RUE0|F1RUE0_PIG	Q9NPJ3	15 kDa	0.011	2.1
Calcium regulated heat stable protein 1 OS=Sus scrofa OX=9823 GN=CARHSP1 PE=4 SV=2	tr|I3LCU9|I3LCU9_PIG	Q9Y2V2	16 kDa	0.011	4.5
UDP-glucose glycoprotein glucosyltransferase 1 OS=Sus scrofa OX=9823 GN=UGGT1 PE=1 SV=1	tr|A0A5G2RD08|A0A5G2RD08_PIG (+1)	Q9NYU2	179 kDa	0.012	INF
Proteasome 26S subunit, non-ATPase 11 OS=Sus scrofa OX=9823 GN=PSMD11 PE=1 SV=3	tr|F1RKW8|F1RKW8_PIG	O00231	47 kDa	0.014	7.7
Ubiquitin conjugating enzyme E2 N like (gene/pseudogene) OS=Sus scrofa OX=9823 GN=UBE2NL PE=1 SV=1	tr|A0A5G2RGI4|A0A5G2RGI4_PIG	Q5JXB2	17 kDa	0.015	2.2
Uncharacterized protein OS=Sus scrofa OX=9823 GN=TPM2 PE=1 SV=2	tr|A0A287AD38|A0A287AD38_PIG		40 kDa	0.016	2
Rab GDP dissociation inhibitor OS=Sus scrofa OX=9823 GN=GDI1 PE=3 SV=2	tr|I3L893|I3L893_PIG	P31150	48 kDa	0.016	2
Purine rich element binding protein B OS=Sus scrofa OX=9823 GN=PURB PE=1 SV=1	tr|A0A287A4H2|A0A287A4H2_PIG	Q96QR8	33 kDa	0.017	8.7
Citrate synthase, mitochondrial OS=Sus scrofa OX=9823 GN=CS PE=1 SV=2	sp|P00889|CISY_PIG	O75390	52 kDa	0.019	1.9
Coiled-coil domain containing 58 OS=Sus scrofa OX=9823 GN=CCDC58 PE=1 SV=1	tr|A0A5G2QWQ4|A0A5G2QWQ4_PIG	Q4VC31	15 kDa	0.021	4.4
Family with sequence similarity 162 member A OS=Sus scrofa OX=9823 GN=FAM162A PE=1 SV=1	tr|I3LKD2|I3LKD2_PIG	Q96A26	18 kDa	0.021	3.8
NIMA related kinase 7 OS=Sus scrofa OX=9823 GN=NEK7 PE=3 SV=2	tr|A0A287BE42|A0A287BE42_PIG	Q8TDX7	37 kDa	0.022	3
Pseudouridine-5'-phosphatase isoform b OS=Sus scrofa OX=9823 GN=PUDP PE=1 SV=3	tr|I3LS97|I3LS97_PIG	Q08623	25 kDa	0.024	4.1
Carbonic anhydrase OS=Sus scrofa OX=9823 GN=CA2 PE=1 SV=2	tr|F1RXC2|F1RXC2_PIG	P00918	29 kDa	0.025	2.7
Chromosome segregation 1 like OS=Sus scrofa OX=9823 GN=CSE1L PE=1 SV=3	tr|I3L918|I3L918_PIG (+1)	P55060	109 kDa	0.026	2.4
Leukotriene A(4) hydrolase OS=Sus scrofa OX=9823 GN=LTA4H PE=1 SV=4	tr|F1SQR8|F1SQR8_PIG	P09960	69 kDa	0.027	2
Acylphosphatase-2 OS=Sus scrofa OX=9823 GN=ACYP2 PE=1 SV=2	sp|P00819|ACYP2_PIG	P14621	11 kDa	0.028	2.5
NADH-ubiquinone oxidoreductase chain 5 OS=Sus scrofa OX=9823 GN=MT-ND5 PE=1 SV=1	sp|Q9TDR1|NU5M_PIG	P03915	69 kDa	0.03	2.9
Pitrilysin metallopeptidase 1 OS=Sus scrofa OX=9823 GN=PITRM1 PE=1 SV=2	tr|A0A287BCS4|A0A287BCS4_PIG	A0A0A0MRX9	115 kDa	0.03	0.2
Tax1 binding protein 3 OS=Sus scrofa OX=9823 GN=TAX1BP3 PE=4 SV=2	tr|F2Z516|F2Z516_PIG	O14907	13 kDa	0.031	2.8
Histone H4 OS=Sus scrofa OX=9823 PE=1 SV=2	sp|P62802|H4_PIG	P62805	11 kDa	0.032	1.5
60S ribosomal protein L30 OS=Sus scrofa OX=9823 GN=RPL30 PE=1 SV=1	tr|A0A287B6Y1|A0A287B6Y1_PIG	P62888	13 kDa	0.032	0.1
Eukaryotic initiation factor 4A-I isoform 1 OS=Sus scrofa OX=9823 GN=EIF4A1 PE=1 SV=1	tr|A6M928|A6M928_PIG (+1)	P60842	46 kDa	0.032	6.7
Prostaglandin E synthase 2 OS=Sus scrofa OX=9823 GN=PTGES2 PE=1 SV=3	tr|F1RRY6|F1RRY6_PIG	Q9H7Z7	42 kDa	0.032	2.4
Microtubule associated protein RP/EB family member 1 OS=Sus scrofa OX=9823 GN=MAPRE1 PE=1 SV=2	tr|A0A286ZPA2|A0A286ZPA2_PIG (+1)	Q15691	37 kDa	0.034	3.2
Ig-like domain-containing protein OS=Sus scrofa OX=9823 PE=4 SV=3	tr|A0A075B7I6|A0A075B7I6_PIG	Not present in human	10 kDa	0.035	0.4
Tropomyosin alpha-1 chain OS=Sus scrofa OX=9823 GN=TPM1 PE=1 SV=2	tr|A0A287B5N7|A0A287B5N7_PIG	P09493	40 kDa	0.035	1.5
Uncharacterized protein OS=Sus scrofa OX=9823 PE=4 SV=2	tr|A0A287BNL5|A0A287BNL5_PIG		62 kDa	0.035	0.1
2-oxoisovalerate dehydrogenase subunit alpha OS=Sus scrofa OX=9823 GN=BCKDHA PE=3 SV=4	tr|F1RHA0|F1RHA0_PIG	P12694	50 kDa	0.035	2.4
Uncharacterized protein OS=Sus scrofa OX=9823 GN=AHNAK PE=1 SV=2	tr|A0A286ZPY1|A0A286ZPY1_PIG		130 kDa	0.038	1.5
Tubulin alpha-1B chain OS=Sus scrofa OX=9823 GN=TUBA1B PE=1 SV=1	sp|Q2XVP4|TBA1B_PIG	P68363	50 kDa	0.04	1.8
PDZ domain-containing protein OS=Sus scrofa OX=9823 GN=AHNAK2 PE=1 SV=1	tr|A0A286ZXM0|A0A286ZXM0_PIG (+3)	Q8IVF2	393 kDa	0.04	INF
LIM and senescent cell antigen-like-containing domain protein OS=Sus scrofa OX=9823 GN=LIMS1 PE=1 SV=1	tr|A0A5G2R6E0|A0A5G2R6E0_PIG	P48059	44 kDa	0.04	0
Proteasome 26S subunit, non-ATPase 13 OS=Sus scrofa OX=9823 GN=PSMD13 PE=4 SV=1	tr|F1RGC9|F1RGC9_PIG	Q9UNM6	43 kDa	0.04	INF
Membrane-associated transporter protein OS=Sus scrofa OX=9823 GN=SLC45A2 PE=1 SV=3	tr|F1SP14|F1SP14_PIG	Q9UMX9	42 kDa	0.04	INF
Catechol O-methyltransferase domain-containing protein 1 OS=Sus scrofa OX=9823 GN=COMTD1 PE=1 SV=1	tr|A0A287A5M5|A0A287A5M5_PIG	Q86VU5	29 kDa	0.041	0
40S ribosomal protein S15 OS=Sus scrofa OX=9823 GN=RPS15 PE=3 SV=1	tr|A0A287AMU5|A0A287AMU5_PIG	P62841	17 kDa	0.042	INF
GLOBIN domain-containing protein OS=Sus scrofa OX=9823 GN=LOC100737768 PE=1 SV=1	tr|F1RGX4|F1RGX4_PIG	Not present in human	15 kDa	0.042	1.2
Thymosin beta-4 OS=Sus scrofa OX=9823 GN=TMSB4 PE=3 SV=3	sp|Q95274|TYB4_PIG	P62328	5 kDa	0.043	INF
SEC22 homolog B, vesicle trafficking protein (gene/pseudogene) OS=Sus scrofa OX=9823 GN=SEC22B PE=1 SV=1	tr|A0A287A4A5|A0A287A4A5_PIG (+1)	O75396	24 kDa	0.043	4.9
Isoleucine--tRNA ligase, mitochondrial OS=Sus scrofa OX=9823 GN=IARS2 PE=1 SV=1	tr|A0A480QG80|A0A480QG80_PIG	Q9NSE4	114 kDa	0.043	2
Hemoglobin subunit beta OS=Sus scrofa OX=9823 GN=HBB PE=1 SV=1	tr|F1RII7|F1RII7_PIG	P68871	16 kDa	0.043	1.4
Optineurin OS=Sus scrofa OX=9823 GN=OPTN PE=1 SV=1	sp|Q7YS99|OPTN_PIG (+3)	Q96CV9	66 kDa	0.044	0
ATP synthase-coupling factor 6, mitochondrial OS=Sus scrofa OX=9823 GN=ATP5PF PE=3 SV=2	tr|A0A287B441|A0A287B441_PIG	P18859	13 kDa	0.044	1.9
Peptidylprolyl isomerase OS=Sus scrofa OX=9823 GN=ARF3 PE=1 SV=2	tr|A0A287B5T6|A0A287B5T6_PIG	P61204	38 kDa	0.044	2.1
Mitogen-activated protein kinase kinase kinase 20 OS=Sus scrofa OX=9823 GN=MAP3K20 PE=4 SV=4	tr|F1S066|F1S066_PIG	Q9NYL2	91 kDa	0.044	5.8
LIM domain binding 3 OS=Sus scrofa OX=9823 GN=LDB3 PE=1 SV=2	tr|A0A286ZWE6|A0A286ZWE6_PIG	O75112	76 kDa	0.045	0.6
Uncharacterized protein OS=Sus scrofa OX=9823 GN=RPL12 PE=1 SV=1	tr|A0A5G2R7M9|A0A5G2R7M9_PIG		18 kDa	0.045	0
Uncharacterized protein OS=Sus scrofa OX=9823 GN=PDLIM1 PE=4 SV=4	tr|F1SC51|F1SC51_PIG		53 kDa	0.045	0.7
Calcium-transporting ATPase OS=Sus scrofa OX=9823 GN=ATP2B4 PE=1 SV=1	tr|A0A287APC7|A0A287APC7_PIG	P23634	129 kDa	0.046	INF
N-myc downstream regulated 1 OS=Sus scrofa OX=9823 GN=NDRG1 PE=4 SV=1	tr|A0A287BKE2|A0A287BKE2_PIG	Q92597	42 kDa	0.046	INF
Uncharacterized protein OS=Sus scrofa OX=9823 GN=PZP PE=1 SV=2	tr|A0A287BN06|A0A287BN06_PIG		158 kDa	0.046	2.2
Presequence translocase associated motor 16 OS=Sus scrofa OX=9823 GN=PAM16 PE=1 SV=1	tr|A0A5G2RBH6|A0A5G2RBH6_PIG	Q9Y3D7	17 kDa	0.046	INF
RNA 3'-terminal phosphate cyclase OS=Sus scrofa OX=9823 GN=RTCA PE=1 SV=3	tr|F1S564|F1S564_PIG	O00442	39 kDa	0.046	2.2
Purkinje cell protein 4 OS=Sus scrofa OX=9823 GN=PCP4 PE=4 SV=1	tr|A0A286ZI58|A0A286ZI58_PIG	P48539	7 kDa	0.047	2.1
Sequestosome 1 OS=Sus scrofa OX=9823 GN=SQSTM1 PE=4 SV=1	tr|A0A286ZYR0|A0A286ZYR0_PIG	Q13501	47 kDa	0.047	INF
Septin 9 OS=Sus scrofa OX=9823 GN=SEPTIN9 PE=1 SV=1	tr|A0A5G2QRA0|A0A5G2QRA0_PIG	Q9UHD8	63 kDa	0.047	INF
60S ribosomal protein L27 OS=Sus scrofa OX=9823 GN=RPL27 PE=1 SV=1	sp|A1XQU5|RL27_PIG	P61353	16 kDa	0.048	INF
Hook microtubule tethering protein 3 OS=Sus scrofa OX=9823 GN=HOOK3 PE=1 SV=2	tr|A0A287AUQ4|A0A287AUQ4_PIG	Q86VS8	91 kDa	0.048	0
Palladin isoform X1 OS=Sus scrofa OX=9823 GN=PALLD PE=1 SV=2	tr|F1RIW3|F1RIW3_PIG	Q8WX93	142 kDa	0.048	0
Lectin, mannose binding 2 OS=Sus scrofa OX=9823 GN=LMAN2 PE=1 SV=1	tr|F1S3D5|F1S3D5_PIG	Q12907	40 kDa	0.048	0
Exportin 1 OS=Sus scrofa OX=9823 GN=XPO1 PE=1 SV=1	tr|A0A286ZTK1|A0A286ZTK1_PIG	O14980	123 kDa	0.049	4.1
Importin 7 OS=Sus scrofa OX=9823 GN=IPO7 PE=1 SV=1	tr|A0A287B2B4|A0A287B2B4_PIG	O95373	123 kDa	0.049	INF
Alpha-2-HS-glycoprotein OS=Sus scrofa OX=9823 GN=AHSG PE=1 SV=3	tr|F1SFI7|F1SFI7_PIG	P02765	39 kDa	0.049	0.6
Coatomer subunit gamma OS=Sus scrofa OX=9823 GN=COPG1 PE=1 SV=4	tr|F1SPF9|F1SPF9_PIG	Q9Y678	94 kDa	0.049	0.2
EF-hand domain-containing protein OS=Sus scrofa OX=9823 GN=S100A9 PE=1 SV=1	tr|F6Q697|F6Q697_PIG	P06702	13 kDa	0.05	3.6
40S ribosomal protein S25 OS=Sus scrofa OX=9823 GN=RPS25 PE=3 SV=3	tr|F2Z5G8|F2Z5G8_PIG	P62851	14 kDa	0.051	6.9
Thimet oligopeptidase OS=Sus scrofa OX=9823 GN=THOP1 PE=1 SV=2	tr|A0A287AJM8|A0A287AJM8_PIG (+1)	P52888	84 kDa	0.053	2
RNA transcription, translation and transport factor protein OS=Sus scrofa OX=9823 GN=RTRAF PE=1 SV=1	tr|A0A287B7A0|A0A287B7A0_PIG (+1)	Q9Y224	30 kDa	0.053	1.9
Parvin alpha OS=Sus scrofa OX=9823 GN=PARVA PE=1 SV=1	tr|A0A287B7K9|A0A287B7K9_PIG	Q9NVD7	42 kDa	0.054	1.9
Aly/REF export factor OS=Sus scrofa OX=9823 GN=ALYREF PE=1 SV=1	tr|A0A287BET5|A0A287BET5_PIG	Q86V81	27 kDa	0.054	2.3
RuvB-like helicase OS=Sus scrofa OX=9823 GN=RUVBL2 PE=1 SV=1	tr|A0A481C216|A0A481C216_PIG	Q9Y230	51 kDa	0.054	2.6
Peptidyl-prolyl cis-trans isomerase OS=Sus scrofa OX=9823 GN=PPIB PE=1 SV=1	tr|A0A286ZKG9|A0A286ZKG9_PIG	P23284	22 kDa	0.055	1.8
Uncharacterized protein OS=Sus scrofa OX=9823 GN=TAF15 PE=1 SV=1	tr|A0A5G2RGR9|A0A5G2RGR9_PIG (+1)		62 kDa	0.056	2
Succinate dehydrogenase assembly factor 2, mitochondrial OS=Sus scrofa OX=9823 GN=SDHAF2 PE=1 SV=1	tr|A0A287B6S6|A0A287B6S6_PIG	Q9NX18	20 kDa	0.057	2.3
Myosin-1 OS=Sus scrofa OX=9823 GN=MYH1 PE=2 SV=1	sp|Q9TV61|MYH1_PIG (+1)	P12882	223 kDa	0.058	0
ADP ribosylation factor 4 OS=Sus scrofa OX=9823 GN=ARF4 PE=1 SV=1	tr|A0A5G2R3T3|A0A5G2R3T3_PIG	P18085	19 kDa	0.058	INF
Uncharacterized protein OS=Sus scrofa OX=9823 GN=PERM1 PE=4 SV=1	tr|A0A287ACQ5|A0A287ACQ5_PIG		93 kDa	0.06	0.2
Sorbin and SH3 domain containing 1 OS=Sus scrofa OX=9823 GN=SORBS1 PE=1 SV=2	tr|A0A287BPW9|A0A287BPW9_PIG	Q9BX66	144 kDa	0.06	0.6
60S acidic ribosomal protein P1 OS=Sus scrofa OX=9823 GN=RPLP1 PE=1 SV=1	tr|F1SIT7|F1SIT7_PIG	P05386	12 kDa	0.061	0.8
NADH dehydrogenase [ubiquinone] 1 beta subcomplex subunit 6 OS=Sus scrofa OX=9823 GN=NDUFB6 PE=1 SV=1	tr|F6Q0K3|F6Q0K3_PIG	O95139	12 kDa	0.061	1.7
Uncharacterized protein OS=Sus scrofa OX=9823 PE=4 SV=1	tr|A0A287BP38|A0A287BP38_PIG		39 kDa	0.062	0.6
Periostin OS=Sus scrofa OX=9823 GN=POSTN PE=1 SV=1	tr|F1RS37|F1RS37_PIG	Q15063	93 kDa	0.062	4
U6 snRNA-associated Sm-like protein LSm3 OS=Sus scrofa OX=9823 GN=LSM3 PE=1 SV=1	tr|F2Z5S4|F2Z5S4_PIG	P62310	12 kDa	0.062	3.9
Integrin linked kinase OS=Sus scrofa OX=9823 GN=ILK PE=1 SV=1	tr|A0A287A8C3|A0A287A8C3_PIG (+1)	Q13418	51 kDa	0.063	1.8
Uncharacterized protein OS=Sus scrofa OX=9823 GN=DIABLO PE=1 SV=2	tr|F1RNS2|F1RNS2_PIG		27 kDa	0.063	2
Annexin OS=Sus scrofa OX=9823 GN=ANXA11 PE=1 SV=2	tr|F1S2E2|F1S2E2_PIG	P50995	54 kDa	0.063	0.6
F-actin-capping protein subunit alpha OS=Sus scrofa OX=9823 GN=CAPZA1 PE=1 SV=1	tr|A0A5K1UD05|A0A5K1UD05_PIG	P52907	34 kDa	0.064	4.6
NADH dehydrogenase [ubiquinone] 1 beta subcomplex subunit 8, mitochondrial OS=Sus scrofa OX=9823 GN=NDUFB8 PE=1 SV=1	tr|F1RWL7|F1RWL7_PIG	O95169	22 kDa	0.064	1.5
Acyl-CoA-binding protein OS=Sus scrofa OX=9823 GN=DBI PE=1 SV=2	sp|P12026|ACBP_PIG	P07108	10 kDa	0.066	1.4
Uncharacterized protein OS=Sus scrofa OX=9823 GN=LAMP1 PE=1 SV=1	tr|A0A5G2R3I8|A0A5G2R3I8_PIG		43 kDa	0.066	0
Alpha-2-macroglobulin receptor-associated protein OS=Sus scrofa OX=9823 GN=LRPAP1 PE=1 SV=3	tr|F1S8M9|F1S8M9_PIG	P30533	42 kDa	0.067	1.3
Dynein light chain roadblock OS=Sus scrofa OX=9823 GN=DYNLRB1 PE=1 SV=1	tr|A0A287AAM0|A0A287AAM0_PIG	Q9NP97	11 kDa	0.068	1.3
TAR DNA binding protein OS=Sus scrofa OX=9823 GN=TARDBP PE=4 SV=2	tr|I3LNA4|I3LNA4_PIG	Q13148	45 kDa	0.069	0.2
Major vault protein OS=Sus scrofa OX=9823 GN=MVP PE=1 SV=2	tr|I3LQ79|I3LQ79_PIG	Q14764	100 kDa	0.073	0
HDGF like 3 OS=Sus scrofa OX=9823 GN=HDGFL3 PE=1 SV=1	tr|A0A287AUY5|A0A287AUY5_PIG	Q9Y3E1	23 kDa	0.074	0
CCHC-type zinc finger nucleic acid binding protein OS=Sus scrofa OX=9823 GN=CNBP PE=1 SV=2	tr|A0A287B975|A0A287B975_PIG	P62633	18 kDa	0.075	0.3
Coenzyme Q8A OS=Sus scrofa OX=9823 GN=COQ8A PE=4 SV=1	tr|A0A286ZK64|A0A286ZK64_PIG	Q8NI60	72 kDa	0.077	0.8
Transgelin OS=Sus scrofa OX=9823 GN=TAGLN2 PE=1 SV=1	tr|A0A287AK21|A0A287AK21_PIG	P37802	22 kDa	0.079	0.7
FMR1 autosomal homolog 1 OS=Sus scrofa OX=9823 GN=FXR1 PE=1 SV=1	tr|I3LH62|I3LH62_PIG	P51114	76 kDa	0.079	INF
Uncharacterized protein OS=Sus scrofa OX=9823 GN=NDUFV3 PE=4 SV=3	tr|I3LRR4|I3LRR4_PIG		46 kDa	0.079	0.7
Cytochrome c oxidase subunit 6C OS=Sus scrofa OX=9823 GN=COX6C PE=3 SV=1	sp|A1XQT2|COX6C_PIG	P09669	9 kDa	0.081	1.6
Mitochondrial antiviral signaling protein OS=Sus scrofa OX=9823 GN=MAVS PE=1 SV=1	tr|A0A5K1V3V4|A0A5K1V3V4_PIG	Q7Z434	55 kDa	0.081	0.6
Damage specific DNA binding protein 1 OS=Sus scrofa OX=9823 GN=DDB1 PE=1 SV=3	tr|F1RIE2|F1RIE2_PIG	Q16531	127 kDa	0.081	2.7
Uncharacterized protein OS=Sus scrofa OX=9823 PE=1 SV=2	tr|F1SD73|F1SD73_PIG		7 kDa	0.081	1.8
cAMP-dependent protein kinase inhibitor OS=Sus scrofa OX=9823 GN=PKIA PE=1 SV=1	tr|A0A5G2QDK4|A0A5G2QDK4_PIG	P61925	11 kDa	0.086	2.6
Calponin-homology (CH) domain-containing protein OS=Sus scrofa OX=9823 GN=SMTN PE=1 SV=1	tr|A0A5G2QQ45|A0A5G2QQ45_PIG	P53814	48 kDa	0.086	0.3
Protein disulfide-isomerase OS=Sus scrofa OX=9823 GN=PDIA4 PE=1 SV=1	tr|F1SAD9|F1SAD9_PIG	P13667	73 kDa	0.086	1.6
Uncharacterized protein OS=Sus scrofa OX=9823 GN=EEF1B2 PE=1 SV=1	tr|F1SHD6|F1SHD6_PIG		25 kDa	0.086	0.8
DnaJ heat shock protein family (Hsp40) member B4 OS=Sus scrofa OX=9823 GN=DNAJB4 PE=4 SV=2	tr|F1S9T0|F1S9T0_PIG	Q9UDY4	38 kDa	0.087	0.4
NADH dehydrogenase ubiquinone 1 alpha subcomplex subunit 11 OS=Sus scrofa OX=9823 GN=NDUFA11 PE=1 SV=1	tr|I3LGM4|I3LGM4_PIG	Q86Y39	15 kDa	0.087	0.1
Talin 1 OS=Sus scrofa OX=9823 GN=TLN1 PE=1 SV=1	tr|A0A287AC34|A0A287AC34_PIG	Q9Y490	271 kDa	0.089	0.8
14-3-3 protein zeta/delta OS=Sus scrofa OX=9823 GN=YWHAZ PE=1 SV=1	tr|A0A480PLY3|A0A480PLY3_PIG	P63104	28 kDa	0.089	1.2
Transferrin receptor protein 1 OS=Sus scrofa OX=9823 GN=TFRC PE=2 SV=1	sp|Q8HZV3|TFR1_PIG (+1)	P02786	86 kDa	0.091	1.8
Citramalyl-CoA lyase, mitochondrial isoform X1 OS=Sus scrofa OX=9823 GN=CLYBL PE=1 SV=1	tr|A0A287ABH0|A0A287ABH0_PIG (+1)	Q8N0X4	37 kDa	0.091	1.6
Olfactomedin-like domain-containing protein OS=Sus scrofa OX=9823 GN=OLFML1 PE=1 SV=1	tr|A0A286ZY90|A0A286ZY90_PIG	Q6UWY5	25 kDa	0.092	INF
Small nuclear ribonucleoprotein Sm D3 OS=Sus scrofa OX=9823 GN=SNRPD3 PE=1 SV=1	tr|A0A5G2QV25|A0A5G2QV25_PIG (+1)	P62318	13 kDa	0.092	3.9
Uncharacterized protein OS=Sus scrofa OX=9823 GN=IVD PE=1 SV=1	tr|A0A5G2R8S6|A0A5G2R8S6_PIG		63 kDa	0.092	1.4
BCL2 like 13 OS=Sus scrofa OX=9823 GN=BCL2L13 PE=1 SV=1	tr|A0A5G2RKB0|A0A5G2RKB0_PIG	Q9BXK5	49 kDa	0.093	0.6
Ubiquitin-conjugating enzyme E2L 3 OS=Sus scrofa OX=9823 GN=UBE2L3 PE=1 SV=1	tr|B8Y648|B8Y648_PIG	P68036	18 kDa	0.093	2.4
Peptidoglycan-recognition protein OS=Sus scrofa OX=9823 GN=PGLYRP1 PE=1 SV=1	tr|A0A286ZI97|A0A286ZI97_PIG	O75594	24 kDa	0.094	0.1
Membrane-associated progesterone receptor component 1 OS=Sus scrofa OX=9823 GN=PGRMC1 PE=1 SV=3	sp|Q95250|PGRC1_PIG	O00264	22 kDa	0.095	0.7
Fibrillin-1 OS=Sus scrofa OX=9823 GN=FBN1 PE=1 SV=3	tr|F1SN67|F1SN67_PIG	P35555	312 kDa	0.097	0.3
Uncharacterized protein OS=Sus scrofa OX=9823 PE=4 SV=2	tr|A0A286ZV66|A0A286ZV66_PIG		60 kDa	0.099	0.2
Uncharacterized protein OS=Sus scrofa OX=9823 GN=LAMC1 PE=1 SV=2	tr|A0A287A078|A0A287A078_PIG (+1)		178 kDa	0.099	0.8
DnaJ heat shock protein family (Hsp40) member B6 OS=Sus scrofa OX=9823 GN=DNAJB6 PE=4 SV=2	tr|A0A286ZWP6|A0A286ZWP6_PIG (+1)	O75190	35 kDa	0.1	0.2
Neutral alpha-glucosidase AB OS=Sus scrofa OX=9823 GN=GANAB PE=1 SV=1	tr|A0A287B1C9|A0A287B1C9_PIG (+1)	Q14697	110 kDa	0.1	1.6
Erythrocyte membrane protein band 4.1 like 2 OS=Sus scrofa OX=9823 GN=EPB41L2 PE=4 SV=1	tr|A0A287BFZ2|A0A287BFZ2_PIG	O43491	117 kDa	0.1	1.9
Collagen type V alpha 2 chain OS=Sus scrofa OX=9823 GN=COL5A2 PE=1 SV=2	tr|A0A287BPM1|A0A287BPM1_PIG	P05997	142 kDa	0.1	0.1
Laminin subunit beta 1 OS=Sus scrofa OX=9823 GN=LAMB1 PE=1 SV=1	tr|A0A5G2QKZ6|A0A5G2QKZ6_PIG (+1)	P07942	195 kDa	0.1	0.7
UBIQUITIN_CONJUGAT_2 domain-containing protein OS=Sus scrofa OX=9823 GN=UBE2V2 PE=1 SV=1	tr|A0A5G2R6G7|A0A5G2R6G7_PIG	Q15819	16 kDa	0.1	1.5
Calcyclin binding protein OS=Sus scrofa OX=9823 GN=CACYBP PE=1 SV=1	tr|F1S710|F1S710_PIG	Q9HB71	26 kDa	0.1	0.3
PITH domain containing 1 OS=Sus scrofa OX=9823 GN=PITHD1 PE=1 SV=2	tr|I3L9H4|I3L9H4_PIG	Q9GZP4	24 kDa	0.1	3.6
Pyrophosphatase (inorganic) 2 OS=Sus scrofa OX=9823 GN=PPA2 PE=1 SV=2	tr|I3LFE8|I3LFE8_PIG	Q9H2U2	39 kDa	0.1	1.4
GTP:AMP phosphotransferase AK3, mitochondrial OS=Sus scrofa OX=9823 GN=AK3 PE=1 SV=1	tr|A0A5G2QPK4|A0A5G2QPK4_PIG	Q9UIJ7	26 kDa	0.11	1.5
Ubiquitin associated protein 2 like OS=Sus scrofa OX=9823 GN=UBAP2L PE=1 SV=1	tr|A0A5G2RFH0|A0A5G2RFH0_PIG	Q14157	121 kDa	0.11	2.3
Glycogen [starch] synthase OS=Sus scrofa OX=9823 GN=GYS1 PE=1 SV=3	tr|F1RIP1|F1RIP1_PIG	P13807	84 kDa	0.11	1.6
Protein phosphatase, Mg2+/Mn2+ dependent 1F OS=Sus scrofa OX=9823 GN=PPM1F PE=1 SV=2	tr|F1RL04|F1RL04_PIG	P49593	48 kDa	0.11	2
ETHE1 persulfide dioxygenase OS=Sus scrofa OX=9823 GN=ETHE1 PE=1 SV=3	tr|F1RMV5|F1RMV5_PIG	O95571	28 kDa	0.11	0.4
Arginine--tRNA ligase, cytoplasmic OS=Sus scrofa OX=9823 GN=RARS1 PE=1 SV=3	tr|F1RR89|F1RR89_PIG	P54136	75 kDa	0.11	0.3
Adenylyl cyclase-associated protein OS=Sus scrofa OX=9823 GN=CAP2 PE=1 SV=3	tr|F1RUJ0|F1RUJ0_PIG	P40123	54 kDa	0.11	1.5
Uncharacterized protein OS=Sus scrofa OX=9823 GN=TPM2 PE=1 SV=2	tr|F1SG00|F1SG00_PIG		33 kDa	0.11	1.4
Plasminogen receptor with a C-terminal lysine OS=Sus scrofa OX=9823 GN=PLGRKT PE=1 SV=1	tr|F1SK49|F1SK49_PIG	Q9HBL7	17 kDa	0.11	3.5
Creatine kinase B-type OS=Sus scrofa OX=9823 GN=CKB PE=2 SV=2	sp|Q29594|KCRB_PIG (+1)	P12277	43 kDa	0.12	1.5
Cytochrome c oxidase subunit 5B, mitochondrial OS=Sus scrofa OX=9823 GN=COX5B PE=2 SV=1	sp|Q5S3G4|COX5B_PIG	P10606	14 kDa	0.12	0.6
Uncharacterized protein OS=Sus scrofa OX=9823 GN=SGCG PE=4 SV=2	tr|A0A287A515|A0A287A515_PIG		41 kDa	0.12	1.8
Endoplasmin OS=Sus scrofa OX=9823 GN=HSP90B1 PE=1 SV=2	tr|A0A287AFA5|A0A287AFA5_PIG	P14625	92 kDa	0.12	1.2
Perilipin 4 OS=Sus scrofa OX=9823 GN=PLIN4 PE=1 SV=2	tr|A0A287AV63|A0A287AV63_PIG	Q96Q06	162 kDa	0.12	0.7
Uncharacterized protein OS=Sus scrofa OX=9823 GN=OAT PE=1 SV=1	tr|A0A287BBB4|A0A287BBB4_PIG		54 kDa	0.12	0.7
Fermitin family member 2 OS=Sus scrofa OX=9823 GN=FERMT2 PE=1 SV=1	tr|A0A287BDZ6|A0A287BDZ6_PIG	Q96AC1	79 kDa	0.12	1.5
Mediator of cell motility 1 OS=Sus scrofa OX=9823 GN=MEMO1 PE=1 SV=1	tr|A0A287BNP5|A0A287BNP5_PIG (+1)	Q9Y316	31 kDa	0.12	5.3
Putative hydroxypyruvate isomerase OS=Sus scrofa OX=9823 GN=HYI PE=1 SV=1	tr|A0A480XGR1|A0A480XGR1_PIG	Q5T013	30 kDa	0.12	0.9
Abhydrolase domain containing 11 OS=Sus scrofa OX=9823 GN=ABHD11 PE=4 SV=3	tr|F1RJM8|F1RJM8_PIG	Q8NFV4	34 kDa	0.12	1.5
Uncharacterized protein OS=Sus scrofa OX=9823 GN=ACTN1 PE=1 SV=1	tr|I3LLY3|I3LLY3_PIG		102 kDa	0.12	1.8
Uncharacterized protein OS=Sus scrofa OX=9823 PE=4 SV=1	tr|A0A286ZIE2|A0A286ZIE2_PIG		48 kDa	0.13	0.1
Fructose-bisphosphate aldolase OS=Sus scrofa OX=9823 GN=ALDOB PE=1 SV=1	tr|A0A286ZTA4|A0A286ZTA4_PIG	P05062	40 kDa	0.13	0.3
Fructose-bisphosphate aldolase OS=Sus scrofa OX=9823 GN=ALDOC PE=1 SV=1	tr|A0A287B8Z2|A0A287B8Z2_PIG	P09972	47 kDa	0.13	1.5
Uncharacterized protein OS=Sus scrofa OX=9823 GN=TXNRD2 PE=1 SV=1	tr|A0A287BQ74|A0A287BQ74_PIG (+1)		66 kDa	0.13	1.8
Methylthioribose-1-phosphate isomerase OS=Sus scrofa OX=9823 GN=MRI1 PE=1 SV=1	tr|A0A5G2QJP4|A0A5G2QJP4_PIG	Q9BV20	44 kDa	0.13	1.7
Collagen type I alpha 1 chain OS=Sus scrofa OX=9823 GN=COL1A1 PE=1 SV=1	tr|A0A5G2QQE9|A0A5G2QQE9_PIG	P02452	141 kDa	0.13	1.3
Catenin alpha 1 OS=Sus scrofa OX=9823 GN=CTNNA1 PE=1 SV=1	tr|A0A5G2R7Z4|A0A5G2R7Z4_PIG	P35221	100 kDa	0.13	0.6
60S ribosomal protein L18 OS=Sus scrofa OX=9823 GN=RPL18 PE=1 SV=1	tr|A0A5S8L0N9|A0A5S8L0N9_PIG	Q07020	25 kDa	0.13	1.8
Lactate dehydrogenase D OS=Sus scrofa OX=9823 GN=LDHD PE=1 SV=3	tr|F1S451|F1S451_PIG	Q86WU2	52 kDa	0.13	0.3
Acidic leucine-rich nuclear phosphoprotein 32 family member A OS=Sus scrofa OX=9823 GN=ANP32A PE=1 SV=3	tr|F1SIV3|F1SIV3_PIG	P39687	29 kDa	0.13	0.7
Ribosomal protein L19 OS=Sus scrofa OX=9823 GN=RPL19 PE=1 SV=4	tr|F2Z546|F2Z546_PIG	P84098	30 kDa	0.13	5
Dpy-30 histone methyltransferase complex regulatory subunit OS=Sus scrofa OX=9823 GN=DPY30 PE=1 SV=1	tr|F2Z5F7|F2Z5F7_PIG	Q9C005	11 kDa	0.13	2.4
DnaJ heat shock protein family (Hsp40) member A3 OS=Sus scrofa OX=9823 GN=DNAJA3 PE=1 SV=2	tr|I3LLG4|I3LLG4_PIG	Q96EY1	54 kDa	0.13	0.1
NADH:ubiquinone oxidoreductase subunit B9 OS=Sus scrofa OX=9823 GN=NDUFB9 PE=1 SV=2	tr|K7GSE5|K7GSE5_PIG	Q9Y6M9	26 kDa	0.13	1.7
Vinculin OS=Sus scrofa OX=9823 GN=VCL PE=1 SV=4	sp|P26234|VINC_PIG	P18206	124 kDa	0.14	0.9
40S ribosomal protein S12 OS=Sus scrofa OX=9823 GN=RPS12 PE=1 SV=2	sp|P46405|RS12_PIG	P25398	15 kDa	0.14	0.4
Small muscular protein OS=Sus scrofa OX=9823 GN=SMPX PE=2 SV=1	sp|Q0MUU2|SMPX_PIG	Q9UHP9	9 kDa	0.14	1.9
Dolichyl-diphosphooligosaccharide--protein glycosyltransferase subunit DAD1 OS=Sus scrofa OX=9823 GN=DAD1 PE=3 SV=3	sp|Q29036|DAD1_PIG	P61803	13 kDa	0.14	INF
Thioredoxin domain-containing protein OS=Sus scrofa OX=9823 GN=TMX4 PE=1 SV=1	tr|A0A286ZIT3|A0A286ZIT3_PIG (+3)	Q9H1E5	38 kDa	0.14	INF
Mitochondrial ribosomal protein L11 OS=Sus scrofa OX=9823 GN=MRPL11 PE=1 SV=2	tr|A0A286ZMR4|A0A286ZMR4_PIG	Q9Y3B7	26 kDa	0.14	0
Eukaryotic translation initiation factor 2A OS=Sus scrofa OX=9823 GN=EIF2A PE=1 SV=2	tr|A0A286ZPR5|A0A286ZPR5_PIG (+1)	Q9BY44	62 kDa	0.14	0
Adducin 1 OS=Sus scrofa OX=9823 GN=ADD1 PE=1 SV=2	tr|A0A286ZR45|A0A286ZR45_PIG	P35611	86 kDa	0.14	0.6
WD repeat domain 37 OS=Sus scrofa OX=9823 GN=WDR37 PE=1 SV=2	tr|A0A286ZXF5|A0A286ZXF5_PIG	Q9Y2I8	75 kDa	0.14	0
Hexose-6-phosphate dehydrogenase/glucose 1-dehydrogenase OS=Sus scrofa OX=9823 GN=H6PD PE=4 SV=2	tr|A0A286ZYN1|A0A286ZYN1_PIG (+2)	O95479	89 kDa	0.14	0
Aspartyl-tRNA synthetase OS=Sus scrofa OX=9823 GN=DARS1 PE=1 SV=1	tr|A0A286ZYS2|A0A286ZYS2_PIG	P14868	53 kDa	0.14	1.8
Heat shock protein family B (small) member 3 OS=Sus scrofa OX=9823 GN=HSPB3 PE=3 SV=1	tr|A0A287A271|A0A287A271_PIG	Q12988	17 kDa	0.14	0
Chromosome 5 open reading frame 51 OS=Sus scrofa OX=9823 GN=C16H5orf51 PE=1 SV=1	tr|A0A287A4F4|A0A287A4F4_PIG	Not present in human	28 kDa	0.14	INF
Argininosuccinate synthase 1 OS=Sus scrofa OX=9823 GN=ASS1 PE=3 SV=2	tr|A0A287A9G4|A0A287A9G4_PIG	P00966	48 kDa	0.14	0.2
Farnesyltransferase, CAAX box, alpha OS=Sus scrofa OX=9823 GN=FNTA PE=1 SV=1	tr|A0A287AB08|A0A287AB08_PIG (+1)	P49354	43 kDa	0.14	INF
Proliferating cell nuclear antigen OS=Sus scrofa OX=9823 GN=PCNA PE=1 SV=2	tr|A0A287ABG2|A0A287ABG2_PIG	P12004	30 kDa	0.14	0
ATP-dependent Clp protease ATP-binding subunit clpX-like, mitochondrial OS=Sus scrofa OX=9823 GN=CLPX PE=1 SV=1	tr|A0A287ADU8|A0A287ADU8_PIG	O76031	69 kDa	0.14	INF
Transmembrane protein 65 OS=Sus scrofa OX=9823 GN=TMEM65 PE=1 SV=1	tr|A0A287AEX4|A0A287AEX4_PIG	Q6PI78	27 kDa	0.14	INF
Carbonic anhydrase 14 OS=Sus scrofa OX=9823 GN=CA14 PE=1 SV=2	tr|A0A287B0I5|A0A287B0I5_PIG (+1)	Q9ULX7	37 kDa	0.14	INF
Chromobox protein homolog 3 isoform X1 OS=Sus scrofa OX=9823 GN=CBX3 PE=1 SV=1	tr|A0A287B0T7|A0A287B0T7_PIG	Q13185	21 kDa	0.14	INF
Alpha-1,4 glucan phosphorylase OS=Sus scrofa OX=9823 GN=PYGM PE=3 SV=2	tr|A0A287B6I2|A0A287B6I2_PIG	P35573	154 kDa	0.14	1.5
Uncharacterized protein OS=Sus scrofa OX=9823 PE=1 SV=1	tr|A0A287BAB5|A0A287BAB5_PIG		10 kDa	0.14	0
Collagen type XIV alpha 1 chain OS=Sus scrofa OX=9823 GN=COL14A1 PE=1 SV=1	tr|A0A287BGV6|A0A287BGV6_PIG	Q05707	191 kDa	0.14	1.7
Armadillo repeat containing X-linked 3 OS=Sus scrofa OX=9823 GN=ARMCX3 PE=1 SV=1	tr|A0A287BGW5|A0A287BGW5_PIG	Q9UH62	43 kDa	0.14	INF
Eukaryotic translation initiation factor 4 gamma 2 OS=Sus scrofa OX=9823 GN=EIF4G2 PE=1 SV=1	tr|A0A287BKE1|A0A287BKE1_PIG	P78344	103 kDa	0.14	INF
26S proteasome non-ATPase regulatory subunit 12 OS=Sus scrofa OX=9823 GN=PSMD12 PE=1 SV=1	tr|A0A480SMR6|A0A480SMR6_PIG	O00232	53 kDa	0.14	INF
Prune exopolyphosphatase 1 OS=Sus scrofa OX=9823 GN=PRUNE1 PE=1 SV=1	tr|A0A5G2Q9P0|A0A5G2Q9P0_PIG (+2)	Q86TP1	49 kDa	0.14	INF
Calponin-homology (CH) domain-containing protein OS=Sus scrofa OX=9823 GN=SMTN PE=1 SV=1	tr|A0A5G2QI59|A0A5G2QI59_PIG	P53814	99 kDa	0.14	0.5
Dihydroorotate dehydrogenase (quinone), mitochondrial OS=Sus scrofa OX=9823 GN=DHODH PE=1 SV=1	tr|A0A5G2QM53|A0A5G2QM53_PIG (+1)	Q02127	43 kDa	0.14	0
SH3 domain containing GRB2 like, endophilin B2 OS=Sus scrofa OX=9823 GN=SH3GLB2 PE=1 SV=1	tr|A0A5G2R5C7|A0A5G2R5C7_PIG	Q9NR46	44 kDa	0.14	INF
Integrin subunit alpha 1 OS=Sus scrofa OX=9823 GN=ITGA1 PE=1 SV=1	tr|A0A5G2R836|A0A5G2R836_PIG	P56199	130 kDa	0.14	0
Protein-serine/threonine kinase OS=Sus scrofa OX=9823 GN=BCKDK PE=1 SV=1	tr|A0A5G2RBL5|A0A5G2RBL5_PIG	O14874	41 kDa	0.14	INF
Integrin subunit alpha 7 OS=Sus scrofa OX=9823 GN=ITGA7 PE=3 SV=1	tr|A0A5G2RFV8|A0A5G2RFV8_PIG	Q13683	123 kDa	0.14	0.4
MAPK activated protein kinase 3 OS=Sus scrofa OX=9823 GN=MAPKAPK3 PE=3 SV=1	tr|A0A5K1UJP6|A0A5K1UJP6_PIG	Q16644	39 kDa	0.14	0
GNAS complex locus OS=Sus scrofa OX=9823 GN=GNAS PE=1 SV=1	tr|A5GFU0|A5GFU0_PIG	P63092	107 kDa	0.14	1.6
SH3 domain containing GRB2 like, endophilin B1 OS=Sus scrofa OX=9823 GN=SH3GLB1 PE=1 SV=1	tr|D0G7F3|D0G7F3_PIG	Q9Y371	41 kDa	0.14	INF
AP complex subunit beta OS=Sus scrofa OX=9823 GN=AP1B1 PE=1 SV=4	tr|F1RFI2|F1RFI2_PIG	Q10567	105 kDa	0.14	INF
AP-2 complex subunit alpha OS=Sus scrofa OX=9823 GN=AP2A1 PE=1 SV=2	tr|F1RH60|F1RH60_PIG (+1)	O95782	108 kDa	0.14	INF
ATP-dependent 6-phosphofructokinase OS=Sus scrofa OX=9823 GN=PFKP PE=1 SV=4	tr|F1RX49|F1RX49_PIG	Q01813	91 kDa	0.14	INF
Leucine rich repeat and coiled-coil centrosomal protein 1 OS=Sus scrofa OX=9823 GN=LRRCC1 PE=4 SV=4	tr|F1RXB7|F1RXB7_PIG	Q9C099	119 kDa	0.14	INF
ATP-citrate synthase OS=Sus scrofa OX=9823 GN=ACLY PE=1 SV=3	tr|F1S0N2|F1S0N2_PIG	P53396	124 kDa	0.14	INF
Coiled-coil domain containing 124 OS=Sus scrofa OX=9823 GN=CCDC124 PE=4 SV=1	tr|F1S924|F1S924_PIG	Q96CT7	26 kDa	0.14	INF
Proteasome 26S subunit, non-ATPase 6 OS=Sus scrofa OX=9823 GN=PSMD6 PE=1 SV=3	tr|F1SGF1|F1SGF1_PIG	Q15008	52 kDa	0.14	INF
Leiomodin 2 OS=Sus scrofa OX=9823 GN=LMOD2 PE=4 SV=1	tr|F1SLY4|F1SLY4_PIG	Q6P5Q4	62 kDa	0.14	0.6
T-complex protein 1 subunit delta OS=Sus scrofa OX=9823 GN=CCT4 PE=1 SV=1	tr|F1SQN1|F1SQN1_PIG	P50991	58 kDa	0.14	1.6
Dehydrogenase/reductase SDR family member 7 isoform 1 OS=Sus scrofa OX=9823 GN=DHRS7 PE=1 SV=1	tr|F1SSI2|F1SSI2_PIG	Q9Y394	38 kDa	0.14	0
Selenoprotein I OS=Sus scrofa OX=9823 GN=SELENOI PE=1 SV=3	tr|I3L5E9|I3L5E9_PIG	Q9C0D9	44 kDa	0.14	INF
28S ribosomal protein S9, mitochondrial OS=Sus scrofa OX=9823 GN=MRPS9 PE=1 SV=2	tr|I3LU08|I3LU08_PIG	P82933	46 kDa	0.14	0
Actin gamma 1 OS=Sus scrofa OX=9823 GN=ACTG1 PE=1 SV=1	tr|I3LVD5|I3LVD5_PIG	P63261	42 kDa	0.14	0.7
Eukaryotic initiation factor 4A-III OS=Sus scrofa OX=9823 GN=EIF4A3 PE=2 SV=1	sp|A6M931|IF4A3_PIG	P38919	47 kDa	0.15	INF
SLA class II histocompatibility antigen, DQ haplotype D alpha chain OS=Sus scrofa OX=9823 PE=2 SV=1	sp|P15981|HA2D_PIG (+1)	Not present in human	28 kDa	0.15	0
Retinol-binding protein 4 OS=Sus scrofa OX=9823 GN=RBP4 PE=1 SV=2	sp|P27485|RET4_PIG (+1)	P02753	23 kDa	0.15	0
Translationally-controlled tumor protein OS=Sus scrofa OX=9823 GN=TPT1 PE=2 SV=1	sp|P61288|TCTP_PIG (+2)	P13693	20 kDa	0.15	1.9
Prostaglandin reductase 1 OS=Sus scrofa OX=9823 GN=PTGR1 PE=1 SV=1	sp|Q29073|PTGR1_PIG (+1)	Q14914	36 kDa	0.15	0
LIM and cysteine-rich domains protein 1 OS=Sus scrofa OX=9823 GN=LMCD1 PE=2 SV=1	sp|Q5PXT2|LMCD1_PIG	Q9NZU5	41 kDa	0.15	0
ATP-binding cassette sub-family F member 1 OS=Sus scrofa OX=9823 GN=ABCF1 PE=3 SV=1	sp|Q767L0|ABCF1_PIG	Q8NE71	92 kDa	0.15	INF
ATP synthase subunit e, mitochondrial OS=Sus scrofa OX=9823 GN=ATP5ME PE=3 SV=4	sp|Q9MYT8|ATP5I_PIG	P56385	8 kDa	0.15	1.2
Protein S100 OS=Sus scrofa OX=9823 GN=LOC110258323 PE=1 SV=1	tr|A0A286ZP11|A0A286ZP11_PIG	A0A0S2Z4C5	15 kDa	0.15	0
Cysteinyl-tRNA synthetase 2, mitochondrial OS=Sus scrofa OX=9823 GN=CARS2 PE=1 SV=1	tr|A0A287A2J3|A0A287A2J3_PIG (+1)	Q9HA77	61 kDa	0.15	0
Trafficking from ER to golgi regulator OS=Sus scrofa OX=9823 GN=TFG PE=1 SV=2	tr|A0A287AB01|A0A287AB01_PIG (+1)	Q92734	43 kDa	0.15	1.7
Acetyl-CoA acetyltransferase 2 OS=Sus scrofa OX=9823 GN=ACAT2 PE=1 SV=1	tr|A0A287AHQ0|A0A287AHQ0_PIG	Q9BWD1	41 kDa	0.15	INF
Mitochondrial ribosomal protein L41 OS=Sus scrofa OX=9823 GN=MRPL41 PE=1 SV=1	tr|A0A287AWS0|A0A287AWS0_PIG	Q8IXM3	15 kDa	0.15	INF
Sarcolemma associated protein OS=Sus scrofa OX=9823 GN=SLMAP PE=4 SV=2	tr|A0A287AYR9|A0A287AYR9_PIG	Q14BN4	95 kDa	0.15	1.4
Uncharacterized protein OS=Sus scrofa OX=9823 GN=RAB5C PE=1 SV=1	tr|A0A287BN36|A0A287BN36_PIG		23 kDa	0.15	INF
Catenin alpha-2 isoform 1 OS=Sus scrofa OX=9823 GN=CTNNA2 PE=1 SV=1	tr|A0A480F400|A0A480F400_PIG	P26232	100 kDa	0.15	0
CDGSH iron sulfur domain 3 OS=Sus scrofa OX=9823 GN=CISD3 PE=1 SV=1	tr|A0A480XMR2|A0A480XMR2_PIG	P0C7P0	14 kDa	0.15	0
Synaptojanin 2 binding protein OS=Sus scrofa OX=9823 GN=SYNJ2BP PE=1 SV=1	tr|A0A5G2Q9V3|A0A5G2Q9V3_PIG	P57105	15 kDa	0.15	0
Inter-alpha-trypsin inhibitor heavy chain 3 OS=Sus scrofa OX=9823 GN=ITIH3 PE=1 SV=1	tr|A0A5G2QKR9|A0A5G2QKR9_PIG (+1)	Q06033	97 kDa	0.15	INF
Protein S100 OS=Sus scrofa OX=9823 GN=S100A8 PE=1 SV=1	tr|C3S7K5|C3S7K5_PIG	P05109	10 kDa	0.15	2.1
Multifunctional fusion protein OS=Sus scrofa OX=9823 GN=FGF1 PE=1 SV=1	tr|F1RM38|F1RM38_PIG	B3KUK7	17 kDa	0.15	0
RNA binding motif protein 14 OS=Sus scrofa OX=9823 GN=RBM14 PE=1 SV=3	tr|F1RUT1|F1RUT1_PIG	Q96PK6	40 kDa	0.15	0.2
Prolargin OS=Sus scrofa OX=9823 GN=PRELP PE=1 SV=3	tr|F1S6B4|F1S6B4_PIG	P51888	44 kDa	0.15	1.7
Nucleolin OS=Sus scrofa OX=9823 GN=NCL PE=1 SV=2	tr|F1SMV6|F1SMV6_PIG	P19338	78 kDa	0.15	1.5
Carnosine dipeptidase 2 OS=Sus scrofa OX=9823 GN=CNDP2 PE=1 SV=1	tr|F1SNL7|F1SNL7_PIG	Q96KP4	53 kDa	0.15	1.9
60S ribosomal protein L8 OS=Sus scrofa OX=9823 GN=RPL8 PE=1 SV=1	tr|F2Z567|F2Z567_PIG	P62917	28 kDa	0.15	0.2
Troponin I3, cardiac type OS=Sus scrofa OX=9823 GN=TNNI3 PE=1 SV=3	tr|I3LAL4|I3LAL4_PIG	P19429	24 kDa	0.15	1.3
KH RNA binding domain containing, signal transduction associated 1 OS=Sus scrofa OX=9823 GN=KHDRBS1 PE=4 SV=1	tr|I3LP11|I3LP11_PIG	Q07666	48 kDa	0.15	INF
NADH-ubiquinone oxidoreductase chain 4 OS=Sus scrofa OX=9823 GN=MT-ND4 PE=1 SV=2	sp|O79881|NU4M_PIG	P03905	52 kDa	0.16	2
Adrenodoxin, mitochondrial OS=Sus scrofa OX=9823 GN=FDX1 PE=1 SV=2	sp|P00258|ADX_PIG	P10109	20 kDa	0.16	INF
Myoglobin OS=Sus scrofa OX=9823 GN=MB PE=1 SV=2	sp|P02189|MYG_PIG	P02144	17 kDa	0.16	1.3
Palmdelphin OS=Sus scrofa OX=9823 GN=PALMD PE=2 SV=1	sp|Q2MJV9|PALMD_PIG	Q9NP74	62 kDa	0.16	0.7
40S ribosomal protein S23 OS=Sus scrofa OX=9823 GN=RPS23 PE=1 SV=3	sp|Q6SA96|RS23_PIG (+1)	P62266	16 kDa	0.16	0.2
Pyridoxal kinase OS=Sus scrofa OX=9823 GN=PDXK PE=1 SV=2	tr|A0A286ZIG4|A0A286ZIG4_PIG	O00764	42 kDa	0.16	1.5
Ethylmalonyl-CoA decarboxylase 1 OS=Sus scrofa OX=9823 GN=ECHDC1 PE=1 SV=1	tr|A0A286ZZC3|A0A286ZZC3_PIG	Q9NTX5	33 kDa	0.16	1.5
Alpha-1,4 glucan phosphorylase OS=Sus scrofa OX=9823 GN=PYGL PE=1 SV=1	tr|A0A287AL94|A0A287AL94_PIG	E9PK47	98 kDa	0.16	1.5
Sperm associated antigen 8 OS=Sus scrofa OX=9823 GN=SPAG8 PE=1 SV=2	tr|A0A287BA79|A0A287BA79_PIG	Q99932	33 kDa	0.16	0.6
FAD synthase OS=Sus scrofa OX=9823 GN=FLAD1 PE=1 SV=1	tr|A0A287BDR1|A0A287BDR1_PIG	Q8NFF5	56 kDa	0.16	4.3
Collagen type VI alpha 5 chain OS=Sus scrofa OX=9823 GN=COL6A5 PE=1 SV=2	tr|A0A287BK35|A0A287BK35_PIG	A8TX70	262 kDa	0.16	3.6
Tensin 1 OS=Sus scrofa OX=9823 GN=TNS1 PE=1 SV=1	tr|A0A5G2QNI3|A0A5G2QNI3_PIG	Q9HBL0	200 kDa	0.16	0.6
Collagen type VI alpha 6 chain OS=Sus scrofa OX=9823 GN=COL6A6 PE=1 SV=1	tr|A0A5G2R0Y2|A0A5G2R0Y2_PIG	A6NMZ7	248 kDa	0.16	1.8
Eukaryotic translation initiation factor 3 subunit J OS=Sus scrofa OX=9823 GN=EIF3J PE=1 SV=1	tr|A0A5G2R3H6|A0A5G2R3H6_PIG	O75822	29 kDa	0.16	0.5
Inter-alpha-trypsin inhibitor heavy chain H4 OS=Sus scrofa OX=9823 GN=ITIH4 PE=1 SV=1	tr|A0A5G2R7M3|A0A5G2R7M3_PIG	Q14624	102 kDa	0.16	2.2
Sugar phosphate phosphatase OS=Sus scrofa OX=9823 GN=ARMT1 PE=1 SV=1	tr|A0A5G2R9Z3|A0A5G2R9Z3_PIG	Q9H993	50 kDa	0.16	4
Myosin-2 OS=Sus scrofa OX=9823 GN=MYH2 PE=1 SV=1	tr|A0A5G2RAA2|A0A5G2RAA2_PIG	Q9UKX2	204 kDa	0.16	2.7
Farnesyl diphosphate synthase OS=Sus scrofa OX=9823 GN=FDPS PE=1 SV=1	tr|D0G6X4|D0G6X4_PIG	P14324	49 kDa	0.16	0
Uncharacterized protein OS=Sus scrofa OX=9823 GN=PEBP1 PE=1 SV=1	tr|F1RKG8|F1RKG8_PIG		21 kDa	0.16	0.8
Transmembrane protein 177 OS=Sus scrofa OX=9823 GN=TMEM177 PE=4 SV=1	tr|F1RXW5|F1RXW5_PIG	Q53S58	34 kDa	0.16	0
EF-hand domain family member D1 OS=Sus scrofa OX=9823 GN=EFHD1 PE=1 SV=3	tr|F1SMT0|F1SMT0_PIG	Q9BUP0	27 kDa	0.16	5.2
Annexin OS=Sus scrofa OX=9823 GN=ANXA7 PE=1 SV=4	tr|F1SU59|F1SU59_PIG (+1)	P20073	50 kDa	0.16	0.7
Tropomyosin alpha-1 chain OS=Sus scrofa OX=9823 GN=TPM1 PE=1 SV=3	tr|F2Z5B6|F2Z5B6_PIG	P09493	30 kDa	0.16	INF
RNA-binding protein 8A OS=Sus scrofa OX=9823 GN=RBM8A PE=1 SV=2	tr|I3LI59|I3LI59_PIG	Q9Y5S9	20 kDa	0.16	INF
Fat storage-inducing transmembrane protein 2 OS=Sus scrofa OX=9823 GN=FITM2 PE=2 SV=1	sp|B2LYG4|FITM2_PIG (+2)	Q8N6M3	30 kDa	0.17	INF
Vitronectin OS=Sus scrofa OX=9823 GN=VTN PE=1 SV=1	sp|P48819|VTNC_PIG	P04004	53 kDa	0.17	2
Dystrophin OS=Sus scrofa OX=9823 GN=DMD PE=1 SV=1	sp|Q5GN48|DMD_PIG	P11532	425 kDa	0.17	0
PGAM family member 5, mitochondrial serine/threonine protein phosphatase OS=Sus scrofa OX=9823 GN=PGAM5 PE=4 SV=1	tr|A0A286ZVG1|A0A286ZVG1_PIG	Q96HS1	32 kDa	0.17	0.3
Ribosomal protein L38 OS=Sus scrofa OX=9823 GN=RPL38 PE=1 SV=1	tr|A0A287AE36|A0A287AE36_PIG	P63173	10 kDa	0.17	INF
D-2-hydroxyglutarate dehydrogenase OS=Sus scrofa OX=9823 GN=D2HGDH PE=1 SV=1	tr|A0A287B6H6|A0A287B6H6_PIG (+3)	Q8N465	54 kDa	0.17	0.7
Actin related protein 3 OS=Sus scrofa OX=9823 GN=ACTR3 PE=1 SV=1	tr|A0A287BS06|A0A287BS06_PIG	P61158	47 kDa	0.17	0.6
Nuclear autoantigenic sperm protein OS=Sus scrofa OX=9823 GN=NASP PE=1 SV=1	tr|A0A5G2QJ28|A0A5G2QJ28_PIG (+1)	P49321	87 kDa	0.17	0
Alpha-soluble NSF attachment protein OS=Sus scrofa OX=9823 GN=NAPA PE=1 SV=1	tr|A0A5G2QQW2|A0A5G2QQW2_PIG	P54920	33 kDa	0.17	1.7
Chaperonin containing TCP1 subunit 5 OS=Sus scrofa OX=9823 GN=CCT5 PE=1 SV=1	tr|A0A5G2QVV0|A0A5G2QVV0_PIG (+1)	P48643	62 kDa	0.17	1.5
B5 domain-containing protein OS=Sus scrofa OX=9823 GN=FARSB PE=1 SV=1	tr|A0A5G2RG03|A0A5G2RG03_PIG (+1)	Q9NSD9	67 kDa	0.17	0.4
BCL2 associated athanogene 3 OS=Sus scrofa OX=9823 GN=BAG3 PE=1 SV=2	tr|F1S415|F1S415_PIG	O95817	65 kDa	0.17	1.4
Uncharacterized protein OS=Sus scrofa OX=9823 GN=TCP1 PE=1 SV=2	tr|F1SB63|F1SB63_PIG		61 kDa	0.17	1.6
NADH dehydrogenase ubiquinone 1 beta subcomplex subunit 5, mitochondrial isoform 1 OS=Sus scrofa OX=9823 GN=NDUFB5 PE=1 SV=1	tr|F1SGC6|F1SGC6_PIG	O43674	22 kDa	0.17	1.5
Mitochondrial ribosome recycling factor OS=Sus scrofa OX=9823 GN=MRRF PE=1 SV=1	tr|F1SLQ7|F1SLQ7_PIG	Q96E11	29 kDa	0.17	1.8
Protein Niban OS=Sus scrofa OX=9823 GN=NIBAN1 PE=1 SV=2	tr|K7GRN9|K7GRN9_PIG	Q9BZQ8	103 kDa	0.17	0.6
Calpain small subunit 1 OS=Sus scrofa OX=9823 GN=CAPNS1 PE=1 SV=1	sp|P04574|CPNS1_PIG (+1)	P04632	28 kDa	0.18	1.2
Ig-like domain-containing protein OS=Sus scrofa OX=9823 PE=4 SV=2	tr|A0A286ZSX6|A0A286ZSX6_PIG	Not present in human	12 kDa	0.18	0
Uncharacterized protein OS=Sus scrofa OX=9823 GN=ANK3 PE=4 SV=2	tr|A0A287B9B1|A0A287B9B1_PIG		206 kDa	0.18	1.5
Mitofusin 2 OS=Sus scrofa OX=9823 GN=MFN2 PE=1 SV=1	tr|A0A287BLE2|A0A287BLE2_PIG (+1)	O95140	86 kDa	0.18	0
Nuclear mitotic apparatus protein 1 OS=Sus scrofa OX=9823 GN=NUMA1 PE=1 SV=1	tr|A0A287BP49|A0A287BP49_PIG	Q14980	239 kDa	0.18	0.4
Aconitase 1 OS=Sus scrofa OX=9823 GN=ACO1 PE=1 SV=1	tr|A0A287BQT2|A0A287BQT2_PIG	P21399	98 kDa	0.18	1.5
Lipoyl synthase, mitochondrial OS=Sus scrofa OX=9823 GN=LIAS PE=3 SV=1	tr|A0A480R659|A0A480R659_PIG (+1)	O43766	42 kDa	0.18	0
Myosin-2 OS=Sus scrofa OX=9823 GN=MYH2 PE=3 SV=1	tr|A0A5G2Q7D6|A0A5G2Q7D6_PIG	Q9UKX2	223 kDa	0.18	0.2
Fibrinogen gamma chain OS=Sus scrofa OX=9823 GN=FGG PE=1 SV=1	tr|A0A5G2QUU1|A0A5G2QUU1_PIG (+2)	P02679	50 kDa	0.18	2
Threonyl-tRNA synthetase OS=Sus scrofa OX=9823 GN=TARS1 PE=1 SV=1	tr|A0A5G2QVT3|A0A5G2QVT3_PIG	P26639	83 kDa	0.18	3.7
Phospholipase A2 activating protein OS=Sus scrofa OX=9823 GN=PLAA PE=1 SV=1	tr|A0A5G2R0I9|A0A5G2R0I9_PIG	Q9Y263	114 kDa	0.18	0.3
Uncharacterized protein OS=Sus scrofa OX=9823 GN=RAB11B PE=1 SV=1	tr|A0A5G2RBP9|A0A5G2RBP9_PIG		20 kDa	0.18	1.5
COP9 signalosome subunit 8 OS=Sus scrofa OX=9823 GN=COPS8 PE=1 SV=1	tr|A0A5G2RIY7|A0A5G2RIY7_PIG	Q99627	23 kDa	0.18	0.5
Actin, alpha cardiac muscle 1 OS=Sus scrofa OX=9823 GN=ACTC1 PE=2 SV=1	tr|B6VNT8|B6VNT8_PIG	P68032	42 kDa	0.18	0.8
Neurofilament light polypeptide OS=Sus scrofa OX=9823 GN=NEFL PE=1 SV=1	tr|F1RJU4|F1RJU4_PIG	P07196	62 kDa	0.18	INF
Exportin 5 OS=Sus scrofa OX=9823 GN=XPO5 PE=1 SV=3	tr|F1RRJ4|F1RRJ4_PIG	Q9HAV4	132 kDa	0.18	2.4
Annexin OS=Sus scrofa OX=9823 GN=ANXA5 PE=1 SV=4	tr|F2Z5C1|F2Z5C1_PIG	P08758	36 kDa	0.18	1.1
Eukaryotic translation initiation factor 4A2 OS=Sus scrofa OX=9823 GN=EIF4A2 PE=3 SV=2	tr|F6Q8Z7|F6Q8Z7_PIG	Q14240	47 kDa	0.18	1.4
Phosphodiesterase OS=Sus scrofa OX=9823 GN=PDE3A PE=1 SV=2	tr|I3L6S5|I3L6S5_PIG	Q14432	125 kDa	0.18	0.2
DJ-1 protein OS=Sus scrofa OX=9823 GN=PARK7 PE=1 SV=1	tr|Q0R678|Q0R678_PIG	Q99497	20 kDa	0.18	0.9
cAMP-dependent protein kinase type II-alpha regulatory subunit (Fragment) OS=Sus scrofa OX=9823 GN=PRKAR2A PE=1 SV=1	sp|P05207|KAP2_PIG	P13861	18 kDa	0.19	0.5
Peroxiredoxin-6 OS=Sus scrofa OX=9823 GN=PRDX6 PE=2 SV=3	sp|Q9TSX9|PRDX6_PIG	P30041	25 kDa	0.19	1.2
Reticulophagy regulator 1 OS=Sus scrofa OX=9823 GN=RETREG1 PE=1 SV=2	tr|A0A286ZIC0|A0A286ZIC0_PIG	Q9H6L5	62 kDa	0.19	0
Epsin 1 OS=Sus scrofa OX=9823 GN=EPN1 PE=4 SV=1	tr|A0A286ZY48|A0A286ZY48_PIG	Q9Y6I3	60 kDa	0.19	0.1
Sarcoglycan alpha OS=Sus scrofa OX=9823 GN=SGCA PE=1 SV=1	tr|A0A287AA20|A0A287AA20_PIG (+1)	Q16586	43 kDa	0.19	0.4
Ubiquitin-like modifier OS=Sus scrofa OX=9823 GN=ISG15 PE=1 SV=1	tr|A0A287AB58|A0A287AB58_PIG	P05161	19 kDa	0.19	INF
Methionine adenosyltransferase 2 subunit beta OS=Sus scrofa OX=9823 GN=MAT2B PE=1 SV=1	tr|A0A287AEU6|A0A287AEU6_PIG	Q9NZL9	37 kDa	0.19	3.6
Reticulon 4 interacting protein 1 OS=Sus scrofa OX=9823 GN=RTN4IP1 PE=1 SV=2	tr|A0A287BIM5|A0A287BIM5_PIG (+1)	Q8WWV3	50 kDa	0.19	0
Tubulin beta chain OS=Sus scrofa OX=9823 PE=1 SV=1	tr|A0A5G2R693|A0A5G2R693_PIG	P07437	57 kDa	0.19	2.2
Eukaryotic translation initiation factor 4E OS=Sus scrofa OX=9823 GN=EIF4E PE=1 SV=1	tr|A0A5G2RC36|A0A5G2RC36_PIG	P06730	25 kDa	0.19	0.3
Actin-related protein 2/3 complex subunit 3 OS=Sus scrofa OX=9823 GN=ARPC3 PE=1 SV=1	tr|B5APU8|B5APU8_PIG	O15145	21 kDa	0.19	3.6
NADH dehydrogenase [ubiquinone] 1 alpha subcomplex subunit 2 OS=Sus scrofa OX=9823 GN=NDUFA2 PE=1 SV=1	tr|F1RGE3|F1RGE3_PIG	O43678	11 kDa	0.19	1.4
Sacchrp_dh_NADP domain-containing protein OS=Sus scrofa OX=9823 GN=SCCPDH PE=1 SV=3	tr|F1S8P1|F1S8P1_PIG	Q8NBX0	47 kDa	0.19	0
Uncharacterized protein OS=Sus scrofa OX=9823 GN=HRG PE=4 SV=3	tr|F1SFI5|F1SFI5_PIG		62 kDa	0.19	0.8
Twinfilin actin binding protein 2 OS=Sus scrofa OX=9823 GN=TWF2 PE=1 SV=2	tr|F1SIX7|F1SIX7_PIG	Q6IBS0	55 kDa	0.19	3.7
Uncharacterized protein OS=Sus scrofa OX=9823 GN=ECE2 PE=1 SV=3	tr|I3LQT3|I3LQT3_PIG		181 kDa	0.19	1.5
Four and a half LIM domains 1 OS=Sus scrofa OX=9823 GN=FHL1 PE=4 SV=3	tr|K7GLQ8|K7GLQ8_PIG	Q13642	40 kDa	0.19	1.4
Destrin OS=Sus scrofa OX=9823 GN=DSTN PE=1 SV=3	sp|P60982|DEST_PIG	P60981	19 kDa	0.2	1.5
Mitochondrial fission 1 protein OS=Sus scrofa OX=9823 GN=FIS1 PE=1 SV=1	tr|A0A287ADK7|A0A287ADK7_PIG	Q9Y3D6	17 kDa	0.2	0.4
Synaptotagmin binding cytoplasmic RNA interacting protein OS=Sus scrofa OX=9823 GN=SYNCRIP PE=1 SV=1	tr|A0A287BGU5|A0A287BGU5_PIG	O60506	63 kDa	0.2	1.4
Adducin 3 OS=Sus scrofa OX=9823 GN=ADD3 PE=1 SV=1	tr|A0A287BSU1|A0A287BSU1_PIG	Q9UEY8	75 kDa	0.2	0.3
Cytochrome c oxidase subunit 7A2 like OS=Sus scrofa OX=9823 GN=COX7A2L PE=1 SV=1	tr|A0A287BTB8|A0A287BTB8_PIG	O14548	16 kDa	0.2	0.3
UBA domain containing 1 OS=Sus scrofa OX=9823 GN=UBAC1 PE=4 SV=1	tr|A0A480TXY7|A0A480TXY7_PIG	Q9BSL1	52 kDa	0.2	0
AP complex subunit beta OS=Sus scrofa OX=9823 GN=AP2B1 PE=1 SV=1	tr|A0A480V1M7|A0A480V1M7_PIG (+1)	P63010	106 kDa	0.2	2.7
Uncharacterized protein OS=Sus scrofa OX=9823 PE=4 SV=1	tr|A0A5G2QK97|A0A5G2QK97_PIG		114 kDa	0.2	0.2
Histidine rich calcium binding protein OS=Sus scrofa OX=9823 GN=HRC PE=1 SV=1	tr|A0A5G2QRX8|A0A5G2QRX8_PIG (+1)	P23327	68 kDa	0.2	0.5
Reticulocalbin 2 OS=Sus scrofa OX=9823 GN=RCN2 PE=1 SV=1	tr|A0A5G2QY21|A0A5G2QY21_PIG	Q14257	25 kDa	0.2	0
Dihydropteridine reductase OS=Sus scrofa OX=9823 GN=QDPR PE=4 SV=1	tr|A0A5G2QZN1|A0A5G2QZN1_PIG	P09417	22 kDa	0.2	1.4
Eukaryotic translation initiation factor 6 OS=Sus scrofa OX=9823 GN=EIF6 PE=1 SV=1	tr|A0A5G2R117|A0A5G2R117_PIG (+1)	P56537	27 kDa	0.2	2.9
Sorting nexin 3 OS=Sus scrofa OX=9823 GN=SNX3 PE=1 SV=1	tr|A0A5G2R4Z1|A0A5G2R4Z1_PIG	O60493	19 kDa	0.2	0.4
Eukaryotic translation initiation factor 2 subunit beta OS=Sus scrofa OX=9823 GN=EIF2S2 PE=4 SV=2	tr|F1S4Y8|F1S4Y8_PIG	P20042	38 kDa	0.2	0.4
AAA domain-containing protein OS=Sus scrofa OX=9823 GN=PSMC2 PE=1 SV=2	tr|F1SB53|F1SB53_PIG	P35998	49 kDa	0.2	0.5
Plasminogen activator inhibitor 2 OS=Sus scrofa OX=9823 GN=SERPINB2 PE=1 SV=2	tr|F1SMW7|F1SMW7_PIG	P05120	49 kDa	0.2	1.3
Mitochondrial intermembrane space import and assembly protein 40 isoform 1 OS=Sus scrofa OX=9823 GN=CHCHD4 PE=4 SV=1	tr|F1SPI0|F1SPI0_PIG	Q8N4Q1	15 kDa	0.2	0
Y-box binding protein 3 OS=Sus scrofa OX=9823 GN=YBX3 PE=1 SV=2	tr|F1SQ46|F1SQ46_PIG	P16989	33 kDa	0.2	1.6
Hemoglobin subunit beta OS=Sus scrofa OX=9823 GN=HBB PE=1 SV=3	sp|P02067|HBB_PIG	P68871	16 kDa	0.21	1.4
Signal transducer and activator of transcription 3 OS=Sus scrofa OX=9823 GN=STAT3 PE=1 SV=1	sp|Q19S50|STAT3_PIG	O95218	88 kDa	0.21	INF
Myosin-7 OS=Sus scrofa OX=9823 GN=MYH7 PE=1 SV=2	tr|A0A286ZXE3|A0A286ZXE3_PIG (+2)	P12883	226 kDa	0.21	4.3
Ro60, Y RNA binding protein OS=Sus scrofa OX=9823 GN=RO60 PE=1 SV=1	tr|A0A287B6J4|A0A287B6J4_PIG	P10155	60 kDa	0.21	1.6
Tropomyosin alpha-1 chain OS=Sus scrofa OX=9823 GN=TPM1 PE=1 SV=2	tr|A0A287BHM1|A0A287BHM1_PIG	P09493	35 kDa	0.21	1.2
40S ribosomal protein S24 OS=Sus scrofa OX=9823 GN=RPS24 PE=1 SV=1	tr|A0A5G2QXQ1|A0A5G2QXQ1_PIG (+2)	P62847	15 kDa	0.21	2.2
Latent transforming growth factor beta binding protein 4 OS=Sus scrofa OX=9823 GN=LTBP4 PE=1 SV=1	tr|A0A5G2R0I5|A0A5G2R0I5_PIG	Q8N2S1	173 kDa	0.21	0.5
Formin homology 2 domain containing 3 OS=Sus scrofa OX=9823 GN=FHOD3 PE=4 SV=1	tr|A0A5G2R9A4|A0A5G2R9A4_PIG (+1)	Q2V2M9	172 kDa	0.21	0
Fibrinogen alpha chain OS=Sus scrofa OX=9823 GN=FGA PE=1 SV=4	tr|F1RX36|F1RX36_PIG	P02671	101 kDa	0.21	1.7
SERPIN domain-containing protein OS=Sus scrofa OX=9823 GN=LOC106504545 PE=1 SV=2	tr|F1SCC9|F1SCC9_PIG	Not present in human	46 kDa	0.21	0.7
Retinol dehydrogenase 14 OS=Sus scrofa OX=9823 GN=RDH14 PE=1 SV=1	tr|F1SCT9|F1SCT9_PIG	Q9HBH5	37 kDa	0.21	0.3
40S ribosomal protein S9 OS=Sus scrofa OX=9823 GN=RPS9 PE=1 SV=3	tr|I3LEX0|I3LEX0_PIG	P46781	23 kDa	0.21	2.2
Glucose-6-phosphate isomerase OS=Sus scrofa OX=9823 GN=GPI PE=1 SV=3	sp|P08059|G6PI_PIG	P06744	63 kDa	0.22	1.3
Glutaredoxin-1 OS=Sus scrofa OX=9823 GN=GLRX PE=1 SV=2	sp|P12309|GLRX1_PIG	P35754	12 kDa	0.22	0.7
Troponin C, slow skeletal and cardiac muscles OS=Sus scrofa OX=9823 GN=TNNC1 PE=1 SV=1	sp|P63317|TNNC1_PIG	P63316	18 kDa	0.22	0.7
LIM domain 7 OS=Sus scrofa OX=9823 GN=LMO7 PE=1 SV=2	tr|A0A286ZVE6|A0A286ZVE6_PIG	Q8WWI1	182 kDa	0.22	0.7
Spectrin alpha, non-erythrocytic 1 OS=Sus scrofa OX=9823 GN=SPTAN1 PE=1 SV=1	tr|A0A286ZXS0|A0A286ZXS0_PIG	Q13813	275 kDa	0.22	0.8
Nuclear transport factor 2 OS=Sus scrofa OX=9823 GN=NUTF2 PE=1 SV=1	tr|A0A287A021|A0A287A021_PIG	P61970	12 kDa	0.22	1.4
Short-chain-specific acyl-CoA dehydrogenase, mitochondrial OS=Sus scrofa OX=9823 GN=ACADS PE=3 SV=2	tr|A0A287A8Y8|A0A287A8Y8_PIG	P16219	67 kDa	0.22	1.2
Protein phosphatase 6 regulatory subunit 3 OS=Sus scrofa OX=9823 GN=PPP6R3 PE=1 SV=1	tr|A0A287AJG5|A0A287AJG5_PIG (+2)	Q5H9R7	98 kDa	0.22	0
Protein phosphatase 1 regulatory subunit 13 like OS=Sus scrofa OX=9823 GN=PPP1R13L PE=4 SV=2	tr|A0A287B1L3|A0A287B1L3_PIG	Q8WUF5	86 kDa	0.22	0.3
Ubiquitin-conjugating enzyme E2 D3 isoform 2 OS=Sus scrofa OX=9823 GN=UBE2D3 PE=3 SV=1	tr|A0A288CFV1|A0A288CFV1_PIG (+1)	P61077	17 kDa	0.22	0.2
Integrin subunit alpha 5 OS=Sus scrofa OX=9823 GN=ITGA5 PE=1 SV=1	tr|A0A5G2QK84|A0A5G2QK84_PIG (+1)	P08648	115 kDa	0.22	0.7
Prothymosin alpha OS=Sus scrofa OX=9823 GN=PTMA PE=1 SV=1	tr|A0A5G2RFE7|A0A5G2RFE7_PIG	P06454	14 kDa	0.22	3.4
Tetraspanin OS=Sus scrofa OX=9823 GN=CD81 PE=1 SV=1	tr|A0A5G2RMT1|A0A5G2RMT1_PIG	P60033	28 kDa	0.22	3.7
Telethonin OS=Sus scrofa OX=9823 GN=TCAP PE=4 SV=1	tr|A4GR69|A4GR69_PIG	O15273	19 kDa	0.22	0.5
HATPase_c domain-containing protein OS=Sus scrofa OX=9823 GN=TRAP1 PE=1 SV=3	tr|F1RK45|F1RK45_PIG	Q12931	81 kDa	0.22	0.6
Uncharacterized protein OS=Sus scrofa OX=9823 GN=CKAP4 PE=1 SV=3	tr|F1SPP8|F1SPP8_PIG		65 kDa	0.22	1.6
Lumican OS=Sus scrofa OX=9823 GN=LUM PE=1 SV=1	tr|F1SQ09|F1SQ09_PIG	P51884	39 kDa	0.22	1.2
Uncharacterized protein OS=Sus scrofa OX=9823 GN=ADPRHL1 PE=1 SV=2	tr|I3L9N1|I3L9N1_PIG		31 kDa	0.22	1.5
Poly [ADP-ribose] polymerase OS=Sus scrofa OX=9823 GN=PARP1 PE=1 SV=3	tr|I3LDH3|I3LDH3_PIG	P09874	113 kDa	0.22	INF
Uncharacterized protein OS=Sus scrofa OX=9823 GN=AHNAK PE=1 SV=2	tr|A0A287A608|A0A287A608_PIG		236 kDa	0.23	1.3
Uncharacterized protein OS=Sus scrofa OX=9823 GN=MYZAP PE=1 SV=1	tr|A0A287AXD1|A0A287AXD1_PIG		50 kDa	0.23	0.5
Muscular LMNA interacting protein OS=Sus scrofa OX=9823 GN=MLIP PE=1 SV=2	tr|A0A287BJF8|A0A287BJF8_PIG	Q5VWP3	96 kDa	0.23	0.7
Glucose-6-phosphate 1-dehydrogenase OS=Sus scrofa OX=9823 GN=G6PD PE=1 SV=1	tr|A0A287BSL9|A0A287BSL9_PIG	P11413	72 kDa	0.23	3.1
Transforming growth factor-beta-induced protein ig-h3 OS=Sus scrofa OX=9823 GN=TGFBI PE=1 SV=1	tr|A0A5G2QXN3|A0A5G2QXN3_PIG	Q15582	74 kDa	0.23	1.7
Transport and golgi organization 2 homolog OS=Sus scrofa OX=9823 GN=TANGO2 PE=1 SV=1	tr|A0A5G2R7J9|A0A5G2R7J9_PIG	Q6ICL3	34 kDa	0.23	3.1
Acyl-CoA dehydrogenase short/branched chain OS=Sus scrofa OX=9823 GN=ACADSB PE=1 SV=4	tr|F1SED0|F1SED0_PIG	P45954	47 kDa	0.23	1.3
Cytochrome c oxidase subunit 5A OS=Sus scrofa OX=9823 GN=COX5A PE=1 SV=1	tr|F1SJ34|F1SJ34_PIG	P20674	17 kDa	0.23	0.9
MICOS complex subunit OS=Sus scrofa OX=9823 GN=APOO PE=1 SV=1	tr|K7GPW3|K7GPW3_PIG	Q9BUR5	22 kDa	0.23	0.7
Serine/arginine-rich splicing factor 2 OS=Sus scrofa OX=9823 GN=SRSF2 PE=2 SV=1	sp|Q06A98|SRSF2_PIG	Q01130	25 kDa	0.24	1.8
Succinyl-CoA:3-ketoacid coenzyme A transferase 1, mitochondrial OS=Sus scrofa OX=9823 GN=OXCT1 PE=1 SV=2	sp|Q29551|SCOT1_PIG	P55809	56 kDa	0.24	1.3
Malic enzyme OS=Sus scrofa OX=9823 GN=ME2 PE=1 SV=1	tr|A0A286ZNS2|A0A286ZNS2_PIG	P23368	76 kDa	0.24	1.5
Glycogenin 1 OS=Sus scrofa OX=9823 GN=GYG1 PE=1 SV=1	tr|A0A286ZUI9|A0A286ZUI9_PIG	P46976	37 kDa	0.24	1.2
Synaptopodin 2 OS=Sus scrofa OX=9823 GN=SYNPO2 PE=1 SV=1	tr|A0A287AUH9|A0A287AUH9_PIG	Q9UMS6	136 kDa	0.24	0.6
Histone-lysine N-methyltransferase SMYD1 isoform 1 OS=Sus scrofa OX=9823 GN=SMYD1 PE=1 SV=1	tr|A0A287B1U8|A0A287B1U8_PIG	Q8NB12	57 kDa	0.24	1.4
V-SNARE coiled-coil homology domain-containing protein OS=Sus scrofa OX=9823 GN=VAMP3 PE=1 SV=1	tr|A0A5G2R1F8|A0A5G2R1F8_PIG	Q15836	24 kDa	0.24	3.2
Beta-enolase OS=Sus scrofa OX=9823 GN=ENO3 PE=1 SV=1	tr|A0A5G2R7R6|A0A5G2R7R6_PIG	P13929	47 kDa	0.24	1.3
Fibrinogen beta chain OS=Sus scrofa OX=9823 GN=FGB PE=1 SV=1	tr|A0A5G2RHA4|A0A5G2RHA4_PIG	P02675	56 kDa	0.24	1.9
Na(+)/H(+) exchange regulatory cofactor NHE-RF OS=Sus scrofa OX=9823 GN=SLC9A3R2 PE=1 SV=1	tr|B6EAV5|B6EAV5_PIG	Q15599	37 kDa	0.24	0.4
Acyl-CoA dehydrogenase family member 10 OS=Sus scrofa OX=9823 GN=ACAD10 PE=4 SV=4	tr|F1RL48|F1RL48_PIG	Q6JQN1	116 kDa	0.24	0.7
Elastin microfibril interfacer 2 OS=Sus scrofa OX=9823 GN=EMILIN2 PE=1 SV=3	tr|F1SBC8|F1SBC8_PIG	Q9BXX0	118 kDa	0.24	1.8
Tubulin beta chain OS=Sus scrofa OX=9823 GN=TUBB4A PE=1 SV=2	tr|F2Z5K5|F2Z5K5_PIG	P04350	50 kDa	0.24	0.4
40S ribosomal protein S6 OS=Sus scrofa OX=9823 GN=RPS6 PE=1 SV=4	tr|F2Z5Q6|F2Z5Q6_PIG	P62753	29 kDa	0.24	1.9
FABP domain-containing protein OS=Sus scrofa OX=9823 GN=FABP5 PE=1 SV=1	tr|F6PVY0|F6PVY0_PIG	Q01469	26 kDa	0.24	0.6
Signal transducer and activator of transcription OS=Sus scrofa OX=9823 GN=STAT1 PE=1 SV=1	tr|G9BFU0|G9BFU0_PIG	P42224	88 kDa	0.24	1.9
Integrin beta OS=Sus scrofa OX=9823 GN=ITGB1 PE=3 SV=2	tr|K7GS94|K7GS94_PIG	P05556	94 kDa	0.24	0.7
Tryptophan--tRNA ligase, cytoplasmic OS=Sus scrofa OX=9823 GN=WARS1 PE=1 SV=1	tr|K9IVV5|K9IVV5_PIG	P23381	54 kDa	0.24	2.7
40S ribosomal protein S20 OS=Sus scrofa OX=9823 GN=RPS20 PE=1 SV=1	sp|A1XQU9|RS20_PIG (+1)	P60866	13 kDa	0.25	0.3
Alpha-1-antitrypsin OS=Sus scrofa OX=9823 GN=SERPINA1 PE=2 SV=1	sp|P50447|A1AT_PIG	P01009	47 kDa	0.25	0.7
Actin, alpha skeletal muscle OS=Sus scrofa OX=9823 GN=ACTA1 PE=1 SV=1	sp|P68137|ACTS_PIG	P68133	42 kDa	0.25	1.4
Flotillin-1 OS=Sus scrofa OX=9823 GN=FLOT1 PE=3 SV=1	sp|Q767L6|FLOT1_PIG	O75955	47 kDa	0.25	0.2
Complement C1q binding protein OS=Sus scrofa OX=9823 GN=C1QBP PE=2 SV=1	tr|A0A0D5BWD2|A0A0D5BWD2_PIG (+1)	Q07021	31 kDa	0.25	0.6
Regulator of microtubule dynamics 1 OS=Sus scrofa OX=9823 GN=RMDN1 PE=4 SV=2	tr|A0A286ZK35|A0A286ZK35_PIG	Q96DB5	39 kDa	0.25	1.4
Ribosomal protein L15 OS=Sus scrofa OX=9823 GN=RPL15 PE=1 SV=1	tr|A0A286ZL65|A0A286ZL65_PIG	P61313	24 kDa	0.25	3.1
Cytochrome c oxidase subunit OS=Sus scrofa OX=9823 GN=COX6A2 PE=1 SV=1	tr|A0A287AEB7|A0A287AEB7_PIG	Q02221	11 kDa	0.25	1.4
Phosphoenolpyruvate carboxykinase 2, mitochondrial OS=Sus scrofa OX=9823 GN=PCK2 PE=1 SV=1	tr|A0A287AES5|A0A287AES5_PIG	Q16822	74 kDa	0.25	0.2
Thiosulfate sulfurtransferase like domain containing 1 OS=Sus scrofa OX=9823 GN=TSTD1 PE=1 SV=1	tr|A0A5G2QBU0|A0A5G2QBU0_PIG	Q8NFU3	12 kDa	0.25	3.1
Eukaryotic translation initiation factor 3 subunit A OS=Sus scrofa OX=9823 GN=EIF3A PE=1 SV=1	tr|A0A5G2QS02|A0A5G2QS02_PIG (+1)	Q14152	165 kDa	0.25	3.1
Ubiquinone biosynthesis protein OS=Sus scrofa OX=9823 GN=COQ9 PE=1 SV=1	tr|A0A5G2QS58|A0A5G2QS58_PIG	O75208	44 kDa	0.25	0.8
Myosin heavy chain 3 OS=Sus scrofa OX=9823 GN=MYH3 PE=1 SV=1	tr|A0A5G2QTZ6|A0A5G2QTZ6_PIG	P11055	228 kDa	0.25	0.6
Cathepsin B OS=Sus scrofa OX=9823 GN=CTSB PE=1 SV=1	tr|A0A5S6GR81|A0A5S6GR81_PIG	P07858	46 kDa	0.25	2.6
Uncharacterized protein OS=Sus scrofa OX=9823 GN=EFHD2 PE=1 SV=1	tr|F1SUW3|F1SUW3_PIG		27 kDa	0.25	1.4
Actin related protein 1A OS=Sus scrofa OX=9823 GN=ACTR1A PE=1 SV=2	tr|F2Z5G5|F2Z5G5_PIG	P61163	39 kDa	0.25	1.4
Cystatin C OS=Sus scrofa OX=9823 GN=CST3 PE=1 SV=1	tr|Q0Z8R0|Q0Z8R0_PIG	P01034	16 kDa	0.25	0.4
Resistin OS=Sus scrofa OX=9823 GN=RETN PE=1 SV=1	tr|Q6QR67|Q6QR67_PIG	Q9HD89	12 kDa	0.25	0.3
Ig-like domain-containing protein OS=Sus scrofa OX=9823 PE=4 SV=7	tr|A0A075B7H9|A0A075B7H9_PIG	Not present in human	11 kDa	0.26	0.6
Acyl-coenzyme A oxidase OS=Sus scrofa OX=9823 GN=ACOX1 PE=1 SV=2	tr|A0A286ZSR3|A0A286ZSR3_PIG	Q15067	74 kDa	0.26	0
Calnexin OS=Sus scrofa OX=9823 GN=CANX PE=1 SV=2	tr|A0A286ZSW6|A0A286ZSW6_PIG	P27824	68 kDa	0.26	1.1
Kinesin light chain OS=Sus scrofa OX=9823 GN=KLC1 PE=1 SV=2	tr|A0A286ZWY6|A0A286ZWY6_PIG	Q07866	70 kDa	0.26	0.2
Uncharacterized protein OS=Sus scrofa OX=9823 GN=LOC100739163 PE=1 SV=2	tr|A0A287AZ91|A0A287AZ91_PIG		32 kDa	0.26	1.2
Glycerol-3-phosphate dehydrogenase [NAD(+)] OS=Sus scrofa OX=9823 GN=GPD1 PE=1 SV=2	tr|A0A287BDV9|A0A287BDV9_PIG	P21695	38 kDa	0.26	1.7
Tight junction protein 1 OS=Sus scrofa OX=9823 GN=TJP1 PE=1 SV=2	tr|A0A287BF71|A0A287BF71_PIG	Q07157	207 kDa	0.26	0.4
Nucleosome assembly protein 1 like 1 OS=Sus scrofa OX=9823 GN=NAP1L1 PE=1 SV=1	tr|F1SGD7|F1SGD7_PIG	P55209	45 kDa	0.26	1.6
High mobility group protein B1 OS=Sus scrofa OX=9823 GN=HMGB1 PE=4 SV=3	tr|F2Z594|F2Z594_PIG	P09429	25 kDa	0.26	1.7
Enolase 2 OS=Sus scrofa OX=9823 GN=ENO2 PE=3 SV=2	tr|I3LCN1|I3LCN1_PIG	P09104	47 kDa	0.26	1.8
Uncharacterized protein OS=Sus scrofa OX=9823 GN=IGBP1 PE=4 SV=1	tr|K7GQ35|K7GQ35_PIG		39 kDa	0.26	2.6
Thioredoxin OS=Sus scrofa OX=9823 GN=TXN PE=1 SV=3	sp|P82460|THIO_PIG	P10599	12 kDa	0.27	0.4
CRK proto-oncogene, adaptor protein OS=Sus scrofa OX=9823 GN=CRK PE=1 SV=2	tr|A0A286ZTD8|A0A286ZTD8_PIG	P46108	42 kDa	0.27	2
Afamin OS=Sus scrofa OX=9823 GN=AFM PE=1 SV=1	tr|A0A287A363|A0A287A363_PIG (+3)	P43652	70 kDa	0.27	0.07
Chloride intracellular channel protein OS=Sus scrofa OX=9823 GN=CLIC4 PE=1 SV=1	tr|A0A287ADH9|A0A287ADH9_PIG	Q9Y696	29 kDa	0.27	1.3
Alpha-1,4 glucan phosphorylase OS=Sus scrofa OX=9823 GN=PYGB PE=1 SV=2	tr|A0A287AL55|A0A287AL55_PIG (+1)	P35573	92 kDa	0.27	1.3
Uncharacterized protein OS=Sus scrofa OX=9823 GN=CDH13 PE=1 SV=1	tr|A0A5G2QF74|A0A5G2QF74_PIG		80 kDa	0.27	0.6
Serpin family F member 2 OS=Sus scrofa OX=9823 GN=SERPINF2 PE=1 SV=1	tr|A0A5G2QN21|A0A5G2QN21_PIG	P08697	60 kDa	0.27	0.4
Supervillin OS=Sus scrofa OX=9823 GN=SVIL PE=4 SV=3	tr|F1RWD9|F1RWD9_PIG	O95425	246 kDa	0.27	0.4
HIG1 domain family member 1A, mitochondrial isoform a OS=Sus scrofa OX=9823 GN=HIGD1A PE=4 SV=1	tr|F1SRE7|F1SRE7_PIG	Q9Y241	10 kDa	0.27	0.2
Myosin light chain 12A OS=Sus scrofa OX=9823 GN=MYL12A PE=1 SV=2	tr|F2Z5V6|F2Z5V6_PIG	P19105	21 kDa	0.27	0.8
3-hydroxy-3-methylglutaryl-CoA lyase OS=Sus scrofa OX=9823 GN=HMGCL PE=4 SV=3	tr|I3LIL5|I3LIL5_PIG	P35914	40 kDa	0.27	0.7
Phosphoacetylglucosamine mutase OS=Sus scrofa OX=9823 GN=PGM3 PE=1 SV=2	sp|F1RQM2|AGM1_PIG	O95394	59 kDa	0.28	2.4
Lambda-crystallin homolog OS=Sus scrofa OX=9823 GN=CRYL1 PE=2 SV=3	sp|Q8SQ26|CRYL1_PIG	Q9Y2S2	35 kDa	0.28	0.2
Uncharacterized protein OS=Sus scrofa OX=9823 PE=4 SV=2	tr|A0A286ZJL9|A0A286ZJL9_PIG		53 kDa	0.28	2
T-complex protein 1 subunit gamma OS=Sus scrofa OX=9823 GN=CCT3 PE=1 SV=1	tr|A0A287AMZ2|A0A287AMZ2_PIG	P49368	61 kDa	0.28	1.4
Phosphoglycolate phosphatase OS=Sus scrofa OX=9823 GN=PGP PE=1 SV=1	tr|A0A287BDT8|A0A287BDT8_PIG	A6NDG6	34 kDa	0.28	1.4
Heterogeneous nuclear ribonucleoprotein D OS=Sus scrofa OX=9823 GN=HNRNPD PE=1 SV=1	tr|A0A480M1B4|A0A480M1B4_PIG	Q14103	33 kDa	0.28	0.8
Dysferlin OS=Sus scrofa OX=9823 GN=DYSF PE=1 SV=1	tr|A0A5G2QPQ0|A0A5G2QPQ0_PIG (+1)	O75923	239 kDa	0.28	0.4
Sec1 family domain containing 1 OS=Sus scrofa OX=9823 GN=SCFD1 PE=1 SV=1	tr|A0A5G2R8F9|A0A5G2R8F9_PIG	Q8WVM8	66 kDa	0.28	0.4
Leucine carboxyl methyltransferase 1 OS=Sus scrofa OX=9823 GN=LCMT1 PE=1 SV=3	tr|F1RFE3|F1RFE3_PIG	Q9UIC8	38 kDa	0.28	2.2
Reticulon OS=Sus scrofa OX=9823 GN=RTN3 PE=1 SV=3	tr|F1RPY3|F1RPY3_PIG	O95197	27 kDa	0.28	0.6
AB hydrolase-1 domain-containing protein OS=Sus scrofa OX=9823 GN=BPHL PE=1 SV=4	tr|F1RWY7|F1RWY7_PIG	Q86WA6	34 kDa	0.28	1.4
Tubulin polymerization promoting protein family member 3 OS=Sus scrofa OX=9823 GN=TPPP3 PE=4 SV=2	tr|F1S2I8|F1S2I8_PIG	Q9BW30	19 kDa	0.28	0.7
Haloacid dehalogenase like hydrolase domain containing 5 OS=Sus scrofa OX=9823 GN=HDHD5 PE=1 SV=3	tr|F1SHR6|F1SHR6_PIG	Q9BXW7	45 kDa	0.28	1.4
Crystallin beta-gamma domain containing 3 OS=Sus scrofa OX=9823 GN=CRYBG3 PE=1 SV=2	tr|I3LUY9|I3LUY9_PIG	Q68DQ2	328 kDa	0.28	0
Serine/threonine-protein phosphatase 2A 65 kDa regulatory subunit A alpha isoform OS=Sus scrofa OX=9823 GN=PPP2R1A PE=2 SV=2	sp|P54612|2AAA_PIG	P30153	65 kDa	0.29	1.1
Electron transfer flavoprotein subunit alpha OS=Sus scrofa OX=9823 GN=ETFA PE=1 SV=1	tr|A0A287A4T2|A0A287A4T2_PIG	P13804	35 kDa	0.29	0.8
Aldehyde dehydrogenase 7 family member A1 OS=Sus scrofa OX=9823 GN=ALDH7A1 PE=1 SV=1	tr|A0A287ADK3|A0A287ADK3_PIG	P49419	55 kDa	0.29	0.4
Torsin 1A interacting protein 1 OS=Sus scrofa OX=9823 GN=TOR1AIP1 PE=1 SV=1	tr|A0A287B642|A0A287B642_PIG	Q5JTV8	67 kDa	0.29	0.6
PC4 and SFRS1 interacting protein 1 OS=Sus scrofa OX=9823 GN=PSIP1 PE=1 SV=2	tr|A0A287BE52|A0A287BE52_PIG	O75475	60 kDa	0.29	0.3
Histone H2B OS=Sus scrofa OX=9823 GN=HIST1H1D PE=1 SV=1	tr|A0A5G2QML3|A0A5G2QML3_PIG	P06899	33 kDa	0.29	1.3
SGT1 homolog, MIS12 kinetochore complex assembly cochaperone OS=Sus scrofa OX=9823 GN=SUGT1 PE=1 SV=1	tr|A0A5G2QN18|A0A5G2QN18_PIG	Q9Y2Z0	38 kDa	0.29	1.8
Glutathione S-transferase zeta 1 OS=Sus scrofa OX=9823 GN=GSTZ1 PE=1 SV=1	tr|A0A5K1UWY1|A0A5K1UWY1_PIG	O43708	24 kDa	0.29	1.3
NADH dehydrogenase [ubiquinone] iron-sulfur protein 6, mitochondrial OS=Sus scrofa OX=9823 GN=NDUFS6 PE=1 SV=1	tr|F1S031|F1S031_PIG	O75380	13 kDa	0.29	0.6
Heparan sulfate proteoglycan 2 OS=Sus scrofa OX=9823 GN=HSPG2 PE=1 SV=4	tr|F1SU03|F1SU03_PIG	P98160	462 kDa	0.29	0.7
Small nuclear ribonucleoprotein Sm D1 OS=Sus scrofa OX=9823 GN=SNRPD1 PE=1 SV=1	tr|F2Z5G9|F2Z5G9_PIG	P62314	13 kDa	0.29	2.8
Ribosomal protein L24 OS=Sus scrofa OX=9823 GN=RPL24 PE=1 SV=3	tr|F2Z5Q2|F2Z5Q2_PIG	P83731	18 kDa	0.29	1.4
Uncharacterized protein OS=Sus scrofa OX=9823 GN=PCBD2 PE=3 SV=3	tr|I3LUU1|I3LUU1_PIG		36 kDa	0.29	0.5
Anion exchange protein OS=Sus scrofa OX=9823 GN=SLC4A1 PE=1 SV=1	tr|K7GR72|K7GR72_PIG	P02730	104 kDa	0.29	1.4
Alpha-1B-glycoprotein OS=Sus scrofa OX=9823 GN=A1BG PE=1 SV=1	tr|A0A286ZUY9|A0A286ZUY9_PIG (+1)	P04217	75 kDa	0.3	0.7
Uncharacterized protein OS=Sus scrofa OX=9823 GN=HNRNPAB PE=1 SV=1	tr|A0A287BMB6|A0A287BMB6_PIG (+2)		37 kDa	0.3	0.8
Uncharacterized protein OS=Sus scrofa OX=9823 GN=SET PE=1 SV=1	tr|A0A5G2QBC5|A0A5G2QBC5_PIG		41 kDa	0.3	0.8
NAD(P)H-hydrate epimerase OS=Sus scrofa OX=9823 GN=NAXE PE=1 SV=1	tr|A0A5G2QPA8|A0A5G2QPA8_PIG	Q8NCW5	42 kDa	0.3	0.5
Rab GDP dissociation inhibitor OS=Sus scrofa OX=9823 GN=GDI2 PE=1 SV=1	tr|A0A5G2QSK4|A0A5G2QSK4_PIG	P50395	51 kDa	0.3	1.3
Vacuolar protein sorting-associated protein 35 OS=Sus scrofa OX=9823 GN=VPS35 PE=1 SV=1	tr|A0A5G2QTZ1|A0A5G2QTZ1_PIG	Q96QK1	84 kDa	0.3	1.9
Uncharacterized protein OS=Sus scrofa OX=9823 PE=1 SV=1	tr|A0A5G2QXT5|A0A5G2QXT5_PIG		54 kDa	0.3	0.9
Profilin OS=Sus scrofa OX=9823 GN=PFN1 PE=1 SV=1	tr|A0A5G2R9A9|A0A5G2R9A9_PIG	P07737	19 kDa	0.3	1.3
E3 ubiquitin-protein ligase HUWE1 isoform X9 OS=Sus scrofa OX=9823 GN=HUWE1 PE=1 SV=2	tr|F1RUH0|F1RUH0_PIG	Q7Z6Z7	486 kDa	0.3	0.5
Sorcin OS=Sus scrofa OX=9823 GN=SRI PE=1 SV=1	tr|F1S340|F1S340_PIG	P30626	22 kDa	0.3	2.6
Pyridine nucleotide-disulphide oxidoreductase domain 2 OS=Sus scrofa OX=9823 GN=PYROXD2 PE=1 SV=3	tr|F1S8W9|F1S8W9_PIG	Q8N2H3	63 kDa	0.3	0.5
Uncharacterized protein OS=Sus scrofa OX=9823 GN=NDUFS5 PE=1 SV=1	tr|F1SV23|F1SV23_PIG		12 kDa	0.3	1.2
Fatty acid transport protein 1a OS=Sus scrofa OX=9823 GN=SLC27A1 PE=1 SV=1	tr|Q3HUX0|Q3HUX0_PIG	Q6PCB7	71 kDa	0.3	0.3
Ras-related protein Rab-1B OS=Sus scrofa OX=9823 GN=KLC2 PE=4 SV=2	tr|A0A286ZJ53|A0A286ZJ53_PIG	Q9H0U4	36 kDa	0.31	1.4
Malignant T-cell-amplified sequence OS=Sus scrofa OX=9823 GN=LOC100738684 PE=1 SV=1	tr|A0A286ZJU5|A0A286ZJU5_PIG	Q9ULC4	21 kDa	0.31	0.2
PDZ domain-containing protein OS=Sus scrofa OX=9823 PE=1 SV=1	tr|A0A286ZN89|A0A286ZN89_PIG (+3)	Not present in human	16 kDa	0.31	1.3
COP9 signalosome subunit 2 OS=Sus scrofa OX=9823 GN=COPS2 PE=1 SV=1	tr|A0A286ZPI3|A0A286ZPI3_PIG (+1)	P61201	46 kDa	0.31	1.6
Serum albumin OS=Sus scrofa OX=9823 GN=ALB PE=1 SV=1	tr|A0A286ZT13|A0A286ZT13_PIG	P02768	68 kDa	0.31	0.6
Heterogeneous nuclear ribonucleoprotein U OS=Sus scrofa OX=9823 GN=HNRNPU PE=1 SV=1	tr|A0A286ZVL0|A0A286ZVL0_PIG	Q00839	91 kDa	0.31	1.2
GrpE protein homolog OS=Sus scrofa OX=9823 GN=GRPEL1 PE=1 SV=2	tr|A0A287AD92|A0A287AD92_PIG	Q9HAV7	24 kDa	0.31	1.5
Four and a half LIM domains 2 OS=Sus scrofa OX=9823 GN=FHL2 PE=1 SV=2	tr|A0A287AH53|A0A287AH53_PIG (+1)	Q14192	32 kDa	0.31	0.6
Amylo-alpha-1, 6-glucosidase, 4-alpha-glucanotransferase OS=Sus scrofa OX=9823 GN=AGL PE=4 SV=2	tr|A0A287AXA8|A0A287AXA8_PIG	P35573	175 kDa	0.31	1.3
RNA binding motif protein 39 OS=Sus scrofa OX=9823 GN=RBM39 PE=1 SV=1	tr|A0A287BAQ0|A0A287BAQ0_PIG	Q14498	59 kDa	0.31	0.5
Alanine aminotransferase 1 OS=Sus scrofa OX=9823 GN=GPT PE=1 SV=1	tr|A0A287BMB4|A0A287BMB4_PIG	P24298	61 kDa	0.31	0.9
Isoamyl acetate hydrolyzing esterase 1 (putative) OS=Sus scrofa OX=9823 GN=IAH1 PE=1 SV=1	tr|A0A287BPE6|A0A287BPE6_PIG	Q2TAA2	27 kDa	0.31	1.3
Uncharacterized protein OS=Sus scrofa OX=9823 GN=JPT2 PE=1 SV=1	tr|A0A5G2QK57|A0A5G2QK57_PIG		20 kDa	0.31	0.2
SERPIN domain-containing protein OS=Sus scrofa OX=9823 GN=SERPINB9 PE=1 SV=1	tr|A0A5G2R6M7|A0A5G2R6M7_PIG	P50453	54 kDa	0.31	0.3
Actin related protein 2/3 complex subunit 4 OS=Sus scrofa OX=9823 GN=ARPC4 PE=1 SV=1	tr|A0A5K1VDV6|A0A5K1VDV6_PIG (+1)	P59998	24 kDa	0.31	2.2
Ubiquitin thioesterase OS=Sus scrofa OX=9823 GN=OTUB1 PE=1 SV=1	tr|C5H0C6|C5H0C6_PIG	Q96FW1	31 kDa	0.31	1.5
Proline-rich basic protein 1 OS=Sus scrofa OX=9823 GN=PROB1 PE=1 SV=2	tr|F1RGH4|F1RGH4_PIG	E7EW31	107 kDa	0.31	0.5
Uncharacterized protein OS=Sus scrofa OX=9823 GN=HSPE1 PE=3 SV=1	tr|F1SMZ6|F1SMZ6_PIG		11 kDa	0.31	1.1
Chaperonin containing TCP1 subunit 2 OS=Sus scrofa OX=9823 GN=CCT2 PE=1 SV=1	tr|F6Q936|F6Q936_PIG	P78371	57 kDa	0.31	1.3
Creatine kinase S-type, mitochondrial OS=Sus scrofa OX=9823 GN=CKMT2 PE=1 SV=1	tr|Q2HYU1|Q2HYU1_PIG	P17540	47 kDa	0.31	0.5
Protein AMBP (Fragment) OS=Sus scrofa OX=9823 GN=AMBP PE=1 SV=2	sp|P04366|AMBP_PIG	P02760	38 kDa	0.32	0.5
Transcription factor A, mitochondrial OS=Sus scrofa OX=9823 GN=TFAM PE=2 SV=1	sp|Q5D144|TFAM_PIG	Q00059	29 kDa	0.32	1.3
Emerin OS=Sus scrofa OX=9823 GN=EMD PE=4 SV=1	tr|A0A0U2ETD0|A0A0U2ETD0_PIG	P50402	29 kDa	0.32	1.7
3-hydroxybutyrate dehydrogenase 2 OS=Sus scrofa OX=9823 GN=BDH2 PE=1 SV=1	tr|A0A286ZSA7|A0A286ZSA7_PIG (+1)	Q9BUT1	26 kDa	0.32	1.4
Cardiomyopathy associated 5 OS=Sus scrofa OX=9823 GN=CMYA5 PE=1 SV=2	tr|A0A286ZYS8|A0A286ZYS8_PIG	Q8N3K9	451 kDa	0.32	0.03
Cysteine rich protein 2 OS=Sus scrofa OX=9823 GN=CRIP2 PE=1 SV=1	tr|A0A287A2M4|A0A287A2M4_PIG	P52943	25 kDa	0.32	0.9
cAMP-dependent protein kinase type I-alpha regulatory subunit OS=Sus scrofa OX=9823 GN=PRKAR1A PE=4 SV=1	tr|A0A287AKY1|A0A287AKY1_PIG	P10644	43 kDa	0.32	1.3
Uncharacterized protein OS=Sus scrofa OX=9823 GN=TPM2 PE=3 SV=2	tr|A0A287AN33|A0A287AN33_PIG		40 kDa	0.32	1.2
MICOS complex subunit OS=Sus scrofa OX=9823 GN=APOOL PE=1 SV=1	tr|A0A5G2QPN0|A0A5G2QPN0_PIG	Q6UXV4	29 kDa	0.32	0.7
PBX homeobox interacting protein 1 OS=Sus scrofa OX=9823 GN=PBXIP1 PE=1 SV=3	tr|F1RGP4|F1RGP4_PIG	Q96AQ6	80 kDa	0.32	0.7
Uncharacterized protein OS=Sus scrofa OX=9823 GN=TOMM22 PE=1 SV=2	tr|F1SLC2|F1SLC2_PIG		15 kDa	0.32	1.3
Ubiquitin carboxyl-terminal hydrolase OS=Sus scrofa OX=9823 GN=USP14 PE=1 SV=2	tr|I3LIN5|I3LIN5_PIG	P54578	56 kDa	0.32	1.5
Hemopexin OS=Sus scrofa OX=9823 GN=HPX PE=1 SV=1	sp|P50828|HEMO_PIG	P02790	51 kDa	0.33	0.5
GTP-binding protein SAR1b OS=Sus scrofa OX=9823 GN=SAR1B PE=2 SV=1	sp|Q5PYH3|SAR1B_PIG	Q9Y6B6	22 kDa	0.33	0.4
Citrate synthase OS=Sus scrofa OX=9823 GN=CS PE=1 SV=2	tr|A0A286ZKX2|A0A286ZKX2_PIG	O75390	45 kDa	0.33	1.2
Asparaginyl-tRNA synthetase OS=Sus scrofa OX=9823 GN=NARS1 PE=1 SV=1	tr|A0A287A133|A0A287A133_PIG (+1)	O43776	63 kDa	0.33	1.9
Fumarylacetoacetate hydrolase domain-containing protein 2 OS=Sus scrofa OX=9823 GN=LOC100522130 PE=1 SV=1	tr|A0A287AAP0|A0A287AAP0_PIG	Q96GK7	34 kDa	0.33	0.8
Chloride intracellular channel protein OS=Sus scrofa OX=9823 GN=CLIC1 PE=3 SV=1	tr|A0A287B2P1|A0A287B2P1_PIG	O00299	27 kDa	0.33	0.9
Acyl-CoA synthetase long chain family member 1 OS=Sus scrofa OX=9823 GN=ACSL1 PE=1 SV=1	tr|A0A287BM44|A0A287BM44_PIG (+1)	P33121	83 kDa	0.33	1.3
NADH dehydrogenase [ubiquinone] 1 subunit C2 OS=Sus scrofa OX=9823 GN=NDUFC2 PE=1 SV=1	tr|A0A480JRW3|A0A480JRW3_PIG	O95298	14 kDa	0.33	0.8
Uncharacterized protein OS=Sus scrofa OX=9823 GN=PEX19 PE=1 SV=1	tr|A0A5G2R2X9|A0A5G2R2X9_PIG		39 kDa	0.33	0.2
Metabolism of cobalamin associated A OS=Sus scrofa OX=9823 GN=MMAA PE=4 SV=1	tr|F1RS52|F1RS52_PIG	Q8IVH4	47 kDa	0.33	0.5
Laminin subunit alpha 4 OS=Sus scrofa OX=9823 GN=LAMA4 PE=1 SV=4	tr|F1RZM4|F1RZM4_PIG	Q16363	201 kDa	0.33	0.8
TPR_REGION domain-containing protein OS=Sus scrofa OX=9823 GN=UNC45B PE=4 SV=3	tr|F1S166|F1S166_PIG	Not present in human	99 kDa	0.33	1.6
Uncharacterized protein OS=Sus scrofa OX=9823 GN=SCP2 PE=1 SV=4	tr|F1S762|F1S762_PIG		56 kDa	0.33	1.3
28S ribosomal protein S26, mitochondrial OS=Sus scrofa OX=9823 GN=MRPS26 PE=1 SV=3	tr|F1S8A5|F1S8A5_PIG	Q9BYN8	24 kDa	0.33	0.3
Catalase OS=Sus scrofa OX=9823 GN=CAT PE=1 SV=3	tr|F1SGS9|F1SGS9_PIG	P04040	63 kDa	0.33	1.3
Uncharacterized protein OS=Sus scrofa OX=9823 GN=RBM3 PE=4 SV=2	tr|I3L5X7|I3L5X7_PIG		17 kDa	0.33	1.8
Microtubule-associated protein OS=Sus scrofa OX=9823 GN=MAPT PE=1 SV=2	tr|A0A286ZJ75|A0A286ZJ75_PIG (+3)	P10636	70 kDa	0.34	0.2
Ig-like domain-containing protein OS=Sus scrofa OX=9823 GN=BSG PE=1 SV=1	tr|A0A286ZS77|A0A286ZS77_PIG (+1)	P35613	30 kDa	0.34	0.8
Uncharacterized protein OS=Sus scrofa OX=9823 GN=RPL7 PE=4 SV=2	tr|A0A287A8T0|A0A287A8T0_PIG		29 kDa	0.34	1.4
Taxilin beta OS=Sus scrofa OX=9823 GN=TXLNB PE=1 SV=1	tr|A0A287A996|A0A287A996_PIG	Q8N3L3	76 kDa	0.34	1.3
Importin subunit alpha OS=Sus scrofa OX=9823 GN=KPNA6 PE=1 SV=1	tr|A0A287AEI6|A0A287AEI6_PIG	O60684	60 kDa	0.34	0.5
GC vitamin D binding protein OS=Sus scrofa OX=9823 GN=GC PE=1 SV=1	tr|A0A287AHK1|A0A287AHK1_PIG	P02774	54 kDa	0.34	0.6
Calsequestrin OS=Sus scrofa OX=9823 GN=CASQ2 PE=1 SV=1	tr|A0A287AWJ1|A0A287AWJ1_PIG	O14958	47 kDa	0.34	1.2
Talin 2 OS=Sus scrofa OX=9823 GN=TLN2 PE=1 SV=1	tr|A0A287B272|A0A287B272_PIG	Q9Y4G6	272 kDa	0.34	0.8
Thy-1 cell surface antigen OS=Sus scrofa OX=9823 GN=THY1 PE=1 SV=1	tr|A0A287B2P9|A0A287B2P9_PIG	P04216	18 kDa	0.34	1.4
NAD-dependent protein deacetylase OS=Sus scrofa OX=9823 GN=SIRT2 PE=1 SV=1	tr|A0A287B4T1|A0A287B4T1_PIG (+1)	Q8IXJ6	43 kDa	0.34	0.7
Mitogen-activated protein kinase OS=Sus scrofa OX=9823 GN=MAPK12 PE=3 SV=1	tr|A0A287B826|A0A287B826_PIG (+1)	P53778	44 kDa	0.34	2.4
ER lipid raft associated 2 OS=Sus scrofa OX=9823 GN=ERLIN2 PE=1 SV=1	tr|A0A287BRP6|A0A287BRP6_PIG	O94905	41 kDa	0.34	1.8
Calponin OS=Sus scrofa OX=9823 GN=CNN3 PE=1 SV=1	tr|A0A5G2QAL2|A0A5G2QAL2_PIG	Q15417	36 kDa	0.34	2.2
Karyopherin subunit beta 1 OS=Sus scrofa OX=9823 GN=KPNB1 PE=1 SV=1	tr|A0A5G2QZ16|A0A5G2QZ16_PIG (+1)	Q14974	97 kDa	0.34	1.3
Synaptopodin 2 like OS=Sus scrofa OX=9823 GN=SYNPO2L PE=4 SV=1	tr|A0A5G2R2B8|A0A5G2R2B8_PIG	Q9H987	101 kDa	0.34	0.8
Acyl-protein thioesterase 1 isoform 1 OS=Sus scrofa OX=9823 GN=LYPLA1 PE=1 SV=3	tr|F1RSG9|F1RSG9_PIG	O75608	25 kDa	0.34	1.3
Myosin motor domain-containing protein OS=Sus scrofa OX=9823 GN=MYH10 PE=1 SV=4	tr|F1SSA6|F1SSA6_PIG	P35580	110 kDa	0.34	1.4
Caveolae associated protein 2 OS=Sus scrofa OX=9823 GN=CAVIN2 PE=1 SV=2	tr|I3LDR9|I3LDR9_PIG	O95810	47 kDa	0.34	0.9
Syntrophin beta 2 OS=Sus scrofa OX=9823 GN=SNTB2 PE=1 SV=3	tr|I3LDU9|I3LDU9_PIG	Q13425	58 kDa	0.34	0.6
Prefoldin subunit 3 OS=Sus scrofa OX=9823 GN=VBP1 PE=1 SV=2	tr|K7GNY9|K7GNY9_PIG	P61758	27 kDa	0.34	1.7
Selenoprotein F OS=Sus scrofa OX=9823 GN=SELENOF PE=2 SV=2	sp|A1Z623|SEP15_PIG	O60613	18 kDa	0.35	0
Large proline-rich protein BAG6 OS=Sus scrofa OX=9823 GN=BAG6 PE=1 SV=1	sp|A5D9M6|BAG6_PIG (+2)	P46379	119 kDa	0.35	0
Protein canopy homolog 3 OS=Sus scrofa OX=9823 GN=CNPY3 PE=3 SV=1	sp|A5GFQ5|CNPY3_PIG (+1)	Q9BT09	32 kDa	0.35	0
Succinate dehydrogenase [ubiquinone] cytochrome b small subunit, mitochondrial OS=Sus scrofa OX=9823 GN=SDHD PE=1 SV=2	sp|A5GZW8|DHSD_PIG	O14521	17 kDa	0.35	0
Actin-binding Rho-activating protein OS=Sus scrofa OX=9823 GN=ABRA PE=2 SV=1	sp|B5SNZ6|ABRA_PIG (+1)	Q8N0Z2	44 kDa	0.35	0
Phosphatidylinositol 5-phosphate 4-kinase type-2 alpha OS=Sus scrofa OX=9823 GN=PIP4K2A PE=2 SV=1	sp|O13010|PI42A_PIG	P48426	46 kDa	0.35	INF
Serum amyloid P-component OS=Sus scrofa OX=9823 GN=APCS PE=2 SV=1	sp|O19063|SAMP_PIG	P02743	26 kDa	0.35	0
EKC/KEOPS complex subunit GON7 OS=Sus scrofa OX=9823 GN=GON7 PE=3 SV=1	sp|P0C8B5|GON7_PIG	Q9BXV9	11 kDa	0.35	0
Calpastatin OS=Sus scrofa OX=9823 GN=CAST PE=1 SV=1	sp|P12675|ICAL_PIG	P20810	77 kDa	0.35	0
SPARC OS=Sus scrofa OX=9823 GN=SPARC PE=1 SV=2	sp|P20112|SPRC_PIG	P09486	34 kDa	0.35	INF
Platelet factor 4 OS=Sus scrofa OX=9823 GN=PF4 PE=1 SV=2	sp|P30034|PLF4_PIG (+1)	P02776	10 kDa	0.35	INF
Dermatopontin OS=Sus scrofa OX=9823 GN=DPT PE=1 SV=2	sp|P45846|DERM_PIG (+1)	Q07507	22 kDa	0.35	INF
DNA-directed RNA polymerase II subunit RPB9 OS=Sus scrofa OX=9823 GN=POLR2I PE=1 SV=1	sp|P60899|RPB9_PIG	P36954	15 kDa	0.35	INF
Microsomal glutathione S-transferase 1 OS=Sus scrofa OX=9823 GN=MGST1 PE=2 SV=3	sp|P79382|MGST1_PIG	P10620	18 kDa	0.35	INF
Cytochrome c oxidase copper chaperone OS=Sus scrofa OX=9823 GN=COX17 PE=1 SV=1	sp|P81045|COX17_PIG (+1)	Q14061	7 kDa	0.35	0
U1 small nuclear ribonucleoprotein A OS=Sus scrofa OX=9823 GN=SNRPA PE=1 SV=1	sp|Q06AA4|SNRPA_PIG	P09012	31 kDa	0.35	INF
5'-AMP-activated protein kinase catalytic subunit alpha-1 (Fragments) OS=Sus scrofa OX=9823 GN=PRKAA1 PE=1 SV=2	sp|Q09136|AAPK1_PIG	Q13131	44 kDa	0.35	INF
Cathepsin L1 OS=Sus scrofa OX=9823 GN=CTSL PE=2 SV=1	sp|Q28944|CATL1_PIG	P07711	37 kDa	0.35	0
60S ribosomal protein L35 OS=Sus scrofa OX=9823 GN=RPL35 PE=1 SV=3	sp|Q29361|RL35_PIG	P42766	15 kDa	0.35	INF
Guanine nucleotide-binding protein G(q) subunit alpha OS=Sus scrofa OX=9823 GN=GNAQ PE=2 SV=3	sp|Q2PKF4|GNAQ_PIG	P50148	42 kDa	0.35	0
Guanine nucleotide-binding protein subunit alpha-11 OS=Sus scrofa OX=9823 GN=GNA11 PE=2 SV=2	sp|Q2XSV9|GNA11_PIG (+1)	P29992	42 kDa	0.35	INF
ATP synthase subunit a OS=Sus scrofa OX=9823 GN=MT-ATP6 PE=1 SV=2	sp|Q35915|ATP6_PIG	P00846	25 kDa	0.35	INF
40S ribosomal protein SA OS=Sus scrofa OX=9823 GN=RPSA PE=1 SV=3	sp|Q4GWZ2|RSSA_PIG (+1)	P08865	33 kDa	0.35	1.4
Ras-related protein Rab-14 OS=Sus scrofa OX=9823 GN=RAB14 PE=2 SV=3	sp|Q52NJ6|RAB14_PIG	P61106	24 kDa	0.35	INF
Protein quaking OS=Sus scrofa OX=9823 GN=QKI PE=2 SV=1	sp|Q5W9D5|QKI_PIG (+2)	Q96PU8	38 kDa	0.35	INF
E3 ubiquitin-protein ligase RNF114 OS=Sus scrofa OX=9823 GN=RNF114 PE=1 SV=1	sp|Q6J1I8|RN114_PIG	Q9Y508	26 kDa	0.35	0
Aquaporin-1 OS=Sus scrofa OX=9823 GN=AQP1 PE=2 SV=3	sp|Q6PQZ1|AQP1_PIG (+1)	P29972	29 kDa	0.35	0
Copper chaperone for superoxide dismutase OS=Sus scrofa OX=9823 GN=CCS PE=2 SV=1	sp|Q6PWT7|CCS_PIG	O14618	29 kDa	0.35	INF
Protein phosphatase 1 regulatory subunit 14B OS=Sus scrofa OX=9823 GN=PPP1R14B PE=2 SV=1	sp|Q8MIK9|PP14B_PIG	Q96C90	16 kDa	0.35	INF
N-acetylgalactosamine-6-sulfatase OS=Sus scrofa OX=9823 GN=GALNS PE=2 SV=1	sp|Q8WNQ7|GALNS_PIG	P34059	58 kDa	0.35	0
Male-enhanced antigen 1 OS=Sus scrofa OX=9823 GN=MEA1 PE=2 SV=2	sp|Q95313|MEA1_PIG	Q16626	19 kDa	0.35	0
Arginase-1 OS=Sus scrofa OX=9823 GN=ARG1 PE=2 SV=1	sp|Q95JC8|ARGI1_PIG	P05089	35 kDa	0.35	INF
Fatty-acid amide hydrolase 1 OS=Sus scrofa OX=9823 GN=FAAH PE=1 SV=1	sp|Q9TUI8|FAAH1_PIG	O00519	63 kDa	0.35	0
Complement component C7 OS=Sus scrofa OX=9823 GN=C7 PE=1 SV=1	sp|Q9TUQ3|CO7_PIG (+2)	P10643	93 kDa	0.35	0
Trans-1,2-dihydrobenzene-1,2-diol dehydrogenase OS=Sus scrofa OX=9823 GN=DHDH PE=1 SV=1	sp|Q9TV69|DHDH_PIG	Q9UQ10	37 kDa	0.35	1.5
Ig-like domain-containing protein OS=Sus scrofa OX=9823 PE=4 SV=7	tr|A0A075B7J0|A0A075B7J0_PIG	Not present in human	10 kDa	0.35	0
Mannose-1-phosphate guanyltransferase alpha OS=Sus scrofa OX=9823 GN=GMPPA PE=4 SV=3	tr|A0A140TAL0|A0A140TAL0_PIG	Q96IJ6	46 kDa	0.35	INF
Vasodilator stimulated phosphoprotein OS=Sus scrofa OX=9823 GN=VASP PE=4 SV=2	tr|A0A286ZJ91|A0A286ZJ91_PIG (+1)	P50552	38 kDa	0.35	INF
Protein transport protein sec16 OS=Sus scrofa OX=9823 GN=SEC16A PE=1 SV=1	tr|A0A286ZJC7|A0A286ZJC7_PIG (+5)	O15027	240 kDa	0.35	0
2'-5'-oligoadenylate synthetase 2 OS=Sus scrofa OX=9823 GN=OAS2 PE=4 SV=2	tr|A0A286ZK05|A0A286ZK05_PIG (+4)	P29728	78 kDa	0.35	INF
Small ArfGAP 1 OS=Sus scrofa OX=9823 GN=SMAP1 PE=4 SV=1	tr|A0A286ZK44|A0A286ZK44_PIG	Q8IYB5	12 kDa	0.35	0
Paralemmin-1 OS=Sus scrofa OX=9823 GN=PALM PE=4 SV=1	tr|A0A286ZKH7|A0A286ZKH7_PIG	O75781	42 kDa	0.35	0
Syndecan binding protein OS=Sus scrofa OX=9823 GN=SDCBP PE=1 SV=2	tr|A0A286ZKH9|A0A286ZKH9_PIG	O00560	32 kDa	0.35	INF
Sideroflexin 4 OS=Sus scrofa OX=9823 GN=SFXN4 PE=4 SV=1	tr|A0A286ZKL2|A0A286ZKL2_PIG	Q6P4A7	35 kDa	0.35	INF
Erythrocyte membrane protein band 4.1 like 3 OS=Sus scrofa OX=9823 GN=EPB41L3 PE=1 SV=2	tr|A0A286ZL32|A0A286ZL32_PIG	Q9Y2J2	105 kDa	0.35	0
Uncharacterized protein OS=Sus scrofa OX=9823 GN=ANP32E PE=1 SV=1	tr|A0A286ZL69|A0A286ZL69_PIG		29 kDa	0.35	0
Musashi RNA binding protein 2 OS=Sus scrofa OX=9823 GN=MSI2 PE=4 SV=1	tr|A0A286ZLC8|A0A286ZLC8_PIG (+2)	Q96DH6	35 kDa	0.35	0
Peroxin-14 OS=Sus scrofa OX=9823 GN=PEX14 PE=1 SV=1	tr|A0A286ZLS4|A0A286ZLS4_PIG	O75381	43 kDa	0.35	0
Coactivator associated arginine methyltransferase 1 OS=Sus scrofa OX=9823 GN=CARM1 PE=1 SV=1	tr|A0A286ZLV5|A0A286ZLV5_PIG (+3)	Q86X55	63 kDa	0.35	0
Scaffold attachment factor B OS=Sus scrofa OX=9823 GN=SAFB PE=1 SV=1	tr|A0A286ZLW6|A0A286ZLW6_PIG	Q15424	88 kDa	0.35	0
Inositol hexakisphosphate and diphosphoinositol-pentakisphosphate kinase OS=Sus scrofa OX=9823 GN=PPIP5K2 PE=3 SV=1	tr|A0A286ZMF1|A0A286ZMF1_PIG (+2)	O43314	132 kDa	0.35	0
Uncharacterized protein OS=Sus scrofa OX=9823 GN=LOC102167481 PE=1 SV=1	tr|A0A286ZMH6|A0A286ZMH6_PIG		60 kDa	0.35	0
FAS-associated factor 2 OS=Sus scrofa OX=9823 GN=FAF2 PE=1 SV=2	tr|A0A286ZMY6|A0A286ZMY6_PIG	Q96CS3	53 kDa	0.35	0
Surfeit 4 OS=Sus scrofa OX=9823 GN=SURF4 PE=4 SV=1	tr|A0A286ZQW5|A0A286ZQW5_PIG	O15260	30 kDa	0.35	INF
SERPIN domain-containing protein OS=Sus scrofa OX=9823 PE=1 SV=1	tr|A0A286ZRF3|A0A286ZRF3_PIG	A8MTL9	45 kDa	0.35	0
SERPIN domain-containing protein OS=Sus scrofa OX=9823 GN=SERPINH1 PE=1 SV=1	tr|A0A286ZRU9|A0A286ZRU9_PIG	P50454	47 kDa	0.35	1.3
Agrin OS=Sus scrofa OX=9823 GN=AGRN PE=1 SV=1	tr|A0A286ZS39|A0A286ZS39_PIG	O00468	223 kDa	0.35	0.7
Ubiquitin recognition factor in ER associated degradation 1 OS=Sus scrofa OX=9823 GN=UFD1 PE=1 SV=1	tr|A0A286ZS40|A0A286ZS40_PIG (+1)	Q92890	33 kDa	0.35	INF
Proline rich coiled-coil 2C OS=Sus scrofa OX=9823 GN=PRRC2C PE=1 SV=2	tr|A0A286ZS85|A0A286ZS85_PIG (+1)	Q9Y520	317 kDa	0.35	0
RCSD domain containing 1 OS=Sus scrofa OX=9823 GN=RCSD1 PE=1 SV=1	tr|A0A286ZSH0|A0A286ZSH0_PIG	Q6JBY9	50 kDa	0.35	0
Serine hydroxymethyltransferase OS=Sus scrofa OX=9823 GN=SHMT1 PE=1 SV=1	tr|A0A286ZSR0|A0A286ZSR0_PIG	P34896	70 kDa	0.35	INF
Leucine rich repeat containing 39 OS=Sus scrofa OX=9823 GN=LRRC39 PE=4 SV=2	tr|A0A286ZT07|A0A286ZT07_PIG	Q96DD0	37 kDa	0.35	0
Prolyl 4-hydroxylase subunit alpha 1 OS=Sus scrofa OX=9823 GN=P4HA1 PE=1 SV=1	tr|A0A286ZUW5|A0A286ZUW5_PIG (+4)	P13674	61 kDa	0.35	INF
Splicing factor 3B subunit 3 OS=Sus scrofa OX=9823 GN=SF3B3 PE=1 SV=1	tr|A0A286ZVS0|A0A286ZVS0_PIG	Q15393	136 kDa	0.35	INF
Uncharacterized protein OS=Sus scrofa OX=9823 GN=CELF2 PE=4 SV=2	tr|A0A286ZW19|A0A286ZW19_PIG		56 kDa	0.35	0
Ubiquilin 2 OS=Sus scrofa OX=9823 GN=UBQLN2 PE=4 SV=2	tr|A0A286ZWA5|A0A286ZWA5_PIG	Q9UHD9	61 kDa	0.35	0
HCLS1 binding protein 3 OS=Sus scrofa OX=9823 GN=HS1BP3 PE=1 SV=1	tr|A0A286ZXF2|A0A286ZXF2_PIG	Q53T59	44 kDa	0.35	0
Uncharacterized protein OS=Sus scrofa OX=9823 PE=4 SV=1	tr|A0A286ZXI4|A0A286ZXI4_PIG (+1)		94 kDa	0.35	INF
Cysteine protease OS=Sus scrofa OX=9823 GN=ATG4B PE=3 SV=1	tr|A0A286ZY26|A0A286ZY26_PIG (+1)	Q9Y4P1	45 kDa	0.35	0
ABI family member 3 binding protein OS=Sus scrofa OX=9823 GN=ABI3BP PE=1 SV=2	tr|A0A286ZYL3|A0A286ZYL3_PIG (+7)	Q7Z7G0	163 kDa	0.35	0
Ig-like domain-containing protein OS=Sus scrofa OX=9823 PE=4 SV=1	tr|A0A286ZYQ7|A0A286ZYQ7_PIG	Not present in human	16 kDa	0.35	0
10-formyltetrahydrofolate dehydrogenase OS=Sus scrofa OX=9823 GN=ALDH1L1 PE=1 SV=1	tr|A0A286ZYU8|A0A286ZYU8_PIG	O75891	95 kDa	0.35	0
Methionyl-tRNA synthetase 2, mitochondrial OS=Sus scrofa OX=9823 GN=MARS2 PE=3 SV=1	tr|A0A286ZYY0|A0A286ZYY0_PIG	Q96GW9	67 kDa	0.35	0
Chromosome 12 open reading frame 57 OS=Sus scrofa OX=9823 GN=C5H12orf57 PE=1 SV=1	tr|A0A287A018|A0A287A018_PIG	Not present in human	13 kDa	0.35	0
Maltase-glucoamylase OS=Sus scrofa OX=9823 GN=MGAM PE=1 SV=1	tr|A0A287A042|A0A287A042_PIG	O43451	207 kDa	0.35	0
MICOS complex subunit MIC60 OS=Sus scrofa OX=9823 GN=IMMT PE=1 SV=1	tr|A0A287A2N6|A0A287A2N6_PIG	Q16891	76 kDa	0.35	0
Uncharacterized protein OS=Sus scrofa OX=9823 GN=SH3BGRL PE=1 SV=2	tr|A0A287A2S6|A0A287A2S6_PIG		25 kDa	0.35	1.6
Mitochondrial Rho GTPase OS=Sus scrofa OX=9823 GN=RHOT1 PE=1 SV=1	tr|A0A287A323|A0A287A323_PIG	Q8IXI2	72 kDa	0.35	0
Putative deoxyribonuclease TATDN3 isoform X6 OS=Sus scrofa OX=9823 GN=TATDN3 PE=4 SV=2	tr|A0A287A4L5|A0A287A4L5_PIG (+1)	Q17R31	30 kDa	0.35	0
Actin beta like 2 OS=Sus scrofa OX=9823 GN=ACTBL2 PE=1 SV=2	tr|A0A287A4R1|A0A287A4R1_PIG	Q562R1	43 kDa	0.35	INF
Striatin 4 OS=Sus scrofa OX=9823 GN=STRN4 PE=1 SV=1	tr|A0A287A4V5|A0A287A4V5_PIG (+1)	Q9NRL3	96 kDa	0.35	0
GMP reductase OS=Sus scrofa OX=9823 GN=GMPR2 PE=1 SV=1	tr|A0A287A4Y2|A0A287A4Y2_PIG	Q9P2T1	38 kDa	0.35	INF
C-terminal binding protein 1 OS=Sus scrofa OX=9823 GN=CTBP1 PE=3 SV=2	tr|A0A287A5I0|A0A287A5I0_PIG (+1)	Q13363	46 kDa	0.35	0
Protein activator of interferon induced protein kinase EIF2AK2 OS=Sus scrofa OX=9823 GN=PRKRA PE=1 SV=1	tr|A0A287A5I9|A0A287A5I9_PIG	P19525	34 kDa	0.35	0
HSPA (Hsp70) binding protein 1 OS=Sus scrofa OX=9823 GN=HSPBP1 PE=1 SV=2	tr|A0A287A5U7|A0A287A5U7_PIG (+1)	Q9NZL4	37 kDa	0.35	0
Prostaglandin E synthase 3 like OS=Sus scrofa OX=9823 GN=PTGES3L PE=4 SV=1	tr|A0A287A5Z5|A0A287A5Z5_PIG (+1)	E9PB15	16 kDa	0.35	INF
DUF727 domain-containing protein OS=Sus scrofa OX=9823 GN=GSKIP PE=4 SV=2	tr|A0A287A787|A0A287A787_PIG (+1)	Q9P0R6	31 kDa	0.35	0
Threonine synthase-like 1 OS=Sus scrofa OX=9823 GN=THNSL1 PE=1 SV=2	tr|A0A287A821|A0A287A821_PIG (+2)	Q8IYQ7	83 kDa	0.35	0
Methylcrotonoyl-CoA carboxylase 1 OS=Sus scrofa OX=9823 GN=MCCC1 PE=1 SV=2	tr|A0A287A8I4|A0A287A8I4_PIG	Q96RQ3	84 kDa	0.35	0
Lunapark, ER junction formation factor OS=Sus scrofa OX=9823 GN=LNPK PE=1 SV=2	tr|A0A287A8V7|A0A287A8V7_PIG (+1)	Q9C0E8	47 kDa	0.35	INF
Chromosome 1 open reading frame 198 OS=Sus scrofa OX=9823 GN=C14H1orf198 PE=1 SV=2	tr|A0A287A947|A0A287A947_PIG	Not present in human	38 kDa	0.35	0
Protoporphyrinogen oxidase OS=Sus scrofa OX=9823 GN=PPOX PE=3 SV=2	tr|A0A287A9V6|A0A287A9V6_PIG	P50336	52 kDa	0.35	0
Afadin, adherens junction formation factor OS=Sus scrofa OX=9823 GN=AFDN PE=1 SV=2	tr|A0A287AAY5|A0A287AAY5_PIG	P55196	202 kDa	0.35	0
Ubiquitin specific peptidase 47 OS=Sus scrofa OX=9823 GN=USP47 PE=1 SV=1	tr|A0A287ABS5|A0A287ABS5_PIG (+2)	Q96K76	154 kDa	0.35	0
Splicing factor 3a subunit 1 OS=Sus scrofa OX=9823 GN=SF3A1 PE=1 SV=1	tr|A0A287ACP7|A0A287ACP7_PIG	Q15459	81 kDa	0.35	0
Peroxiredoxin like 2A OS=Sus scrofa OX=9823 GN=PRXL2A PE=1 SV=1	tr|A0A287ACV7|A0A287ACV7_PIG (+1)	Q9BRX8	24 kDa	0.35	INF
Ferredoxin-2, mitochondrial OS=Sus scrofa OX=9823 GN=LOC100526209 PE=1 SV=1	tr|A0A287ACW7|A0A287ACW7_PIG	Q6P4F2	20 kDa	0.35	0
Mitochondrial ribosomal protein S22 OS=Sus scrofa OX=9823 GN=MRPS22 PE=1 SV=1	tr|A0A287AD99|A0A287AD99_PIG (+1)	P82650	40 kDa	0.35	0
Uncharacterized protein OS=Sus scrofa OX=9823 PE=1 SV=1	tr|A0A287ADR1|A0A287ADR1_PIG		26 kDa	0.35	0
NHL repeat containing 3 OS=Sus scrofa OX=9823 GN=NHLRC3 PE=4 SV=2	tr|A0A287AE74|A0A287AE74_PIG	Q5JS37	49 kDa	0.35	0
Ig-like domain-containing protein OS=Sus scrofa OX=9823 GN=SLA-2 PE=1 SV=1	tr|A0A287AEH7|A0A287AEH7_PIG	Not present in human	43 kDa	0.35	INF
Chromosome 11 open reading frame 58 OS=Sus scrofa OX=9823 GN=C2H11orf58 PE=4 SV=2	tr|A0A287AEP6|A0A287AEP6_PIG	Not present in human	19 kDa	0.35	INF
Tyrosine-protein phosphatase non-receptor type 12 OS=Sus scrofa OX=9823 GN=PTPN12 PE=3 SV=1	tr|A0A287AF36|A0A287AF36_PIG	Q05209	85 kDa	0.35	0
Uncharacterized protein OS=Sus scrofa OX=9823 PE=1 SV=2	tr|A0A287AG00|A0A287AG00_PIG		18 kDa	0.35	0
G3BP stress granule assembly factor 2 OS=Sus scrofa OX=9823 GN=G3BP2 PE=1 SV=1	tr|A0A287AG37|A0A287AG37_PIG (+1)	Q9UN86	51 kDa	0.35	INF
Aspartate beta-hydroxylase OS=Sus scrofa OX=9823 GN=ASPH PE=1 SV=2	tr|A0A287AI01|A0A287AI01_PIG (+1)	Q12797	84 kDa	0.35	0
Uncharacterized protein OS=Sus scrofa OX=9823 GN=TBC1D4 PE=1 SV=1	tr|A0A287AIZ2|A0A287AIZ2_PIG		130 kDa	0.35	0
SEC31 homolog A, COPII coat complex component OS=Sus scrofa OX=9823 GN=SEC31A PE=1 SV=2	tr|A0A287AJF0|A0A287AJF0_PIG	O94979	130 kDa	0.35	INF
ADP-ribosylation factor-binding protein GGA1 isoform 1 OS=Sus scrofa OX=9823 GN=GGA1 PE=1 SV=1	tr|A0A287AJM0|A0A287AJM0_PIG	Q9UJY5	70 kDa	0.35	0
Phosducin like 3 OS=Sus scrofa OX=9823 GN=PDCL3 PE=1 SV=1	tr|A0A287AK42|A0A287AK42_PIG	Q9H2J4	27 kDa	0.35	0
Aminoacyl tRNA synthetase complex interacting multifunctional protein 1 OS=Sus scrofa OX=9823 GN=AIMP1 PE=1 SV=2	tr|A0A287AKA2|A0A287AKA2_PIG (+1)	Q12904	36 kDa	0.35	0
Protein lin-7 homolog OS=Sus scrofa OX=9823 GN=LIN7C PE=1 SV=2	tr|A0A287AKE5|A0A287AKE5_PIG (+4)	Q9NUP9	22 kDa	0.35	INF
Uncharacterized protein OS=Sus scrofa OX=9823 GN=LAGE3 PE=1 SV=2	tr|A0A287AKR8|A0A287AKR8_PIG		16 kDa	0.35	INF
V-type proton ATPase subunit G OS=Sus scrofa OX=9823 GN=TMEM268 PE=3 SV=1	tr|A0A287AKZ9|A0A287AKZ9_PIG	Q5VZI3	14 kDa	0.35	0
Ig-like domain-containing protein OS=Sus scrofa OX=9823 PE=4 SV=1	tr|A0A287ALJ6|A0A287ALJ6_PIG	Not present in human	17 kDa	0.35	0
DnaJ heat shock protein family (Hsp40) member B5 OS=Sus scrofa OX=9823 GN=DNAJB5 PE=4 SV=1	tr|A0A287ALZ7|A0A287ALZ7_PIG	O75953	52 kDa	0.35	0
ATP synthase mitochondrial F1 complex assembly factor 1 OS=Sus scrofa OX=9823 GN=ATPAF1 PE=1 SV=2	tr|A0A287ANF8|A0A287ANF8_PIG	Q5TC12	37 kDa	0.35	INF
Coenzyme Q10B OS=Sus scrofa OX=9823 GN=COQ10B PE=4 SV=2	tr|A0A287ANW3|A0A287ANW3_PIG (+1)	Q9H8M1	22 kDa	0.35	0
Chimaerin OS=Sus scrofa OX=9823 GN=CHN1 PE=1 SV=1	tr|A0A287APY3|A0A287APY3_PIG	P15882	53 kDa	0.35	0
Complement factor I isoform 1 preproprotein OS=Sus scrofa OX=9823 GN=CFI PE=1 SV=1	tr|A0A287AQ20|A0A287AQ20_PIG	P05156	65 kDa	0.35	INF
Interacts with SUPT6H, CTD assembly factor 1 OS=Sus scrofa OX=9823 GN=IWS1 PE=4 SV=2	tr|A0A287AQP7|A0A287AQP7_PIG (+2)	Q96ST2	94 kDa	0.35	0
Ecm29 proteasome adaptor and scaffold OS=Sus scrofa OX=9823 GN=ECPAS PE=1 SV=1	tr|A0A287ARA7|A0A287ARA7_PIG	Q5VYK3	204 kDa	0.35	0
Myosin VC OS=Sus scrofa OX=9823 GN=MYO5C PE=3 SV=1	tr|A0A287ARB4|A0A287ARB4_PIG (+1)	Q9NQX4	203 kDa	0.35	INF
Eukaryotic translation initiation factor 3 subunit F OS=Sus scrofa OX=9823 GN=EIF3F PE=3 SV=1	tr|A0A287ARI1|A0A287ARI1_PIG	O00303	36 kDa	0.35	INF
FMC1-LUC7L2 readthrough OS=Sus scrofa OX=9823 GN=FMC1-LUC7L2 PE=1 SV=1	tr|A0A287ARJ9|A0A287ARJ9_PIG	Not present in human	38 kDa	0.35	INF
NADPH:adrenodoxin oxidoreductase, mitochondrial OS=Sus scrofa OX=9823 GN=FDXR PE=1 SV=2	tr|A0A287ASY8|A0A287ASY8_PIG	P22570	57 kDa	0.35	0
Ectonucleotide pyrophosphatase/phosphodiesterase 1 OS=Sus scrofa OX=9823 GN=ENPP1 PE=1 SV=2	tr|A0A287AT99|A0A287AT99_PIG	P22413	83 kDa	0.35	0
Uncharacterized protein OS=Sus scrofa OX=9823 GN=HSPD1 PE=1 SV=1	tr|A0A287ATN8|A0A287ATN8_PIG		50 kDa	0.35	1.2
Protocadherin 1 OS=Sus scrofa OX=9823 GN=PCDH1 PE=4 SV=2	tr|A0A287AU89|A0A287AU89_PIG (+1)	Q08174	148 kDa	0.35	0
Chloride channel CLIC like 1 OS=Sus scrofa OX=9823 GN=CLCC1 PE=1 SV=1	tr|A0A287AUI7|A0A287AUI7_PIG (+2)	Q96S66	68 kDa	0.35	0
Dynein light intermediate chain OS=Sus scrofa OX=9823 GN=DYNC1LI2 PE=1 SV=1	tr|A0A287AVN3|A0A287AVN3_PIG (+1)	O43237	54 kDa	0.35	0
Legumain OS=Sus scrofa OX=9823 GN=LGMN PE=1 SV=1	tr|A0A287AW67|A0A287AW67_PIG	Q99538	49 kDa	0.35	INF
Sphingosine-1-phosphate lyase 1 OS=Sus scrofa OX=9823 GN=SGPL1 PE=1 SV=1	tr|A0A287AX55|A0A287AX55_PIG	O95470	67 kDa	0.35	0
Vesicle trafficking 1 OS=Sus scrofa OX=9823 GN=VTA1 PE=1 SV=1	tr|A0A287AY26|A0A287AY26_PIG (+2)	Not present in human	34 kDa	0.35	INF
Lysophosphatidylglycerol acyltransferase 1 OS=Sus scrofa OX=9823 GN=LPGAT1 PE=1 SV=1	tr|A0A287AYP8|A0A287AYP8_PIG (+1)	Q92604	48 kDa	0.35	0
Nucleoporin 62 OS=Sus scrofa OX=9823 GN=NUP62 PE=1 SV=1	tr|A0A287AZ57|A0A287AZ57_PIG	P37198	49 kDa	0.35	0
Caspase-3 OS=Sus scrofa OX=9823 GN=CASP3 PE=3 SV=2	tr|A0A287AZZ1|A0A287AZZ1_PIG	P42574	30 kDa	0.35	0
ADP ribosylation factor like GTPase 8B OS=Sus scrofa OX=9823 GN=ARL8B PE=1 SV=2	tr|A0A287B0I4|A0A287B0I4_PIG	Q9NVJ2	21 kDa	0.35	INF
Uncharacterized protein OS=Sus scrofa OX=9823 GN=FARS2 PE=4 SV=2	tr|A0A287B0P0|A0A287B0P0_PIG		72 kDa	0.35	INF
Indolethylamine N-methyltransferase isoform 1 OS=Sus scrofa OX=9823 GN=INMT PE=1 SV=1	tr|A0A287B0Z8|A0A287B0Z8_PIG	O95050	29 kDa	0.35	INF
NIF3-like protein 1 OS=Sus scrofa OX=9823 GN=NIF3L1 PE=1 SV=2	tr|A0A287B238|A0A287B238_PIG (+1)	Q9GZT8	42 kDa	0.35	INF
Cold shock domain containing E1 OS=Sus scrofa OX=9823 GN=CSDE1 PE=1 SV=1	tr|A0A287B2T9|A0A287B2T9_PIG (+1)	O75534	94 kDa	0.35	0
60S ribosomal protein L17 isoform a OS=Sus scrofa OX=9823 GN=RPL17-C18orf32 PE=1 SV=1	tr|A0A287B386|A0A287B386_PIG (+1)	P18621	22 kDa	0.35	INF
Magnesium-dependent phosphatase 1 isoform 1 OS=Sus scrofa OX=9823 GN=MDP1 PE=1 SV=1	tr|A0A287B391|A0A287B391_PIG	Q86V88	19 kDa	0.35	0
RNA binding motif protein 14 OS=Sus scrofa OX=9823 GN=RBM14 PE=1 SV=1	tr|A0A287B401|A0A287B401_PIG	Q96PK6	70 kDa	0.35	0
Uncharacterized protein OS=Sus scrofa OX=9823 GN=LNPEP PE=1 SV=1	tr|A0A287B4N1|A0A287B4N1_PIG		117 kDa	0.35	0
Annexin OS=Sus scrofa OX=9823 GN=ANXA4 PE=3 SV=2	tr|A0A287B583|A0A287B583_PIG	P09525	36 kDa	0.35	0.6
Epidermal growth factor receptor pathway substrate 15 like 1 OS=Sus scrofa OX=9823 GN=EPS15L1 PE=1 SV=2	tr|A0A287B5N2|A0A287B5N2_PIG	Q9UBC2	103 kDa	0.35	0
Apoptotic chromatin condensation inducer 1 OS=Sus scrofa OX=9823 GN=ACIN1 PE=1 SV=2	tr|A0A287B6W8|A0A287B6W8_PIG	Q9UKV3	150 kDa	0.35	0
Serine and arginine rich splicing factor 10 OS=Sus scrofa OX=9823 GN=SRSF10 PE=1 SV=2	tr|A0A287B770|A0A287B770_PIG	O75494	31 kDa	0.35	0
Nudix hydrolase 13 OS=Sus scrofa OX=9823 GN=NUDT13 PE=4 SV=1	tr|A0A287B7K3|A0A287B7K3_PIG	Q86X67	40 kDa	0.35	0
Thyroglobulin type-1 domain-containing protein OS=Sus scrofa OX=9823 GN=CD74 PE=4 SV=2	tr|A0A287B7S0|A0A287B7S0_PIG	Q9NUB1	32 kDa	0.35	INF
Uncharacterized protein OS=Sus scrofa OX=9823 GN=TSNAX PE=1 SV=1	tr|A0A287B8Q8|A0A287B8Q8_PIG		33 kDa	0.35	INF
Histone H2A OS=Sus scrofa OX=9823 GN=HIST1H2AC PE=3 SV=1	tr|A0A287B959|A0A287B959_PIG	A0A024R017	16 kDa	0.35	INF
Inosine triphosphate pyrophosphatase OS=Sus scrofa OX=9823 GN=ITPA PE=3 SV=2	tr|A0A287B9Y7|A0A287B9Y7_PIG	Q9BY32	22 kDa	0.35	INF
Dystonin OS=Sus scrofa OX=9823 GN=DST PE=1 SV=2	tr|A0A287BAP9|A0A287BAP9_PIG	Q03001	854 kDa	0.35	0
Insulin degrading enzyme OS=Sus scrofa OX=9823 GN=IDE PE=1 SV=1	tr|A0A287BBS8|A0A287BBS8_PIG (+1)	P14735	118 kDa	0.35	INF
Uncharacterized protein OS=Sus scrofa OX=9823 GN=FOLH1B PE=1 SV=2	tr|A0A287BBW9|A0A287BBW9_PIG		84 kDa	0.35	0
NAD kinase 2, mitochondrial OS=Sus scrofa OX=9823 GN=NADK2 PE=1 SV=1	tr|A0A287BBX3|A0A287BBX3_PIG	Q4G0N4	52 kDa	0.35	0
Phosphopantothenoylcysteine decarboxylase OS=Sus scrofa OX=9823 GN=PPCDC PE=4 SV=1	tr|A0A287BCN6|A0A287BCN6_PIG	Q96CD2	24 kDa	0.35	0
Tripeptidyl peptidase 2 OS=Sus scrofa OX=9823 GN=TPP2 PE=1 SV=2	tr|A0A287BD60|A0A287BD60_PIG	P29144	135 kDa	0.35	INF
Mitochondrial import inner membrane translocase subunit Tim21 OS=Sus scrofa OX=9823 GN=TIMM21 PE=1 SV=1	tr|A0A287BDA0|A0A287BDA0_PIG	Q9BVV7	28 kDa	0.35	0
Solute carrier family 27 member 5 OS=Sus scrofa OX=9823 GN=SLC27A5 PE=1 SV=2	tr|A0A287BDD8|A0A287BDD8_PIG	Q9Y2P5	78 kDa	0.35	0
Solute carrier family 12 member 7 OS=Sus scrofa OX=9823 GN=SLC12A7 PE=4 SV=2	tr|A0A287BE45|A0A287BE45_PIG	Q9Y666	119 kDa	0.35	0
Uncharacterized protein OS=Sus scrofa OX=9823 GN=CYRIB PE=1 SV=1	tr|A0A287BED5|A0A287BED5_PIG	Q92841	39 kDa	0.35	0
PDZ and LIM domain 7 OS=Sus scrofa OX=9823 GN=PDLIM7 PE=1 SV=1	tr|A0A287BEH6|A0A287BEH6_PIG	Q9NR12	55 kDa	0.35	0
Niban apoptosis regulator 2 OS=Sus scrofa OX=9823 GN=NIBAN2 PE=4 SV=2	tr|A0A287BEJ3|A0A287BEJ3_PIG	Q96TA1	83 kDa	0.35	0
Nucleoporin 153 OS=Sus scrofa OX=9823 GN=NUP153 PE=1 SV=1	tr|A0A287BF68|A0A287BF68_PIG	P49790	153 kDa	0.35	0
Wolframin ER transmembrane glycoprotein OS=Sus scrofa OX=9823 GN=WFS1 PE=1 SV=2	tr|A0A287BFZ3|A0A287BFZ3_PIG	O76024	99 kDa	0.35	0
MACPF domain-containing protein OS=Sus scrofa OX=9823 GN=C9 PE=1 SV=1	tr|A0A287BH90|A0A287BH90_PIG (+1)	Not present in human	65 kDa	0.35	INF
Secernin 2 OS=Sus scrofa OX=9823 GN=SCRN2 PE=1 SV=1	tr|A0A287BJ40|A0A287BJ40_PIG (+1)	Q96FV2	47 kDa	0.35	INF
Immunity related GTPase Q OS=Sus scrofa OX=9823 GN=IRGQ PE=1 SV=1	tr|A0A287BJ85|A0A287BJ85_PIG	Q8WZA9	61 kDa	0.35	0
Sphingomyelin phosphodiesterase acid like 3B OS=Sus scrofa OX=9823 GN=SMPDL3B PE=1 SV=1	tr|A0A287BJW1|A0A287BJW1_PIG	Q92485	46 kDa	0.35	0
Mitogen-activated protein kinase kinase 3 OS=Sus scrofa OX=9823 GN=MAP2K3 PE=3 SV=2	tr|A0A287BK34|A0A287BK34_PIG	P46734	36 kDa	0.35	2.5
Uncharacterized protein OS=Sus scrofa OX=9823 GN=LOC100157017 PE=3 SV=1	tr|A0A287BKR9|A0A287BKR9_PIG		36 kDa	0.35	INF
Heterogeneous nuclear ribonucleoprotein H1 OS=Sus scrofa OX=9823 GN=HNRNPH1 PE=4 SV=2	tr|A0A287BL05|A0A287BL05_PIG	P31943	52 kDa	0.35	0.7
Cytochrome c heme lyase OS=Sus scrofa OX=9823 GN=HCCS PE=1 SV=1	tr|A0A287BLS9|A0A287BLS9_PIG (+1)	P53701	34 kDa	0.35	INF
Ubiquitin family domain containing 1 OS=Sus scrofa OX=9823 GN=UBFD1 PE=1 SV=2	tr|A0A287BM51|A0A287BM51_PIG	O14562	31 kDa	0.35	0
Ig-like domain-containing protein OS=Sus scrofa OX=9823 PE=4 SV=2	tr|A0A287BMT4|A0A287BMT4_PIG	Not present in human	11 kDa	0.35	0
Ubiquitin conjugating enzyme E2 M OS=Sus scrofa OX=9823 GN=UBE2M PE=1 SV=2	tr|A0A287BNE4|A0A287BNE4_PIG	P61081	25 kDa	0.35	0
Neprilysin OS=Sus scrofa OX=9823 GN=MME PE=1 SV=1	tr|A0A287BPD6|A0A287BPD6_PIG	P08473	86 kDa	0.35	0
Uncharacterized protein OS=Sus scrofa OX=9823 GN=TACC2 PE=1 SV=1	tr|A0A287BPN3|A0A287BPN3_PIG (+1)		208 kDa	0.35	0
Adenylate cyclase 3 OS=Sus scrofa OX=9823 GN=ADCY3 PE=1 SV=1	tr|A0A287BPU6|A0A287BPU6_PIG	O60266	148 kDa	0.35	INF
Canopy FGF signaling regulator 4 OS=Sus scrofa OX=9823 GN=CNPY4 PE=4 SV=1	tr|A0A287BQG2|A0A287BQG2_PIG	Q8N129	27 kDa	0.35	0
Ficolin-2 OS=Sus scrofa OX=9823 GN=FCN2 PE=1 SV=1	tr|A0A287BQR3|A0A287BQR3_PIG	Q15485	35 kDa	0.35	0
Clustered mitochondria protein homolog OS=Sus scrofa OX=9823 GN=CLUH PE=1 SV=2	tr|A0A287BR17|A0A287BR17_PIG (+1)	O75153	178 kDa	0.35	INF
Signal peptidase complex catalytic subunit SEC11 OS=Sus scrofa OX=9823 GN=SEC11A PE=1 SV=2	tr|A0A287BRT7|A0A287BRT7_PIG (+1)	P67812	20 kDa	0.35	INF
Proteasome subunit beta OS=Sus scrofa OX=9823 GN=PSMB10 PE=1 SV=1	tr|A0A287BRV0|A0A287BRV0_PIG	P40306	32 kDa	0.35	0
Protein-serine/threonine kinase OS=Sus scrofa OX=9823 GN=PDK2 PE=3 SV=1	tr|A0A287BSA1|A0A287BSA1_PIG	Q15119	49 kDa	0.35	0
G protein pathway suppressor 1 OS=Sus scrofa OX=9823 GN=GPS1 PE=4 SV=2	tr|A0A287BSE8|A0A287BSE8_PIG	Q13098	59 kDa	0.35	INF
Serine/threonine-protein phosphatase 2A activator OS=Sus scrofa OX=9823 GN=PTPA PE=1 SV=2	tr|A0A287BT03|A0A287BT03_PIG	Q15257	32 kDa	0.35	0
Platelet-activating factor acetylhydrolase OS=Sus scrofa OX=9823 GN=PLA2G7 PE=1 SV=1	tr|A0A288CFZ8|A0A288CFZ8_PIG	Q13093	48 kDa	0.35	INF
Aldehyde dehydrogenase 1 family member A3 OS=Sus scrofa OX=9823 GN=ALDH1A3 PE=1 SV=1	tr|A0A480JMD7|A0A480JMD7_PIG (+1)	P47895	56 kDa	0.35	0
Mitochondrial import inner membrane translocase subunit TIM50 OS=Sus scrofa OX=9823 GN=TIMM50 PE=1 SV=1	tr|A0A480LC98|A0A480LC98_PIG	Q3ZCQ8	40 kDa	0.35	0.6
CDC42 effector protein 1 OS=Sus scrofa OX=9823 GN=CDC42EP1 PE=4 SV=1	tr|A0A480P3R5|A0A480P3R5_PIG	Q00587	39 kDa	0.35	0
MIA SH3 domain ER export factor 3 OS=Sus scrofa OX=9823 GN=MIA3 PE=1 SV=1	tr|A0A480RSB2|A0A480RSB2_PIG (+1)	Q5JRA6	213 kDa	0.35	0
ADP-sugar pyrophosphatase isoform 1 OS=Sus scrofa OX=9823 GN=NUDT5 PE=1 SV=1	tr|A0A480XE17|A0A480XE17_PIG	Q9UKK9	24 kDa	0.35	0
Ubiquilin 4 OS=Sus scrofa OX=9823 GN=UBQLN4 PE=1 SV=1	tr|A0A480Y2F0|A0A480Y2F0_PIG	Q9NRR5	64 kDa	0.35	0
U2 snRNP auxiliary factor large subunit OS=Sus scrofa OX=9823 GN=U2AF2 PE=3 SV=1	tr|A0A481APG3|A0A481APG3_PIG	P26368	54 kDa	0.35	0
Tumor protein D52 isoform 5 OS=Sus scrofa OX=9823 GN=TPD52 PE=1 SV=1	tr|A0A481BLE6|A0A481BLE6_PIG	P55327	26 kDa	0.35	0
Uncharacterized protein OS=Sus scrofa OX=9823 GN=ICAM1 PE=1 SV=1	tr|A0A5G2Q6W7|A0A5G2Q6W7_PIG (+1)		58 kDa	0.35	0
Spectrin alpha, erythrocytic 1 OS=Sus scrofa OX=9823 GN=SPTA1 PE=1 SV=1	tr|A0A5G2Q8C3|A0A5G2Q8C3_PIG	P02549	280 kDa	0.35	INF
Sec1 family domain containing 2 OS=Sus scrofa OX=9823 GN=SCFD2 PE=1 SV=1	tr|A0A5G2Q8C9|A0A5G2Q8C9_PIG (+1)	Q8WU76	70 kDa	0.35	INF
EMAP like 1 OS=Sus scrofa OX=9823 GN=EML1 PE=1 SV=1	tr|A0A5G2Q8W0|A0A5G2Q8W0_PIG	O00423	99 kDa	0.35	INF
Bromodomain and WD repeat domain containing 1 OS=Sus scrofa OX=9823 GN=BRWD1 PE=1 SV=1	tr|A0A5G2QB67|A0A5G2QB67_PIG (+1)	Q9NSI6	30 kDa	0.35	0
Creatine kinase M-type OS=Sus scrofa OX=9823 GN=CKM PE=1 SV=1	tr|A0A5G2QBV6|A0A5G2QBV6_PIG	P06732	42 kDa	0.35	0
Atlastin GTPase 3 OS=Sus scrofa OX=9823 GN=ATL3 PE=1 SV=1	tr|A0A5G2QCA3|A0A5G2QCA3_PIG	Q6DD88	60 kDa	0.35	INF
Galectin OS=Sus scrofa OX=9823 GN=LGALS3 PE=1 SV=1	tr|A0A5G2QE07|A0A5G2QE07_PIG (+4)	P17931	27 kDa	0.35	INF
Thioredoxin related transmembrane protein 2 OS=Sus scrofa OX=9823 GN=TMX2 PE=1 SV=1	tr|A0A5G2QEH9|A0A5G2QEH9_PIG	Q9Y320	37 kDa	0.35	0
t-SNARE coiled-coil homology domain-containing protein OS=Sus scrofa OX=9823 GN=STX12 PE=1 SV=1	tr|A0A5G2QFC9|A0A5G2QFC9_PIG	Q86Y82	31 kDa	0.35	INF
Solute carrier family 25 member 1 OS=Sus scrofa OX=9823 GN=SLC25A1 PE=1 SV=1	tr|A0A5G2QHR5|A0A5G2QHR5_PIG	P53007	57 kDa	0.35	0
Coatomer subunit alpha OS=Sus scrofa OX=9823 GN=COPA PE=1 SV=1	tr|A0A5G2QHU0|A0A5G2QHU0_PIG (+1)	P53621	140 kDa	0.35	0
Phosphomannomutase OS=Sus scrofa OX=9823 GN=PMM2 PE=1 SV=1	tr|A0A5G2QI20|A0A5G2QI20_PIG	O15305	34 kDa	0.35	0
Vacuolar protein sorting-associated protein 29 OS=Sus scrofa OX=9823 GN=VPS29 PE=1 SV=1	tr|A0A5G2QIE0|A0A5G2QIE0_PIG	Q9UBQ0	20 kDa	0.35	INF
Tropomyosin alpha-3 chain OS=Sus scrofa OX=9823 GN=TPM3 PE=1 SV=1	tr|A0A5G2QIK0|A0A5G2QIK0_PIG	P06753	31 kDa	0.35	1.4
UBIQUITIN_CONJUGAT_2 domain-containing protein OS=Sus scrofa OX=9823 GN=UBE2V1 PE=1 SV=1	tr|A0A5G2QIZ7|A0A5G2QIZ7_PIG	Q13404	19 kDa	0.35	INF
Fermitin family member 2 OS=Sus scrofa OX=9823 GN=FERMT2 PE=1 SV=1	tr|A0A5G2QJI7|A0A5G2QJI7_PIG	Q96AC1	81 kDa	0.35	0
Short coiled-coil protein OS=Sus scrofa OX=9823 GN=SCOC PE=1 SV=1	tr|A0A5G2QJR4|A0A5G2QJR4_PIG	Q9UIL1	18 kDa	0.35	0
Reticulophagy regulator family member 2 OS=Sus scrofa OX=9823 GN=RETREG2 PE=1 SV=1	tr|A0A5G2QJV9|A0A5G2QJV9_PIG (+1)	Q8NC44	56 kDa	0.35	0
Uncharacterized protein OS=Sus scrofa OX=9823 PE=4 SV=1	tr|A0A5G2QM05|A0A5G2QM05_PIG		60 kDa	0.35	0
Fibrillin 2 OS=Sus scrofa OX=9823 GN=FBN2 PE=1 SV=1	tr|A0A5G2QM06|A0A5G2QM06_PIG	P35556	314 kDa	0.35	0
Family with sequence similarity 114 member A1 OS=Sus scrofa OX=9823 GN=FAM114A1 PE=1 SV=1	tr|A0A5G2QMA5|A0A5G2QMA5_PIG	Q8IWE2	60 kDa	0.35	0
Importin subunit alpha OS=Sus scrofa OX=9823 GN=KPNA3 PE=1 SV=1	tr|A0A5G2QMC1|A0A5G2QMC1_PIG (+1)	O00505	57 kDa	0.35	INF
Ras homolog family member C OS=Sus scrofa OX=9823 GN=RHOC PE=1 SV=1	tr|A0A5G2QN15|A0A5G2QN15_PIG	P08134	22 kDa	0.35	0
ENAH actin regulator OS=Sus scrofa OX=9823 GN=ENAH PE=1 SV=1	tr|A0A5G2QNU8|A0A5G2QNU8_PIG	Q8N8S7	64 kDa	0.35	INF
Actin related protein 1B OS=Sus scrofa OX=9823 GN=ACTR1B PE=1 SV=1	tr|A0A5G2QNY6|A0A5G2QNY6_PIG	P42025	42 kDa	0.35	INF
Switching B cell complex subunit SWAP70 OS=Sus scrofa OX=9823 GN=SWAP70 PE=1 SV=1	tr|A0A5G2QQG7|A0A5G2QQG7_PIG	Q9UH65	69 kDa	0.35	0
Protein arginine N-methyltransferase 5 OS=Sus scrofa OX=9823 GN=PRMT5 PE=1 SV=1	tr|A0A5G2QRI8|A0A5G2QRI8_PIG (+1)	O14744	76 kDa	0.35	INF
NOP2/Sun RNA methyltransferase 2 OS=Sus scrofa OX=9823 GN=NSUN2 PE=1 SV=1	tr|A0A5G2QRK5|A0A5G2QRK5_PIG (+1)	Q08J23	107 kDa	0.35	0
AKT1 substrate 1 OS=Sus scrofa OX=9823 GN=AKT1S1 PE=4 SV=1	tr|A0A5G2QRU9|A0A5G2QRU9_PIG (+1)	Q96B36	34 kDa	0.35	0
Microtubule associated protein RP/EB family member 2 OS=Sus scrofa OX=9823 GN=MAPRE2 PE=1 SV=1	tr|A0A5G2QSA4|A0A5G2QSA4_PIG	Q15555	51 kDa	0.35	INF
Mitogen-activated protein kinase OS=Sus scrofa OX=9823 GN=MAPK14 PE=1 SV=1	tr|A0A5G2QSG6|A0A5G2QSG6_PIG	Q16539	41 kDa	0.35	0
Methylcrotonoyl-CoA carboxylase 2 OS=Sus scrofa OX=9823 GN=MCCC2 PE=1 SV=1	tr|A0A5G2QSH7|A0A5G2QSH7_PIG	Q9HCC0	54 kDa	0.35	0
Hydroxysteroid 17-beta dehydrogenase 10 OS=Sus scrofa OX=9823 GN=HSD17B10 PE=1 SV=1	tr|A0A5G2QSR2|A0A5G2QSR2_PIG	Q99714	17 kDa	0.35	0
AIRC domain-containing protein OS=Sus scrofa OX=9823 GN=PAICS PE=1 SV=1	tr|A0A5G2QTY6|A0A5G2QTY6_PIG	P22234	47 kDa	0.35	0
TP53RK binding protein OS=Sus scrofa OX=9823 GN=TPRKB PE=1 SV=1	tr|A0A5G2QUU9|A0A5G2QUU9_PIG	Q9Y3C4	22 kDa	0.35	0
Pribosyltran_N domain-containing protein OS=Sus scrofa OX=9823 GN=PRPS1 PE=1 SV=1	tr|A0A5G2QV35|A0A5G2QV35_PIG	P60891	31 kDa	0.35	INF
NEDD8-activating enzyme E1 catalytic subunit isoform 1 OS=Sus scrofa OX=9823 GN=UBA3 PE=1 SV=1	tr|A0A5G2QVD2|A0A5G2QVD2_PIG	Q8TBC4	52 kDa	0.35	0
Neurofilament medium polypeptide OS=Sus scrofa OX=9823 GN=NEFM PE=1 SV=1	tr|A0A5G2QW19|A0A5G2QW19_PIG	P07197	95 kDa	0.35	INF
LRR binding FLII interacting protein 1 OS=Sus scrofa OX=9823 GN=LRRFIP1 PE=1 SV=1	tr|A0A5G2QW94|A0A5G2QW94_PIG	Q32MZ4	91 kDa	0.35	0
Agmatinase OS=Sus scrofa OX=9823 GN=AGMAT PE=1 SV=1	tr|A0A5G2QWA2|A0A5G2QWA2_PIG	Q9BSE5	39 kDa	0.35	0
Caveolae associated protein 3 OS=Sus scrofa OX=9823 GN=CAVIN3 PE=1 SV=1	tr|A0A5G2QWV6|A0A5G2QWV6_PIG (+1)	Q969G5	30 kDa	0.35	0
Uncharacterized protein OS=Sus scrofa OX=9823 GN=PCDH7 PE=1 SV=1	tr|A0A5G2QXC2|A0A5G2QXC2_PIG		136 kDa	0.35	0
Scaffold attachment factor B2 OS=Sus scrofa OX=9823 GN=SAFB2 PE=1 SV=1	tr|A0A5G2QXD1|A0A5G2QXD1_PIG	Q14151	111 kDa	0.35	0.2
Uncharacterized protein OS=Sus scrofa OX=9823 GN=SMIM20 PE=1 SV=1	tr|A0A5G2QXM2|A0A5G2QXM2_PIG		11 kDa	0.35	INF
Molybdopterin molybdenumtransferase OS=Sus scrofa OX=9823 GN=GPHN PE=1 SV=1	tr|A0A5G2QZ15|A0A5G2QZ15_PIG	Q9NQX3	84 kDa	0.35	0
Kininogen 1 OS=Sus scrofa OX=9823 GN=KNG1 PE=1 SV=1	tr|A0A5G2QZH2|A0A5G2QZH2_PIG	P01042	70 kDa	0.35	0
Eukaryotic translation initiation factor 3 subunit L OS=Sus scrofa OX=9823 GN=EIF3L PE=1 SV=1	tr|A0A5G2QZR0|A0A5G2QZR0_PIG	Q9Y262	61 kDa	0.35	0
Interferon induced protein with tetratricopeptide repeats 5 OS=Sus scrofa OX=9823 GN=IFIT5 PE=1 SV=1	tr|A0A5G2R0A9|A0A5G2R0A9_PIG (+1)	Q13325	57 kDa	0.35	INF
Adenosine kinase OS=Sus scrofa OX=9823 GN=ADK PE=1 SV=1	tr|A0A5G2R0F5|A0A5G2R0F5_PIG	P55263	40 kDa	0.35	0
Bis(5'-adenosyl)-triphosphatase OS=Sus scrofa OX=9823 GN=FHIT PE=1 SV=1	tr|A0A5G2R0L2|A0A5G2R0L2_PIG	P49789	17 kDa	0.35	0
Golgi integral membrane protein 4 OS=Sus scrofa OX=9823 GN=GOLIM4 PE=4 SV=1	tr|A0A5G2R1A1|A0A5G2R1A1_PIG	O00461	83 kDa	0.35	0
Scaffold attachment factor B OS=Sus scrofa OX=9823 GN=SAFB PE=1 SV=1	tr|A0A5G2R206|A0A5G2R206_PIG (+1)	Q15424	109 kDa	0.35	0
Glutamyl-tRNA(Gln) amidotransferase subunit C, mitochondrial OS=Sus scrofa OX=9823 GN=GATC PE=1 SV=1	tr|A0A5G2R2H1|A0A5G2R2H1_PIG	O43716	15 kDa	0.35	0
Uncharacterized protein OS=Sus scrofa OX=9823 GN=MRPL40 PE=1 SV=1	tr|A0A5G2R2V2|A0A5G2R2V2_PIG		24 kDa	0.35	INF
Zinc finger and BTB domain containing 22 OS=Sus scrofa OX=9823 GN=ZBTB22 PE=1 SV=1	tr|A0A5G2R356|A0A5G2R356_PIG	O15209	60 kDa	0.35	0
Beta-ureidopropionase OS=Sus scrofa OX=9823 GN=UPB1 PE=1 SV=1	tr|A0A5G2R361|A0A5G2R361_PIG	Q9UBR1	43 kDa	0.35	0
CAP-ZIP_m domain-containing protein OS=Sus scrofa OX=9823 GN=LOC100522401 PE=1 SV=1	tr|A0A5G2R3P4|A0A5G2R3P4_PIG	Q6JBY9	144 kDa	0.35	0
Valosin containing protein lysine methyltransferase OS=Sus scrofa OX=9823 GN=VCPKMT PE=4 SV=1	tr|A0A5G2R556|A0A5G2R556_PIG	Q9H867	21 kDa	0.35	0
Fibronectin type III and SPRY domain containing 2 OS=Sus scrofa OX=9823 GN=FSD2 PE=4 SV=1	tr|A0A5G2R598|A0A5G2R598_PIG (+1)	A1L4K1	80 kDa	0.35	0
Alpha-L-fucosidase OS=Sus scrofa OX=9823 GN=FUCA2 PE=1 SV=1	tr|A0A5G2R599|A0A5G2R599_PIG (+1)	Q9BTY2	53 kDa	0.35	0
Golgi glycoprotein 1 OS=Sus scrofa OX=9823 GN=GLG1 PE=1 SV=1	tr|A0A5G2R7B7|A0A5G2R7B7_PIG	Q92896	133 kDa	0.35	0
Phosphatidylinositol transfer protein alpha OS=Sus scrofa OX=9823 GN=PITPNA PE=1 SV=1	tr|A0A5G2R815|A0A5G2R815_PIG	Q00169	32 kDa	0.35	INF
Caspase recruitment domain family member 19 OS=Sus scrofa OX=9823 GN=CARD19 PE=1 SV=1	tr|A0A5G2R909|A0A5G2R909_PIG	Q96LW7	21 kDa	0.35	0
Uncharacterized protein OS=Sus scrofa OX=9823 GN=LOC102167522 PE=1 SV=1	tr|A0A5G2R965|A0A5G2R965_PIG		11 kDa	0.35	0
KASH domain-containing protein OS=Sus scrofa OX=9823 PE=1 SV=1	tr|A0A5G2R996|A0A5G2R996_PIG	Q8N6L0	114 kDa	0.35	0
Eukaryotic translation initiation factor 3 subunit D OS=Sus scrofa OX=9823 GN=EIF3D PE=1 SV=1	tr|A0A5G2R9Q2|A0A5G2R9Q2_PIG	O15371	64 kDa	0.35	0
Paraoxonase 2 OS=Sus scrofa OX=9823 GN=PON2 PE=1 SV=1	tr|A0A5G2RAW3|A0A5G2RAW3_PIG (+1)	Q15165	39 kDa	0.35	INF
Uridine 5'-monophosphate synthase OS=Sus scrofa OX=9823 GN=UMPS PE=1 SV=1	tr|A0A5G2RBV3|A0A5G2RBV3_PIG	P11172	52 kDa	0.35	0
Pentatricopeptide repeat domain 3 OS=Sus scrofa OX=9823 GN=PTCD3 PE=1 SV=1	tr|A0A5G2RD60|A0A5G2RD60_PIG	Q96EY7	76 kDa	0.35	INF
U6 snRNA-associated Sm-like protein LSm4 OS=Sus scrofa OX=9823 GN=LSM4 PE=3 SV=1	tr|A0A5G2RE37|A0A5G2RE37_PIG	Q9Y4Z0	21 kDa	0.35	INF
Mitogen-activated protein kinase OS=Sus scrofa OX=9823 GN=MAPK1 PE=1 SV=1	tr|A0A5G2RG05|A0A5G2RG05_PIG	P28482	62 kDa	0.35	INF
Mitochondrial ribosomal protein L15 OS=Sus scrofa OX=9823 GN=MRPL15 PE=1 SV=1	tr|A0A5G2RG26|A0A5G2RG26_PIG (+1)	Q9P015	33 kDa	0.35	0
Miff domain-containing protein OS=Sus scrofa OX=9823 GN=MFF PE=1 SV=1	tr|A0A5G2RH58|A0A5G2RH58_PIG	Q9GZY8	33 kDa	0.35	INF
Vitamin K-dependent protein C OS=Sus scrofa OX=9823 GN=PROC PE=3 SV=1	tr|A0A5G2RIA8|A0A5G2RIA8_PIG	P04070	55 kDa	0.35	0
Coagulation factor XIII A chain OS=Sus scrofa OX=9823 GN=F13A1 PE=1 SV=1	tr|A0A5G2RIC7|A0A5G2RIC7_PIG (+1)	P00488	87 kDa	0.35	INF
Early endosome antigen 1 OS=Sus scrofa OX=9823 GN=EEA1 PE=1 SV=1	tr|A0A5G2RJ76|A0A5G2RJ76_PIG	Q15075	147 kDa	0.35	INF
Histone-binding protein RBBP4 OS=Sus scrofa OX=9823 GN=RBBP4 PE=1 SV=1	tr|A0A5K1VU58|A0A5K1VU58_PIG	Q09028	48 kDa	0.35	INF
Cathepsin Z OS=Sus scrofa OX=9823 GN=CTSZ PE=1 SV=1	tr|A5GFX7|A5GFX7_PIG	Q9UBR2	34 kDa	0.35	0
Calbindin 1 OS=Sus scrofa OX=9823 GN=CALB1 PE=1 SV=1	tr|B3VFB6|B3VFB6_PIG	P05937	30 kDa	0.35	INF
Malonyl-CoA decarboxylase OS=Sus scrofa OX=9823 GN=MLYCD PE=4 SV=1	tr|D2D0E6|D2D0E6_PIG	O95822	56 kDa	0.35	0
Zinc finger FYVE domain-containing protein 16 OS=Sus scrofa OX=9823 GN=ZFYVE16 PE=4 SV=3	tr|F1RF24|F1RF24_PIG	Q7Z3T8	169 kDa	0.35	0
Uncharacterized protein OS=Sus scrofa OX=9823 GN=AIMP2 PE=1 SV=2	tr|F1RFM7|F1RFM7_PIG		35 kDa	0.35	INF
Uncharacterized protein OS=Sus scrofa OX=9823 GN=MLEC PE=4 SV=2	tr|F1RJI1|F1RJI1_PIG		63 kDa	0.35	0
Ribosome maturation protein SBDS OS=Sus scrofa OX=9823 GN=SBDS PE=1 SV=1	tr|F1RJJ3|F1RJJ3_PIG	Q9Y3A5	29 kDa	0.35	INF
PDZ and LIM domain 4 OS=Sus scrofa OX=9823 GN=PDLIM4 PE=1 SV=3	tr|F1RJV5|F1RJV5_PIG	P50479	36 kDa	0.35	0
Carboxypeptidase B2 OS=Sus scrofa OX=9823 GN=CPB2 PE=1 SV=3	tr|F1RK01|F1RK01_PIG	Q96IY4	49 kDa	0.35	INF
Glyceraldehyde-3-phosphate dehydrogenase OS=Sus scrofa OX=9823 GN=GAPDHS PE=1 SV=3	tr|F1RM74|F1RM74_PIG	O14556	44 kDa	0.35	0
DBC1 domain-containing protein OS=Sus scrofa OX=9823 GN=CCAR2 PE=1 SV=3	tr|F1RMA3|F1RMA3_PIG	Q8N163	102 kDa	0.35	0
Glycine N-acyltransferase isoform a OS=Sus scrofa OX=9823 GN=LOC100518109 PE=1 SV=3	tr|F1RMF7|F1RMF7_PIG	Q6IB77	34 kDa	0.35	0
Oxysterol-binding protein OS=Sus scrofa OX=9823 GN=OSBP PE=1 SV=2	tr|F1RMJ9|F1RMJ9_PIG	P22059	90 kDa	0.35	0
VLIG-type G domain-containing protein OS=Sus scrofa OX=9823 GN=LOC110255360 PE=1 SV=4	tr|F1RMQ6|F1RMQ6_PIG	Not present in human	279 kDa	0.35	INF
Bleomycin hydrolase OS=Sus scrofa OX=9823 GN=BLMH PE=1 SV=4	tr|F1RN71|F1RN71_PIG	Q13867	52 kDa	0.35	INF
Uncharacterized protein OS=Sus scrofa OX=9823 GN=CD5L PE=1 SV=4	tr|F1RN76|F1RN76_PIG		63 kDa	0.35	0
Transcription elongation factor spt6 OS=Sus scrofa OX=9823 GN=SUPT6H PE=1 SV=4	tr|F1RNB0|F1RNB0_PIG	Q7KZ85	185 kDa	0.35	0
Calcium/calmodulin dependent protein kinase kinase 2 OS=Sus scrofa OX=9823 GN=CAMKK2 PE=4 SV=2	tr|F1RNP6|F1RNP6_PIG	Q96RR4	63 kDa	0.35	0
Family with sequence similarity 114 member A2 OS=Sus scrofa OX=9823 GN=FAM114A2 PE=1 SV=3	tr|F1RQC1|F1RQC1_PIG	Q9NRY5	51 kDa	0.35	0
La ribonucleoprotein domain family member 1 OS=Sus scrofa OX=9823 GN=LARP1 PE=1 SV=3	tr|F1RQC5|F1RQC5_PIG	Q6PKG0	124 kDa	0.35	0
Collagen type XII alpha 1 chain OS=Sus scrofa OX=9823 GN=COL12A1 PE=1 SV=3	tr|F1RQI0|F1RQI0_PIG	Q99715	333 kDa	0.35	INF
Phosphoinositide phospholipase C OS=Sus scrofa OX=9823 GN=PLCD3 PE=1 SV=2	tr|F1RR07|F1RR07_PIG	Q8N3E9	89 kDa	0.35	0
3-oxoacyl-[acyl-carrier-protein] synthase, mitochondrial OS=Sus scrofa OX=9823 GN=OXSM PE=3 SV=3	tr|F1RS43|F1RS43_PIG	Q9NWU1	49 kDa	0.35	0
N(4)-(Beta-N-acetylglucosaminyl)-L-asparaginase OS=Sus scrofa OX=9823 GN=AGA PE=1 SV=2	tr|F1RT17|F1RT17_PIG	P20933	37 kDa	0.35	0
Signal recognition particle subunit SRP72 OS=Sus scrofa OX=9823 GN=SRP72 PE=1 SV=3	tr|F1RTV6|F1RTV6_PIG	O76094	73 kDa	0.35	0
Barrier to autointegration factor 1 OS=Sus scrofa OX=9823 GN=BANF1 PE=4 SV=1	tr|F1RU33|F1RU33_PIG	O75531	10 kDa	0.35	INF
Pyruvate carboxylase OS=Sus scrofa OX=9823 GN=PC PE=1 SV=4	tr|F1RUV5|F1RUV5_PIG	P11498	122 kDa	0.35	INF
CDK5 regulatory subunit associated protein 3 OS=Sus scrofa OX=9823 GN=CDK5RAP3 PE=1 SV=3	tr|F1RWH6|F1RWH6_PIG	Q96JB5	57 kDa	0.35	INF
Mitochondrial ribosomal protein L10 OS=Sus scrofa OX=9823 GN=MRPL10 PE=1 SV=2	tr|F1RWJ0|F1RWJ0_PIG	Q7Z7H8	29 kDa	0.35	0
Hypoxia inducible factor 1 subunit alpha inhibitor OS=Sus scrofa OX=9823 GN=HIF1AN PE=4 SV=4	tr|F1RWL6|F1RWL6_PIG	Q9NWT6	40 kDa	0.35	INF
GLOBIN domain-containing protein OS=Sus scrofa OX=9823 GN=CYGB PE=1 SV=3	tr|F1RWP3|F1RWP3_PIG	Q8WWM9	45 kDa	0.35	INF
RWD domain containing 1 OS=Sus scrofa OX=9823 GN=RWDD1 PE=1 SV=1	tr|F1RX91|F1RX91_PIG	Q9H446	28 kDa	0.35	0
Bridging integrator 1 OS=Sus scrofa OX=9823 GN=BIN1 PE=1 SV=3	tr|F1RXZ6|F1RXZ6_PIG	O00499	50 kDa	0.35	0
NADH:ubiquinone oxidoreductase complex assembly factor 6 OS=Sus scrofa OX=9823 GN=NDUFAF6 PE=1 SV=2	tr|F1RY58|F1RY58_PIG	Q330K2	38 kDa	0.35	0
Uncharacterized protein OS=Sus scrofa OX=9823 GN=DKC1 PE=4 SV=2	tr|F1RZ24|F1RZ24_PIG		58 kDa	0.35	0
N-sulfoglucosamine sulfohydrolase OS=Sus scrofa OX=9823 GN=SGSH PE=1 SV=3	tr|F1RZ89|F1RZ89_PIG	P51688	57 kDa	0.35	0
UBX domain protein 4 OS=Sus scrofa OX=9823 GN=UBXN4 PE=1 SV=2	tr|F1S0D8|F1S0D8_PIG	Q92575	57 kDa	0.35	INF
Synaptopodin 2 OS=Sus scrofa OX=9823 GN=SYNPO2 PE=1 SV=4	tr|F1S156|F1S156_PIG	Q9UMS6	117 kDa	0.35	0
Eukaryotic translation initiation factor 3 subunit E OS=Sus scrofa OX=9823 GN=EIF3E PE=1 SV=3	tr|F1S1G0|F1S1G0_PIG	P60228	52 kDa	0.35	INF
Cellular repressor of E1A stimulated genes 1 OS=Sus scrofa OX=9823 GN=CREG1 PE=1 SV=1	tr|F1S268|F1S268_PIG	O75629	24 kDa	0.35	0
Cytochrome b5 heme-binding domain-containing protein OS=Sus scrofa OX=9823 GN=CYB5B PE=1 SV=2	tr|F1S393|F1S393_PIG	O43169	14 kDa	0.35	0
Uncharacterized protein OS=Sus scrofa OX=9823 GN=ACOT6 PE=4 SV=2	tr|F1S3J0|F1S3J0_PIG		47 kDa	0.35	0
Pantetheinase OS=Sus scrofa OX=9823 GN=VNN3 PE=1 SV=3	tr|F1S3Q8|F1S3Q8_PIG		56 kDa	0.35	0
Xanthine dehydrogenase OS=Sus scrofa OX=9823 GN=XDH PE=1 SV=3	tr|F1S3Y7|F1S3Y7_PIG	P47989	147 kDa	0.35	INF
Family with sequence similarity 98 member A OS=Sus scrofa OX=9823 GN=FAM98A PE=1 SV=1	tr|F1S408|F1S408_PIG	Q8NCA5	55 kDa	0.35	0
Charged multivesicular body protein 4B OS=Sus scrofa OX=9823 GN=CHMP4B PE=1 SV=3	tr|F1S4Z2|F1S4Z2_PIG	Q9H444	25 kDa	0.35	INF
Pre-mRNA-splicing factor ATP-dependent RNA helicase DHX15 OS=Sus scrofa OX=9823 GN=DHX15 PE=1 SV=1	tr|F1S5A8|F1S5A8_PIG	O43143	91 kDa	0.35	INF
Fibromodulin OS=Sus scrofa OX=9823 GN=FMOD PE=1 SV=3	tr|F1S6B5|F1S6B5_PIG	Q06828	43 kDa	0.35	2.6
Epidermal growth factor receptor pathway substrate 15 OS=Sus scrofa OX=9823 GN=EPS15 PE=1 SV=4	tr|F1S6G0|F1S6G0_PIG	P42566	103 kDa	0.35	0
ABRA C-terminal like OS=Sus scrofa OX=9823 GN=ABRACL PE=4 SV=3	tr|F1S6Z3|F1S6Z3_PIG	Q9P1F3	9 kDa	0.35	0
Mago homolog, exon junction complex subunit OS=Sus scrofa OX=9823 GN=MAGOH PE=1 SV=2	tr|F1S766|F1S766_PIG	P61326	17 kDa	0.35	INF
Complement C8 alpha chain OS=Sus scrofa OX=9823 GN=C8A PE=1 SV=3	tr|F1S788|F1S788_PIG	P07357	66 kDa	0.35	0
Coatomer subunit epsilon OS=Sus scrofa OX=9823 GN=COPE PE=1 SV=4	tr|F1S7E1|F1S7E1_PIG	O14579	35 kDa	0.35	INF
SH3 domain containing GRB2 like 1, endophilin A2 OS=Sus scrofa OX=9823 GN=SH3GL1 PE=1 SV=2	tr|F1S7L8|F1S7L8_PIG	Q99961	45 kDa	0.35	INF
Heat shock protein family A (Hsp70) member 12B OS=Sus scrofa OX=9823 GN=HSPA12B PE=4 SV=2	tr|F1S8C1|F1S8C1_PIG	Q96MM6	77 kDa	0.35	0
O-GlcNAcase OS=Sus scrofa OX=9823 GN=OGA PE=4 SV=2	tr|F1S8T6|F1S8T6_PIG	O60502	97 kDa	0.35	0
Cytochrome c oxidase assembly homolog COX15 OS=Sus scrofa OX=9823 GN=COX15 PE=4 SV=4	tr|F1S8W1|F1S8W1_PIG	Q7KZN9	46 kDa	0.35	INF
Microtubule associated protein 1S OS=Sus scrofa OX=9823 GN=MAP1S PE=1 SV=1	tr|F1S939|F1S939_PIG	Q66K74	113 kDa	0.35	INF
Fucokinase domain-containing protein OS=Sus scrofa OX=9823 GN=FPGT PE=1 SV=2	tr|F1S9P4|F1S9P4_PIG	O14772	37 kDa	0.35	0
D-aminoacyl-tRNA deacylase OS=Sus scrofa OX=9823 GN=DTD1 PE=1 SV=2	tr|F1SBH1|F1SBH1_PIG	Q8TEA8	23 kDa	0.35	0
Delta-1-pyrroline-5-carboxylate synthase OS=Sus scrofa OX=9823 GN=ALDH18A1 PE=1 SV=1	tr|F1SC47|F1SC47_PIG	P54886	87 kDa	0.35	INF
Acid phosphatase 6, lysophosphatidic OS=Sus scrofa OX=9823 GN=ACP6 PE=1 SV=1	tr|F1SDC2|F1SDC2_PIG	Q9NPH0	48 kDa	0.35	INF
Uncharacterized protein OS=Sus scrofa OX=9823 GN=CHMP5 PE=1 SV=3	tr|F1SE87|F1SE87_PIG		25 kDa	0.35	INF
Alpha-mannosidase OS=Sus scrofa OX=9823 GN=MAN2B1 PE=1 SV=3	tr|F1SEY1|F1SEY1_PIG	O00754	115 kDa	0.35	0
Corticosteroid 11-beta-dehydrogenase isozyme 1 OS=Sus scrofa OX=9823 GN=HSD11B1 PE=1 SV=3	tr|F1SF47|F1SF47_PIG	P28845	32 kDa	0.35	0
Phosphopantothenoylcysteine synthetase OS=Sus scrofa OX=9823 GN=PPCS PE=1 SV=1	tr|F1SF93|F1SF93_PIG	Q9HAB8	34 kDa	0.35	0
DnaJ homolog subfamily B member 11 OS=Sus scrofa OX=9823 GN=DNAJB11 PE=1 SV=1	tr|F1SFJ8|F1SFJ8_PIG	Q9UBS4	40 kDa	0.35	0
tRNA nucleotidyl transferase 1 OS=Sus scrofa OX=9823 GN=TRNT1 PE=3 SV=1	tr|F1SFL7|F1SFL7_PIG	Q96Q11	50 kDa	0.35	INF
PPFIA binding protein 1 OS=Sus scrofa OX=9823 GN=PPFIBP1 PE=4 SV=3	tr|F1SG93|F1SG93_PIG	Q86W92	117 kDa	0.35	INF
Eukaryotic translation initiation factor 3 subunit M OS=Sus scrofa OX=9823 GN=EIF3M PE=1 SV=1	tr|F1SGR0|F1SGR0_PIG	Q7L2H7	43 kDa	0.35	INF
Microtubule associated protein 1A OS=Sus scrofa OX=9823 GN=MAP1A PE=1 SV=3	tr|F1SI65|F1SI65_PIG	P78559	325 kDa	0.35	0
Protein phosphatase 1 regulatory subunit 3A OS=Sus scrofa OX=9823 GN=PPP1R3A PE=1 SV=3	tr|F1SJC2|F1SJC2_PIG	Q16821	123 kDa	0.35	0
Uncharacterized protein OS=Sus scrofa OX=9823 GN=ARPIN PE=1 SV=3	tr|F1SK02|F1SK02_PIG (+1)		25 kDa	0.35	INF
Ubiquitin carboxyl-terminal hydrolase OS=Sus scrofa OX=9823 GN=USP15 PE=1 SV=4	tr|F1SKD5|F1SKD5_PIG	Q9Y4E8	106 kDa	0.35	INF
Uncharacterized protein OS=Sus scrofa OX=9823 GN=FAM136A PE=1 SV=2	tr|F1SLD2|F1SLD2_PIG		17 kDa	0.35	INF
6-pyruvoyl tetrahydrobiopterin synthase OS=Sus scrofa OX=9823 GN=PTS PE=1 SV=1	tr|F1SM93|F1SM93_PIG	Q03393	17 kDa	0.35	0
V-type proton ATPase subunit F OS=Sus scrofa OX=9823 GN=ATP6V1F PE=1 SV=1	tr|F1SMN6|F1SMN6_PIG	Q16864	13 kDa	0.35	INF
Serpin B8 isoform a OS=Sus scrofa OX=9823 GN=SERPINB8 PE=3 SV=3	tr|F1SMX7|F1SMX7_PIG	P50452	43 kDa	0.35	0
Peptidylprolyl isomerase OS=Sus scrofa OX=9823 GN=FKBP15 PE=1 SV=3	tr|F1SN89|F1SN89_PIG	Q5T1M5	125 kDa	0.35	0
Podocalyxin OS=Sus scrofa OX=9823 GN=PODXL PE=3 SV=4	tr|F1SNF3|F1SNF3_PIG	O00592	54 kDa	0.35	0
3-oxo-5-beta-steroid 4-dehydrogenase isoform 1 OS=Sus scrofa OX=9823 GN=AKR1D1 PE=1 SV=3	tr|F1SNJ5|F1SNJ5_PIG	P51857	37 kDa	0.35	INF
Popeye domain containing 2 OS=Sus scrofa OX=9823 GN=POPDC2 PE=4 SV=1	tr|F1SPB4|F1SPB4_PIG	Q9HBU9	41 kDa	0.35	0
Sulfite oxidase OS=Sus scrofa OX=9823 GN=SUOX PE=1 SV=3	tr|F1SPH2|F1SPH2_PIG	P51687	60 kDa	0.35	0.7
Cytochrome P450 2D6 OS=Sus scrofa OX=9823 GN=CYP2D25 PE=2 SV=2	tr|F1SRG4|F1SRG4_PIG	P10635	57 kDa	0.35	0
Uncharacterized protein OS=Sus scrofa OX=9823 GN=LOC110255172 PE=1 SV=2	tr|F1SSB1|F1SSB1_PIG		46 kDa	0.35	INF
Biliverdin reductase A OS=Sus scrofa OX=9823 GN=BLVRA PE=3 SV=2	tr|F1SSF5|F1SSF5_PIG	P53004	33 kDa	0.35	0
Longin domain-containing protein OS=Sus scrofa OX=9823 GN=YKT6 PE=1 SV=2	tr|F1SSG1|F1SSG1_PIG	O15498	19 kDa	0.35	INF
zf-Tim10_DDP domain-containing protein OS=Sus scrofa OX=9823 PE=4 SV=2	tr|F1SSK4|F1SSK4_PIG	Not present in human	15 kDa	0.35	INF
Chromosome 11 open reading frame 54 OS=Sus scrofa OX=9823 GN=C9H11orf54 PE=1 SV=2	tr|F1STK8|F1STK8_PIG	Not present in human	35 kDa	0.35	0
Cytochrome c oxidase assembly factor 4 homolog OS=Sus scrofa OX=9823 GN=COA4 PE=1 SV=1	tr|F1SUS8|F1SUS8_PIG	Q9NYJ1	10 kDa	0.35	0
KDEL motif-containing protein 2 OS=Sus scrofa OX=9823 GN=POGLUT3 PE=1 SV=3	tr|F1SV18|F1SV18_PIG	Q7Z4H8	59 kDa	0.35	0
Eukaryotic translation initiation factor 3 subunit I OS=Sus scrofa OX=9823 GN=EIF3I PE=1 SV=4	tr|F1SV90|F1SV90_PIG	Q13347	31 kDa	0.35	0
ADP/ATP translocase 2 OS=Sus scrofa OX=9823 GN=SLC25A5 PE=1 SV=1	tr|F2Z565|F2Z565_PIG	P05141	33 kDa	0.35	0
Histone H2A OS=Sus scrofa OX=9823 GN=LOC102159655 PE=3 SV=1	tr|F2Z5L2|F2Z5L2_PIG	D6RCF2	14 kDa	0.35	INF
Threonine synthase like 2 OS=Sus scrofa OX=9823 GN=THNSL2 PE=1 SV=2	tr|I3L5P4|I3L5P4_PIG	Q86YJ6	54 kDa	0.35	0
Matrilin 1 OS=Sus scrofa OX=9823 GN=MATN1 PE=4 SV=3	tr|I3L5Q7|I3L5Q7_PIG	P21941	54 kDa	0.35	0
Fibrillarin OS=Sus scrofa OX=9823 GN=FBL PE=1 SV=3	tr|I3L5T3|I3L5T3_PIG	P22087	34 kDa	0.35	INF
Myosin heavy chain 15 OS=Sus scrofa OX=9823 GN=MYH15 PE=3 SV=3	tr|I3L675|I3L675_PIG	Q9Y2K3	223 kDa	0.35	INF
Vacuolar-sorting protein SNF8 OS=Sus scrofa OX=9823 GN=SNF8 PE=1 SV=1	tr|I3L6X7|I3L6X7_PIG	Q96H20	29 kDa	0.35	0
Ribonucloprotein OS=Sus scrofa OX=9823 GN=SNU13 PE=3 SV=1	tr|I3L7T5|I3L7T5_PIG	P55769	14 kDa	0.35	0
Tyrosine--tRNA ligase OS=Sus scrofa OX=9823 GN=YARS1 PE=1 SV=2	tr|I3L804|I3L804_PIG	P54577	59 kDa	0.35	0
Galectin OS=Sus scrofa OX=9823 GN=LGALSL PE=1 SV=1	tr|I3L8J2|I3L8J2_PIG	Q3ZCW2	19 kDa	0.35	INF
Coronin OS=Sus scrofa OX=9823 GN=CORO6 PE=3 SV=3	tr|I3L9X0|I3L9X0_PIG	Q6QEF8	53 kDa	0.35	0
Methionyl-tRNA synthetase OS=Sus scrofa OX=9823 GN=MARS1 PE=3 SV=2	tr|I3LA63|I3LA63_PIG (+1)	P56192	107 kDa	0.35	0
Enolase superfamily member 1 OS=Sus scrofa OX=9823 GN=ENOSF1 PE=1 SV=2	tr|I3LC92|I3LC92_PIG	Q7L5Y1	50 kDa	0.35	INF
DNA-directed RNA polymerases I, II, and III subunit RPABC3 OS=Sus scrofa OX=9823 GN=POLR2H PE=1 SV=1	tr|I3LCB2|I3LCB2_PIG	P52434	17 kDa	0.35	0
Peroxidasin OS=Sus scrofa OX=9823 GN=PXDN PE=1 SV=2	tr|I3LDA4|I3LDA4_PIG	Q92626	169 kDa	0.35	INF
Histone deacetylase 10 OS=Sus scrofa OX=9823 GN=HDAC10 PE=1 SV=2	tr|I3LDD6|I3LDD6_PIG	Q969S8	69 kDa	0.35	INF
Uncharacterized protein OS=Sus scrofa OX=9823 GN=AOX1 PE=4 SV=2	tr|I3LDH5|I3LDH5_PIG		148 kDa	0.35	0
Procollagen C-endopeptidase enhancer OS=Sus scrofa OX=9823 GN=PCOLCE PE=1 SV=1	tr|I3LEE6|I3LEE6_PIG	Q15113	50 kDa	0.35	INF
Protein phosphatase 1 regulatory subunit OS=Sus scrofa OX=9823 GN=PPP1R12C PE=4 SV=3	tr|I3LEG2|I3LEG2_PIG	Q9BZL4	83 kDa	0.35	INF
Beta-galactosidase OS=Sus scrofa OX=9823 GN=GLB1 PE=1 SV=3	tr|I3LGI9|I3LGI9_PIG	P16278	69 kDa	0.35	INF
Actin-related protein 10 OS=Sus scrofa OX=9823 GN=ACTR10 PE=1 SV=1	tr|I3LHK5|I3LHK5_PIG	P14618	46 kDa	0.35	INF
Pleckstrin homology like domain family B member 1 OS=Sus scrofa OX=9823 GN=PHLDB1 PE=4 SV=3	tr|I3LI25|I3LI25_PIG	Q86UU1	171 kDa	0.35	0
Inositol-1-monophosphatase OS=Sus scrofa OX=9823 GN=CIDEA PE=3 SV=3	tr|I3LIH2|I3LIH2_PIG	E5RGY4	31 kDa	0.35	0
UDP-glucose 6-dehydrogenase OS=Sus scrofa OX=9823 GN=UGDH PE=1 SV=1	tr|I3LIM2|I3LIM2_PIG	O60701	55 kDa	0.35	INF
Non-specific cytotoxic cell receptor protein 1 homolog (zebrafish) OS=Sus scrofa OX=9823 GN=NCCRP1 PE=4 SV=2	tr|I3LR13|I3LR13_PIG	Q6ZVX7	33 kDa	0.35	0
HIG1 domain-containing protein OS=Sus scrofa OX=9823 GN=HIGD2A PE=4 SV=1	tr|I3LSP3|I3LSP3_PIG	Q9BW72	12 kDa	0.35	0
Acyl-CoA synthetase medium chain family member 4 OS=Sus scrofa OX=9823 GN=ACSM4 PE=1 SV=2	tr|I3LSY0|I3LSY0_PIG	P0C7M7	65 kDa	0.35	0
Chromosome 19 open reading frame 25 OS=Sus scrofa OX=9823 GN=C2H19orf25 PE=4 SV=2	tr|I3LT16|I3LT16_PIG	Not present in human	14 kDa	0.35	0
RAS like proto-oncogene B OS=Sus scrofa OX=9823 GN=RALB PE=1 SV=2	tr|I3LV17|I3LV17_PIG	P11234	23 kDa	0.35	0
Desmocollin 2 OS=Sus scrofa OX=9823 GN=DSC2 PE=1 SV=3	tr|I3LVH8|I3LVH8_PIG	Q02487	95 kDa	0.35	INF
Vacuolar protein sorting-associated protein 28 homolog OS=Sus scrofa OX=9823 GN=VPS28 PE=1 SV=1	tr|K7GM88|K7GM88_PIG	Q9UK41	25 kDa	0.35	INF
TACC_C domain-containing protein OS=Sus scrofa OX=9823 GN=TACC2 PE=4 SV=3	tr|K7GT58|K7GT58_PIG	O95359	86 kDa	0.35	0
Cyclin-dependent kinase 6 OS=Sus scrofa OX=9823 GN=CDK6 PE=1 SV=2	tr|K7GT60|K7GT60_PIG	Q00534	37 kDa	0.35	0
Integrin subunit alpha 6 OS=Sus scrofa OX=9823 GN=ITGA6 PE=1 SV=3	tr|K7GT68|K7GT68_PIG	P23229	119 kDa	0.35	0
Protogenin isoform X1 OS=Sus scrofa OX=9823 GN=SNRNP200 PE=1 SV=1	tr|K9J4V0|K9J4V0_PIG	O75643	245 kDa	0.35	0
Golgi phosphoprotein 3 OS=Sus scrofa OX=9823 GN=GOLPH3 PE=2 SV=1	tr|M3V855|M3V855_PIG	Q9H4A6	34 kDa	0.35	INF
G protein subunit alpha i3 OS=Sus scrofa OX=9823 GN=GNAI3 PE=1 SV=1	tr|Q06AS8|Q06AS8_PIG	P08754	41 kDa	0.35	INF
RHOB OS=Sus scrofa OX=9823 GN=RHOB PE=1 SV=1	tr|Q06AT8|Q06AT8_PIG	P62745	22 kDa	0.35	0
Proteasome subunit beta OS=Sus scrofa OX=9823 GN=PSMB9 PE=1 SV=1	tr|Q2PYM7|Q2PYM7_PIG	P28065	23 kDa	0.35	0
Ovarian and testicular apolipoprotein N OS=Sus scrofa OX=9823 GN=ApoN PE=1 SV=1	tr|Q68RU1|Q68RU1_PIG	Not present in human	29 kDa	0.35	0
MHC class II antigen OS=Sus scrofa OX=9823 GN=SLA-DRA1 PE=1 SV=1	tr|Q85ZW4|Q85ZW4_PIG	P01911	28 kDa	0.35	INF
26S proteasome regulatory subunit 8 OS=Sus scrofa OX=9823 GN=PSMC5 PE=2 SV=1	sp|P62197|PRS8_PIG	P62195	46 kDa	0.36	1.5
CUE domain-containing protein OS=Sus scrofa OX=9823 GN=TOLLIP PE=4 SV=2	tr|A0A287A3T1|A0A287A3T1_PIG	Not present in human	30 kDa	0.36	0.5
Epsin 2 OS=Sus scrofa OX=9823 GN=EPN2 PE=4 SV=1	tr|A0A287BB84|A0A287BB84_PIG	O95208	67 kDa	0.36	0.4
Medium-chain-specific acyl-CoA dehydrogenase, mitochondrial OS=Sus scrofa OX=9823 GN=ACADM PE=3 SV=2	tr|A0A2C9F350|A0A2C9F350_PIG	P11310	46 kDa	0.36	0.9
Tubulin alpha 4a OS=Sus scrofa OX=9823 GN=TUBA4A PE=1 SV=1	tr|A0A5G2R655|A0A5G2R655_PIG	P68366	68 kDa	0.36	0.7
Importin N-terminal domain-containing protein OS=Sus scrofa OX=9823 GN=IPO5 PE=1 SV=1	tr|A0A5G2RIC0|A0A5G2RIC0_PIG	O00410	127 kDa	0.36	1.3
Serpin family G member 1 OS=Sus scrofa OX=9823 GN=SERPING1 PE=1 SV=1	tr|A0A5K1UE53|A0A5K1UE53_PIG (+1)	P05155	54 kDa	0.36	3
Histone H2A OS=Sus scrofa OX=9823 GN=LOC100154071 PE=3 SV=1	tr|F1RPL1|F1RPL1_PIG	P04908	14 kDa	0.36	0.9
Regucalcin OS=Sus scrofa OX=9823 GN=RGN PE=4 SV=2	tr|F1RWY0|F1RWY0_PIG	Q15493	33 kDa	0.36	0.6
Mitochondrial import inner membrane translocase subunit OS=Sus scrofa OX=9823 GN=TIMM8A PE=1 SV=1	tr|F1S1L1|F1S1L1_PIG	O60220	11 kDa	0.36	1.2
Uroporphyrinogen decarboxylase OS=Sus scrofa OX=9823 GN=UROD PE=1 SV=2	tr|F1S365|F1S365_PIG	P06132	41 kDa	0.36	0.3
Integrin beta-1-binding protein 2 OS=Sus scrofa OX=9823 GN=ITGB1BP2 PE=4 SV=2	tr|I3LGH0|I3LGH0_PIG	Q9UKP3	38 kDa	0.36	1.6
UMP-CMP kinase OS=Sus scrofa OX=9823 GN=CMPK1 PE=1 SV=1	sp|Q29561|KCY_PIG	P30085	22 kDa	0.37	1.3
Stathmin OS=Sus scrofa OX=9823 GN=STMN1 PE=2 SV=3	sp|Q6DUB7|STMN1_PIG	P16949	17 kDa	0.37	0.2
Proliferation-associated 2G4 OS=Sus scrofa OX=9823 GN=PA2G4 PE=1 SV=1	tr|A0A286ZYQ6|A0A286ZYQ6_PIG	Q9UQ80	41 kDa	0.37	1.4
ATP-dependent 6-phosphofructokinase OS=Sus scrofa OX=9823 GN=PFKL PE=1 SV=2	tr|A0A286ZZL7|A0A286ZZL7_PIG	P17858	82 kDa	0.37	1.4
Protein kinase C and casein kinase substrate in neurons 2 OS=Sus scrofa OX=9823 GN=PACSIN2 PE=1 SV=1	tr|A0A287A178|A0A287A178_PIG	Q9UNF0	61 kDa	0.37	0.6
SAMM50 sorting and assembly machinery component OS=Sus scrofa OX=9823 GN=SAMM50 PE=1 SV=1	tr|A0A287A9I6|A0A287A9I6_PIG (+1)	Q9Y512	52 kDa	0.37	0.7
Peptidylprolyl isomerase OS=Sus scrofa OX=9823 GN=FKBP2 PE=1 SV=1	tr|A0A287AA25|A0A287AA25_PIG (+1)	P26885	15 kDa	0.37	0.7
SERPIN domain-containing protein OS=Sus scrofa OX=9823 GN=SERPINA3-2 PE=1 SV=2	tr|A0A287ARJ8|A0A287ARJ8_PIG	Not present in human	51 kDa	0.37	1.5
Ferrochelatase OS=Sus scrofa OX=9823 GN=FECH PE=1 SV=1	tr|A0A287B3T2|A0A287B3T2_PIG	P22830	52 kDa	0.37	0.7
Dynein cytoplasmic 1 heavy chain 1 OS=Sus scrofa OX=9823 GN=DYNC1H1 PE=1 SV=2	tr|A0A287B9W3|A0A287B9W3_PIG	Q14204	532 kDa	0.37	1.3
KN motif and ankyrin repeat domains 2 OS=Sus scrofa OX=9823 GN=KANK2 PE=4 SV=2	tr|A0A287BAC9|A0A287BAC9_PIG	Q63ZY3	106 kDa	0.37	0.6
Poly(rC) binding protein 2 OS=Sus scrofa OX=9823 GN=PCBP2 PE=1 SV=1	tr|A0A5G2QGE1|A0A5G2QGE1_PIG	Q15366	39 kDa	0.37	0.7
Pyrophosphatase (inorganic) 1 OS=Sus scrofa OX=9823 GN=PPA1 PE=1 SV=1	tr|A0A5G2QKC9|A0A5G2QKC9_PIG	Q15181	33 kDa	0.37	1.7
Signal transducing adaptor molecule OS=Sus scrofa OX=9823 GN=STAM PE=1 SV=1	tr|A0A5G2RE13|A0A5G2RE13_PIG	Q92783	58 kDa	0.37	0.3
Tropomyosin alpha-3 chain OS=Sus scrofa OX=9823 GN=TPM3 PE=1 SV=1	tr|A0A5G2RJ89|A0A5G2RJ89_PIG	P06753	33 kDa	0.37	1.3
Proteasome subunit beta OS=Sus scrofa OX=9823 GN=PSMB6 PE=1 SV=2	tr|F1RFV5|F1RFV5_PIG	P28072	26 kDa	0.37	0.3
Protein phosphatase 1 regulatory subunit OS=Sus scrofa OX=9823 GN=PPP1R12B PE=1 SV=3	tr|F1S5B0|F1S5B0_PIG	O60237	109 kDa	0.37	1.2
Tubulin tyrosine ligase like 12 OS=Sus scrofa OX=9823 GN=TTLL12 PE=1 SV=4	tr|F1SJR7|F1SJR7_PIG	Q14166	66 kDa	0.37	1.6
RuvB-like helicase OS=Sus scrofa OX=9823 GN=RUVBL1 PE=1 SV=3	tr|F1SPF6|F1SPF6_PIG (+1)	Q9Y265	50 kDa	0.37	1.5
Leukocyte elastase inhibitor OS=Sus scrofa OX=9823 GN=SERPINB1 PE=3 SV=2	tr|F2Z5B1|F2Z5B1_PIG	P30740	46 kDa	0.37	0.8
Isocitrate dehydrogenase [NAD] subunit, mitochondrial OS=Sus scrofa OX=9823 GN=IDH3B PE=1 SV=1	tr|Q1G1K7|Q1G1K7_PIG	O43837	42 kDa	0.37	1.2
Cardiac phospholamban OS=Sus scrofa OX=9823 GN=PLN PE=1 SV=1	sp|P61013|PPLA_PIG	P26678	6 kDa	0.38	1.3
Epoxide hydrolase 1 OS=Sus scrofa OX=9823 GN=EPHX1 PE=2 SV=1	sp|P79381|HYEP_PIG	P07099	52 kDa	0.38	1.7
Dystroglycan OS=Sus scrofa OX=9823 GN=DAG1 PE=2 SV=2	sp|Q29243|DAG1_PIG	Q14118	95 kDa	0.38	1.2
Acyl-CoA synthetase family member 3 OS=Sus scrofa OX=9823 GN=ACSF3 PE=4 SV=2	tr|A0A286ZYB0|A0A286ZYB0_PIG	Q53FZ2	78 kDa	0.38	1.4
Caveolae associated protein 1 OS=Sus scrofa OX=9823 GN=CAVIN1 PE=4 SV=1	tr|A0A286ZZ97|A0A286ZZ97_PIG	Q6NZI2	50 kDa	0.38	0.7
Acetyl-coenzyme A synthetase OS=Sus scrofa OX=9823 GN=ACSS1 PE=1 SV=1	tr|A0A287AT39|A0A287AT39_PIG	Q7Z5G3	76 kDa	0.38	1.3
Uncharacterized protein OS=Sus scrofa OX=9823 GN=ANK2 PE=1 SV=2	tr|A0A287AUI5|A0A287AUI5_PIG		204 kDa	0.38	0.5
Uncharacterized protein OS=Sus scrofa OX=9823 GN=FGD4 PE=1 SV=1	tr|A0A287B878|A0A287B878_PIG		160 kDa	0.38	1.4
Clathrin light chain OS=Sus scrofa OX=9823 GN=CLTB PE=1 SV=1	tr|A0A287BG47|A0A287BG47_PIG	P09497	23 kDa	0.38	0.3
Arachidonate 15-lipoxygenase OS=Sus scrofa OX=9823 GN=ALOX15 PE=3 SV=2	tr|A0A2C9F3G7|A0A2C9F3G7_PIG (+1)	P16050	85 kDa	0.38	0.3
Myopalladin OS=Sus scrofa OX=9823 GN=MYPN PE=4 SV=1	tr|A0A480EA26|A0A480EA26_PIG	Q86TC9	145 kDa	0.38	0.6
Alpha-enolase isoform 1 OS=Sus scrofa OX=9823 GN=ENO1 PE=1 SV=1	tr|A0A480WPU1|A0A480WPU1_PIG	P06733	47 kDa	0.38	1.2
Proteasome subunit alpha type OS=Sus scrofa OX=9823 GN=PSMA1 PE=1 SV=1	tr|A0A5G2QI19|A0A5G2QI19_PIG	P25786	30 kDa	0.38	0.4
Peroxiredoxin OS=Sus scrofa OX=9823 GN=PRDX3 PE=1 SV=1	tr|A0A5G2QKD9|A0A5G2QKD9_PIG	P30048	28 kDa	0.38	0.5
Aldehyde dehydrogenase 1 family member A2 OS=Sus scrofa OX=9823 GN=ALDH1A2 PE=1 SV=1	tr|A0A5G2RN58|A0A5G2RN58_PIG (+2)	O94788	58 kDa	0.38	2
Nidogen 1 OS=Sus scrofa OX=9823 GN=NID1 PE=4 SV=4	tr|F1RGY5|F1RGY5_PIG	P14543	143 kDa	0.38	0.8
Endonuclease OS=Sus scrofa OX=9823 GN=ENDOG PE=1 SV=1	tr|F1RR64|F1RR64_PIG	Q14249	33 kDa	0.38	0.7
Sulfhydryl oxidase OS=Sus scrofa OX=9823 GN=QSOX1 PE=1 SV=2	tr|F1S682|F1S682_PIG	O00391	81 kDa	0.38	2.4
Uncharacterized protein OS=Sus scrofa OX=9823 GN=CPOX PE=4 SV=3	tr|F1SK95|F1SK95_PIG		49 kDa	0.38	0.5
S-methyl-5'-thioadenosine phosphorylase OS=Sus scrofa OX=9823 GN=MTAP PE=3 SV=4	tr|F1SNK3|F1SNK3_PIG	Q13126	40 kDa	0.38	0.2
Transmembrane protein 43 OS=Sus scrofa OX=9823 GN=TMEM43 PE=4 SV=4	tr|F1SPI1|F1SPI1_PIG	Q9BTV4	45 kDa	0.38	0.6
Serine/threonine-protein phosphatase 2A 55 kDa regulatory subunit B OS=Sus scrofa OX=9823 GN=PPP2R2A PE=3 SV=2	tr|F2Z509|F2Z509_PIG	P63151	53 kDa	0.38	1.3
WD repeat domain 44 OS=Sus scrofa OX=9823 GN=WDR44 PE=2 SV=1	tr|M3TYU5|M3TYU5_PIG	Q5JSH3	101 kDa	0.38	0.2
Annexin A2 OS=Sus scrofa OX=9823 GN=ANXA2 PE=1 SV=4	sp|P19620|ANXA2_PIG	A6NMY6	39 kDa	0.39	1.2
Prophenin and tritrpticin precursor (Fragment) OS=Sus scrofa OX=9823 PE=1 SV=1	sp|P51524|PF11_PIG	Not present in human	24 kDa	0.39	1.3
Prothrombin OS=Sus scrofa OX=9823 GN=F2 PE=2 SV=1	sp|Q19AZ8|THRB_PIG (+1)	P61247	70 kDa	0.39	0.6
4-trimethylaminobutyraldehyde dehydrogenase OS=Sus scrofa OX=9823 GN=ALDH9A1 PE=2 SV=2	sp|Q29228|AL9A1_PIG	P49189	54 kDa	0.39	1.4
ATPase inhibitor, mitochondrial OS=Sus scrofa OX=9823 GN=ATP5IF1 PE=1 SV=2	sp|Q29307|ATIF1_PIG	Q9UII2	12 kDa	0.39	1.4
Paraspeckle component 1 OS=Sus scrofa OX=9823 GN=PSPC1 PE=1 SV=1	tr|A0A286ZKW2|A0A286ZKW2_PIG	Q8WXF1	58 kDa	0.39	0.6
PDZ domain-containing protein OS=Sus scrofa OX=9823 GN=PSMD9 PE=1 SV=1	tr|A0A286ZLP7|A0A286ZLP7_PIG	O00233	24 kDa	0.39	0.6
LIM and senescent cell antigen-like-containing domain protein OS=Sus scrofa OX=9823 GN=LIMS2 PE=1 SV=1	tr|A0A286ZRD8|A0A286ZRD8_PIG	Q7Z4I7	40 kDa	0.39	0.3
Nipsnap homolog 3A OS=Sus scrofa OX=9823 GN=NIPSNAP3A PE=4 SV=1	tr|A0A286ZWQ9|A0A286ZWQ9_PIG	Q9UFN0	27 kDa	0.39	1.4
ATP synthase peripheral stalk-membrane subunit b OS=Sus scrofa OX=9823 GN=ATP5PB PE=1 SV=1	tr|A0A286ZYM6|A0A286ZYM6_PIG (+2)	P24539	29 kDa	0.39	1.3
Glypican 1 OS=Sus scrofa OX=9823 GN=GPC1 PE=1 SV=1	tr|A0A287ATH4|A0A287ATH4_PIG	P35052	61 kDa	0.39	0.3
Aldo_ket_red domain-containing protein OS=Sus scrofa OX=9823 GN=AKR1C1 PE=1 SV=1	tr|A0A287B0I7|A0A287B0I7_PIG	Q04828	35 kDa	0.39	0.3
Seryl-tRNA synthetase OS=Sus scrofa OX=9823 GN=SARS1 PE=1 SV=2	tr|A0A287BJI6|A0A287BJI6_PIG	P49591	61 kDa	0.39	1.7
Golgi reassembly stacking protein 2 OS=Sus scrofa OX=9823 GN=GORASP2 PE=1 SV=1	tr|A0A5G2QDE7|A0A5G2QDE7_PIG	Q9H8Y8	47 kDa	0.39	0.4
AP2-associated protein kinase 1 OS=Sus scrofa OX=9823 GN=AAK1 PE=4 SV=1	tr|A0A5G2QJD9|A0A5G2QJD9_PIG	Q2M2I8	141 kDa	0.39	0.4
Catechol O-methyltransferase OS=Sus scrofa OX=9823 GN=COMT PE=1 SV=1	tr|A0A5G2QXV8|A0A5G2QXV8_PIG	P21964	30 kDa	0.39	1.3
Aldehyde dehydrogenase 6 family member A1 OS=Sus scrofa OX=9823 GN=ALDH6A1 PE=1 SV=1	tr|A0A5G2RA17|A0A5G2RA17_PIG (+1)	Q02252	56 kDa	0.39	1.2
Histidine triad nucleotide binding protein 1 OS=Sus scrofa OX=9823 GN=HINT1 PE=1 SV=1	tr|F1RKI3|F1RKI3_PIG	P49773	14 kDa	0.39	1.3
Moesin OS=Sus scrofa OX=9823 GN=MSN PE=1 SV=3	tr|F1RTN3|F1RTN3_PIG	P26038	68 kDa	0.39	1.2
Glucosidase alpha, acid OS=Sus scrofa OX=9823 GN=GAA PE=1 SV=3	tr|F1RZ82|F1RZ82_PIG (+1)	P10253	104 kDa	0.39	0.2
von Willebrand factor OS=Sus scrofa OX=9823 GN=VWF PE=1 SV=3	tr|F1SL22|F1SL22_PIG	P04275	322 kDa	0.39	3.8
Uncharacterized protein OS=Sus scrofa OX=9823 GN=FASN PE=1 SV=3	tr|I3LC73|I3LC73_PIG		154 kDa	0.39	2.8
Nestin OS=Sus scrofa OX=9823 GN=NES PE=1 SV=2	tr|I3LNY6|I3LNY6_PIG	P48681	185 kDa	0.39	0.4
NADH-ubiquinone oxidoreductase chain 1 OS=Sus scrofa OX=9823 GN=MT-ND1 PE=1 SV=1	sp|O79874|NU1M_PIG (+1)	P03886	36 kDa	0.4	1.6
Aspartate aminotransferase, cytoplasmic OS=Sus scrofa OX=9823 GN=GOT1 PE=1 SV=3	sp|P00503|AATC_PIG	P17174	46 kDa	0.4	0.6
Ubiquitin carboxyl-terminal hydrolase isozyme L1 OS=Sus scrofa OX=9823 GN=UCHL1 PE=2 SV=1	sp|Q6SEG5|UCHL1_PIG	P09936	25 kDa	0.4	1.6
Sulfatase domain-containing protein OS=Sus scrofa OX=9823 GN=ARSA PE=1 SV=2	tr|A0A286ZTA6|A0A286ZTA6_PIG (+1)	P15289	53 kDa	0.4	0.1
40S ribosomal protein S19 OS=Sus scrofa OX=9823 GN=RPS19 PE=4 SV=1	tr|A0A286ZX70|A0A286ZX70_PIG	P39019	22 kDa	0.4	1.6
ATP synthase subunit delta, mitochondrial OS=Sus scrofa OX=9823 GN=ATP5F1D PE=1 SV=1	tr|A0A286ZYL7|A0A286ZYL7_PIG	P30049	17 kDa	0.4	1.2
Ras-related protein Rab-21 OS=Sus scrofa OX=9823 GN=TMEM19 PE=1 SV=1	tr|A0A287A4W6|A0A287A4W6_PIG	Q96HH6	24 kDa	0.4	0.5
Peroxiredoxin-2 OS=Sus scrofa OX=9823 GN=PRDX2 PE=1 SV=1	tr|A0A287A690|A0A287A690_PIG (+1)	P32119	26 kDa	0.4	0.9
Uncharacterized protein OS=Sus scrofa OX=9823 GN=HNRNPUL2 PE=1 SV=1	tr|A0A287APR9|A0A287APR9_PIG		86 kDa	0.4	0.4
Dolichyl-diphosphooligosaccharide--protein glycosyltransferase subunit 1 OS=Sus scrofa OX=9823 GN=RPN1 PE=3 SV=1	tr|A0A287BFC9|A0A287BFC9_PIG	P04843	67 kDa	0.4	1.3
Plasma serine protease inhibitor preproprotein OS=Sus scrofa OX=9823 GN=SERPINA5 PE=1 SV=1	tr|A0A480P2B4|A0A480P2B4_PIG (+1)	P05154	46 kDa	0.4	0.1
Prostaglandin reductase 2 OS=Sus scrofa OX=9823 GN=PTGR2 PE=1 SV=1	tr|A0A480YV73|A0A480YV73_PIG	Q8N8N7	38 kDa	0.4	1.3
Thioredoxin 2 OS=Sus scrofa OX=9823 GN=TXN2 PE=1 SV=1	tr|A0A5G2QPU1|A0A5G2QPU1_PIG	Q99757	19 kDa	0.4	0.5
Lipoprotein lipase OS=Sus scrofa OX=9823 GN=LPL PE=3 SV=1	tr|A0A5G2R179|A0A5G2R179_PIG	P06858	51 kDa	0.4	1.9
Cullin associated and neddylation dissociated 1 OS=Sus scrofa OX=9823 GN=CAND1 PE=1 SV=1	tr|A0A5G2RAC7|A0A5G2RAC7_PIG	Q86VP6	136 kDa	0.4	1.5
Translocated promoter region, nuclear basket protein OS=Sus scrofa OX=9823 GN=TPR PE=1 SV=4	tr|F1S300|F1S300_PIG	P12270	267 kDa	0.4	0.5
Far upstream element binding protein 1 OS=Sus scrofa OX=9823 GN=FUBP1 PE=1 SV=3	tr|F1S9S9|F1S9S9_PIG	Q96AE4	70 kDa	0.4	0.8
Uncharacterized protein OS=Sus scrofa OX=9823 GN=RAB10 PE=1 SV=1	tr|F2Z5F2|F2Z5F2_PIG		23 kDa	0.4	0.7
60S ribosomal protein L14 OS=Sus scrofa OX=9823 GN=RPL14 PE=1 SV=1	sp|A1XQU3|RL14_PIG (+2)	P50914	23 kDa	0.41	0.7
Tropomyosin alpha-1 chain OS=Sus scrofa OX=9823 GN=TPM1 PE=1 SV=2	sp|P42639|TPM1_PIG	P09493	33 kDa	0.41	1.3
Protein S100-A12 OS=Sus scrofa OX=9823 GN=S100A12 PE=1 SV=2	sp|P80310|S10AC_PIG	P80511	11 kDa	0.41	2.3
Haptoglobin OS=Sus scrofa OX=9823 GN=HP PE=1 SV=1	sp|Q8SPS7|HPT_PIG (+1)	P00738	38 kDa	0.41	0.3
Peptidase, mitochondrial processing alpha subunit OS=Sus scrofa OX=9823 GN=PMPCA PE=1 SV=2	tr|A0A286ZRT5|A0A286ZRT5_PIG	Q10713	66 kDa	0.41	1.4
Synergin gamma OS=Sus scrofa OX=9823 GN=SYNRG PE=4 SV=2	tr|A0A286ZZ60|A0A286ZZ60_PIG	Q9UMZ2	135 kDa	0.41	0.5
Protein disulfide isomerase family A member 2 OS=Sus scrofa OX=9823 GN=PDIA2 PE=1 SV=1	tr|A0A287A8T4|A0A287A8T4_PIG (+2)	Q13087	64 kDa	0.41	0.4
Glutathione peroxidase OS=Sus scrofa OX=9823 GN=GPX1 PE=3 SV=2	tr|A0A287AG70|A0A287AG70_PIG	P07203	23 kDa	0.41	0.8
Abhydrolase domain containing 10 OS=Sus scrofa OX=9823 GN=ABHD10 PE=1 SV=1	tr|A0A287AL53|A0A287AL53_PIG	Q9NUJ1	34 kDa	0.41	1.3
Cyclin dependent kinase 2 OS=Sus scrofa OX=9823 GN=CDK2 PE=1 SV=1	tr|A0A287ARC7|A0A287ARC7_PIG	P24941	39 kDa	0.41	0.4
ADP/ATP translocase 3 OS=Sus scrofa OX=9823 GN=SLC25A6 PE=3 SV=1	tr|A0A287AXS7|A0A287AXS7_PIG	P12236	33 kDa	0.41	0.7
Tubulin alpha chain OS=Sus scrofa OX=9823 GN=TUBA8 PE=1 SV=2	tr|A0A287B5H5|A0A287B5H5_PIG (+1)	Q9NY65	55 kDa	0.41	1.3
Ubiquinone biosynthesis O-methyltransferase, mitochondrial OS=Sus scrofa OX=9823 GN=FAXC PE=1 SV=1	tr|A0A287B6T3|A0A287B6T3_PIG	Q9NZJ6	41 kDa	0.41	0.7
Eukaryotic translation elongation factor 1 delta OS=Sus scrofa OX=9823 GN=EEF1D PE=4 SV=1	tr|A0A480KYX1|A0A480KYX1_PIG	P29692	65 kDa	0.41	0.6
Dual specificity protein phosphatase OS=Sus scrofa OX=9823 GN=DUSP3 PE=1 SV=1	tr|A0A480UG54|A0A480UG54_PIG	P51452	21 kDa	0.41	1.1
ATP-dependent (S)-NAD(P)H-hydrate dehydratase OS=Sus scrofa OX=9823 GN=NAXD PE=1 SV=1	tr|A0A480VIL3|A0A480VIL3_PIG	B4DKX7	35 kDa	0.41	0.7
Fumarylacetoacetase OS=Sus scrofa OX=9823 GN=FAH PE=1 SV=1	tr|A0A5G2QPJ7|A0A5G2QPJ7_PIG	P16930	53 kDa	0.41	0.5
Dihydrolipoyl dehydrogenase OS=Sus scrofa OX=9823 GN=DLD PE=1 SV=1	tr|A0A5G2QPK6|A0A5G2QPK6_PIG (+1)	P09622	53 kDa	0.41	1.1
Uncharacterized protein OS=Sus scrofa OX=9823 GN=DECR1 PE=1 SV=1	tr|A0A5G2R5W7|A0A5G2R5W7_PIG		38 kDa	0.41	0.8
Protein phosphatase methylesterase 1 OS=Sus scrofa OX=9823 GN=PPME1 PE=1 SV=1	tr|A0A5G2R744|A0A5G2R744_PIG	Q9Y570	44 kDa	0.41	0.4
U6 snRNA-associated Sm-like protein LSm2 OS=Sus scrofa OX=9823 GN=LSM2 PE=1 SV=1	tr|A5A8V8|A5A8V8_PIG	Q9Y333	11 kDa	0.41	3
Bifunctional epoxide hydrolase 2 OS=Sus scrofa OX=9823 GN=EPHX2 PE=4 SV=3	tr|F1RJS3|F1RJS3_PIG	P34913	63 kDa	0.41	1.7
Angiotensin-converting enzyme OS=Sus scrofa OX=9823 GN=ACE PE=1 SV=3	tr|F1RRW5|F1RRW5_PIG	Q9BYF1	150 kDa	0.41	1.8
Inter-alpha-trypsin inhibitor heavy chain H2 OS=Sus scrofa OX=9823 GN=ITIH2 PE=4 SV=4	tr|F1RUM4|F1RUM4_PIG	P19823	104 kDa	0.41	1.6
Phenylalanine--tRNA ligase alpha subunit OS=Sus scrofa OX=9823 GN=FARSA PE=1 SV=3	tr|F1SD97|F1SD97_PIG	Q9Y285	58 kDa	0.41	2.2
NADH:ubiquinone oxidoreductase subunit B10 OS=Sus scrofa OX=9823 GN=NDUFB10 PE=1 SV=2	tr|I3LDC3|I3LDC3_PIG	O96000	24 kDa	0.41	1.3
60S ribosomal protein L13 OS=Sus scrofa OX=9823 GN=RPL13 PE=1 SV=1	tr|I3LSD3|I3LSD3_PIG	P26373	24 kDa	0.41	1.3
WD repeat domain 1 OS=Sus scrofa OX=9823 GN=WDR1 PE=2 SV=1	tr|K9IVR7|K9IVR7_PIG	O75083	66 kDa	0.41	1.2
Peptidylprolyl isomerase OS=Sus scrofa OX=9823 GN=FKBP1A PE=1 SV=2	tr|Q2VTP6|Q2VTP6_PIG	P62942	25 kDa	0.41	0.7
Proteasome subunit beta type-7 OS=Sus scrofa OX=9823 GN=PSMB7 PE=2 SV=2	sp|A1XQU1|PSB7_PIG	Q99436	30 kDa	0.42	0.2
Uncharacterized protein OS=Sus scrofa OX=9823 GN=EIF5 PE=4 SV=1	tr|A0A287A7Q7|A0A287A7Q7_PIG		49 kDa	0.42	1.6
Microtubule actin crosslinking factor 1 OS=Sus scrofa OX=9823 GN=MACF1 PE=1 SV=1	tr|A0A287AEG1|A0A287AEG1_PIG (+1)	Q9UPN3	511 kDa	0.42	0.1
Thioredoxin domain-containing protein OS=Sus scrofa OX=9823 GN=ERP44 PE=1 SV=1	tr|A0A287B4Y1|A0A287B4Y1_PIG (+2)	Q9BS26	43 kDa	0.42	1.3
Tyrosine 3-monooxygenase/tryptophan 5-monooxygenase activation protein beta OS=Sus scrofa OX=9823 GN=YWHAB PE=1 SV=1	tr|A0A287BPX7|A0A287BPX7_PIG	Not present in human	30 kDa	0.42	1.2
S10_plectin domain-containing protein OS=Sus scrofa OX=9823 GN=RPS10 PE=1 SV=1	tr|A0A5G2QEC7|A0A5G2QEC7_PIG	P46783	21 kDa	0.42	0.4
Sarcoglycan delta OS=Sus scrofa OX=9823 GN=SGCD PE=1 SV=1	tr|A0A5K1VFF8|A0A5K1VFF8_PIG (+1)	Q92629	32 kDa	0.42	1.5
Fe-ADH domain-containing protein OS=Sus scrofa OX=9823 GN=ADHFE1 PE=1 SV=3	tr|F1RTZ1|F1RTZ1_PIG	Q8IWW8	50 kDa	0.42	0.8
26S proteasome non-ATPase regulatory subunit 3 OS=Sus scrofa OX=9823 GN=PSMD3 PE=1 SV=3	tr|F1RXA7|F1RXA7_PIG (+1)	O43242	61 kDa	0.42	0.4
NADH dehydrogenase ubiquinone iron-sulfur protein 2, mitochondrial isoform 1 OS=Sus scrofa OX=9823 GN=NDUFS2 PE=1 SV=2	tr|F1S1A8|F1S1A8_PIG	O75306	54 kDa	0.42	1.3
Cadherin 2 OS=Sus scrofa OX=9823 GN=CDH2 PE=1 SV=3	tr|F1SAM3|F1SAM3_PIG	P19022	100 kDa	0.42	0.8
Activated leukocyte cell adhesion molecule OS=Sus scrofa OX=9823 GN=ALCAM PE=1 SV=5	tr|F1SL34|F1SL34_PIG	Q13740	61 kDa	0.42	0.7
Tyrosine 3-monooxygenase/tryptophan 5-monooxygenase activation protein eta OS=Sus scrofa OX=9823 GN=YWHAH PE=1 SV=1	tr|F2Z4Y1|F2Z4Y1_PIG	Q04917	28 kDa	0.42	1.3
Caldesmon 1 OS=Sus scrofa OX=9823 GN=CALD1 PE=1 SV=2	tr|I3L650|I3L650_PIG	Q05682	94 kDa	0.42	1.2
S-adenosylmethionine synthase OS=Sus scrofa OX=9823 GN=MAT2A PE=1 SV=2	tr|I3LJR6|I3LJR6_PIG	P31153	41 kDa	0.42	0.6
Triokinase/FMN cyclase OS=Sus scrofa OX=9823 GN=TKFC PE=1 SV=2	sp|F1RKQ4|TKFC_PIG	Q3LXA3	59 kDa	0.43	0.6
5'-AMP-activated protein kinase catalytic subunit alpha-2 OS=Sus scrofa OX=9823 GN=PRKAA2 PE=2 SV=2	sp|Q28948|AAPK2_PIG	P54646	62 kDa	0.43	0.5
Elongation factor 1-alpha 2 OS=Sus scrofa OX=9823 GN=EEF1A2 PE=3 SV=1	tr|A0A286ZNV2|A0A286ZNV2_PIG	Q05639	63 kDa	0.43	1.2
AP-2 complex subunit mu OS=Sus scrofa OX=9823 GN=AP2M1 PE=1 SV=1	tr|A0A286ZU22|A0A286ZU22_PIG	Q96CW1	50 kDa	0.43	0.4
Histamine N-methyltransferase isoform 1 OS=Sus scrofa OX=9823 GN=HNMT PE=1 SV=1	tr|A0A287AA45|A0A287AA45_PIG	P50135	33 kDa	0.43	2.1
Inositol-1-monophosphatase OS=Sus scrofa OX=9823 GN=IMPA1 PE=3 SV=1	tr|A0A287AVN0|A0A287AVN0_PIG	P29218	30 kDa	0.43	0.6
Microfibril associated protein 4 OS=Sus scrofa OX=9823 GN=MFAP4 PE=4 SV=1	tr|A0A287AZP0|A0A287AZP0_PIG	P55083	34 kDa	0.43	0.4
Core histone macro-H2A OS=Sus scrofa OX=9823 GN=H2AFY PE=1 SV=2	tr|A0A287B3D7|A0A287B3D7_PIG	O75367	39 kDa	0.43	0.7
Dystrobrevin OS=Sus scrofa OX=9823 GN=DTNA PE=1 SV=2	tr|A0A287BEJ8|A0A287BEJ8_PIG	Q9Y4J8	79 kDa	0.43	0.6
Alpha-carbonic anhydrase domain-containing protein OS=Sus scrofa OX=9823 GN=CA4 PE=1 SV=1	tr|A0A5G2QT98|A0A5G2QT98_PIG (+1)	P22748	35 kDa	0.43	2.7
Adenosine deaminase OS=Sus scrofa OX=9823 GN=ADA PE=1 SV=1	tr|A0A5G2QU98|A0A5G2QU98_PIG	P00813	41 kDa	0.43	0.3
Uncharacterized protein OS=Sus scrofa OX=9823 GN=LOC100622780 PE=1 SV=1	tr|A0A5G2R1G6|A0A5G2R1G6_PIG		51 kDa	0.43	1.2
Translocase of outer mitochondrial membrane 40 OS=Sus scrofa OX=9823 GN=TOMM40 PE=4 SV=4	tr|F1RM44|F1RM44_PIG	O96008	35 kDa	0.43	0.4
Isocitrate dehydrogenase [NAD] subunit, mitochondrial OS=Sus scrofa OX=9823 GN=IDH3G PE=1 SV=3	tr|F1S297|F1S297_PIG	P51553	41 kDa	0.43	1.2
Peptidyl-prolyl cis-trans isomerase OS=Sus scrofa OX=9823 GN=PPIF PE=3 SV=2	tr|F1S2E3|F1S2E3_PIG	P30405	25 kDa	0.43	0.8
Uncharacterized protein OS=Sus scrofa OX=9823 GN=NDUFA13 PE=1 SV=4	tr|F1S6Q1|F1S6Q1_PIG		17 kDa	0.43	1.3
Arp2/3 complex 34 kDa subunit OS=Sus scrofa OX=9823 GN=ARPC2 PE=3 SV=4	tr|F1SS01|F1SS01_PIG	O15144	31 kDa	0.43	0.7
Proteasome subunit alpha type OS=Sus scrofa OX=9823 GN=PSMA6 PE=1 SV=1	tr|F2Z5N0|F2Z5N0_PIG	P60900	27 kDa	0.43	0.5
Poly(rC) binding protein 1 OS=Sus scrofa OX=9823 GN=PCBP1 PE=1 SV=1	tr|I3LEC2|I3LEC2_PIG	Q15365	38 kDa	0.43	0.8
Peptidyl-prolyl cis-trans isomerase OS=Sus scrofa OX=9823 GN=PIN1 PE=1 SV=1	tr|I3LLH5|I3LLH5_PIG	Q13526	18 kDa	0.43	1.3
Calsarcin 1 OS=Sus scrofa OX=9823 GN=MYOZ2 PE=2 SV=1	tr|Q1AG08|Q1AG08_PIG	Q9NPC6	30 kDa	0.43	1.1
Fatty acid-binding protein, liver OS=Sus scrofa OX=9823 GN=FABP1 PE=2 SV=1	sp|P49924|FABPL_PIG	P07148	14 kDa	0.44	0.3
60S ribosomal protein L23 OS=Sus scrofa OX=9823 GN=RPL23 PE=1 SV=1	sp|P62831|RL23_PIG	P62829	15 kDa	0.44	1.6
Cytochrome c oxidase subunit 7A1, mitochondrial OS=Sus scrofa OX=9823 GN=COX7A1 PE=3 SV=1	sp|Q8SPJ9|CX7A1_PIG	P24310	9 kDa	0.44	0.6
Calpastatin OS=Sus scrofa OX=9823 GN=CAST PE=1 SV=1	tr|A0A286ZNA7|A0A286ZNA7_PIG	P20810	81 kDa	0.44	0.7
KH-type splicing regulatory protein OS=Sus scrofa OX=9823 GN=KHSRP PE=1 SV=1	tr|A0A286ZY30|A0A286ZY30_PIG	Q92945	73 kDa	0.44	0.9
Isocitrate dehydrogenase [NADP] OS=Sus scrofa OX=9823 GN=IDH1 PE=1 SV=1	tr|A0A287A8M1|A0A287A8M1_PIG (+1)	O75874	51 kDa	0.44	1.3
Acyl-CoA synthetase family member 2 OS=Sus scrofa OX=9823 GN=ACSF2 PE=1 SV=1	tr|A0A287B7S7|A0A287B7S7_PIG	Q96CM8	68 kDa	0.44	1.3
Uncharacterized protein OS=Sus scrofa OX=9823 GN=CFH PE=4 SV=1	tr|A0A287BD18|A0A287BD18_PIG		139 kDa	0.44	0.6
3-ketoacyl-CoA thiolase, peroxisomal isoform X1 OS=Sus scrofa OX=9823 GN=ACAA1 PE=1 SV=1	tr|A0A480UJ69|A0A480UJ69_PIG	P09110	45 kDa	0.44	0.6
Protein SEC13 homolog OS=Sus scrofa OX=9823 GN=SEC13 PE=1 SV=1	tr|A0A480V9A7|A0A480V9A7_PIG (+1)	P55735	36 kDa	0.44	0.7
Corrinoid adenosyltransferase OS=Sus scrofa OX=9823 GN=MMAB PE=1 SV=1	tr|A0A5G2Q8H3|A0A5G2Q8H3_PIG	Q96EY8	27 kDa	0.44	0.9
Staphylococcal nuclease domain-containing protein OS=Sus scrofa OX=9823 GN=SND1 PE=1 SV=1	tr|A0A5G2QLY5|A0A5G2QLY5_PIG	Q7KZF4	102 kDa	0.44	2.7
S-(hydroxymethyl)glutathione dehydrogenase OS=Sus scrofa OX=9823 GN=ADH5 PE=1 SV=2	tr|F1S0C1|F1S0C1_PIG	P11766	41 kDa	0.44	0.5
Leucine rich pentatricopeptide repeat containing OS=Sus scrofa OX=9823 GN=LRPPRC PE=1 SV=2	tr|F1S5J1|F1S5J1_PIG	P42704	159 kDa	0.44	1.3
Uncharacterized protein OS=Sus scrofa OX=9823 GN=IBA57 PE=1 SV=2	tr|F1S5S1|F1S5S1_PIG		38 kDa	0.44	0.7
NADH:ubiquinone oxidoreductase subunit B3 OS=Sus scrofa OX=9823 GN=NDUFB3 PE=1 SV=2	tr|F1SI50|F1SI50_PIG	O43676	13 kDa	0.44	0.4
Pterin-4 alpha-carbinolamine dehydratase 1 OS=Sus scrofa OX=9823 GN=PCBD1 PE=1 SV=1	tr|F1SUB1|F1SUB1_PIG	P61457	12 kDa	0.44	0.4
Uncharacterized protein OS=Sus scrofa OX=9823 GN=TRIM63 PE=4 SV=3	tr|I3L5M6|I3L5M6_PIG		41 kDa	0.44	1.6
Cytochrome c oxidase subunit 4 isoform 1, mitochondrial OS=Sus scrofa OX=9823 GN=COX4I1 PE=1 SV=2	tr|I3LER5|I3LER5_PIG	P13073	20 kDa	0.44	1.2
Tripartite motif containing 55 OS=Sus scrofa OX=9823 GN=TRIM55 PE=4 SV=2	tr|I3LQP1|I3LQP1_PIG	Q9BYV6	59 kDa	0.44	0.8
L-lactate dehydrogenase B chain OS=Sus scrofa OX=9823 GN=LDHB PE=1 SV=3	sp|P00336|LDHB_PIG	P07195	37 kDa	0.45	0.7
Solute carrier family 25 member 13 OS=Sus scrofa OX=9823 GN=SLC25A13 PE=1 SV=2	tr|A0A286ZKD4|A0A286ZKD4_PIG	Q9UJS0	73 kDa	0.45	0.7
Methylmalonyl-CoA epimerase OS=Sus scrofa OX=9823 GN=MCEE PE=1 SV=1	tr|A0A286ZW02|A0A286ZW02_PIG	Q96PE7	19 kDa	0.45	0.7
HtrA serine peptidase 2 OS=Sus scrofa OX=9823 GN=HTRA2 PE=4 SV=2	tr|A0A287A6X5|A0A287A6X5_PIG	O43464	47 kDa	0.45	0.7
LanC like 1 OS=Sus scrofa OX=9823 GN=LANCL1 PE=1 SV=2	tr|A0A287B283|A0A287B283_PIG	O43813	47 kDa	0.45	0.6
Reticulon OS=Sus scrofa OX=9823 GN=RTN4 PE=1 SV=2	tr|A0A287B5Q4|A0A287B5Q4_PIG	Q9NQC3	130 kDa	0.45	0.5
Uncharacterized protein OS=Sus scrofa OX=9823 GN=LOC100622246 PE=1 SV=1	tr|A0A287BL83|A0A287BL83_PIG		31 kDa	0.45	0.8
Heterogeneous nuclear ribonucleoprotein M OS=Sus scrofa OX=9823 GN=HNRNPM PE=1 SV=2	tr|A0A287BL93|A0A287BL93_PIG	P52272	77 kDa	0.45	1.3
Mitogen-activated protein kinase OS=Sus scrofa OX=9823 GN=MAPK3 PE=3 SV=2	tr|A0A287BLM6|A0A287BLM6_PIG	P27361	42 kDa	0.45	2.1
H1 histone family member 0 OS=Sus scrofa OX=9823 GN=H1F0 PE=1 SV=1	tr|A0A287BQW3|A0A287BQW3_PIG	P07305	21 kDa	0.45	0.7
Hematopoietic cell-specific Lyn substrate 1 OS=Sus scrofa OX=9823 GN=HCLS1 PE=1 SV=1	tr|A0A480K0V3|A0A480K0V3_PIG (+2)	P14317	55 kDa	0.45	0.2
Protein-serine/threonine kinase OS=Sus scrofa OX=9823 GN=PDK4 PE=3 SV=1	tr|A0A5G2QX68|A0A5G2QX68_PIG (+1)	Q16654	47 kDa	0.45	2.1
Proteasome subunit beta OS=Sus scrofa OX=9823 GN=PSMB8 PE=1 SV=1	tr|A5D9J4|A5D9J4_PIG (+1)	P28062	31 kDa	0.45	0.2
Lamin B1 OS=Sus scrofa OX=9823 GN=LMNB1 PE=1 SV=2	tr|F1RKM0|F1RKM0_PIG	P20700	66 kDa	0.45	1.3
Serine and arginine rich splicing factor 3 OS=Sus scrofa OX=9823 GN=SRSF3 PE=1 SV=2	tr|F1RY92|F1RY92_PIG	P84103	19 kDa	0.45	0.6
Phosphoglucomutase 1 OS=Sus scrofa OX=9823 GN=PGM1 PE=1 SV=4	tr|F1S814|F1S814_PIG	P36871	62 kDa	0.45	1.2
Ceruloplasmin OS=Sus scrofa OX=9823 GN=CP PE=1 SV=4	tr|F1SKB1|F1SKB1_PIG	P00450	124 kDa	0.45	0.5
Olfactomedin like 3 OS=Sus scrofa OX=9823 GN=OLFML3 PE=1 SV=1	tr|H6UWK6|H6UWK6_PIG	Q9NRN5	46 kDa	0.45	2.8
Cytoskeleton-associated protein 1 OS=Sus scrofa OX=9823 GN=TBCB PE=1 SV=1	tr|Q8HXL4|Q8HXL4_PIG	Q99426	28 kDa	0.45	0.4
Long-chain specific acyl-CoA dehydrogenase, mitochondrial OS=Sus scrofa OX=9823 GN=ACADL PE=2 SV=1	sp|P79274|ACADL_PIG	P28330	48 kDa	0.46	0.7
LIM domain binding 3 OS=Sus scrofa OX=9823 GN=LDB3 PE=1 SV=1	tr|A0A286ZLT8|A0A286ZLT8_PIG	O75112	50 kDa	0.46	0.6
Eukaryotic translation initiation factor 5A OS=Sus scrofa OX=9823 GN=EIF5A PE=1 SV=1	tr|A0A286ZUV8|A0A286ZUV8_PIG	P63241	17 kDa	0.46	1.2
Transforming growth factor beta-1-induced transcript 1 protein OS=Sus scrofa OX=9823 GN=TGFB1I1 PE=1 SV=1	tr|A0A287A5A2|A0A287A5A2_PIG	O43294	49 kDa	0.46	1.5
G protein subunit beta 1 OS=Sus scrofa OX=9823 GN=GNB1 PE=4 SV=1	tr|A0A287A7Q3|A0A287A7Q3_PIG	P62873	37 kDa	0.46	0.7
Fibulin-1 OS=Sus scrofa OX=9823 GN=FBLN1 PE=1 SV=1	tr|A0A287AL89|A0A287AL89_PIG	P23142	89 kDa	0.46	2.4
Proteasome endopeptidase complex OS=Sus scrofa OX=9823 GN=PSMA6 PE=1 SV=2	tr|A0A287AVI5|A0A287AVI5_PIG	P60900	96 kDa	0.46	0.4
Protein kinase C substrate 80K-H OS=Sus scrofa OX=9823 GN=PRKCSH PE=1 SV=1	tr|A0A287B9A6|A0A287B9A6_PIG (+1)	P14314	57 kDa	0.46	0.6
Discs large MAGUK scaffold protein 1 OS=Sus scrofa OX=9823 GN=DLG1 PE=1 SV=1	tr|A0A287BTJ2|A0A287BTJ2_PIG (+1)	Q12959	103 kDa	0.46	1.7
Dynein light chain OS=Sus scrofa OX=9823 GN=DYNLL2 PE=1 SV=1	tr|A0A5G2R8I6|A0A5G2R8I6_PIG (+1)	Q96FJ2	15 kDa	0.46	1.3
Phosphoglycerate mutase OS=Sus scrofa OX=9823 GN=PGAM2 PE=1 SV=1	tr|B5KJG2|B5KJG2_PIG	P15259	29 kDa	0.46	1.2
Sarcalumenin OS=Sus scrofa OX=9823 GN=SRL PE=1 SV=3	tr|F1RK48|F1RK48_PIG	Q86TD4	87 kDa	0.46	1.1
Trimethyllysine dioxygenase, mitochondrial isoform 1 OS=Sus scrofa OX=9823 GN=TMLHE PE=1 SV=3	tr|F1RZS1|F1RZS1_PIG	Q9NVH6	50 kDa	0.46	0.4
Coenzyme Q10A OS=Sus scrofa OX=9823 GN=COQ10A PE=1 SV=2	tr|F1SLZ5|F1SLZ5_PIG	Q96MF6	27 kDa	0.46	1.6
Peroxiredoxin OS=Sus scrofa OX=9823 GN=PRDX4 PE=1 SV=1	tr|F1SQ01|F1SQ01_PIG	Q13162	31 kDa	0.46	0.5
Cathepsin C OS=Sus scrofa OX=9823 GN=CTSC PE=1 SV=1	tr|F1STR1|F1STR1_PIG	P53634	52 kDa	0.46	0.2
Proteasome subunit alpha type OS=Sus scrofa OX=9823 GN=PSMA2 PE=1 SV=1	tr|I3LAB6|I3LAB6_PIG	P25787	26 kDa	0.46	0.4
Serine/threonine-protein phosphatase PP1-beta catalytic subunit OS=Sus scrofa OX=9823 GN=PPP1CB PE=1 SV=3	sp|P61292|PP1B_PIG	P62140	37 kDa	0.47	1.3
Uncharacterized protein OS=Sus scrofa OX=9823 GN=LAMA2 PE=1 SV=1	tr|A0A287A027|A0A287A027_PIG		228 kDa	0.47	0.7
Enoyl-CoA hydratase, mitochondrial OS=Sus scrofa OX=9823 GN=ECHS1 PE=1 SV=2	tr|A0A287AA21|A0A287AA21_PIG	P30084	35 kDa	0.47	1.2
40S ribosomal protein S27 OS=Sus scrofa OX=9823 GN=RPS27 PE=1 SV=1	tr|A0A287BF06|A0A287BF06_PIG	P42677	9 kDa	0.47	0.4
Chloride intracellular channel protein OS=Sus scrofa OX=9823 GN=CLIC5 PE=3 SV=2	tr|A0A287BH49|A0A287BH49_PIG	Q9NZA1	45 kDa	0.47	0.8
Sulfurtransferase OS=Sus scrofa OX=9823 GN=TST PE=1 SV=2	tr|A0A287BPT5|A0A287BPT5_PIG	Q16762	39 kDa	0.47	1.2
Fibulin-5 OS=Sus scrofa OX=9823 GN=FBLN5 PE=1 SV=1	tr|A0A480ZQ94|A0A480ZQ94_PIG	Q9UBX5	50 kDa	0.47	1.2
Transglutaminase 2 OS=Sus scrofa OX=9823 GN=TGM2 PE=1 SV=1	tr|A0A5G2R416|A0A5G2R416_PIG	P21980	78 kDa	0.47	1.2
Biglycan OS=Sus scrofa OX=9823 GN=BGN PE=1 SV=1	tr|A0A5K1UKC5|A0A5K1UKC5_PIG	P21810	38 kDa	0.47	1.5
CAP-Gly domain containing linker protein 1 OS=Sus scrofa OX=9823 GN=CLIP1 PE=4 SV=4	tr|F1REW5|F1REW5_PIG	P30622	248 kDa	0.47	0.6
Glutaredoxin 5 OS=Sus scrofa OX=9823 GN=GLRX5 PE=1 SV=1	tr|F1SAR5|F1SAR5_PIG	Q86SX6	17 kDa	0.47	1.2
Proteasome activator complex subunit 2 OS=Sus scrofa OX=9823 GN=PSME2 PE=4 SV=4	tr|F1SGM3|F1SGM3_PIG	Q9UL46	29 kDa	0.47	0.8
Phosphoglucomutase 5 OS=Sus scrofa OX=9823 GN=PGM5 PE=1 SV=3	tr|F1SJE6|F1SJE6_PIG	Q15124	62 kDa	0.47	1.2
Prohibitin OS=Sus scrofa OX=9823 GN=PHB PE=1 SV=3	tr|F2Z543|F2Z543_PIG	P35232	30 kDa	0.47	0.7
Eukaryotic peptide chain release factor GTP-binding subunit ERF3A isoform 1 OS=Sus scrofa OX=9823 GN=GSPT1 PE=1 SV=2	tr|I3LNK5|I3LNK5_PIG	P15170	69 kDa	0.47	0.4
Calpain-1 catalytic subunit OS=Sus scrofa OX=9823 GN=CAPN1 PE=2 SV=3	sp|P35750|CAN1_PIG	P07384	82 kDa	0.48	1.3
Cytochrome c oxidase subunit 2 OS=Sus scrofa OX=9823 GN=MT-CO2 PE=3 SV=1	sp|P50667|COX2_PIG	P00403	26 kDa	0.48	1.2
PRA1 family protein 3 OS=Sus scrofa OX=9823 GN=ARL6IP5 PE=2 SV=1	sp|Q56P28|PRAF3_PIG	O75915	22 kDa	0.48	1.2
Serine/threonine-protein kinase OSR1 OS=Sus scrofa OX=9823 GN=OXSR1 PE=2 SV=1	sp|Q863I2|OXSR1_PIG (+1)	O95747	58 kDa	0.48	1.3
Heme-binding protein 1 OS=Sus scrofa OX=9823 GN=HEBP1 PE=4 SV=1	tr|A0A286ZSH3|A0A286ZSH3_PIG	Q9NRV9	24 kDa	0.48	0.4
Vacuolar protein sorting 25 homolog OS=Sus scrofa OX=9823 GN=VPS25 PE=1 SV=1	tr|A0A287AAM6|A0A287AAM6_PIG	Q9BRG1	24 kDa	0.48	0.2
Importin subunit alpha OS=Sus scrofa OX=9823 GN=KPNA4 PE=1 SV=1	tr|A0A287ATD3|A0A287ATD3_PIG (+1)	O00629	58 kDa	0.48	1.6
SERPIN domain-containing protein OS=Sus scrofa OX=9823 GN=LOC396684 PE=3 SV=1	tr|A0A287BM11|A0A287BM11_PIG (+1)	G3V5I3	45 kDa	0.48	1.8
Aminopeptidase OS=Sus scrofa OX=9823 GN=NPEPPS PE=1 SV=1	tr|A0A5G2QES1|A0A5G2QES1_PIG (+1)	P55786	103 kDa	0.48	1.3
Proteasome subunit beta OS=Sus scrofa OX=9823 GN=PSMB2 PE=1 SV=1	tr|A0A5G2R6J1|A0A5G2R6J1_PIG	P49721	23 kDa	0.48	0.4
Aminopeptidase-like 1 OS=Sus scrofa OX=9823 GN=NPEPL1 PE=1 SV=1	tr|A5GFT5|A5GFT5_PIG	Q8NDH3	56 kDa	0.48	0.4
5-aminoimidazole-4-carboxamide ribonucleotide formyltransferase/IMP cyclohydrolase OS=Sus scrofa OX=9823 GN=ATIC PE=1 SV=1	tr|B3VMR0|B3VMR0_PIG	P31939	64 kDa	0.48	1.7
Coiled-coil-helix-coiled-coil-helix domain-containing protein 2 OS=Sus scrofa OX=9823 GN=CHCHD2 PE=1 SV=2	tr|F1RIU9|F1RIU9_PIG	Q9Y6H1	16 kDa	0.48	1.3
Dihydropyrimidinase like 2 OS=Sus scrofa OX=9823 GN=DPYSL2 PE=1 SV=4	tr|F1RJT3|F1RJT3_PIG	Q16555	69 kDa	0.48	1.2
Receptor expression-enhancing protein OS=Sus scrofa OX=9823 GN=REEP5 PE=1 SV=1	tr|F1RLG5|F1RLG5_PIG	Q00765	21 kDa	0.48	0.7
Cobl domain-containing protein OS=Sus scrofa OX=9823 PE=4 SV=3	tr|F1SF13|F1SF13_PIG	Not present in human	44 kDa	0.48	0.4
Proteasome endopeptidase complex OS=Sus scrofa OX=9823 GN=PSMA5 PE=3 SV=2	tr|F2Z5K2|F2Z5K2_PIG	P28066	25 kDa	0.48	0.5
Stress induced phosphoprotein 1 OS=Sus scrofa OX=9823 GN=STIP1 PE=4 SV=2	tr|I3LNG8|I3LNG8_PIG	P31948	62 kDa	0.48	0.8
Dolichyl-diphosphooligosaccharide--protein glycosyltransferase subunit 2 OS=Sus scrofa OX=9823 GN=RPN2 PE=1 SV=3	tr|I3LRG0|I3LRG0_PIG	P04844	72 kDa	0.48	1.4
Myotrophin OS=Sus scrofa OX=9823 GN=MTPN PE=1 SV=1	tr|K9IVW4|K9IVW4_PIG	P58546	13 kDa	0.48	1.2
Vesicle-associated membrane protein-associated protein B OS=Sus scrofa OX=9823 GN=VAPB PE=3 SV=1	sp|A5GFS8|VAPB_PIG	O95292	27 kDa	0.49	0.8
Transthyretin OS=Sus scrofa OX=9823 GN=TTR PE=1 SV=1	sp|P50390|TTHY_PIG (+1)	P02766	16 kDa	0.49	0.6
Metaxin-2 OS=Sus scrofa OX=9823 GN=MTX2 PE=2 SV=1	sp|Q2L969|MTX2_PIG	O75431	30 kDa	0.49	0.8
Proteasome subunit beta OS=Sus scrofa OX=9823 GN=PSMB3 PE=1 SV=1	tr|A0A286ZN52|A0A286ZN52_PIG	P49720	23 kDa	0.49	0.4
Uncharacterized protein OS=Sus scrofa OX=9823 GN=MTCH2 PE=3 SV=2	tr|A0A286ZU97|A0A286ZU97_PIG		37 kDa	0.49	0.7
G protein subunit alpha o1 OS=Sus scrofa OX=9823 GN=GNAO1 PE=1 SV=1	tr|A0A287A9G3|A0A287A9G3_PIG	P09471	40 kDa	0.49	0.5
Glycine cleavage system H protein OS=Sus scrofa OX=9823 GN=GCSH PE=3 SV=1	tr|A0A287BA24|A0A287BA24_PIG	P23434	19 kDa	0.49	0.5
Proteasome 26S subunit, non-ATPase 4 OS=Sus scrofa OX=9823 GN=PSMD4 PE=1 SV=1	tr|A0A288CG47|A0A288CG47_PIG	P55036	41 kDa	0.49	0.8
Phosphate carrier protein, mitochondrial isoform a OS=Sus scrofa OX=9823 GN=SLC25A3 PE=1 SV=1	tr|A0A5G2Q9K8|A0A5G2Q9K8_PIG	Q00325	45 kDa	0.49	1.2
Acetyltransferase component of pyruvate dehydrogenase complex OS=Sus scrofa OX=9823 GN=DLAT PE=1 SV=1	tr|A0A5G2QK83|A0A5G2QK83_PIG	P10515	68 kDa	0.49	0.8
GMP reductase OS=Sus scrofa OX=9823 GN=GMPR PE=1 SV=1	tr|A0A5G2R384|A0A5G2R384_PIG	P36959	37 kDa	0.49	0.6
Sorting nexin OS=Sus scrofa OX=9823 GN=SNX9 PE=1 SV=1	tr|A0A5G2RCL6|A0A5G2RCL6_PIG	Q9Y5X1	69 kDa	0.49	0.6
Ezrin OS=Sus scrofa OX=9823 GN=EZR PE=1 SV=3	tr|F1SB42|F1SB42_PIG	P15311	65 kDa	0.49	1.2
Hydroxysteroid 17-beta dehydrogenase 4 OS=Sus scrofa OX=9823 GN=HSD17B4 PE=1 SV=2	tr|I3LEF8|I3LEF8_PIG	P51659	80 kDa	0.49	0.8
Aldo-keto reductase family 1 member B1 OS=Sus scrofa OX=9823 GN=AKR1B1 PE=1 SV=2	sp|P80276|ALDR_PIG	P15121	36 kDa	0.5	1.1
ATP synthase subunit f, mitochondrial OS=Sus scrofa OX=9823 GN=ATP5MF PE=1 SV=4	sp|Q95339|ATPK_PIG	P56134	10 kDa	0.5	0.9
NADH:ubiquinone oxidoreductase core subunit S8 OS=Sus scrofa OX=9823 GN=NDUFS8 PE=1 SV=2	tr|A0A286ZUN9|A0A286ZUN9_PIG	O00217	22 kDa	0.5	0.8
Dolichyl-diphosphooligosaccharide--protein glycosyltransferase 48 kDa subunit OS=Sus scrofa OX=9823 GN=DDOST PE=1 SV=1	tr|A0A287AGM8|A0A287AGM8_PIG	P39656	49 kDa	0.5	0.5
D-aspartate oxidase OS=Sus scrofa OX=9823 GN=DDO PE=4 SV=2	tr|A0A287AJN4|A0A287AJN4_PIG (+1)	Q99489	40 kDa	0.5	0.5
Succinate-semialdehyde dehydrogenase OS=Sus scrofa OX=9823 GN=ALDH5A1 PE=3 SV=2	tr|A0A287AR05|A0A287AR05_PIG	P51649	57 kDa	0.5	1.2
NAD(P)(+)--arginine ADP-ribosyltransferase OS=Sus scrofa OX=9823 GN=ART3 PE=1 SV=1	tr|A0A287AX04|A0A287AX04_PIG	Q13508	40 kDa	0.5	1.2
3-hydroxyisobutyryl-CoA hydrolase, mitochondrial OS=Sus scrofa OX=9823 GN=HIBCH PE=1 SV=2	tr|A0A287B9G2|A0A287B9G2_PIG (+2)	Q6NVY1	40 kDa	0.5	1.2
NADH dehydrogenase ubiquinone flavoprotein 2, mitochondrial OS=Sus scrofa OX=9823 GN=NDUFV2 PE=1 SV=1	tr|A0A287BG40|A0A287BG40_PIG	P19404	27 kDa	0.5	1.2
1,4-alpha-glucan branching enzyme 1 OS=Sus scrofa OX=9823 GN=GBE1 PE=1 SV=1	tr|A0A480PP98|A0A480PP98_PIG	Q04446	81 kDa	0.5	1.3
Collagen IV NC1 domain-containing protein OS=Sus scrofa OX=9823 PE=1 SV=1	tr|A0A5G2QEJ2|A0A5G2QEJ2_PIG	P39059	47 kDa	0.5	0.6
Branched chain keto acid dehydrogenase E1 subunit beta OS=Sus scrofa OX=9823 GN=BCKDHB PE=1 SV=1	tr|A0A5G2QWA0|A0A5G2QWA0_PIG	P21953	43 kDa	0.5	0.7
Metallo-beta-lactamase domain containing 1 OS=Sus scrofa OX=9823 GN=MBLAC1 PE=4 SV=1	tr|A0A5G2R1J3|A0A5G2R1J3_PIG	A4D2B0	29 kDa	0.5	0.5
Malic enzyme OS=Sus scrofa OX=9823 GN=ME3 PE=1 SV=1	tr|A0A5G2RAT9|A0A5G2RAT9_PIG (+1)	Q16798	67 kDa	0.5	1.2
Heterogeneous nuclear ribonucleoprotein F OS=Sus scrofa OX=9823 GN=HNRNPF PE=1 SV=1	tr|F1RG16|F1RG16_PIG	P52597	46 kDa	0.5	1.2
Peptidase D OS=Sus scrofa OX=9823 GN=PEPD PE=1 SV=3	tr|F1RNW4|F1RNW4_PIG	P12955	55 kDa	0.5	1.2
Coronin OS=Sus scrofa OX=9823 GN=CORO1B PE=1 SV=3	tr|F1RUX1|F1RUX1_PIG	Q9BR76	54 kDa	0.5	1.3
Transaldolase OS=Sus scrofa OX=9823 GN=TALDO1 PE=1 SV=3	tr|F1RYY6|F1RYY6_PIG	P37837	37 kDa	0.5	1.2
NHL repeat containing 2 OS=Sus scrofa OX=9823 GN=NHLRC2 PE=1 SV=2	tr|F1S5H7|F1S5H7_PIG	Q8NBF2	79 kDa	0.5	1.3
Calcineurin like EF-hand protein 1 OS=Sus scrofa OX=9823 GN=CHP1 PE=4 SV=3	tr|F1SSV2|F1SSV2_PIG	Q99653	22 kDa	0.5	0.6
G protein subunit beta 2 OS=Sus scrofa OX=9823 GN=GNB2 PE=1 SV=3	tr|F2Z4Z8|F2Z4Z8_PIG	P62879	37 kDa	0.5	0.6
CDC37 cell division cycle 37 protein OS=Sus scrofa OX=9823 GN=CDC37 PE=1 SV=1	tr|Q684M6|Q684M6_PIG	Q16543	44 kDa	0.5	1.2
Ribose-5-phosphate isomerase OS=Sus scrofa OX=9823 GN=RPIA PE=2 SV=1	sp|A2TLM1|RPIA_PIG	P49247	33 kDa	0.51	0.6
Hypoxanthine-guanine phosphoribosyltransferase OS=Sus scrofa OX=9823 GN=HPRT1 PE=2 SV=3	sp|Q45FY6|HPRT_PIG	P00492	25 kDa	0.51	0.7
Calumenin OS=Sus scrofa OX=9823 GN=CALU PE=4 SV=2	tr|A0A286ZM82|A0A286ZM82_PIG	O43852	44 kDa	0.51	0.6
Carnitine O-acetyltransferase OS=Sus scrofa OX=9823 GN=CRAT PE=1 SV=1	tr|A0A286ZRC3|A0A286ZRC3_PIG (+1)	P43155	71 kDa	0.51	1.2
Cytochrome c oxidase subunit OS=Sus scrofa OX=9823 GN=COX6B PE=1 SV=1	tr|A0A287A808|A0A287A808_PIG	P14854	10 kDa	0.51	0.9
Uncharacterized protein OS=Sus scrofa OX=9823 GN=PPP3R1 PE=1 SV=2	tr|A0A287ACI6|A0A287ACI6_PIG		21 kDa	0.51	0.3
Myotilin OS=Sus scrofa OX=9823 GN=MYOT PE=4 SV=2	tr|A0A287AJY7|A0A287AJY7_PIG	Q9UBF9	71 kDa	0.51	0.7
Heat shock protein family B (small) member 6 OS=Sus scrofa OX=9823 GN=HSPB6 PE=1 SV=1	tr|A0A287AQR8|A0A287AQR8_PIG	O14558	17 kDa	0.51	1.2
Uncharacterized protein OS=Sus scrofa OX=9823 GN=SNTA1 PE=1 SV=1	tr|A0A287B2G7|A0A287B2G7_PIG		118 kDa	0.51	0.8
Neural cell adhesion molecule 1 OS=Sus scrofa OX=9823 GN=NCAM1 PE=1 SV=2	tr|A0A287BN02|A0A287BN02_PIG	P13591	119 kDa	0.51	0.7
Adhesion G protein-coupled receptor E5 OS=Sus scrofa OX=9823 GN=ADGRE5 PE=1 SV=1	tr|A0A5G2QP76|A0A5G2QP76_PIG	P48960	80 kDa	0.51	0.3
Prostaglandin I2 synthase OS=Sus scrofa OX=9823 GN=PTGIS PE=1 SV=1	tr|A0A5G2QT35|A0A5G2QT35_PIG (+2)	Q16647	57 kDa	0.51	0.5
Hyaluronan and proteoglycan link protein 3 OS=Sus scrofa OX=9823 GN=HAPLN3 PE=1 SV=1	tr|A0A5G2R7K8|A0A5G2R7K8_PIG	Q96S86	46 kDa	0.51	0.3
Prefoldin subunit 4 OS=Sus scrofa OX=9823 GN=PFDN4 PE=1 SV=1	tr|A5GHK3|A5GHK3_PIG	Q9NQP4	15 kDa	0.51	0.3
Elongation factor 1-gamma OS=Sus scrofa OX=9823 GN=EEF1G PE=4 SV=3	tr|F1RPW9|F1RPW9_PIG	P26641	50 kDa	0.51	1.2
Uncharacterized protein OS=Sus scrofa OX=9823 GN=THBS1 PE=1 SV=2	tr|F1SS26|F1SS26_PIG		130 kDa	0.51	1.4
Cytosol aminopeptidase OS=Sus scrofa OX=9823 GN=LAP3 PE=1 SV=2	tr|I3LD43|I3LD43_PIG	P28838	56 kDa	0.51	0.7
von Willebrand factor A domain containing 8 OS=Sus scrofa OX=9823 GN=VWA8 PE=1 SV=2	tr|I3LJL2|I3LJL2_PIG	A3KMH1	205 kDa	0.51	0.7
Selenide, water dikinase 1 isoform 1 OS=Sus scrofa OX=9823 GN=SEPHS1_tv1 PE=1 SV=1	tr|K9IVF4|K9IVF4_PIG	P49903	43 kDa	0.51	1.7
Hydroxyacyl-coenzyme A dehydrogenase, mitochondrial OS=Sus scrofa OX=9823 GN=HADH PE=1 SV=2	sp|P00348|HCDH_PIG	Q16836	34 kDa	0.52	1.1
NADH-cytochrome b5 reductase 3 (Fragment) OS=Sus scrofa OX=9823 GN=CYB5R3 PE=1 SV=1	sp|P83686|NB5R3_PIG	P00387	31 kDa	0.52	0.8
NADPH--cytochrome P450 reductase OS=Sus scrofa OX=9823 GN=POR PE=1 SV=1	tr|A0A286ZXA3|A0A286ZXA3_PIG	P16435	88 kDa	0.52	0.5
Lysine--tRNA ligase OS=Sus scrofa OX=9823 GN=KARS1 PE=1 SV=1	tr|A0A287A3Q5|A0A287A3Q5_PIG	Q15046	90 kDa	0.52	1.5
Purine nucleoside phosphorylase OS=Sus scrofa OX=9823 GN=PNP PE=1 SV=1	tr|A0A287AM78|A0A287AM78_PIG	P00491	32 kDa	0.52	1.7
Septin 8 OS=Sus scrofa OX=9823 GN=SEPTIN8 PE=1 SV=2	tr|A0A287AWW1|A0A287AWW1_PIG	Q92599	60 kDa	0.52	2.1
Synapse-associated protein 1 OS=Sus scrofa OX=9823 GN=SYAP1 PE=1 SV=1	tr|A0A287AX76|A0A287AX76_PIG	Q96A49	41 kDa	0.52	0.3
Target of myb1 membrane trafficking protein OS=Sus scrofa OX=9823 GN=TOM1 PE=1 SV=1	tr|A0A287AZ22|A0A287AZ22_PIG	O60784	56 kDa	0.52	0.7
Proteasome subunit beta OS=Sus scrofa OX=9823 GN=PSMB4 PE=1 SV=1	tr|A0A287B088|A0A287B088_PIG	P28070	29 kDa	0.52	0.4
26S proteasome non-ATPase regulatory subunit 8 OS=Sus scrofa OX=9823 GN=PSMD8 PE=1 SV=1	tr|A0A287B5Q7|A0A287B5Q7_PIG	P48556	40 kDa	0.52	1.6
Trifunctional enzyme subunit beta, mitochondrial isoform X1 OS=Sus scrofa OX=9823 GN=HADHB PE=1 SV=1	tr|A0A287BPJ7|A0A287BPJ7_PIG (+1)	P55084	51 kDa	0.52	1.2
Eukaryotic translation initiation factor 4 gamma 1 OS=Sus scrofa OX=9823 GN=EIF4G1 PE=1 SV=2	tr|A0A287BR08|A0A287BR08_PIG	Q04637	173 kDa	0.52	0.7
Dihydrolipoamide acetyltransferase component of pyruvate dehydrogenase complex OS=Sus scrofa OX=9823 GN=DBT PE=1 SV=1	tr|A0A5G2QFH7|A0A5G2QFH7_PIG	P11182	79 kDa	0.52	1.3
Hydroxysteroid dehydrogenase like 2 OS=Sus scrofa OX=9823 GN=HSDL2 PE=1 SV=1	tr|A0A5G2R0Z8|A0A5G2R0Z8_PIG	Q6YN16	45 kDa	0.52	1.2
Hydroxymethylbilane synthase OS=Sus scrofa OX=9823 GN=HMBS PE=1 SV=1	tr|A0SNU8|A0SNU8_PIG	P08397	39 kDa	0.52	0.7
F-actin-capping protein subunit beta OS=Sus scrofa OX=9823 GN=CAPZB PE=1 SV=1	tr|A9XFX6|A9XFX6_PIG	P47756	31 kDa	0.52	1.2
Ferritin OS=Sus scrofa OX=9823 GN=FTL PE=1 SV=3	tr|F1RIP3|F1RIP3_PIG	P02792	23 kDa	0.52	0.6
Histone H3 OS=Sus scrofa OX=9823 GN=HIST1H3E PE=2 SV=2	tr|F1RVA0|F1RVA0_PIG	P68431	15 kDa	0.52	0.8
NSFL1 cofactor OS=Sus scrofa OX=9823 GN=NSFL1C PE=1 SV=3	tr|F1S880|F1S880_PIG	Q9UNZ2	41 kDa	0.52	1.1
Activator of HSP90 ATPase activity 1 OS=Sus scrofa OX=9823 GN=AHSA1 PE=1 SV=1	tr|F1SE06|F1SE06_PIG	O95433	38 kDa	0.52	1.9
Glycyl-tRNA synthetase OS=Sus scrofa OX=9823 GN=GARS1 PE=1 SV=2	tr|F1SII4|F1SII4_PIG	P41250	84 kDa	0.52	0.7
40S ribosomal protein S8 OS=Sus scrofa OX=9823 GN=RPS8 PE=1 SV=3	tr|F2Z5F5|F2Z5F5_PIG	P62241	24 kDa	0.52	0.6
Succinate dehydrogenase [ubiquinone] iron-sulfur subunit, mitochondrial OS=Sus scrofa OX=9823 GN=SDHB PE=1 SV=1	tr|I3LDC1|I3LDC1_PIG	P21912	32 kDa	0.52	0.8
Dipeptidyl peptidase 7 OS=Sus scrofa OX=9823 GN=DPP7 PE=1 SV=2	tr|A0A286ZJD8|A0A286ZJD8_PIG	Q9UHL4	63 kDa	0.53	1.8
Microtubule associated protein 1B OS=Sus scrofa OX=9823 GN=MAP1B PE=1 SV=2	tr|A0A286ZJQ4|A0A286ZJQ4_PIG (+1)	P46821	270 kDa	0.53	0.5
Glutamyl-prolyl-tRNA synthetase OS=Sus scrofa OX=9823 GN=EPRS1 PE=1 SV=1	tr|A0A286ZQW0|A0A286ZQW0_PIG (+1)	P07814	171 kDa	0.53	0.6
Ribokinase OS=Sus scrofa OX=9823 GN=RBKS PE=1 SV=1	tr|A0A287A7K4|A0A287A7K4_PIG	Q9H477	34 kDa	0.53	0.6
Proteasome 26S subunit, non-ATPase 7 OS=Sus scrofa OX=9823 GN=PSMD7 PE=1 SV=1	tr|A0A287AEH0|A0A287AEH0_PIG	P51665	37 kDa	0.53	0.5
Nidogen 2 OS=Sus scrofa OX=9823 GN=NID2 PE=1 SV=1	tr|A0A287AKJ2|A0A287AKJ2_PIG	Q14112	148 kDa	0.53	0.9
Inter-alpha-trypsin inhibitor heavy chain H1 OS=Sus scrofa OX=9823 GN=ITIH1 PE=1 SV=2	tr|A0A287B3S3|A0A287B3S3_PIG	P19827	103 kDa	0.53	1.2
Neuroplastin OS=Sus scrofa OX=9823 GN=NPTN PE=1 SV=2	tr|A0A287BAZ0|A0A287BAZ0_PIG	Q9Y639	41 kDa	0.53	0.5
Polyadenylate-binding protein OS=Sus scrofa OX=9823 GN=PABPC4 PE=1 SV=2	tr|A0A287BQ02|A0A287BQ02_PIG (+1)	Q13310	72 kDa	0.53	0.6
3-hydroxyisobutyrate dehydrogenase OS=Sus scrofa OX=9823 GN=HIBADH PE=1 SV=1	tr|A0A5G2QKU9|A0A5G2QKU9_PIG	P31937	33 kDa	0.53	1.1
Calpain-2 catalytic subunit OS=Sus scrofa OX=9823 GN=CAPN2 PE=1 SV=1	tr|A0A5G2QPE1|A0A5G2QPE1_PIG	P17655	80 kDa	0.53	1.2
Carboxypeptidase OS=Sus scrofa OX=9823 GN=CTSA PE=1 SV=4	tr|F1SC70|F1SC70_PIG	P10619	54 kDa	0.53	2.1
Uncharacterized protein OS=Sus scrofa OX=9823 GN=JPH2 PE=1 SV=2	tr|F1SDT0|F1SDT0_PIG		44 kDa	0.53	1.3
Uncharacterized protein OS=Sus scrofa OX=9823 GN=MYL3 PE=1 SV=3	tr|F1SNW4|F1SNW4_PIG		22 kDa	0.53	0.9
Tubulin alpha chain OS=Sus scrofa OX=9823 GN=TUBA1B PE=3 SV=3	tr|F2Z5T5|F2Z5T5_PIG	P68363	50 kDa	0.53	1.1
UTP--glucose-1-phosphate uridylyltransferase OS=Sus scrofa OX=9823 GN=UGP2 PE=2 SV=3	sp|P79303|UGPA_PIG	Q16851	57 kDa	0.54	0.8
F-actin-capping protein subunit alpha-2 OS=Sus scrofa OX=9823 GN=CAPZA2 PE=2 SV=3	sp|Q29221|CAZA2_PIG	P47755	33 kDa	0.54	0.9
Serine/arginine-rich splicing factor 1 OS=Sus scrofa OX=9823 GN=SRSF1 PE=2 SV=3	sp|Q3YLA6|SRSF1_PIG (+2)	Q07955	28 kDa	0.54	0.6
Heterogeneous nuclear ribonucleoprotein A1 OS=Sus scrofa OX=9823 GN=HNRNPA1 PE=1 SV=1	tr|A0A286ZPE3|A0A286ZPE3_PIG	P09651	39 kDa	0.54	0.8
G3BP stress granule assembly factor 1 OS=Sus scrofa OX=9823 GN=G3BP1 PE=4 SV=2	tr|A0A286ZTN5|A0A286ZTN5_PIG	Q13283	55 kDa	0.54	0.8
Uncharacterized protein OS=Sus scrofa OX=9823 PE=4 SV=2	tr|A0A287ALC1|A0A287ALC1_PIG		53 kDa	0.54	0.8
Radixin OS=Sus scrofa OX=9823 GN=RDX PE=1 SV=2	tr|A0A287AQS9|A0A287AQS9_PIG	P35241	69 kDa	0.54	1.2
HLA class II histocompatibility antigen, DRB1-4 beta chain isoform X2 OS=Sus scrofa OX=9823 GN=LOC100153139 PE=1 SV=1	tr|A0A287ARX3|A0A287ARX3_PIG (+1)		30 kDa	0.54	2
Eukaryotic translation initiation factor 4B OS=Sus scrofa OX=9823 GN=EIF4B PE=4 SV=2	tr|A0A287AT83|A0A287AT83_PIG	P23588	70 kDa	0.54	0.4
Desmoglein 2 OS=Sus scrofa OX=9823 GN=DSG2 PE=1 SV=2	tr|A0A287ATF2|A0A287ATF2_PIG	Q14126	124 kDa	0.54	1.2
Uncharacterized protein OS=Sus scrofa OX=9823 PE=1 SV=2	tr|A0A287B626|A0A287B626_PIG		44 kDa	0.54	0.7
Nudix hydrolase 19 OS=Sus scrofa OX=9823 GN=NUDT19 PE=1 SV=1	tr|A0A287B8K2|A0A287B8K2_PIG (+1)	A8MXV4	36 kDa	0.54	0.8
VAMP associated protein A OS=Sus scrofa OX=9823 GN=VAPA PE=1 SV=1	tr|A0A287BBB5|A0A287BBB5_PIG	Q9P0L0	32 kDa	0.54	0.8
Tyrosine-protein phosphatase non-receptor type OS=Sus scrofa OX=9823 GN=PTPN11 PE=1 SV=1	tr|A0A480ERB4|A0A480ERB4_PIG (+1)	Q06124	68 kDa	0.54	1.8
Platelet-activating factor acetylhydrolase IB subunit alpha OS=Sus scrofa OX=9823 GN=PAFAH1B1 PE=1 SV=1	tr|A0A480UJL5|A0A480UJL5_PIG	P43034	47 kDa	0.54	1.4
Transketolase OS=Sus scrofa OX=9823 GN=TKT PE=1 SV=1	tr|A0A5G2QNL3|A0A5G2QNL3_PIG (+1)	P29401	65 kDa	0.54	1.1
Methylthioribulose-1-phosphate dehydratase OS=Sus scrofa OX=9823 GN=APIP PE=1 SV=1	tr|A0A5G2R267|A0A5G2R267_PIG	Q96GX9	27 kDa	0.54	0.6
Serine hydroxymethyltransferase OS=Sus scrofa OX=9823 GN=SHMT2 PE=1 SV=1	tr|A0A5G2R6D0|A0A5G2R6D0_PIG	P34897	53 kDa	0.54	2
Protein phosphatase 1 regulatory inhibitor subunit 14C OS=Sus scrofa OX=9823 GN=PPP1R14C PE=1 SV=1	tr|A0A5G2RL03|A0A5G2RL03_PIG	Q8TAE6	18 kDa	0.54	2.1
G-rich RNA sequence binding factor 1 OS=Sus scrofa OX=9823 GN=GRSF1 PE=1 SV=3	tr|F1RUP2|F1RUP2_PIG	Q12849	67 kDa	0.54	0.7
Voltage-dependent anion-selective channel protein 2 OS=Sus scrofa OX=9823 GN=VDAC2 PE=4 SV=3	tr|F1S2F6|F1S2F6_PIG	P45880	32 kDa	0.54	0.8
Leucine zipper and EF-hand containing transmembrane protein 1 OS=Sus scrofa OX=9823 GN=LETM1 PE=4 SV=4	tr|F1S9F3|F1S9F3_PIG	O95202	88 kDa	0.54	0.7
SERPIN domain-containing protein OS=Sus scrofa OX=9823 GN=SERPINA3-2 PE=1 SV=3	tr|F1SCD1|F1SCD1_PIG	P01011	47 kDa	0.54	0.8
Dynactin subunit 2 OS=Sus scrofa OX=9823 GN=DCTN2 PE=1 SV=3	tr|F1SL58|F1SL58_PIG	Q13561	45 kDa	0.54	0.8
Catenin beta 1 OS=Sus scrofa OX=9823 GN=CTNNB1 PE=1 SV=1	tr|F6QAP1|F6QAP1_PIG	P35222	86 kDa	0.54	0.8
EH domain containing 4 OS=Sus scrofa OX=9823 GN=EHD4 PE=1 SV=2	tr|I3LDA5|I3LDA5_PIG	Q9H223	61 kDa	0.54	0.9
Apolipoprotein A-I OS=Sus scrofa OX=9823 GN=APOA1 PE=3 SV=2	tr|K7GM40|K7GM40_PIG	P02647	30 kDa	0.54	0.7
Cytochrome c oxidase subunit 1 OS=Sus scrofa OX=9823 GN=MT-CO1 PE=3 SV=2	sp|O79876|COX1_PIG	P00395	57 kDa	0.55	1.5
Glycine amidinotransferase, mitochondrial OS=Sus scrofa OX=9823 GN=GATM PE=1 SV=2	sp|P50441|GATM_PIG	P50440	48 kDa	0.55	2.9
40S ribosomal protein S18 OS=Sus scrofa OX=9823 GN=RPS18 PE=1 SV=3	sp|P62272|RS18_PIG	P62269	18 kDa	0.55	0.8
Secretogranin-1 OS=Sus scrofa OX=9823 GN=CHGB PE=4 SV=1	tr|A0A286ZQZ7|A0A286ZQZ7_PIG	P05060	74 kDa	0.55	0.3
Jupiter microtubule associated homolog 1 OS=Sus scrofa OX=9823 GN=JPT1 PE=1 SV=2	tr|A0A287ANU2|A0A287ANU2_PIG (+2)	Q9UK76	18 kDa	0.55	0.5
Ig-like domain-containing protein OS=Sus scrofa OX=9823 PE=4 SV=2	tr|A0A287BAB3|A0A287BAB3_PIG	Not present in human	18 kDa	0.55	0.8
Joining chain of multimeric IgA and IgM OS=Sus scrofa OX=9823 GN=JCHAIN PE=4 SV=2	tr|A0A287BJL0|A0A287BJL0_PIG	P01591	19 kDa	0.55	0.4
cAMP-dependent protein kinase catalytic subunit beta OS=Sus scrofa OX=9823 GN=PRKACB PE=3 SV=2	tr|A0A287BQL5|A0A287BQL5_PIG	P22694	46 kDa	0.55	0.8
Kynurenine aminotransferase 3 OS=Sus scrofa OX=9823 GN=KYAT3 PE=1 SV=1	tr|A0A287BSQ5|A0A287BSQ5_PIG	Q6YP21	47 kDa	0.55	0.8
Apolipoprotein C-III OS=Sus scrofa OX=9823 GN=APOC3 PE=1 SV=1	tr|A0A5G2QLU1|A0A5G2QLU1_PIG	P02656	21 kDa	0.55	1.3
Uncharacterized protein OS=Sus scrofa OX=9823 GN=OBSCN PE=4 SV=1	tr|A0A5G2QZ79|A0A5G2QZ79_PIG		780 kDa	0.55	0.7
Collagen type IV alpha 2 chain OS=Sus scrofa OX=9823 GN=COL4A2 PE=1 SV=1	tr|A0A5G2REY7|A0A5G2REY7_PIG	P08572	164 kDa	0.55	0.4
Plastin 3 OS=Sus scrofa OX=9823 GN=PLS3 PE=1 SV=1	tr|A0A5K1TXL1|A0A5K1TXL1_PIG	P13797	66 kDa	0.55	0.9
ATPase family AAA domain containing 3A OS=Sus scrofa OX=9823 GN=ATAD3A PE=1 SV=3	tr|F1RJE4|F1RJE4_PIG	Q9NVI7	58 kDa	0.55	0.6
IQ motif containing GTPase activating protein 1 OS=Sus scrofa OX=9823 GN=IQGAP1 PE=1 SV=4	tr|F1RMJ4|F1RMJ4_PIG	P46940	195 kDa	0.55	1.3
TFCD_C domain-containing protein OS=Sus scrofa OX=9823 GN=TBCD PE=1 SV=3	tr|F1RZZ1|F1RZZ1_PIG	Q9BTW9	132 kDa	0.55	0.3
Pribosyltran domain-containing protein OS=Sus scrofa OX=9823 GN=APRT PE=1 SV=2	tr|F1S6K5|F1S6K5_PIG	P07741	26 kDa	0.55	1.2
Protein disulfide-isomerase OS=Sus scrofa OX=9823 GN=P4HB PE=2 SV=1	tr|G9F6X8|G9F6X8_PIG	P07237	56 kDa	0.55	1
Lactoylglutathione lyase OS=Sus scrofa OX=9823 GN=GLO1 PE=1 SV=1	tr|I3LDM7|I3LDM7_PIG	Q04760	21 kDa	0.55	0.7
Aldehyde dehydrogenase 1 family member A1 OS=Sus scrofa OX=9823 GN=ALDH1A1 PE=1 SV=2	tr|I3LRS5|I3LRS5_PIG	P14550	55 kDa	0.55	0.8
RNA binding motif protein X-linked OS=Sus scrofa OX=9823 GN=RBMX PE=1 SV=2	tr|K7GNV0|K7GNV0_PIG	P38159	44 kDa	0.55	0.5
Electron transfer flavoprotein subunit beta OS=Sus scrofa OX=9823 GN=ETFB PE=1 SV=3	sp|Q6UAQ8|ETFB_PIG	P38117	28 kDa	0.56	1.1
N-acetylglucosamine kinase OS=Sus scrofa OX=9823 GN=NAGK PE=1 SV=1	tr|A0A286ZMD1|A0A286ZMD1_PIG	Q9UJ70	37 kDa	0.56	0.5
Adenylate kinase isoenzyme 1 OS=Sus scrofa OX=9823 GN=AK1 PE=3 SV=2	tr|A0A286ZQ79|A0A286ZQ79_PIG	P00568	29 kDa	0.56	0.9
Actin-related protein 2 OS=Sus scrofa OX=9823 GN=ACTR2 PE=1 SV=1	tr|A0A286ZXX3|A0A286ZXX3_PIG	O15145	46 kDa	0.56	1.3
Kinesin-like protein OS=Sus scrofa OX=9823 GN=KIF5B PE=1 SV=1	tr|A0A287A1V7|A0A287A1V7_PIG	P33176	109 kDa	0.56	1.2
Tubulointerstitial nephritis antigen like 1 OS=Sus scrofa OX=9823 GN=TINAGL1 PE=1 SV=1	tr|A0A287ANT6|A0A287ANT6_PIG	Q9GZM7	52 kDa	0.56	0.8
Nebulin related anchoring protein OS=Sus scrofa OX=9823 GN=NRAP PE=4 SV=1	tr|A0A287AP18|A0A287AP18_PIG	Q86VF7	197 kDa	0.56	0.8
HMA domain-containing protein OS=Sus scrofa OX=9823 PE=1 SV=1	tr|A0A287B262|A0A287B262_PIG	Not present in human	6 kDa	0.56	1.2
NADH:ubiquinone oxidoreductase subunit A5 OS=Sus scrofa OX=9823 GN=NDUFA5 PE=1 SV=2	tr|A0A287BAW0|A0A287BAW0_PIG (+1)	Q16718	13 kDa	0.56	0.8
Sorbin and SH3 domain-containing protein 2 OS=Sus scrofa OX=9823 GN=SORBS2 PE=1 SV=1	tr|A0A287BKF4|A0A287BKF4_PIG	O94875	159 kDa	0.56	0.9
PDZ and LIM domain protein 3 OS=Sus scrofa OX=9823 GN=PDLIM3 PE=1 SV=1	tr|A0A480QG05|A0A480QG05_PIG	Q53GG5	35 kDa	0.56	1.3
Heparin binding growth factor OS=Sus scrofa OX=9823 GN=HDGF PE=1 SV=1	tr|A0A5G2QHZ3|A0A5G2QHZ3_PIG (+1)	P51858	27 kDa	0.56	0.8
NFU1 iron-sulfur cluster scaffold OS=Sus scrofa OX=9823 GN=NFU1 PE=1 SV=1	tr|A0A5G2QZ54|A0A5G2QZ54_PIG	Q9UMS0	28 kDa	0.56	0.8
EKC/KEOPS complex subunit GON7 OS=Sus scrofa OX=9823 PE=4 SV=1	tr|A0A5S6FUH2|A0A5S6FUH2_PIG	Q9BXV9	11 kDa	0.56	0.5
Glutathione S-transferase kappa OS=Sus scrofa OX=9823 GN=GSTK1 PE=1 SV=1	tr|F1SRV4|F1SRV4_PIG	Q9Y2Q3	25 kDa	0.56	1.2
Transcription factor BTF3 OS=Sus scrofa OX=9823 GN=BTF3 PE=1 SV=3	tr|F2Z5H8|F2Z5H8_PIG	P20290	21 kDa	0.56	0.8
Ubiquinol-cytochrome c reductase complex OS=Sus scrofa OX=9823 GN=UQCR10 PE=1 SV=1	tr|Q2EN79|Q2EN79_PIG	Q9UDW1	7 kDa	0.56	1.3
ERO1-like protein alpha OS=Sus scrofa OX=9823 GN=ERO1A PE=2 SV=1	sp|B6CVD7|ERO1A_PIG	Q96HE7	54 kDa	0.57	1.6
Malate dehydrogenase, mitochondrial OS=Sus scrofa OX=9823 GN=MDH2 PE=1 SV=2	sp|P00346|MDHM_PIG	P40926	36 kDa	0.57	0.9
60S ribosomal protein L6 OS=Sus scrofa OX=9823 GN=RPL6 PE=1 SV=3	sp|Q2YGT9|RL6_PIG	Q02878	32 kDa	0.57	1.3
Prelamin-A/C OS=Sus scrofa OX=9823 GN=LMNA PE=3 SV=1	sp|Q3ZD69|LMNA_PIG	P02545	74 kDa	0.57	1.2
Decorin OS=Sus scrofa OX=9823 GN=DCN PE=2 SV=1	sp|Q9XSD9|PGS2_PIG	P07585	40 kDa	0.57	1.1
DAZ associated protein 1 OS=Sus scrofa OX=9823 GN=DAZAP1 PE=4 SV=2	tr|A0A286ZNG8|A0A286ZNG8_PIG (+3)	Q96EP5	24 kDa	0.57	0.8
ATP synthase subunit s, mitochondrial isoform X1 OS=Sus scrofa OX=9823 GN=DMAC2L PE=1 SV=1	tr|A0A286ZRY7|A0A286ZRY7_PIG	Q99766	28 kDa	0.57	1.9
Tripartite motif containing 28 OS=Sus scrofa OX=9823 GN=TRIM28 PE=4 SV=1	tr|A0A286ZVA8|A0A286ZVA8_PIG	Q13263	92 kDa	0.57	1.5
A-kinase anchoring protein 12 OS=Sus scrofa OX=9823 GN=AKAP12 PE=1 SV=2	tr|A0A287A3A3|A0A287A3A3_PIG	Q02952	180 kDa	0.57	0.7
Ig-like domain-containing protein OS=Sus scrofa OX=9823 PE=1 SV=1	tr|A0A287A4Y3|A0A287A4Y3_PIG	Not present in human	25 kDa	0.57	0.8
LanC like 2 OS=Sus scrofa OX=9823 GN=LANCL2 PE=1 SV=1	tr|A0A287A9G0|A0A287A9G0_PIG	Q9NS86	51 kDa	0.57	1.4
NEDD8 ubiquitin like modifier OS=Sus scrofa OX=9823 GN=NEDD8 PE=1 SV=1	tr|A0A287AE63|A0A287AE63_PIG	Q15843	8 kDa	0.57	1.3
SERPIN domain-containing protein OS=Sus scrofa OX=9823 GN=LOC106504547 PE=1 SV=1	tr|A0A287AGW0|A0A287AGW0_PIG (+1)	Not present in human	44 kDa	0.57	1.4
Kelch like family member 41 OS=Sus scrofa OX=9823 GN=KLHL41 PE=1 SV=2	tr|A0A287AIE4|A0A287AIE4_PIG	O60662	68 kDa	0.57	1.3
EGF containing fibulin extracellular matrix protein 1 OS=Sus scrofa OX=9823 GN=EFEMP1 PE=1 SV=1	tr|A0A287AP71|A0A287AP71_PIG (+2)	Q12805	56 kDa	0.57	1.7
Dynamin-1-like protein isoform 6 OS=Sus scrofa OX=9823 GN=FGD4 PE=1 SV=2	tr|A0A287B0Q6|A0A287B0Q6_PIG	O00429	82 kDa	0.57	1.2
Serine/threonine-protein phosphatase CPPED1 OS=Sus scrofa OX=9823 GN=CPPED1 PE=1 SV=1	tr|A0A5G2QI52|A0A5G2QI52_PIG	Q9BRF8	35 kDa	0.57	0.4
Platelet activating factor acetylhydrolase 1b catalytic subunit 3 OS=Sus scrofa OX=9823 GN=PAFAH1B3 PE=1 SV=4	tr|F1RGI2|F1RGI2_PIG	Q15102	26 kDa	0.57	2.2
Potassium channel tetramerization domain containing 12 OS=Sus scrofa OX=9823 GN=KCTD12 PE=1 SV=2	tr|F1RHE6|F1RHE6_PIG	Q96CX2	35 kDa	0.57	1.2
Crystallin mu OS=Sus scrofa OX=9823 GN=CRYM PE=1 SV=2	tr|F1RPC8|F1RPC8_PIG	Q14894	34 kDa	0.57	0.4
UV excision repair protein RAD23 OS=Sus scrofa OX=9823 GN=RAD23B PE=3 SV=2	tr|F1SP32|F1SP32_PIG	P54727	35 kDa	0.57	0.9
Multifunctional fusion protein OS=Sus scrofa OX=9823 GN=ALDH4A1 PE=1 SV=3	tr|I3LNB4|I3LNB4_PIG	P30038	67 kDa	0.57	1.2
Cadherin-5 OS=Sus scrofa OX=9823 GN=CDH5 PE=2 SV=1	tr|Q8WNW5|Q8WNW5_PIG	P33151	88 kDa	0.57	0.4
Isocitrate dehydrogenase [NADP], mitochondrial (Fragment) OS=Sus scrofa OX=9823 GN=IDH2 PE=1 SV=1	sp|P33198|IDHP_PIG	P48735	48 kDa	0.58	1.1
Liver carboxylesterase OS=Sus scrofa OX=9823 PE=1 SV=1	sp|Q29550|EST1_PIG	P23141	62 kDa	0.58	0.8
L-2-hydroxyglutarate dehydrogenase OS=Sus scrofa OX=9823 GN=L2HGDH PE=1 SV=2	tr|A0A286ZQZ4|A0A286ZQZ4_PIG	Q9H9P8	51 kDa	0.58	0.7
Transmembrane emp24 domain-containing protein 10 OS=Sus scrofa OX=9823 GN=TMED10 PE=1 SV=1	tr|A0A286ZV95|A0A286ZV95_PIG	P49755	25 kDa	0.58	1.4
PDZ and LIM domain 5 OS=Sus scrofa OX=9823 GN=PDLIM5 PE=1 SV=1	tr|A0A287A3D2|A0A287A3D2_PIG	Q96HC4	67 kDa	0.58	0.9
Superoxide dismutase [Mn], mitochondrial OS=Sus scrofa OX=9823 GN=SOD2 PE=1 SV=2	tr|A0A287APZ8|A0A287APZ8_PIG	P04179	53 kDa	0.58	0.7
Serpin family F member 1 OS=Sus scrofa OX=9823 GN=SERPINF1 PE=1 SV=1	tr|A0A287AYJ8|A0A287AYJ8_PIG	P36955	48 kDa	0.58	1.2
Collagen type VI alpha 3 chain OS=Sus scrofa OX=9823 GN=COL6A3 PE=1 SV=1	tr|A0A287B163|A0A287B163_PIG	P12111	254 kDa	0.58	0.4
EH domain containing 3 OS=Sus scrofa OX=9823 GN=EHD3 PE=1 SV=1	tr|A0A287B1T2|A0A287B1T2_PIG	Q9NZN3	61 kDa	0.58	1.9
Methylcrotonoyl-CoA carboxylase 2 OS=Sus scrofa OX=9823 GN=MCCC2 PE=1 SV=2	tr|A0A287B773|A0A287B773_PIG	Q9HCC0	61 kDa	0.58	1.2
Microtubule-associated protein OS=Sus scrofa OX=9823 GN=MAP4 PE=1 SV=2	tr|A0A287BAB8|A0A287BAB8_PIG	P27816	237 kDa	0.58	0.7
SERPIN domain-containing protein OS=Sus scrofa OX=9823 GN=SERPINA3-2 PE=1 SV=1	tr|A0A287BH21|A0A287BH21_PIG	Not present in human	52 kDa	0.58	1.2
Enoyl-CoA hydratase domain containing 3 OS=Sus scrofa OX=9823 GN=ECHDC3 PE=1 SV=3	tr|F1RUP0|F1RUP0_PIG	Q96DC8	25 kDa	0.58	1.3
Ubiquinone biosynthesis monooxygenase COQ6, mitochondrial OS=Sus scrofa OX=9823 GN=COQ6 PE=1 SV=2	tr|F1S3H4|F1S3H4_PIG	Q9Y2Z9	51 kDa	0.58	0.8
Low molecular weight phosphotyrosine protein phosphatase OS=Sus scrofa OX=9823 GN=ACP1 PE=1 SV=4	tr|F1S9H9|F1S9H9_PIG	P24666	26 kDa	0.58	0.7
Kinectin 1 OS=Sus scrofa OX=9823 GN=KTN1 PE=1 SV=2	tr|F1SSN5|F1SSN5_PIG	Q86UP2	157 kDa	0.58	0.8
Succinate dehydrogenase [ubiquinone] flavoprotein subunit, mitochondrial OS=Sus scrofa OX=9823 GN=SDHA PE=1 SV=2	sp|Q0QF01|SDHA_PIG (+1)	P31040	73 kDa	0.59	0.9
GTP-binding protein SAR1a OS=Sus scrofa OX=9823 GN=SAR1A PE=2 SV=1	sp|Q52NJ3|SAR1A_PIG	Q9NR31	22 kDa	0.59	1.3
Heat shock 70 kDa protein 1B OS=Sus scrofa OX=9823 GN=HSPA1B PE=2 SV=1	sp|Q6S4N2|HS71B_PIG (+1)	P0DMV9	70 kDa	0.59	0.9
Osteoglycin OS=Sus scrofa OX=9823 GN=OGN PE=1 SV=1	tr|A0A0H5ANC0|A0A0H5ANC0_PIG	P20774	34 kDa	0.59	1.2
Yes associated protein 1 OS=Sus scrofa OX=9823 GN=YAP1 PE=1 SV=1	tr|A0A286ZNK4|A0A286ZNK4_PIG	P46937	47 kDa	0.59	0.5
40S ribosomal protein S7 OS=Sus scrofa OX=9823 GN=RPS7 PE=1 SV=1	tr|A0A287A9Y6|A0A287A9Y6_PIG	P62081	22 kDa	0.59	1.2
Peptide-methionine (R)-S-oxide reductase OS=Sus scrofa OX=9823 GN=MSRB3 PE=1 SV=1	tr|A0A287ACA3|A0A287ACA3_PIG	Q8IXL7	20 kDa	0.59	0.7
Basic leucine zipper and W2 domains 2 OS=Sus scrofa OX=9823 GN=BZW2 PE=4 SV=2	tr|A0A287AEC0|A0A287AEC0_PIG (+1)	Q9Y6E2	45 kDa	0.59	1.2
Proliferation and apoptosis adaptor protein 15 OS=Sus scrofa OX=9823 GN=PEA15 PE=1 SV=1	tr|A0A287AGA5|A0A287AGA5_PIG	Not present in human	15 kDa	0.59	0.7
N-acylsphingosine amidohydrolase 1 OS=Sus scrofa OX=9823 GN=ASAH1 PE=1 SV=2	tr|A0A287B5G7|A0A287B5G7_PIG (+1)	Q13510	53 kDa	0.59	0.4
Methylcrotonoyl-CoA carboxylase 1 OS=Sus scrofa OX=9823 GN=MCCC1 PE=1 SV=2	tr|A0A287BB12|A0A287BB12_PIG	Q96RQ3	103 kDa	0.59	1.3
Cell cycle associated protein 1 OS=Sus scrofa OX=9823 GN=CAPRIN1 PE=1 SV=1	tr|A0A287BHR0|A0A287BHR0_PIG	Q14444	78 kDa	0.59	0.4
Carbonyl reductase [NADPH] 2 OS=Sus scrofa OX=9823 GN=CBR2 PE=4 SV=1	tr|A0A287BT95|A0A287BT95_PIG	Q8NA72	26 kDa	0.59	0.7
Phospholysine phosphohistidine inorganic pyrophosphate phosphatase OS=Sus scrofa OX=9823 GN=LHPP PE=1 SV=1	tr|A0A480STU2|A0A480STU2_PIG	Q9H008	29 kDa	0.59	0.8
Protein phosphatase 1 regulatory subunit OS=Sus scrofa OX=9823 GN=PPP1R12A PE=1 SV=1	tr|A0A5G2Q9A7|A0A5G2Q9A7_PIG (+1)	O14974	109 kDa	0.59	1.4
Galactokinase 1 OS=Sus scrofa OX=9823 GN=GALK1 PE=1 SV=1	tr|A0A5G2QDU1|A0A5G2QDU1_PIG (+1)	P51570	45 kDa	0.59	0.7
SERPIN domain-containing protein OS=Sus scrofa OX=9823 GN=SERPINC1 PE=1 SV=1	tr|A0A5G2QUE0|A0A5G2QUE0_PIG	P01008	49 kDa	0.59	0.8
Bone marrow stromal cell antigen 1 OS=Sus scrofa OX=9823 GN=BST1 PE=1 SV=1	tr|A0A5G2QZ47|A0A5G2QZ47_PIG	Q10588	33 kDa	0.59	0.6
ECSIT signalling integrator OS=Sus scrofa OX=9823 GN=ECSIT PE=1 SV=1	tr|A0A5G2R1W8|A0A5G2R1W8_PIG (+2)	Q9BQ95	49 kDa	0.59	0.5
Mitochondrial pyruvate carrier OS=Sus scrofa OX=9823 GN=MPC1 PE=1 SV=1	tr|A0A5G2REF7|A0A5G2REF7_PIG	Q9Y5U8	12 kDa	0.59	1.2
Glucosamine-6-phosphate isomerase OS=Sus scrofa OX=9823 GN=GNPDA2 PE=1 SV=1	tr|F1S3T0|F1S3T0_PIG	Q8TDQ7	31 kDa	0.59	0.4
Uncharacterized protein OS=Sus scrofa OX=9823 GN=PSMF1 PE=4 SV=3	tr|F1S870|F1S870_PIG		38 kDa	0.59	0.4
Catenin delta 1 OS=Sus scrofa OX=9823 GN=CTNND1 PE=1 SV=4	tr|F1SJY6|F1SJY6_PIG	O60716	105 kDa	0.59	0.7
Ubiquinol-cytochrome c reductase core protein 1 OS=Sus scrofa OX=9823 GN=UQCRC1 PE=1 SV=3	tr|F1SKM0|F1SKM0_PIG	P31930	53 kDa	0.59	0.9
TP53 induced glycolysis regulatory phosphatase OS=Sus scrofa OX=9823 GN=TIGAR PE=4 SV=2	tr|F1SKZ0|F1SKZ0_PIG	Q9NQ88	29 kDa	0.59	0.5
Proteasome subunit alpha type OS=Sus scrofa OX=9823 GN=PSMA3 PE=1 SV=1	tr|F1SSL6|F1SSL6_PIG	P25788	28 kDa	0.59	0.6
Transmembrane protein 143 OS=Sus scrofa OX=9823 GN=TMEM143 PE=4 SV=2	tr|I3LUG5|I3LUG5_PIG	Q96AN5	57 kDa	0.59	1.9
Myosin regulatory light chain 2, atrial isoform OS=Sus scrofa OX=9823 GN=MYL7 PE=1 SV=3	sp|F1SSF9|MLRA_PIG	Q01449	19 kDa	0.6	0.7
L-lactate dehydrogenase A chain OS=Sus scrofa OX=9823 GN=LDHA PE=1 SV=3	sp|P00339|LDHA_PIG	P00338	37 kDa	0.6	0.9
Clusterin OS=Sus scrofa OX=9823 GN=CLU PE=1 SV=1	sp|Q29549|CLUS_PIG (+1)	P10909	52 kDa	0.6	0.6
Proteasome activator complex subunit 1 OS=Sus scrofa OX=9823 GN=PSME1 PE=2 SV=1	sp|Q64L94|PSME1_PIG	Q06323	29 kDa	0.6	0.8
Caspase 7 OS=Sus scrofa OX=9823 GN=CASP7 PE=3 SV=1	tr|A0A286ZKY7|A0A286ZKY7_PIG	P55210	37 kDa	0.6	0.6
Cathepsin D OS=Sus scrofa OX=9823 GN=CTSD PE=1 SV=2	tr|A0A286ZX26|A0A286ZX26_PIG	P07339	44 kDa	0.6	1.1
Cytochrome c oxidase assembly factor COX20 OS=Sus scrofa OX=9823 GN=COX20 PE=1 SV=1	tr|A0A287A189|A0A287A189_PIG	Q5RI15	13 kDa	0.6	0.7
ATPase ASNA1 OS=Sus scrofa OX=9823 GN=GET3 PE=1 SV=2	tr|A0A287AIE6|A0A287AIE6_PIG	O43681	39 kDa	0.6	1.2
Phosphoglycerate mutase OS=Sus scrofa OX=9823 GN=PGAM1 PE=1 SV=1	tr|A0A287AJQ2|A0A287AJQ2_PIG	P18669	29 kDa	0.6	1.1
Rho GTPase activating protein 1 OS=Sus scrofa OX=9823 GN=ARHGAP1 PE=1 SV=2	tr|A0A287AZG0|A0A287AZG0_PIG (+1)	Q07960	52 kDa	0.6	1.7
Dual specificity mitogen-activated protein kinase kinase 1 OS=Sus scrofa OX=9823 GN=MAP2K1 PE=1 SV=1	tr|A0A287BK75|A0A287BK75_PIG	Q02750	43 kDa	0.6	1.8
Adenylate cyclase type 6 OS=Sus scrofa OX=9823 GN=ADCY6 PE=3 SV=1	tr|A0A5G2Q9R4|A0A5G2Q9R4_PIG (+1)	O43306	124 kDa	0.6	0.7
Carbonyl reductase 4 OS=Sus scrofa OX=9823 GN=CBR4 PE=1 SV=1	tr|A0A5G2QL25|A0A5G2QL25_PIG	Q8N4T8	28 kDa	0.6	1.3
Elongin C OS=Sus scrofa OX=9823 GN=ELOC PE=1 SV=1	tr|A0A5G2QXY8|A0A5G2QXY8_PIG	Q15369	16 kDa	0.6	0.8
Protein-serine/threonine kinase OS=Sus scrofa OX=9823 GN=PDK1 PE=1 SV=1	tr|A0A5G2R0Y7|A0A5G2R0Y7_PIG (+1)	Q15118	47 kDa	0.6	1.5
Uncharacterized protein OS=Sus scrofa OX=9823 GN=GATD3A PE=1 SV=1	tr|A0A5G2R6F6|A0A5G2R6F6_PIG (+1)		29 kDa	0.6	0.9
Septin 7 OS=Sus scrofa OX=9823 GN=SEPTIN7 PE=1 SV=1	tr|A0A5G2RDA8|A0A5G2RDA8_PIG	Q16181	51 kDa	0.6	1.2
Uncharacterized protein OS=Sus scrofa OX=9823 GN=MATR3 PE=4 SV=3	tr|F1RGI7|F1RGI7_PIG		100 kDa	0.6	1.2
1,2-dihydroxy-3-keto-5-methylthiopentene dioxygenase OS=Sus scrofa OX=9823 GN=ADI1 PE=1 SV=1	tr|I3LEI8|I3LEI8_PIG	Q9BV57	22 kDa	0.6	0.8
Tropomyosin alpha-4 chain OS=Sus scrofa OX=9823 GN=TPM4 PE=2 SV=3	sp|P67937|TPM4_PIG	P67936	29 kDa	0.61	1.2
Cell division control protein 42 homolog OS=Sus scrofa OX=9823 GN=CDC42 PE=2 SV=2	sp|Q007T2|CDC42_PIG	P60953	21 kDa	0.61	0.8
Dihydrolipoyllysine-residue succinyltransferase component of 2-oxoglutarate dehydrogenase complex, mitochondrial OS=Sus scrofa OX=9823 GN=DLST PE=1 SV=1	sp|Q9N0F1|ODO2_PIG	P36957	49 kDa	0.61	0.8
Acyl-CoA thioesterase 4 OS=Sus scrofa OX=9823 GN=ACOT4 PE=1 SV=2	tr|A0A286ZVQ0|A0A286ZVQ0_PIG	Q8N9L9	46 kDa	0.61	1.1
Uncharacterized protein OS=Sus scrofa OX=9823 GN=AAMDC PE=1 SV=1	tr|A0A286ZXA4|A0A286ZXA4_PIG		13 kDa	0.61	0.8
Carbamoyl-phosphate synthase 1 OS=Sus scrofa OX=9823 GN=CPS1 PE=1 SV=1	tr|A0A287B4L9|A0A287B4L9_PIG	P31327	156 kDa	0.61	0.6
TOR signaling pathway regulator OS=Sus scrofa OX=9823 GN=TIPRL PE=1 SV=1	tr|A0A287BCR7|A0A287BCR7_PIG	O75663	27 kDa	0.61	2.3
DNA-(apurinic or apyrimidinic site) lyase OS=Sus scrofa OX=9823 GN=APEX1 PE=1 SV=1	tr|A0A287BTC2|A0A287BTC2_PIG	P27695	35 kDa	0.61	0.6
Serine-threonine kinase receptor-associated protein OS=Sus scrofa OX=9823 GN=STRAP PE=1 SV=1	tr|A0A480YLE4|A0A480YLE4_PIG	Q9Y3F4	39 kDa	0.61	1.2
DnaJ heat shock protein family (Hsp40) member C11 OS=Sus scrofa OX=9823 GN=DNAJC11 PE=1 SV=1	tr|A0A5G2QN68|A0A5G2QN68_PIG (+1)	Q9NVH1	57 kDa	0.61	0.6
ATP synthase membrane subunit DAPIT OS=Sus scrofa OX=9823 GN=ATP5MD PE=1 SV=1	tr|F1RFD4|F1RFD4_PIG	Q96IX5	6 kDa	0.61	1.2
Isochorismatase domain containing 1 OS=Sus scrofa OX=9823 GN=ISOC1 PE=4 SV=2	tr|F1RKJ9|F1RKJ9_PIG	Q96CN7	31 kDa	0.61	1.2
Asporin OS=Sus scrofa OX=9823 GN=ASPN PE=1 SV=1	tr|F1SUE4|F1SUE4_PIG	Q9BXN1	42 kDa	0.61	1.3
40S ribosomal protein S3a OS=Sus scrofa OX=9823 GN=RPS3A PE=1 SV=1	tr|F2Z5C7|F2Z5C7_PIG	P61247	30 kDa	0.61	1.5
Cdc42-interacting protein 4 isoform 1 OS=Sus scrofa OX=9823 GN=TRIP10 PE=1 SV=3	tr|I3LAS2|I3LAS2_PIG	Q15642	68 kDa	0.61	1.7
Multiple coagulation factor deficiency 2 OS=Sus scrofa OX=9823 GN=MCFD2 PE=1 SV=3	tr|K7GQY4|K7GQY4_PIG	Q8NI22	26 kDa	0.61	0.5
Sarcoplasmic/endoplasmic reticulum calcium ATPase 2 OS=Sus scrofa OX=9823 GN=ATP2A2 PE=1 SV=1	sp|P11607|AT2A2_PIG (+2)	P16615	115 kDa	0.62	1.2
Aldo-keto reductase family 1 member A1 OS=Sus scrofa OX=9823 GN=AKR1A1 PE=1 SV=3	sp|P50578|AK1A1_PIG	P14550	37 kDa	0.62	1.2
Cystatin-B OS=Sus scrofa OX=9823 GN=CSTB PE=1 SV=1	sp|Q29290|CYTB_PIG	P04080	11 kDa	0.62	1.2
Junction plakoglobin OS=Sus scrofa OX=9823 GN=Jup PE=2 SV=1	sp|Q8WNW3|PLAK_PIG	P14923	82 kDa	0.62	1.1
Myosin-4 OS=Sus scrofa OX=9823 GN=MYH4 PE=2 SV=1	sp|Q9TV62|MYH4_PIG	Q9Y623	223 kDa	0.62	1.8
Keratin 7 OS=Sus scrofa OX=9823 GN=KRT7 PE=3 SV=1	tr|A0A287AG48|A0A287AG48_PIG	P08729	52 kDa	0.62	1.8
Platelet activating factor acetylhydrolase 1b catalytic subunit 2 OS=Sus scrofa OX=9823 GN=PAFAH1B2 PE=1 SV=1	tr|A0A287ALL0|A0A287ALL0_PIG	P68402	26 kDa	0.62	0.8
Delta-aminolevulinic acid dehydratase OS=Sus scrofa OX=9823 GN=ALAD PE=1 SV=2	tr|A0A287BGW4|A0A287BGW4_PIG	P13716	34 kDa	0.62	1.2
Nucleobindin 1 OS=Sus scrofa OX=9823 GN=NUCB1 PE=1 SV=1	tr|A0A5G2RF91|A0A5G2RF91_PIG	Q02818	52 kDa	0.62	0.6
Ubiquinol-cytochrome c reductase, Rieske iron-sulfur polypeptide 1 OS=Sus scrofa OX=9823 GN=UQCRFS1 PE=1 SV=2	tr|F1RNZ1|F1RNZ1_PIG	P47985	32 kDa	0.62	1.1
Cytochrome b-c1 complex subunit 6 OS=Sus scrofa OX=9823 GN=LOC100524873 PE=1 SV=1	tr|F1S3W0|F1S3W0_PIG	P07919	11 kDa	0.62	0.9
Amine oxidase OS=Sus scrofa OX=9823 GN=MAOB PE=1 SV=2	tr|K7GKH7|K7GKH7_PIG	Q8TBI1	57 kDa	0.62	1.2
Glyceraldehyde-3-phosphate dehydrogenase OS=Sus scrofa OX=9823 GN=GAPDH PE=1 SV=4	sp|P00355|G3P_PIG	P04406	36 kDa	0.63	1.1
Adenosylhomocysteinase OS=Sus scrofa OX=9823 GN=AHCY PE=3 SV=3	sp|Q710C4|SAHH_PIG	P23526	48 kDa	0.63	0.6
Tubulin beta chain OS=Sus scrofa OX=9823 GN=TUBB PE=2 SV=1	sp|Q767L7|TBB5_PIG (+1)	P07437	50 kDa	0.63	1.1
Pyruvate kinase OS=Sus scrofa OX=9823 GN=PKM PE=1 SV=2	tr|A0A286ZI36|A0A286ZI36_PIG	P14618	71 kDa	0.63	0.6
Synaptopodin OS=Sus scrofa OX=9823 GN=SYNPO PE=4 SV=2	tr|A0A286ZLL9|A0A286ZLL9_PIG	Q8N3V7	94 kDa	0.63	0.9
Tubulin polymerization promoting protein OS=Sus scrofa OX=9823 GN=TPPP PE=1 SV=1	tr|A0A286ZLY5|A0A286ZLY5_PIG (+1)	O94811	27 kDa	0.63	1.7
Monoglyceride lipase OS=Sus scrofa OX=9823 GN=MGLL PE=4 SV=2	tr|A0A286ZUB0|A0A286ZUB0_PIG	Q99685	50 kDa	0.63	1.3
BCS1 homolog, ubiquinol-cytochrome c reductase complex chaperone OS=Sus scrofa OX=9823 GN=BCS1L PE=1 SV=1	tr|A0A287AKM3|A0A287AKM3_PIG	Q9Y276	47 kDa	0.63	0.7
Nuclear cap binding protein subunit 1 OS=Sus scrofa OX=9823 GN=NCBP1 PE=1 SV=1	tr|A0A287BCZ0|A0A287BCZ0_PIG	Q09161	40 kDa	0.63	1.4
Lymphocyte specific protein 1 OS=Sus scrofa OX=9823 GN=LSP1 PE=4 SV=1	tr|A0A287BI62|A0A287BI62_PIG	P33241	38 kDa	0.63	0.6
Sorting nexin 2 OS=Sus scrofa OX=9823 GN=SNX2 PE=1 SV=2	tr|A0A287BMK7|A0A287BMK7_PIG	O60749	59 kDa	0.63	1.8
GB1/RHD3-type G domain-containing protein OS=Sus scrofa OX=9823 GN=GBP1 PE=1 SV=2	tr|A0A287BSF6|A0A287BSF6_PIG	P32455	68 kDa	0.63	2.2
Mitochondrial amidoxime reducing component 2 OS=Sus scrofa OX=9823 GN=MARC2 PE=1 SV=1	tr|A0A481BCG1|A0A481BCG1_PIG	Q969Z3	37 kDa	0.63	0.8
Ectonucleotide pyrophosphatase/phosphodiesterase family member 6 OS=Sus scrofa OX=9823 GN=ENPP6 PE=4 SV=3	tr|F1RSZ8|F1RSZ8_PIG	Q6UWR7	51 kDa	0.63	1.7
Reticulocalbin 2 OS=Sus scrofa OX=9823 GN=RCN2 PE=1 SV=4	tr|F1SJ93|F1SJ93_PIG	Q14257	37 kDa	0.63	0.7
Clathrin heavy chain OS=Sus scrofa OX=9823 GN=CLTC PE=1 SV=3	tr|I3LGD4|I3LGD4_PIG	Q00610	189 kDa	0.63	1.2
N-ribosyldihydronicotinamide:quinone reductase 2 OS=Sus scrofa OX=9823 GN=NQO2 PE=1 SV=2	tr|I3LLY4|I3LLY4_PIG	P16083	26 kDa	0.63	0.7
Acetyl-CoA acetyltransferase 1 OS=Sus scrofa OX=9823 GN=ACAT1 PE=1 SV=2	tr|I3LP02|I3LP02_PIG	P24752	45 kDa	0.63	0.9
Succinate dehydrogenase cytochrome b560 subunit, mitochondrial OS=Sus scrofa OX=9823 GN=SDHC PE=1 SV=2	sp|D0VWV4|C560_PIG	Q99643	19 kDa	0.64	1.2
Selenium binding protein 1 OS=Sus scrofa OX=9823 GN=SELENBP1 PE=4 SV=2	tr|A0A286ZTB0|A0A286ZTB0_PIG	Q13228	54 kDa	0.64	0.8
5-demethoxyubiquinone hydroxylase, mitochondrial OS=Sus scrofa OX=9823 GN=COQ7 PE=3 SV=1	tr|A0A287A0B5|A0A287A0B5_PIG	Q99807	24 kDa	0.64	0.9
Multifunctional fusion protein OS=Sus scrofa OX=9823 GN=PKM PE=1 SV=1	tr|A0A287A7R4|A0A287A7R4_PIG (+1)	Not present in human	129 kDa	0.64	1.1
Mitochondrial 2-oxoglutarate/malate carrier protein isoform 1 OS=Sus scrofa OX=9823 GN=SLC25A11 PE=1 SV=1	tr|A0A287AN76|A0A287AN76_PIG	Q02978	34 kDa	0.64	1.2
S-phase kinase associated protein 1 OS=Sus scrofa OX=9823 GN=SKP1 PE=3 SV=2	tr|A0A287ARU4|A0A287ARU4_PIG (+1)	P63208	19 kDa	0.64	1.1
Proteasome subunit alpha type OS=Sus scrofa OX=9823 GN=PSMA7 PE=1 SV=1	tr|A0A287AT18|A0A287AT18_PIG	O14818	28 kDa	0.64	0.7
Dimethylarginine dimethylaminohydrolase 1 OS=Sus scrofa OX=9823 GN=DDAH1 PE=1 SV=1	tr|A0A287B1T7|A0A287B1T7_PIG	O94760	35 kDa	0.64	1.3
Tubulin beta chain OS=Sus scrofa OX=9823 GN=TUBB6 PE=1 SV=1	tr|A0A287B749|A0A287B749_PIG	Q9BUF5	45 kDa	0.64	0.7
Pyridoxamine 5'-phosphate oxidase OS=Sus scrofa OX=9823 GN=PNPO PE=1 SV=1	tr|A0A287BB89|A0A287BB89_PIG	Q9NVS9	30 kDa	0.64	0.7
Thioredoxin domain containing 12 OS=Sus scrofa OX=9823 GN=TXNDC12 PE=1 SV=1	tr|A0A481A893|A0A481A893_PIG	O95881	19 kDa	0.64	0.7
Leucine zipper and CTNNBIP1 domain containing OS=Sus scrofa OX=9823 GN=LZIC PE=1 SV=1	tr|A0A5G2QIP9|A0A5G2QIP9_PIG	Q8WZA0	20 kDa	0.64	0.7
Dystrophin OS=Sus scrofa OX=9823 GN=DMD PE=4 SV=1	tr|A0A5G2QTV4|A0A5G2QTV4_PIG	P11532	426 kDa	0.64	0.9
Tyrosine 3-monooxygenase/tryptophan 5-monooxygenase activation protein theta OS=Sus scrofa OX=9823 GN=YWHAQ PE=1 SV=1	tr|A0A5G2QZA1|A0A5G2QZA1_PIG	P27348	28 kDa	0.64	1.1
Aldo_ket_red domain-containing protein OS=Sus scrofa OX=9823 GN=AKR7A2 PE=1 SV=1	tr|A0A5G2R0M9|A0A5G2R0M9_PIG (+1)	O43488	37 kDa	0.64	0.9
NADH dehydrogenase [ubiquinone] flavoprotein 1, mitochondrial OS=Sus scrofa OX=9823 GN=NDUFV1 PE=1 SV=1	tr|F1RVN1|F1RVN1_PIG	P49821	51 kDa	0.64	0.9
cAMP-dependent protein kinase catalytic subunit alpha OS=Sus scrofa OX=9823 GN=PRKACA PE=3 SV=1	tr|F1SD45|F1SD45_PIG	P17612	41 kDa	0.64	1.1
NADH dehydrogenase [ubiquinone] 1 alpha subcomplex subunit 10, mitochondrial OS=Sus scrofa OX=9823 GN=NDUFA10 PE=1 SV=1	tr|F1SIS9|F1SIS9_PIG	O95299	40 kDa	0.64	0.9
Nitrilase family member 2 OS=Sus scrofa OX=9823 GN=NIT2 PE=1 SV=3	tr|F1SKY2|F1SKY2_PIG	Q9NQR4	31 kDa	0.64	0.9
Phosphatidylinositol binding clathrin assembly protein OS=Sus scrofa OX=9823 GN=PICALM PE=1 SV=4	tr|F1STS9|F1STS9_PIG	Q13492	76 kDa	0.64	1.7
Polyadenylate-binding protein OS=Sus scrofa OX=9823 GN=PABPC1 PE=3 SV=1	tr|F2Z557|F2Z557_PIG	P11940	71 kDa	0.64	0.9
RAP1A, member of RAS oncogene family OS=Sus scrofa OX=9823 GN=RAP1A PE=4 SV=3	tr|F2Z5K3|F2Z5K3_PIG	P62834	21 kDa	0.64	0.8
Synaptic vesicle membrane protein VAT-1 homolog OS=Sus scrofa OX=9823 GN=VAT1 PE=1 SV=1	tr|I3L9V2|I3L9V2_PIG	Q99536	43 kDa	0.64	1.4
Reticulocalbin 3 OS=Sus scrofa OX=9823 GN=RCN3 PE=4 SV=3	tr|I3LMU6|I3LMU6_PIG	Q96D15	38 kDa	0.64	0.7
DNA polymerase delta interacting protein 2 OS=Sus scrofa OX=9823 GN=POLDIP2 PE=1 SV=2	tr|I3LMX3|I3LMX3_PIG	Q9Y2S7	42 kDa	0.64	1.4
Peptidylprolyl isomerase OS=Sus scrofa OX=9823 GN=FKBP3 PE=1 SV=2	tr|I3LR51|I3LR51_PIG	Q00688	29 kDa	0.64	1.1
LIM and SH3 domain protein 1 OS=Sus scrofa OX=9823 GN=LASP1 PE=1 SV=1	tr|M3VJZ7|M3VJZ7_PIG	Q14847	30 kDa	0.64	0.9
Superoxide dismutase [Cu-Zn] OS=Sus scrofa OX=9823 GN=SOD1 PE=1 SV=2	sp|P04178|SODC_PIG	P00441	16 kDa	0.65	0.8
Phospholipid hydroperoxide glutathione peroxidase OS=Sus scrofa OX=9823 GN=GPX4 PE=1 SV=3	sp|P36968|GPX4_PIG	P36969	22 kDa	0.65	1.2
Dehydrogenase/reductase SDR family member 4 OS=Sus scrofa OX=9823 GN=DHRS4 PE=1 SV=2	sp|Q8WNV7|DHRS4_PIG	Q9BTZ2	30 kDa	0.65	1.1
Apolipoprotein H OS=Sus scrofa OX=9823 GN=APOH PE=1 SV=1	tr|A0A286ZFW3|A0A286ZFW3_PIG	P02749	38 kDa	0.65	0.9
Acyl-CoA synthetase short chain family member 3 OS=Sus scrofa OX=9823 GN=ACSS3 PE=1 SV=1	tr|A0A286ZJB9|A0A286ZJB9_PIG (+2)	Q9H6R3	75 kDa	0.65	1.2
AKAP2_C domain-containing protein OS=Sus scrofa OX=9823 GN=PALM2-AKAP2 PE=1 SV=2	tr|A0A286ZTZ2|A0A286ZTZ2_PIG	Q9Y2D5	143 kDa	0.65	0.8
Succinate--CoA ligase [GDP-forming] subunit beta, mitochondrial OS=Sus scrofa OX=9823 GN=SUCLG2 PE=3 SV=1	tr|A0A286ZWJ9|A0A286ZWJ9_PIG	Q96I99	50 kDa	0.65	1.1
Secernin 3 OS=Sus scrofa OX=9823 GN=SCRN3 PE=1 SV=1	tr|A0A287A4K2|A0A287A4K2_PIG (+1)	Q0VDG4	48 kDa	0.65	1.4
PDZ and LIM domain 5 OS=Sus scrofa OX=9823 GN=PDLIM5 PE=1 SV=1	tr|A0A287A7G2|A0A287A7G2_PIG	Q96HC4	26 kDa	0.65	0.9
Programmed cell death 6 OS=Sus scrofa OX=9823 GN=PDCD6 PE=1 SV=2	tr|A0A287AKU6|A0A287AKU6_PIG	PDCD6	33 kDa	0.65	1.4
60S ribosomal protein L5 OS=Sus scrofa OX=9823 GN=RPL5 PE=1 SV=1	tr|A0A287ASD0|A0A287ASD0_PIG (+1)	P46777	34 kDa	0.65	0.9
Heterogeneous nuclear ribonucleoprotein A2/B1 OS=Sus scrofa OX=9823 GN=HNRNPA2B1 PE=4 SV=1	tr|A0A287AW32|A0A287AW32_PIG	P22626	38 kDa	0.65	0.9
Laminin subunit beta-2 OS=Sus scrofa OX=9823 GN=LAMB2 PE=1 SV=1	tr|A0A287AWV5|A0A287AWV5_PIG	P55268	205 kDa	0.65	0.9
Neurolysin, mitochondrial OS=Sus scrofa OX=9823 GN=NLN PE=1 SV=1	tr|A0A480E8P3|A0A480E8P3_PIG	Q9BYT8	85 kDa	0.65	1.7
Flotillin OS=Sus scrofa OX=9823 GN=FLOT2 PE=1 SV=1	tr|A0A480TGV2|A0A480TGV2_PIG	Q14254	47 kDa	0.65	1.4
Ubiquitin carboxyl-terminal hydrolase OS=Sus scrofa OX=9823 GN=USP5 PE=1 SV=1	tr|A0A5G2Q6L8|A0A5G2Q6L8_PIG (+1)	P45974	94 kDa	0.65	1.2
Uncharacterized protein OS=Sus scrofa OX=9823 GN=SELENOO PE=1 SV=1	tr|A0A5G2Q861|A0A5G2Q861_PIG (+1)		73 kDa	0.65	1.7
3-hydroxyisobutyrate dehydrogenase OS=Sus scrofa OX=9823 GN=HIBADH PE=1 SV=1	tr|A0A5G2QR28|A0A5G2QR28_PIG	P31937	40 kDa	0.65	0.9
Nitrilase 1 OS=Sus scrofa OX=9823 GN=NIT1 PE=1 SV=1	tr|A0A5G2R398|A0A5G2R398_PIG	Q86X76	34 kDa	0.65	0.6
Coagulation factor IX OS=Sus scrofa OX=9823 GN=F9 PE=1 SV=3	tr|F1RQ75|F1RQ75_PIG	P00740	52 kDa	0.65	0.8
Ig-like domain-containing protein OS=Sus scrofa OX=9823 GN=CCDC141 PE=4 SV=4	tr|F1RZC6|F1RZC6_PIG	Q6ZP82	174 kDa	0.65	1.2
CHCH domain-containing protein OS=Sus scrofa OX=9823 GN=NDUFA8 PE=1 SV=3	tr|F1SLR1|F1SLR1_PIG	P51970	28 kDa	0.65	0.9
Lactotransferrin OS=Sus scrofa OX=9823 GN=LTF PE=1 SV=1	tr|Q6YT39|Q6YT39_PIG	P02788	78 kDa	0.65	1.3
Fatty acid-binding protein, adipocyte OS=Sus scrofa OX=9823 GN=FABP4 PE=1 SV=3	sp|O97788|FABP4_PIG	P15090	15 kDa	0.66	1.1
Bifunctional coenzyme A synthase OS=Sus scrofa OX=9823 GN=COASY PE=1 SV=1	sp|Q8MIR4|COASY_PIG (+1)	Q13057	62 kDa	0.66	0.8
Sepiapterin reductase OS=Sus scrofa OX=9823 GN=SPR PE=4 SV=2	tr|A0A286ZKH3|A0A286ZKH3_PIG	P35270	28 kDa	0.66	1.1
Sorting nexin 12 OS=Sus scrofa OX=9823 GN=SNX12 PE=1 SV=1	tr|A0A286ZKH8|A0A286ZKH8_PIG (+1)	Q9UMY4	19 kDa	0.66	2
Uncharacterized protein OS=Sus scrofa OX=9823 GN=MANF PE=1 SV=1	tr|A0A287A2R1|A0A287A2R1_PIG (+1)		21 kDa	0.66	1.3
Heterogeneous nuclear ribonucleoprotein H3 OS=Sus scrofa OX=9823 GN=HNRNPH3 PE=1 SV=1	tr|A0A287A6R2|A0A287A6R2_PIG	P31942	37 kDa	0.66	1.2
Adenylate kinase 2, mitochondrial OS=Sus scrofa OX=9823 GN=AK2 PE=1 SV=1	tr|A0A287AH85|A0A287AH85_PIG (+2)	P54819	26 kDa	0.66	1.1
ST13 Hsp70 interacting protein OS=Sus scrofa OX=9823 GN=ST13 PE=1 SV=1	tr|A0A287B8B1|A0A287B8B1_PIG	P50502	41 kDa	0.66	1.2
Ribosomal protein OS=Sus scrofa OX=9823 GN=RPL10A PE=1 SV=2	tr|A0A287BSA8|A0A287BSA8_PIG	P62906	25 kDa	0.66	1.3
Elongation factor 1-alpha OS=Sus scrofa OX=9823 GN=EEF1A1 PE=1 SV=2	tr|A0A288CG57|A0A288CG57_PIG	P68104	49 kDa	0.66	0.9
DEK proto-oncogene OS=Sus scrofa OX=9823 GN=DEK PE=1 SV=1	tr|A0A5G2QII0|A0A5G2QII0_PIG (+1)	P35659	44 kDa	0.66	0.8
Actin-related protein 2/3 complex subunit 5 OS=Sus scrofa OX=9823 GN=ARPC5L PE=1 SV=1	tr|A0A5K1VDW0|A0A5K1VDW0_PIG	Q9BPX5	33 kDa	0.66	1.2
3-ketoacyl-CoA thiolase, mitochondrial OS=Sus scrofa OX=9823 GN=ACAA2 PE=1 SV=1	tr|D0G0B3|D0G0B3_PIG	P42765	42 kDa	0.66	1.1
Prefoldin subunit 6 OS=Sus scrofa OX=9823 GN=PFDN6 PE=4 SV=1	tr|F1RZT2|F1RZT2_PIG	O15212	15 kDa	0.66	2
Elongin B OS=Sus scrofa OX=9823 GN=ELOB PE=1 SV=1	tr|F1SUG4|F1SUG4_PIG	Q15370	13 kDa	0.66	0.9
RAB18, member RAS oncogene family OS=Sus scrofa OX=9823 GN=RAB18 PE=1 SV=1	tr|I3LC07|I3LC07_PIG	Q9NP72	23 kDa	0.66	1.4
Sep15_SelM domain-containing protein OS=Sus scrofa OX=9823 GN=SELENOM PE=1 SV=2	tr|I3LF57|I3LF57_PIG	Q8WWX9	16 kDa	0.66	0.5
Acyl-CoA dehydrogenase family member 9 OS=Sus scrofa OX=9823 GN=ACAD9 PE=1 SV=2	tr|I3LUR5|I3LUR5_PIG	Q9H845	69 kDa	0.66	1.2
Ubiquitous tropomodulin U-Tmod OS=Sus scrofa OX=9823 GN=TMOD3 PE=1 SV=1	tr|Q9N0Y9|Q9N0Y9_PIG	Q9NYL9	40 kDa	0.66	0.9
Cystathionine gamma-lyase OS=Sus scrofa OX=9823 GN=CTH PE=2 SV=1	sp|Q19QT7|CGL_PIG	P32929	44 kDa	0.67	2
5'-nucleotidase OS=Sus scrofa OX=9823 GN=NT5C3A PE=1 SV=1	tr|A0A287A1I0|A0A287A1I0_PIG	Q9H0P0	33 kDa	0.67	2
Apolipoprotein B OS=Sus scrofa OX=9823 GN=APOB PE=1 SV=1	tr|A0A287AG13|A0A287AG13_PIG	P04114	517 kDa	0.67	2
Nicotinamide phosphoribosyltransferase OS=Sus scrofa OX=9823 GN=NAMPT PE=1 SV=2	tr|A0A287B8D3|A0A287B8D3_PIG	P43490	54 kDa	0.67	0.5
CS domain-containing protein OS=Sus scrofa OX=9823 GN=NUDC PE=1 SV=1	tr|A0A287B8R2|A0A287B8R2_PIG	Q9Y266	47 kDa	0.67	0.5
Fermitin family member 3 OS=Sus scrofa OX=9823 GN=FERMT3 PE=1 SV=1	tr|A0A287BS42|A0A287BS42_PIG	Q86UX7	76 kDa	0.67	2
Prefoldin subunit 5 OS=Sus scrofa OX=9823 GN=PFDN5 PE=1 SV=1	tr|A0A5G2QK10|A0A5G2QK10_PIG	Q99471	12 kDa	0.67	0.5
40S ribosomal protein S3 OS=Sus scrofa OX=9823 GN=RPS3 PE=1 SV=1	tr|A0A5G2QUQ6|A0A5G2QUQ6_PIG	P61247	29 kDa	0.67	1.3
Serine and arginine rich splicing factor 4 OS=Sus scrofa OX=9823 GN=SRSF4 PE=1 SV=1	tr|A0A5G2R0S9|A0A5G2R0S9_PIG	Q08170	41 kDa	0.67	0.9
EH domain containing 1 OS=Sus scrofa OX=9823 GN=EHD1 PE=1 SV=1	tr|A0A5G2RHH2|A0A5G2RHH2_PIG	Q9H4M9	61 kDa	0.67	0.9
Alpha-actinin-2 isoform 1 OS=Sus scrofa OX=9823 GN=ACTN2 PE=1 SV=1	tr|F1RHL9|F1RHL9_PIG	P35609	104 kDa	0.67	1.1
STE20 like kinase OS=Sus scrofa OX=9823 GN=SLK PE=1 SV=4	tr|F1S5P2|F1S5P2_PIG	Q9H2G2	139 kDa	0.67	0.5
Fetuin B OS=Sus scrofa OX=9823 GN=FETUB PE=1 SV=3	tr|F1SFI6|F1SFI6_PIG	Q9UGM5	41 kDa	0.67	0.5
26S proteasome non-ATPase regulatory subunit 1 OS=Sus scrofa OX=9823 GN=PSMD1 PE=1 SV=3	tr|F1SMW9|F1SMW9_PIG	Q99460	106 kDa	0.67	1.3
Protein phosphatase 1E OS=Sus scrofa OX=9823 GN=PPM1E PE=1 SV=2	tr|I3LNY3|I3LNY3_PIG	Q8WY54	83 kDa	0.67	0.9
Ras homolog family member A OS=Sus scrofa OX=9823 GN=RHOA PE=1 SV=1	tr|I3LVS7|I3LVS7_PIG	P61586	22 kDa	0.67	0.9
Fatty acid-binding protein, heart OS=Sus scrofa OX=9823 GN=FABP3 PE=2 SV=3	sp|O02772|FABPH_PIG	P05413	15 kDa	0.68	0.9
Fructose-1,6-bisphosphatase 1 OS=Sus scrofa OX=9823 GN=FBP1 PE=1 SV=4	sp|P00636|F16P1_PIG	P09467	37 kDa	0.68	0.8
40S ribosomal protein S16 OS=Sus scrofa OX=9823 GN=RPS16 PE=1 SV=4	sp|Q29201|RS16_PIG	P62249	16 kDa	0.68	0.7
Dehydrogenase/reductase 7C OS=Sus scrofa OX=9823 GN=DHRS7C PE=1 SV=1	tr|A0A286ZKE7|A0A286ZKE7_PIG (+1)	A6NNS2	34 kDa	0.68	0.8
Filamin A OS=Sus scrofa OX=9823 GN=FLNA PE=1 SV=1	tr|A0A287A4W0|A0A287A4W0_PIG (+2)	P21333	303 kDa	0.68	0.8
Acyl carrier protein OS=Sus scrofa OX=9823 GN=NDUFAB1 PE=1 SV=1	tr|A0A287AAR5|A0A287AAR5_PIG	O14561	17 kDa	0.68	1.1
Calmodulin OS=Sus scrofa OX=9823 GN=CALM3 PE=1 SV=1	tr|A0A287AHS0|A0A287AHS0_PIG (+1)	P0DP25	17 kDa	0.68	0.9
Perilipin 5 OS=Sus scrofa OX=9823 GN=PLIN5 PE=1 SV=3	tr|F1S7K2|F1S7K2_PIG	Q00G26	38 kDa	0.68	0.6
40S ribosomal protein S13 OS=Sus scrofa OX=9823 GN=RPS13 PE=1 SV=4	tr|F6Q5P0|F6Q5P0_PIG	P62277	24 kDa	0.68	1.3
X-prolyl aminopeptidase (Aminopeptidase P) 1, soluble OS=Sus scrofa OX=9823 GN=XPNPEP1 PE=1 SV=1	tr|K9IVF7|K9IVF7_PIG	Q9NQW7	75 kDa	0.68	1.2
Desmin OS=Sus scrofa OX=9823 GN=DES PE=1 SV=4	sp|P02540|DESM_PIG	P17661	54 kDa	0.69	0.9
14 kDa phosphohistidine phosphatase OS=Sus scrofa OX=9823 GN=PHPT1 PE=1 SV=2	sp|P59083|PHP14_PIG	Q9NRX4	14 kDa	0.69	1.1
Cytochrome c oxidase subunit 7C, mitochondrial OS=Sus scrofa OX=9823 GN=COX7C PE=1 SV=1	sp|Q1W0Y2|COX7C_PIG	P15954	7 kDa	0.69	1.4
Peroxiredoxin OS=Sus scrofa OX=9823 GN=PRDX1 PE=1 SV=1	tr|A0A286ZND5|A0A286ZND5_PIG	Q06830	25 kDa	0.69	0.9
Galectin 3 binding protein OS=Sus scrofa OX=9823 GN=LGALS3BP PE=4 SV=2	tr|A0A287A604|A0A287A604_PIG (+1)	Q08380	56 kDa	0.69	0.5
Succinate--CoA ligase [ADP-forming] subunit beta, mitochondrial OS=Sus scrofa OX=9823 GN=SUCLA2 PE=1 SV=1	tr|A0A287AR48|A0A287AR48_PIG	Q9P2R7	50 kDa	0.69	1.1
Ribosomal protein S2 OS=Sus scrofa OX=9823 GN=RPS2 PE=1 SV=1	tr|A0A287ASU4|A0A287ASU4_PIG	P15880	31 kDa	0.69	1.3
Inositol-3-phosphate synthase 1 OS=Sus scrofa OX=9823 GN=ISYNA1 PE=4 SV=1	tr|A0A287AXJ7|A0A287AXJ7_PIG	Q9NPH2	61 kDa	0.69	0.8
V-type proton ATPase catalytic subunit A OS=Sus scrofa OX=9823 GN=ATP6V1A PE=1 SV=1	tr|A0A287B673|A0A287B673_PIG	P38606	68 kDa	0.69	1.4
Cathepsin S OS=Sus scrofa OX=9823 GN=CTSS PE=1 SV=1	tr|A0A287BNW9|A0A287BNW9_PIG (+1)	P25774	37 kDa	0.69	0.5
Profilin OS=Sus scrofa OX=9823 GN=PFN2 PE=1 SV=1	tr|A0A5G2QQU9|A0A5G2QQU9_PIG	P35080	21 kDa	0.69	1.4
NAC-A/B domain-containing protein OS=Sus scrofa OX=9823 GN=NACA PE=1 SV=1	tr|A0A5G2R5U8|A0A5G2R5U8_PIG	E9PAV3	15 kDa	0.69	0.9
Amine oxidase OS=Sus scrofa OX=9823 GN=MAOA PE=1 SV=3	tr|F1RX00|F1RX00_PIG	P21397	102 kDa	0.69	0.6
Prefoldin subunit 2 OS=Sus scrofa OX=9823 GN=PFDN2 PE=1 SV=1	tr|F1S192|F1S192_PIG	Q9UHV9	17 kDa	0.69	1.1
NADH:ubiquinone oxidoreductase subunit A6 OS=Sus scrofa OX=9823 GN=NDUFA6 PE=3 SV=3	tr|F1SJP6|F1SJP6_PIG	P56556	18 kDa	0.69	1.1
Mitochondrial fission regulator 1 like OS=Sus scrofa OX=9823 GN=MTFR1L PE=4 SV=3	tr|F1STT6|F1STT6_PIG	Q9H019	32 kDa	0.69	1.3
Tripeptidyl peptidase 1 OS=Sus scrofa OX=9823 GN=TPP1 PE=1 SV=1	tr|I3L812|I3L812_PIG	O14773	62 kDa	0.69	1.3
Cytochrome b5 OS=Sus scrofa OX=9823 GN=CYB5A PE=1 SV=3	sp|P00172|CYB5_PIG	P00167	15 kDa	0.7	0.9
Azurocidin OS=Sus scrofa OX=9823 GN=AZU1 PE=1 SV=2	sp|P80015|CAP7_PIG	P20160	27 kDa	0.7	0.6
m7GpppX diphosphatase OS=Sus scrofa OX=9823 GN=DCPS PE=2 SV=1	sp|Q8MIZ3|DCPS_PIG	Q96C86	39 kDa	0.7	1.3
IlvB acetolactate synthase like OS=Sus scrofa OX=9823 GN=ILVBL PE=3 SV=2	tr|A0A286ZIW5|A0A286ZIW5_PIG	A1L0T0	70 kDa	0.7	0.8
LRR binding FLII interacting protein 2 OS=Sus scrofa OX=9823 GN=LRRFIP2 PE=4 SV=2	tr|A0A286ZZZ5|A0A286ZZZ5_PIG	Q9Y608	83 kDa	0.7	0.8
BRO1 domain-containing protein OS=Sus scrofa OX=9823 GN=PDCD6IP PE=1 SV=2	tr|A0A287A5B4|A0A287A5B4_PIG (+2)	Not present in human	84 kDa	0.7	0.9
60S ribosomal protein L27a OS=Sus scrofa OX=9823 GN=RPL27A PE=3 SV=2	tr|A0A287AWS4|A0A287AWS4_PIG	P46776	17 kDa	0.7	0.8
Nicotinamide nucleotide transhydrogenase OS=Sus scrofa OX=9823 GN=NNT PE=1 SV=1	tr|A0A287B1U9|A0A287B1U9_PIG	Q13423	117 kDa	0.7	1.1
Proteasome 26S subunit, ATPase 4 OS=Sus scrofa OX=9823 GN=PSMC4 PE=3 SV=1	tr|A0A287B4P8|A0A287B4P8_PIG	P43686	47 kDa	0.7	0.9
TOM1-like protein 2 isoform 3 OS=Sus scrofa OX=9823 GN=TOM1L2 PE=3 SV=1	tr|A0A287BAN7|A0A287BAN7_PIG	Q6ZVM7	54 kDa	0.7	1.3
Uncharacterized protein OS=Sus scrofa OX=9823 GN=UTRN PE=1 SV=1	tr|A0A5G2QSI7|A0A5G2QSI7_PIG (+1)		394 kDa	0.7	1.3
Glutathione S-transferase OS=Sus scrofa OX=9823 PE=1 SV=1	tr|A0A5G2R4D9|A0A5G2R4D9_PIG	Q6FGJ9	41 kDa	0.7	1.1
Ubiquinol-cytochrome c reductase complex III subunit VII OS=Sus scrofa OX=9823 GN=UQCRQ PE=1 SV=1	tr|F1RI18|F1RI18_PIG	O14949	10 kDa	0.7	0.9
Actin binding LIM protein 1 OS=Sus scrofa OX=9823 GN=ABLIM1 PE=1 SV=4	tr|F1S4V5|F1S4V5_PIG	O14639	94 kDa	0.7	1.1
Plasminogen activator inhibitor 1 RNA-binding protein isoform 1 OS=Sus scrofa OX=9823 GN=SERBP1 PE=1 SV=2	tr|F1S827|F1S827_PIG	Q8NC51	45 kDa	0.7	0.9
Septin 2 OS=Sus scrofa OX=9823 GN=SEPTIN2 PE=1 SV=3	tr|F1SIP0|F1SIP0_PIG	Q15019	42 kDa	0.7	1.1
NADH:ubiquinone oxidoreductase subunit A9 OS=Sus scrofa OX=9823 GN=NDUFA9 PE=1 SV=3	tr|F1SL07|F1SL07_PIG	Q16795	46 kDa	0.7	1.1
4'-phosphopantetheine phosphatase OS=Sus scrofa OX=9823 GN=PANK4 PE=1 SV=2	tr|I3LPY8|I3LPY8_PIG	Q9NVE7	86 kDa	0.7	1.6
Macrophage migration inhibitory factor OS=Sus scrofa OX=9823 GN=MIF PE=1 SV=3	sp|P80928|MIF_PIG	P14174	12 kDa	0.71	1.1
Filamin A OS=Sus scrofa OX=9823 GN=FLNA PE=4 SV=2	tr|A0A286ZXU2|A0A286ZXU2_PIG	P21333	281 kDa	0.71	0.6
Nuclear casein kinase and cyclin dependent kinase substrate 1 OS=Sus scrofa OX=9823 GN=NUCKS1 PE=1 SV=2	tr|A0A287AWH5|A0A287AWH5_PIG	Q9H1E3	27 kDa	0.71	0.7
Aminotran_1_2 domain-containing protein OS=Sus scrofa OX=9823 GN=KYAT1 PE=1 SV=1	tr|A0A5G2QJ54|A0A5G2QJ54_PIG	Q16773	51 kDa	0.71	0.8
Cullin 5 OS=Sus scrofa OX=9823 GN=CUL5 PE=1 SV=1	tr|A0A5G2R2M6|A0A5G2R2M6_PIG	Q93034	90 kDa	0.71	1.2
Uncharacterized protein OS=Sus scrofa OX=9823 GN=PDIA6 PE=1 SV=1	tr|A0A5G2R6R2|A0A5G2R6R2_PIG (+1)		48 kDa	0.71	0.9
Rho GDP dissociation inhibitor alpha OS=Sus scrofa OX=9823 GN=ARHGDIA PE=2 SV=1	tr|E7EI20|E7EI20_PIG	P52565	23 kDa	0.71	1.1
CRK like proto-oncogene, adaptor protein OS=Sus scrofa OX=9823 GN=CRKL PE=1 SV=1	tr|F1RKX9|F1RKX9_PIG	P46109	34 kDa	0.71	1.1
Phosphoglucomutase 2 OS=Sus scrofa OX=9823 GN=PGM2 PE=1 SV=2	tr|F1S4K7|F1S4K7_PIG	Q96G03	70 kDa	0.71	1.4
Pyruvate dehydrogenase E1 component subunit beta OS=Sus scrofa OX=9823 GN=PDHB PE=1 SV=1	tr|F1SGH5|F1SGH5_PIG	P11177	39 kDa	0.71	1.1
SERPIN domain-containing protein OS=Sus scrofa OX=9823 GN=SERPINA3-2 PE=1 SV=1	tr|F6Q469|F6Q469_PIG	Not present in human	46 kDa	0.71	0.8
Ribosome binding protein 1 OS=Sus scrofa OX=9823 GN=RRBP1 PE=1 SV=2	tr|I3LGC2|I3LGC2_PIG	Q9P2E9	161 kDa	0.71	0.8
Ribonuclease inhibitor OS=Sus scrofa OX=9823 GN=RNH1 PE=1 SV=1	sp|P10775|RINI_PIG	P13489	49 kDa	0.72	0.9
EMAP like 2 OS=Sus scrofa OX=9823 GN=EML2 PE=1 SV=1	tr|A0A286ZNW1|A0A286ZNW1_PIG	O95834	92 kDa	0.72	1.2
Galectin OS=Sus scrofa OX=9823 GN=LGALS1 PE=1 SV=1	tr|A0A286ZRI5|A0A286ZRI5_PIG	P09382	15 kDa	0.72	0.9
Uncharacterized protein OS=Sus scrofa OX=9823 PE=1 SV=2	tr|A0A287A0X6|A0A287A0X6_PIG		101 kDa	0.72	0.8
Prostaglandin reductase 3 isoform 1 OS=Sus scrofa OX=9823 GN=ZADH2 PE=1 SV=1	tr|A0A287A6F5|A0A287A6F5_PIG	Q8N4Q0	40 kDa	0.72	0.9
Histone H2B OS=Sus scrofa OX=9823 PE=3 SV=1	tr|A0A287A7G8|A0A287A7G8_PIG	B2R4S9	17 kDa	0.72	1.1
NAD-dependent protein deacylase sirtuin-5, mitochondrial OS=Sus scrofa OX=9823 GN=SIRT5 PE=1 SV=1	tr|A0A287AF07|A0A287AF07_PIG	Q9NXA8	33 kDa	0.72	0.9
Glucosamine-6-phosphate isomerase OS=Sus scrofa OX=9823 GN=GNPDA1 PE=1 SV=1	tr|A0A287AHC2|A0A287AHC2_PIG	P46926	35 kDa	0.72	1.2
C1q domain-containing protein OS=Sus scrofa OX=9823 GN=ADIPOQ PE=1 SV=1	tr|A0A287ASX3|A0A287ASX3_PIG	Q96A54	36 kDa	0.72	0.9
Interleukin enhancer binding factor 2 OS=Sus scrofa OX=9823 GN=ILF2 PE=1 SV=1	tr|A0A5G2RJR2|A0A5G2RJR2_PIG	Q12905	44 kDa	0.72	1.2
Gamma-synuclein OS=Sus scrofa OX=9823 GN=SNCG PE=1 SV=1	tr|A7YX24|A7YX24_PIG	O76070	13 kDa	0.72	0.7
Sodium/potassium-transporting ATPase subunit alpha OS=Sus scrofa OX=9823 GN=ATP1A1 PE=1 SV=1	tr|D2WKD6|D2WKD6_PIG	P05023	113 kDa	0.72	1.1
Alanyl-tRNA synthetase OS=Sus scrofa OX=9823 GN=AARS1 PE=1 SV=4	tr|F1S431|F1S431_PIG	P49588	107 kDa	0.72	1.2
Syntaxin binding protein 3 OS=Sus scrofa OX=9823 GN=STXBP3 PE=3 SV=2	tr|F1S580|F1S580_PIG	O00186	108 kDa	0.72	0.6
Biliverdin reductase B OS=Sus scrofa OX=9823 GN=BLVRB PE=1 SV=2	tr|I3LQH7|I3LQH7_PIG	P30043	22 kDa	0.72	1.1
Superoxide dismutase [Cu-Zn] OS=Sus scrofa OX=9823 GN=SOD3 PE=3 SV=2	tr|I3LUD1|I3LUD1_PIG	P08294	32 kDa	0.72	1.1
Cofilin-1 OS=Sus scrofa OX=9823 GN=CFL1 PE=1 SV=3	sp|P10668|COF1_PIG	E9PS23	19 kDa	0.73	1.1
Prolyl endopeptidase OS=Sus scrofa OX=9823 GN=PREP PE=1 SV=1	sp|P23687|PPCE_PIG	P48147	81 kDa	0.73	1.1
Myosin light polypeptide 6 OS=Sus scrofa OX=9823 GN=MYL6 PE=1 SV=2	sp|P60662|MYL6_PIG	P60660	17 kDa	0.73	1
Galactose mutarotase OS=Sus scrofa OX=9823 GN=GALM PE=2 SV=1	sp|Q9GKX6|GALM_PIG	Q96C23	38 kDa	0.73	1.4
NDRG family member 2 OS=Sus scrofa OX=9823 GN=NDRG2 PE=4 SV=2	tr|A0A286ZIM7|A0A286ZIM7_PIG	Q9UN36	39 kDa	0.73	1.1
SURF1-like protein OS=Sus scrofa OX=9823 GN=SURF1 PE=3 SV=1	tr|A0A286ZU53|A0A286ZU53_PIG	Q15526	33 kDa	0.73	0.7
Pyruvate dehydrogenase phosphatase regulatory subunit OS=Sus scrofa OX=9823 GN=PDPR PE=1 SV=1	tr|A0A287AAG7|A0A287AAG7_PIG	Q8NCN5	99 kDa	0.73	1.3
Serine hydrolase like 2 OS=Sus scrofa OX=9823 GN=SERHL2 PE=1 SV=1	tr|A0A287AJ52|A0A287AJ52_PIG	Q9H4I8	34 kDa	0.73	1.1
NADH:ubiquinone oxidoreductase core subunit S1 OS=Sus scrofa OX=9823 GN=NDUFS1 PE=1 SV=1	tr|A0A287ARY3|A0A287ARY3_PIG (+2)	Not present in human	81 kDa	0.73	1.1
Cortactin OS=Sus scrofa OX=9823 GN=CTTN PE=1 SV=2	tr|A0A287AUL3|A0A287AUL3_PIG	Q14247	72 kDa	0.73	0.9
40S ribosomal protein S4 OS=Sus scrofa OX=9823 GN=RPS4X PE=1 SV=2	tr|A0A287B771|A0A287B771_PIG	P62701	30 kDa	0.73	0.8
Pleckstrin homology domain containing A7 OS=Sus scrofa OX=9823 GN=PLEKHA7 PE=1 SV=2	tr|A0A287BH77|A0A287BH77_PIG	Q6IQ23	148 kDa	0.73	0.8
NADH:ubiquinone oxidoreductase subunit B4 OS=Sus scrofa OX=9823 GN=NDUFB4 PE=1 SV=1	tr|A0A287BPW8|A0A287BPW8_PIG	O95168	15 kDa	0.73	0.9
Proteasome 26S subunit, ATPase 3 OS=Sus scrofa OX=9823 GN=PSMC3 PE=1 SV=1	tr|A0A5G2Q9I2|A0A5G2Q9I2_PIG	P17980	57 kDa	0.73	1.1
6-phosphogluconate dehydrogenase, decarboxylating OS=Sus scrofa OX=9823 GN=PGD PE=1 SV=1	tr|A0A5G2QR34|A0A5G2QR34_PIG	P52209	53 kDa	0.73	1.1
Triosephosphate isomerase OS=Sus scrofa OX=9823 GN=TPI1 PE=1 SV=1	tr|D0G7F6|D0G7F6_PIG	P60174	27 kDa	0.73	0.9
Betaine homocysteine methyltransferase OS=Sus scrofa OX=9823 GN=BHMT PE=1 SV=1	tr|E7D6R2|E7D6R2_PIG	Q93088	45 kDa	0.73	1.3
Dipeptidyl peptidase 3 OS=Sus scrofa OX=9823 GN=DPP3 PE=1 SV=1	tr|F1RU52|F1RU52_PIG	Q9NY33	83 kDa	0.73	0.8
Fibrillar collagen NC1 domain-containing protein OS=Sus scrofa OX=9823 GN=COL1A2 PE=1 SV=2	tr|F1SFA7|F1SFA7_PIG	P08123	104 kDa	0.73	1
NPL4 homolog, ubiquitin recognition factor OS=Sus scrofa OX=9823 GN=NPLOC4 PE=1 SV=3	tr|I3L829|I3L829_PIG	Q8TAT6	84 kDa	0.73	0.7
Calcium/calmodulin-dependent protein kinase type II subunit delta OS=Sus scrofa OX=9823 GN=CAMK2D PE=2 SV=1	sp|Q95266|KCC2D_PIG	Q13557	56 kDa	0.74	0.9
Nipsnap homolog 2 OS=Sus scrofa OX=9823 GN=NIPSNAP2 PE=4 SV=1	tr|A0A287ABB8|A0A287ABB8_PIG	O75323	34 kDa	0.74	0.9
Glutathione peroxidase OS=Sus scrofa OX=9823 GN=GPX3 PE=1 SV=1	tr|A0A287AIJ3|A0A287AIJ3_PIG	P22352	26 kDa	0.74	1.3
Erythrocyte membrane protein band 4.1 like 3 OS=Sus scrofa OX=9823 GN=EPB41L3 PE=1 SV=2	tr|A0A287AV71|A0A287AV71_PIG	Q9Y2J2	102 kDa	0.74	0.9
NADH dehydrogenase ubiquinone iron-sulfur protein 7, mitochondrial OS=Sus scrofa OX=9823 GN=NDUFS7 PE=1 SV=1	tr|A0A287B9B0|A0A287B9B0_PIG	O75251	28 kDa	0.74	1.1
Tubulin beta chain OS=Sus scrofa OX=9823 GN=TUBB4B PE=1 SV=1	tr|A0A5G2QGK1|A0A5G2QGK1_PIG	P68371	50 kDa	0.74	1.1
Proteasome subunit alpha type OS=Sus scrofa OX=9823 GN=PSMA4 PE=1 SV=1	tr|A0A5G2QL81|A0A5G2QL81_PIG	P25789	32 kDa	0.74	0.8
Ubiquitin like modifier activating enzyme 1 OS=Sus scrofa OX=9823 GN=UBA1 PE=1 SV=1	tr|A0A5K1U589|A0A5K1U589_PIG	P22314	114 kDa	0.74	1.1
AA_TRNA_LIGASE_II domain-containing protein OS=Sus scrofa OX=9823 GN=SARS2 PE=1 SV=3	tr|F1RI32|F1RI32_PIG	Q9NP81	59 kDa	0.74	0.6
Ras suppressor protein 1 OS=Sus scrofa OX=9823 GN=RSU1 PE=1 SV=3	tr|F1RW98|F1RW98_PIG	Q15404	32 kDa	0.74	0.9
USO1 vesicle transport factor OS=Sus scrofa OX=9823 GN=USO1 PE=1 SV=3	tr|F1RYU9|F1RYU9_PIG	O60763	104 kDa	0.74	0.9
Endoplasmin OS=Sus scrofa OX=9823 GN=HSP90B1 PE=2 SV=3	sp|Q29092|ENPL_PIG	P14625	92 kDa	0.75	1.6
Caveolin-3 OS=Sus scrofa OX=9823 GN=CAV3 PE=2 SV=1	sp|Q3ZDQ5|CAV3_PIG	P56539	17 kDa	0.75	0.8
Uncharacterized protein OS=Sus scrofa OX=9823 GN=SQOR PE=1 SV=2	tr|A0A286ZL94|A0A286ZL94_PIG (+1)		48 kDa	0.75	0.6
SH3 domain-binding glutamic acid-rich-like protein OS=Sus scrofa OX=9823 GN=SH3BGRL3 PE=1 SV=1	tr|A0A286ZWS0|A0A286ZWS0_PIG	Q9H299	10 kDa	0.75	0.9
EWS RNA binding protein 1 OS=Sus scrofa OX=9823 GN=EWSR1 PE=1 SV=2	tr|A0A286ZXI2|A0A286ZXI2_PIG	Q01844	63 kDa	0.75	0.9
cAMP-dependent protein kinase type II-alpha regulatory subunit OS=Sus scrofa OX=9823 GN=PRKAR2A PE=1 SV=1	tr|A0A287AEK2|A0A287AEK2_PIG	P13861	44 kDa	0.75	1.1
CD36 molecule OS=Sus scrofa OX=9823 GN=CD36 PE=1 SV=1	tr|A0A287AIJ7|A0A287AIJ7_PIG (+1)	P16671	46 kDa	0.75	0.9
Acetyl-coenzyme A synthetase 2-like, mitochondrial isoform 1 OS=Sus scrofa OX=9823 GN=ACSS1 PE=1 SV=1	tr|A0A287B7Q9|A0A287B7Q9_PIG	Q9NUB1	67 kDa	0.75	1.1
Extended synaptotagmin 2 OS=Sus scrofa OX=9823 GN=ESYT2 PE=1 SV=2	tr|A0A287BCJ5|A0A287BCJ5_PIG	A0FGR8	96 kDa	0.75	0.6
Chromosome 11 open reading frame 1 OS=Sus scrofa OX=9823 GN=C11orf1 PE=1 SV=1	tr|A0A480KM31|A0A480KM31_PIG	Not present in human	20 kDa	0.75	0.9
Isochorismatase domain containing 2 OS=Sus scrofa OX=9823 GN=ISOC2 PE=1 SV=1	tr|A0A5G2QW66|A0A5G2QW66_PIG (+1)	Q96AB3	24 kDa	0.75	0.9
5'-nucleotidase, cytosolic IA OS=Sus scrofa OX=9823 GN=NT5C1A PE=1 SV=1	tr|A0A5G2R6Y4|A0A5G2R6Y4_PIG (+1)	Q9BXI3	41 kDa	0.75	0.7
Endoplasmic reticulum resident protein 29 OS=Sus scrofa OX=9823 GN=ERP29 PE=1 SV=2	tr|F1RJM2|F1RJM2_PIG	P30040	29 kDa	0.75	1.1
Reticulocalbin-1 OS=Sus scrofa OX=9823 GN=RCN1 PE=1 SV=3	tr|F1SGP8|F1SGP8_PIG	Q15293	47 kDa	0.75	0.7
Splicing factor 3A subunit 3 isoform 1 OS=Sus scrofa OX=9823 GN=SF3A3 PE=1 SV=1	tr|F1SV40|F1SV40_PIG	Q12874	59 kDa	0.75	1.4
Uncharacterized protein OS=Sus scrofa OX=9823 GN=CSRP3 PE=1 SV=2	tr|F6Q6A7|F6Q6A7_PIG		22 kDa	0.75	1
Phosphotriesterase related OS=Sus scrofa OX=9823 GN=PTER PE=1 SV=2	tr|I3LS53|I3LS53_PIG	Q96BW5	33 kDa	0.75	0.6
S100 calcium binding protein A1 OS=Sus scrofa OX=9823 GN=S100A1 PE=1 SV=3	tr|K7GQ50|K7GQ50_PIG	P23297	20 kDa	0.75	1.1
FUS RNA binding protein OS=Sus scrofa OX=9823 GN=FUS PE=1 SV=2	tr|K7GSY7|K7GSY7_PIG	P35637	53 kDa	0.75	1.1
COP9 signalosome complex subunit 4 OS=Sus scrofa OX=9823 GN=COPS4 PE=2 SV=1	sp|A7Y521|CSN4_PIG	Q9BT78	46 kDa	0.76	0.8
N-acylglucosamine 2-epimerase OS=Sus scrofa OX=9823 GN=RENBP PE=1 SV=2	sp|P17560|RENBP_PIG	P51606	46 kDa	0.76	0.7
Aldehyde dehydrogenase, mitochondrial OS=Sus scrofa OX=9823 GN=ALDH2 PE=2 SV=1	sp|Q2XQV4|ALDH2_PIG	P05091	57 kDa	0.76	0.8
Transgelin OS=Sus scrofa OX=9823 GN=TAGLN PE=1 SV=1	tr|A0A286ZT82|A0A286ZT82_PIG	Q01995	26 kDa	0.76	1.1
Dimethylarginine dimethylaminohydrolase 2 OS=Sus scrofa OX=9823 GN=DDAH2 PE=4 SV=1	tr|A0A287A5S7|A0A287A5S7_PIG	O95865	30 kDa	0.76	1.1
Haloacid dehalogenase like hydrolase domain containing 3 OS=Sus scrofa OX=9823 GN=HDHD3 PE=1 SV=1	tr|A0A287A5Y1|A0A287A5Y1_PIG	Q9BSH5	28 kDa	0.76	0.7
Adipocyte plasma membrane associated protein OS=Sus scrofa OX=9823 GN=APMAP PE=1 SV=1	tr|A0A287A6K7|A0A287A6K7_PIG	Q9HDC9	69 kDa	0.76	1.1
Mitochondrial import inner membrane translocase subunit TIM44 OS=Sus scrofa OX=9823 GN=TIMM44 PE=3 SV=2	tr|A0A287ADX5|A0A287ADX5_PIG	O43615	47 kDa	0.76	0.9
28S ribosomal protein S36, mitochondrial OS=Sus scrofa OX=9823 GN=MRPS36 PE=1 SV=1	tr|A0A287B719|A0A287B719_PIG	P82909	11 kDa	0.76	1.1
Methyl-CpG-binding protein 2 OS=Sus scrofa OX=9823 GN=MECP2 PE=1 SV=1	tr|A0A5G2QE26|A0A5G2QE26_PIG	P51608	52 kDa	0.76	0.7
Uncharacterized protein OS=Sus scrofa OX=9823 GN=PXN PE=4 SV=1	tr|A0A5G2QL63|A0A5G2QL63_PIG (+1)		115 kDa	0.76	1.2
Peroxiredoxin OS=Sus scrofa OX=9823 GN=PRDX5 PE=1 SV=1	tr|A0A5G2R4K5|A0A5G2R4K5_PIG	P30044	17 kDa	0.76	0.9
Wiskott-Aldrich syndrome protein family member OS=Sus scrofa OX=9823 GN=WASF2 PE=1 SV=1	tr|A0A5K1VSC0|A0A5K1VSC0_PIG (+1)	Q9Y6W5	54 kDa	0.76	1.4
Vacuolar protein sorting 36 homolog OS=Sus scrofa OX=9823 GN=VPS36 PE=1 SV=3	tr|F1RMD6|F1RMD6_PIG	Q86VN1	43 kDa	0.76	0.8
Uncharacterized protein OS=Sus scrofa OX=9823 GN=HEBP2 PE=1 SV=2	tr|F1S6A9|F1S6A9_PIG		40 kDa	0.76	1.5
3-hydroxybutyrate dehydrogenase 1 OS=Sus scrofa OX=9823 GN=BDH1 PE=1 SV=3	tr|F1SQX8|F1SQX8_PIG	Q02338	39 kDa	0.76	0.9
ADP-ribosylhydrolase like 2 OS=Sus scrofa OX=9823 GN=ADPRS PE=4 SV=4	tr|F1SV59|F1SV59_PIG	Q9NX46	50 kDa	0.76	1.1
U6 snRNA-associated Sm-like protein LSm8 OS=Sus scrofa OX=9823 GN=LSM8 PE=1 SV=1	tr|F2Z5P9|F2Z5P9_PIG	O95777	10 kDa	0.76	1.4
Cytochrome c oxidase subunit NDUFA4 OS=Sus scrofa OX=9823 GN=NDUFA4 PE=1 SV=1	tr|I3LJI1|I3LJI1_PIG	O00483	15 kDa	0.76	0.9
Elongation factor G, mitochondrial OS=Sus scrofa OX=9823 GN=GFM1 PE=1 SV=2	tr|I3LKJ6|I3LKJ6_PIG	Q96RP9	81 kDa	0.76	0.9
RNA-splicing ligase RtcB homolog OS=Sus scrofa OX=9823 GN=RTCB PE=2 SV=1	sp|Q19PY3|RTCB_PIG (+1)	Q9Y3I0	55 kDa	0.77	0.9
Dicarbonyl and L-xylulose reductase OS=Sus scrofa OX=9823 GN=DCXR PE=4 SV=1	tr|A0A286ZQ44|A0A286ZQ44_PIG	Q7Z4W1	26 kDa	0.77	0.9
Ig-like domain-containing protein OS=Sus scrofa OX=9823 PE=4 SV=2	tr|A0A286ZQQ8|A0A286ZQQ8_PIG	Not present in human	19 kDa	0.77	0.8
ATP synthase subunit gamma OS=Sus scrofa OX=9823 GN=ATP5F1C PE=3 SV=1	tr|A0A287AHM1|A0A287AHM1_PIG	P36542	33 kDa	0.77	0.9
Uncharacterized protein OS=Sus scrofa OX=9823 GN=LOC100624650 PE=1 SV=1	tr|A0A287AW71|A0A287AW71_PIG		22 kDa	0.77	0.8
CutA divalent cation tolerance homolog OS=Sus scrofa OX=9823 GN=CUTA PE=1 SV=1	tr|A0A287BCM2|A0A287BCM2_PIG (+1)	O60888	20 kDa	0.77	0.9
Aspartate aminotransferase OS=Sus scrofa OX=9823 GN=GOT2 PE=1 SV=1	tr|A0A287BH33|A0A287BH33_PIG	P00505	49 kDa	0.77	1.1
Eukaryotic translation initiation factor 4H isoform 2 OS=Sus scrofa OX=9823 GN=EIF4H PE=1 SV=1	tr|A0A480PPD4|A0A480PPD4_PIG	Q15056	25 kDa	0.77	1.1
60S ribosomal protein L3 OS=Sus scrofa OX=9823 GN=RPL3 PE=1 SV=1	tr|A0A5G2Q8T9|A0A5G2Q8T9_PIG	P39023	46 kDa	0.77	1.6
Histone H2A OS=Sus scrofa OX=9823 GN=H2AFX PE=1 SV=1	tr|A0A5G2QMX0|A0A5G2QMX0_PIG	P16104	15 kDa	0.77	1.1
Plakophilin 2 OS=Sus scrofa OX=9823 GN=PKP2 PE=4 SV=1	tr|A0A5G2R2I1|A0A5G2R2I1_PIG	Q99959	93 kDa	0.77	1.1
Keratin 18 OS=Sus scrofa OX=9823 GN=KRT18 PE=1 SV=1	tr|A0A5G2RBD3|A0A5G2RBD3_PIG	P05783	47 kDa	0.77	0.7
Nucleoside-triphosphatase, cancer-related OS=Sus scrofa OX=9823 GN=NTPCR PE=1 SV=1	tr|A0A5G2RC86|A0A5G2RC86_PIG (+1)	Q9BSD7	19 kDa	0.77	0.7
Arm_2 domain-containing protein OS=Sus scrofa OX=9823 GN=ARMC10 PE=1 SV=1	tr|A0A5G2RFH1|A0A5G2RFH1_PIG	Q8N2F6	34 kDa	0.77	0.6
Versican OS=Sus scrofa OX=9823 GN=VCAN PE=1 SV=3	tr|F1REZ2|F1REZ2_PIG	P13611	378 kDa	0.77	1.3
Argininosuccinate lyase isoform 1 OS=Sus scrofa OX=9823 GN=ASL PE=1 SV=1	tr|F1RJH8|F1RJH8_PIG	P04424	52 kDa	0.77	1.4
Vacuolar proton pump subunit B OS=Sus scrofa OX=9823 GN=ATP6V1B2 PE=3 SV=2	tr|F1RMZ8|F1RMZ8_PIG	P21281	56 kDa	0.77	1.4
DnaJ homolog subfamily A member 1 isoform 1 OS=Sus scrofa OX=9823 GN=DNAJA1 PE=1 SV=1	tr|F1SE73|F1SE73_PIG	P31689	45 kDa	0.77	0.6
Non-specific serine/threonine protein kinase OS=Sus scrofa OX=9823 GN=PAK2 PE=1 SV=3	tr|F1SQW0|F1SQW0_PIG	Q13177	58 kDa	0.77	1.3
Uncharacterized protein OS=Sus scrofa OX=9823 GN=RBM12 PE=1 SV=1	tr|I3LUZ1|I3LUZ1_PIG		124 kDa	0.77	1.2
Glutamine--tRNA ligase OS=Sus scrofa OX=9823 GN=QARS1 PE=2 SV=1	tr|M3TYW5|M3TYW5_PIG	P47897	88 kDa	0.77	0.8
Serotransferrin OS=Sus scrofa OX=9823 GN=TF PE=1 SV=2	sp|P09571|TRFE_PIG	P02787	77 kDa	0.78	1.1
Mannose-1-phosphate guanyltransferase beta OS=Sus scrofa OX=9823 GN=GMPPB PE=1 SV=1	sp|P0C5I2|GMPPB_PIG	Q9Y5P6	40 kDa	0.78	1.5
Serine/threonine-protein phosphatase 2A catalytic subunit alpha isoform OS=Sus scrofa OX=9823 GN=PPP2CA PE=2 SV=1	sp|P67776|PP2AA_PIG	P67775	36 kDa	0.78	1.1
Trifunctional enzyme subunit alpha, mitochondrial OS=Sus scrofa OX=9823 GN=HADHA PE=2 SV=1	sp|Q29554|ECHA_PIG	P40939	83 kDa	0.78	1.1
Tripartite motif-containing protein 54 isoform X1 OS=Sus scrofa OX=9823 GN=TRIM54 PE=4 SV=1	tr|A0A286ZKH6|A0A286ZKH6_PIG	Q9BYV2	41 kDa	0.78	0.8
Coronin OS=Sus scrofa OX=9823 GN=CORO1A PE=3 SV=2	tr|A0A286ZUJ1|A0A286ZUJ1_PIG	P31146	54 kDa	0.78	0.8
PKS_ER domain-containing protein OS=Sus scrofa OX=9823 GN=ADH1C PE=1 SV=1	tr|A0A287A703|A0A287A703_PIG (+1)	P00326	40 kDa	0.78	0.8
Complement C8 gamma chain OS=Sus scrofa OX=9823 GN=C8G PE=1 SV=2	tr|A0A287AFQ4|A0A287AFQ4_PIG	P07360	28 kDa	0.78	1.5
AFP-like domain-containing protein OS=Sus scrofa OX=9823 GN=ANP32B PE=1 SV=1	tr|A0A287AFR6|A0A287AFR6_PIG	Not present in human	39 kDa	0.78	1.5
Ferritin OS=Sus scrofa OX=9823 GN=FTH1 PE=1 SV=2	tr|A0A287AL10|A0A287AL10_PIG	P02794	21 kDa	0.78	0.8
PC4 domain-containing protein OS=Sus scrofa OX=9823 GN=SUB1 PE=1 SV=1	tr|A0A287AUW4|A0A287AUW4_PIG	Not present in human	14 kDa	0.78	1.5
Elastin microfibril interfacer 1 OS=Sus scrofa OX=9823 GN=EMILIN1 PE=1 SV=1	tr|A0A5G2QCU4|A0A5G2QCU4_PIG	Q8N6H7	135 kDa	0.78	0.9
Basal cell adhesion molecule (Lutheran blood group) OS=Sus scrofa OX=9823 GN=BCAM PE=1 SV=1	tr|A0A5G2QRV6|A0A5G2QRV6_PIG	P50895	67 kDa	0.78	0.9
Carn_acyltransf domain-containing protein OS=Sus scrofa OX=9823 GN=CPT2 PE=1 SV=1	tr|A0A5G2R8A9|A0A5G2R8A9_PIG	P23786	74 kDa	0.78	1.1
Uncharacterized protein OS=Sus scrofa OX=9823 GN=MYH9 PE=1 SV=1	tr|A0A5G2R8R0|A0A5G2R8R0_PIG		24 kDa	0.78	1.1
DnaJ heat shock protein family (Hsp40) member A2 OS=Sus scrofa OX=9823 GN=DNAJA2 PE=1 SV=1	tr|F1RP05|F1RP05_PIG	O60884	46 kDa	0.78	0.9
Uncharacterized protein OS=Sus scrofa OX=9823 GN=CCT6A PE=1 SV=2	tr|I3L9J4|I3L9J4_PIG		58 kDa	0.78	1.1
Uncharacterized protein OS=Sus scrofa OX=9823 GN=TNNT2 PE=1 SV=3	tr|I3LS66|I3LS66_PIG		35 kDa	0.78	1
Vimentin OS=Sus scrofa OX=9823 GN=VIM PE=1 SV=2	sp|P02543|VIME_PIG	P08670	54 kDa	0.79	0.9
Plasminogen OS=Sus scrofa OX=9823 GN=PLG PE=1 SV=3	sp|P06867|PLMN_PIG	P00747	91 kDa	0.79	1.1
Calponin-1 OS=Sus scrofa OX=9823 GN=CNN1 PE=2 SV=1	sp|Q08092|CNN1_PIG	P51911	33 kDa	0.79	1.2
Caveolin-2 OS=Sus scrofa OX=9823 GN=CAV2 PE=3 SV=1	sp|Q2QLE2|CAV2_PIG	P51636	18 kDa	0.79	1.5
Heat shock protein family B (small) member 8 OS=Sus scrofa OX=9823 GN=HSPB8 PE=3 SV=2	tr|A0A286ZID4|A0A286ZID4_PIG	Q9UJY1	22 kDa	0.79	0.7
Histone cluster 1 H1 family member e OS=Sus scrofa OX=9823 GN=HIST1H1E PE=3 SV=2	tr|A0A286ZZB7|A0A286ZZB7_PIG	P10412	21 kDa	0.79	1.1
Single stranded DNA binding protein 1 OS=Sus scrofa OX=9823 GN=SSBP1 PE=1 SV=1	tr|A0A287A6V6|A0A287A6V6_PIG	Q04837	17 kDa	0.79	0.8
Heterogeneous nuclear ribonucleoproteins C1/C2 isoform X2 OS=Sus scrofa OX=9823 GN=HNRNPC PE=1 SV=2	tr|A0A287AA79|A0A287AA79_PIG	P07910	32 kDa	0.79	1.1
Myosin light chain kinase 3 OS=Sus scrofa OX=9823 GN=MYLK3 PE=4 SV=2	tr|A0A287B960|A0A287B960_PIG	Q32MK0	87 kDa	0.79	0.7
RNA binding protein, mRNA processing factor OS=Sus scrofa OX=9823 GN=RBPMS PE=1 SV=1	tr|A0A287BLU9|A0A287BLU9_PIG (+3)	Q6ZRY4	24 kDa	0.79	1.4
Glutathione reductase OS=Sus scrofa OX=9823 GN=GSR PE=1 SV=1	tr|A0A5G2QCB4|A0A5G2QCB4_PIG (+1)	P00390	56 kDa	0.79	0.9
Elongation factor Ts, mitochondrial OS=Sus scrofa OX=9823 GN=TSFM PE=1 SV=1	tr|A0A5G2QFS9|A0A5G2QFS9_PIG	P43897	42 kDa	0.79	0.9
Calcium/calmodulin dependent protein kinase II beta OS=Sus scrofa OX=9823 GN=CAMK2B PE=1 SV=1	tr|A0A5G2QQK7|A0A5G2QQK7_PIG	Q13554	69 kDa	0.79	1.1
Extended synaptotagmin 1 OS=Sus scrofa OX=9823 GN=ESYT1 PE=1 SV=1	tr|A0A5G2R0L8|A0A5G2R0L8_PIG	Q9BSJ8	124 kDa	0.79	0.8
Uncharacterized protein OS=Sus scrofa OX=9823 GN=HK1 PE=1 SV=4	tr|F1SUF2|F1SUF2_PIG		103 kDa	0.79	1.1
Uncharacterized protein OS=Sus scrofa OX=9823 GN=CYP27A1 PE=3 SV=3	tr|I3LAB7|I3LAB7_PIG		65 kDa	0.79	1.1
Hydroxysteroid 17-beta dehydrogenase 12 OS=Sus scrofa OX=9823 GN=HSD17B12 PE=1 SV=2	tr|I3LJY8|I3LJY8_PIG	Q53GQ0	34 kDa	0.79	0.8
Blood vessel epicardial substance OS=Sus scrofa OX=9823 GN=BVES PE=2 SV=1	sp|B8Q0B2|POPD1_PIG (+1)	Q8NE79	41 kDa	0.8	0.8
Calreticulin OS=Sus scrofa OX=9823 GN=CALR PE=1 SV=3	sp|P28491|CALR_PIG	P27797	48 kDa	0.8	0.9
5'-AMP-activated protein kinase subunit gamma-1 OS=Sus scrofa OX=9823 GN=PRKAG1 PE=1 SV=2	sp|Q09138|AAKG1_PIG (+1)	P54619	37 kDa	0.8	1.5
Amine oxidase OS=Sus scrofa OX=9823 GN=LOC100520329 PE=1 SV=2	tr|A0A286ZI83|A0A286ZI83_PIG (+1)	P21397	80 kDa	0.8	0.7
Sad1 and UNC84 domain containing 2 OS=Sus scrofa OX=9823 GN=SUN2 PE=1 SV=2	tr|A0A286ZN31|A0A286ZN31_PIG (+1)	Q9UH99	78 kDa	0.8	1.1
Glutathione synthetase OS=Sus scrofa OX=9823 GN=GSS PE=1 SV=1	tr|A0A286ZRS0|A0A286ZRS0_PIG	P48637	52 kDa	0.8	0.7
Spectrin beta chain OS=Sus scrofa OX=9823 GN=SPTB PE=1 SV=1	tr|A0A287A113|A0A287A113_PIG	P11277	270 kDa	0.8	1.1
Lamin B2 OS=Sus scrofa OX=9823 GN=LMNB2 PE=1 SV=1	tr|A0A287ADV8|A0A287ADV8_PIG	Q03252	82 kDa	0.8	1.2
Nebulette OS=Sus scrofa OX=9823 GN=NEBL PE=1 SV=2	tr|A0A287AHR6|A0A287AHR6_PIG	O76041	116 kDa	0.8	1.1
NADH dehydrogenase [ubiquinone] iron-sulfur protein 4, mitochondrial OS=Sus scrofa OX=9823 GN=NDUFS4 PE=1 SV=1	tr|A0A287AMN2|A0A287AMN2_PIG	O43181	20 kDa	0.8	1.1
6-phosphogluconolactonase OS=Sus scrofa OX=9823 GN=PGLS PE=1 SV=1	tr|A0A287APK0|A0A287APK0_PIG	O95336	23 kDa	0.8	0.7
Uncharacterized protein OS=Sus scrofa OX=9823 GN=ARHGDIB PE=1 SV=1	tr|A0A287B0I3|A0A287B0I3_PIG		23 kDa	0.8	0.8
Non-POU domain containing octamer binding OS=Sus scrofa OX=9823 GN=NONO PE=1 SV=1	tr|A0A287B3Y2|A0A287B3Y2_PIG	Q15233	55 kDa	0.8	1.1
Multifunctional methyltransferase subunit TRM112-like protein isoform X1 OS=Sus scrofa OX=9823 GN=TRMT112 PE=1 SV=1	tr|A0A287B938|A0A287B938_PIG (+1)	Q9UI30	18 kDa	0.8	0.7
Methylenetetrahydrofolate dehydrogenase, cyclohydrolase and formyltetrahydrofolate synthetase 1 OS=Sus scrofa OX=9823 GN=MTHFD1 PE=1 SV=1	tr|A0A5G2QGL1|A0A5G2QGL1_PIG (+1)	P11586	99 kDa	0.8	0.8
Serotransferrin OS=Sus scrofa OX=9823 GN=TF PE=3 SV=1	tr|A0A5G2RAY1|A0A5G2RAY1_PIG	P02787	78 kDa	0.8	1.1
Mannose receptor C type 2 OS=Sus scrofa OX=9823 GN=MRC2 PE=4 SV=4	tr|F1RRU7|F1RRU7_PIG	Q9UBG0	143 kDa	0.8	1.5
B-cell receptor-associated protein OS=Sus scrofa OX=9823 GN=BCAP31 PE=1 SV=2	tr|F1S2A8|F1S2A8_PIG	Q15185	28 kDa	0.8	1.5
NLR family member X1 OS=Sus scrofa OX=9823 GN=NLRX1 PE=1 SV=1	tr|F1SAH1|F1SAH1_PIG	Q86UT6	108 kDa	0.8	1.2
Uncharacterized protein OS=Sus scrofa OX=9823 GN=DNAJA4 PE=1 SV=1	tr|F6PUU1|F6PUU1_PIG		63 kDa	0.8	0.9
Uncharacterized protein OS=Sus scrofa OX=9823 GN=TNXB PE=1 SV=2	tr|K7GRK7|K7GRK7_PIG		447 kDa	0.8	1.1
Aminoacylase-1 OS=Sus scrofa OX=9823 GN=ACY1 PE=1 SV=2	sp|P37111|ACY1_PIG	Q03154	45 kDa	0.81	1.1
Fructose-bisphosphate aldolase OS=Sus scrofa OX=9823 GN=ALDOA PE=3 SV=2	tr|A0A286ZYX8|A0A286ZYX8_PIG	P04075	40 kDa	0.81	1.1
Elongation factor Tu GTP binding domain containing 2 OS=Sus scrofa OX=9823 GN=EFTUD2 PE=1 SV=2	tr|A0A287A5P3|A0A287A5P3_PIG (+1)	Q15029	105 kDa	0.81	0.8
Ig-like domain-containing protein OS=Sus scrofa OX=9823 GN=SLA-2 PE=1 SV=1	tr|A0A287AQG3|A0A287AQG3_PIG	Not present in human	40 kDa	0.81	1.1
COP9 signalosome subunit 3 OS=Sus scrofa OX=9823 GN=COPS3 PE=1 SV=2	tr|A0A287AZA3|A0A287AZA3_PIG	Q9UNS2	44 kDa	0.81	1.1
Hypoxia up-regulated 1 OS=Sus scrofa OX=9823 GN=HYOU1 PE=1 SV=1	tr|A0A287BGS6|A0A287BGS6_PIG	Q9Y4L1	109 kDa	0.81	0.9
Succinate--CoA ligase [ADP/GDP-forming] subunit alpha, mitochondrial OS=Sus scrofa OX=9823 GN=SUCLG1 PE=3 SV=1	tr|A0A5G2QKE5|A0A5G2QKE5_PIG	P53597	41 kDa	0.81	0.9
Melanoma cell adhesion molecule OS=Sus scrofa OX=9823 GN=MCAM PE=1 SV=1	tr|A0A5G2R5Z3|A0A5G2R5Z3_PIG	P43121	74 kDa	0.81	1.1
Pyruvate dehydrogenase E1 component subunit alpha OS=Sus scrofa OX=9823 GN=PDHA1 PE=1 SV=1	tr|A0A5K1VBH1|A0A5K1VBH1_PIG	P08559	44 kDa	0.81	0.9
Myomesin 1 OS=Sus scrofa OX=9823 GN=MYOM1 PE=1 SV=1	tr|A0A5K1VE56|A0A5K1VE56_PIG	P52179	175 kDa	0.81	1.1
Cysteine desulfurase, mitochondrial OS=Sus scrofa OX=9823 GN=NFS1 PE=1 SV=1	tr|B6UV57|B6UV57_PIG	Q9Y697	50 kDa	0.81	1.3
RAS related OS=Sus scrofa OX=9823 GN=RRAS PE=1 SV=1	tr|F1RHW4|F1RHW4_PIG	P62070	24 kDa	0.81	1.1
Apoptosis inducing factor mitochondria associated 1 OS=Sus scrofa OX=9823 GN=AIFM1 PE=1 SV=1	tr|F1RTH3|F1RTH3_PIG	O95831	67 kDa	0.81	0.9
DEAD-box helicase 1 OS=Sus scrofa OX=9823 GN=DDX1 PE=1 SV=4	tr|F1SCS1|F1SCS1_PIG	Q92499	83 kDa	0.81	0.9
Peripherin OS=Sus scrofa OX=9823 GN=PRPH PE=1 SV=3	tr|F1SHC0|F1SHC0_PIG	P41219	54 kDa	0.81	1.3
Lon protease homolog, mitochondrial OS=Sus scrofa OX=9823 GN=LONP1 PE=1 SV=2	tr|I3L7T4|I3L7T4_PIG	P36776	107 kDa	0.81	1.1
Acylamino-acid-releasing enzyme OS=Sus scrofa OX=9823 GN=APEH PE=4 SV=2	tr|I3LFX8|I3LFX8_PIG	P13798	84 kDa	0.81	1.1
Nucleophosmin OS=Sus scrofa OX=9823 GN=NPM1 PE=1 SV=2	tr|I3LUP6|I3LUP6_PIG	P06748	33 kDa	0.81	1.1
Uncharacterized protein OS=Sus scrofa OX=9823 GN=ATP5F1E PE=1 SV=1	tr|K7GS22|K7GS22_PIG		15 kDa	0.81	1.4
Ubiquitin-fold modifier 1 OS=Sus scrofa OX=9823 GN=UFM1 PE=1 SV=1	tr|M3UZ42|M3UZ42_PIG	P61960	9 kDa	0.81	0.9
Myosin light chain 4 OS=Sus scrofa OX=9823 GN=MYL4 PE=1 SV=3	sp|F1RRT2|MYL4_PIG	O95394	22 kDa	0.82	0.9
Malate dehydrogenase, cytoplasmic OS=Sus scrofa OX=9823 GN=MDH1 PE=1 SV=4	sp|P11708|MDHC_PIG	P40925	36 kDa	0.82	1.1
Caveolin-1 OS=Sus scrofa OX=9823 GN=CAV1 PE=2 SV=1	sp|Q6RVA9|CAV1_PIG (+1)	Q03135	21 kDa	0.82	1
Heat shock protein 90 alpha family class B member 1 OS=Sus scrofa OX=9823 GN=HSP90AB1 PE=1 SV=1	tr|A0A286ZKC5|A0A286ZKC5_PIG	P08238	95 kDa	0.82	1.1
Hedgehog acyltransferase like OS=Sus scrofa OX=9823 GN=HHATL PE=1 SV=1	tr|A0A287A0H7|A0A287A0H7_PIG (+1)	Q9HCP6	60 kDa	0.82	0.9
UV excision repair protein RAD23 OS=Sus scrofa OX=9823 GN=RAD23A PE=1 SV=1	tr|A0A287ARC6|A0A287ARC6_PIG	P54725	46 kDa	0.82	0.9
Dynamin 2 OS=Sus scrofa OX=9823 GN=DNM2 PE=3 SV=2	tr|A0A287B8X7|A0A287B8X7_PIG	P50570	99 kDa	0.82	0.8
Eukaryotic translation elongation factor 1 delta OS=Sus scrofa OX=9823 GN=EEF1D PE=1 SV=2	tr|A0A287BF97|A0A287BF97_PIG	P29692	75 kDa	0.82	1.1
Glutaredoxin 3 OS=Sus scrofa OX=9823 GN=GLRX3 PE=1 SV=1	tr|A0A480M761|A0A480M761_PIG (+2)	O76003	37 kDa	0.82	1.1
26S proteasome non-ATPase regulatory subunit 5 isoform 1 OS=Sus scrofa OX=9823 GN=PSMD5 PE=1 SV=1	tr|A0A480QIP5|A0A480QIP5_PIG	Q16401	56 kDa	0.82	1.1
SAP domain-containing ribonucleoprotein OS=Sus scrofa OX=9823 GN=SARNP PE=1 SV=1	tr|A0A480SMR3|A0A480SMR3_PIG	P82979	24 kDa	0.82	1.1
Programmed cell death 5 OS=Sus scrofa OX=9823 GN=PDCD5 PE=1 SV=1	tr|A0A5G2QWP1|A0A5G2QWP1_PIG	O14737	14 kDa	0.82	1.1
Acyl-CoA dehydrogenase very long chain OS=Sus scrofa OX=9823 GN=ACADVL PE=1 SV=1	tr|A0A5G2R3E4|A0A5G2R3E4_PIG	P49748	73 kDa	0.82	1.1
Aspartyl aminopeptidase OS=Sus scrofa OX=9823 GN=DNPEP PE=1 SV=1	tr|A0A5G2R9H6|A0A5G2R9H6_PIG	Q9ULA0	56 kDa	0.82	0.9
Cytidine/uridine monophosphate kinase 2 OS=Sus scrofa OX=9823 GN=CMPK2 PE=1 SV=1	tr|A0A5G2RG89|A0A5G2RG89_PIG	Q5EBM0	49 kDa	0.82	0.7
Lymphocyte cytosolic protein 1 OS=Sus scrofa OX=9823 GN=LCP1 PE=4 SV=4	tr|F1RK02|F1RK02_PIG	P13796	72 kDa	0.82	1.1
Pyridoxal phosphate homeostasis protein OS=Sus scrofa OX=9823 GN=PLPBP PE=1 SV=1	tr|F1RX84|F1RX84_PIG	O94903	30 kDa	0.82	1.1
Haloacid dehalogenase like hydrolase domain containing 2 OS=Sus scrofa OX=9823 GN=HDHD2 PE=4 SV=1	tr|F1RZX9|F1RZX9_PIG	Q9H0R4	28 kDa	0.82	0.9
26S protease regulatory subunit 4 OS=Sus scrofa OX=9823 GN=PSMC1 PE=1 SV=1	tr|F2Z5J1|F2Z5J1_PIG	P62191	49 kDa	0.82	1.1
Acylphosphatase OS=Sus scrofa OX=9823 GN=ACYP1 PE=3 SV=1	tr|J9JIK5|J9JIK5_PIG	P07311	16 kDa	0.82	1.2
Spermine synthase OS=Sus scrofa OX=9823 GN=SMS PE=1 SV=3	tr|K7GPY8|K7GPY8_PIG	P52788	41 kDa	0.82	1.3
Dipeptidyl peptidase 4 OS=Sus scrofa OX=9823 GN=DPP4 PE=1 SV=3	sp|P22411|DPP4_PIG (+1)	P27487	88 kDa	0.83	0.7
ATP synthase subunit O, mitochondrial OS=Sus scrofa OX=9823 GN=ATP5PO PE=1 SV=1	sp|Q2EN81|ATPO_PIG (+1)	P48047	23 kDa	0.83	1.1
Cofilin-2 OS=Sus scrofa OX=9823 GN=CFL2 PE=2 SV=4	sp|Q5G6V9|COF2_PIG	Q9Y281	19 kDa	0.83	0.9
Ragulator complex protein LAMTOR5 OS=Sus scrofa OX=9823 GN=LAMTOR5 PE=3 SV=2	sp|Q66X52|LTOR5_PIG	O43504	10 kDa	0.83	1.2
ATP-dependent 6-phosphofructokinase OS=Sus scrofa OX=9823 GN=PFKM PE=1 SV=1	tr|A0A286ZIJ9|A0A286ZIJ9_PIG	P17858	89 kDa	0.83	1.1
Collagen type XVIII alpha 1 chain OS=Sus scrofa OX=9823 GN=COL18A1 PE=1 SV=2	tr|A0A286ZIL9|A0A286ZIL9_PIG	P39060	179 kDa	0.83	1
Solute carrier family 25 member 12 OS=Sus scrofa OX=9823 GN=SLC25A12 PE=1 SV=1	tr|A0A286ZQ07|A0A286ZQ07_PIG	O75746	75 kDa	0.83	1.1
Enoyl-CoA hydratase and 3-hydroxyacyl CoA dehydrogenase OS=Sus scrofa OX=9823 GN=EHHADH PE=4 SV=2	tr|A0A287ACP9|A0A287ACP9_PIG	Q08426	74 kDa	0.83	0.7
SERPIN domain-containing protein OS=Sus scrofa OX=9823 GN=SERPINA3-2 PE=1 SV=1	tr|A0A287AT48|A0A287AT48_PIG	Not present in human	47 kDa	0.83	1.1
Apoptosis inhibitor 5 OS=Sus scrofa OX=9823 GN=API5 PE=4 SV=2	tr|A0A287BHM4|A0A287BHM4_PIG	Q9BZZ5	57 kDa	0.83	0.7
RAB7A, member RAS oncogene family OS=Sus scrofa OX=9823 GN=RAB7A PE=1 SV=1	tr|A0A480T5S7|A0A480T5S7_PIG	P51149	24 kDa	0.83	1.1
Mitochondrial-processing peptidase subunit beta OS=Sus scrofa OX=9823 GN=PMPCB PE=1 SV=1	tr|A0A480T8S4|A0A480T8S4_PIG (+1)	O75439	54 kDa	0.83	1.1
Fructosamine 3 kinase OS=Sus scrofa OX=9823 GN=FN3K PE=1 SV=4	tr|F1S006|F1S006_PIG	Q9H479	53 kDa	0.83	1.2
CDGSH iron sulfur domain 2 OS=Sus scrofa OX=9823 GN=CISD2 PE=1 SV=2	tr|F1S108|F1S108_PIG	Q8N5K1	15 kDa	0.83	1.3
Uncharacterized protein OS=Sus scrofa OX=9823 GN=PPP1R7 PE=1 SV=2	tr|F1SI09|F1SI09_PIG		41 kDa	0.83	0.9
Eukaryotic translation initiation factor 2 subunit 3 OS=Sus scrofa OX=9823 GN=EIF2S3 PE=4 SV=1	tr|I3LUM9|I3LUM9_PIG	P41091	51 kDa	0.83	0.8
Collagen type VI alpha 3 chain OS=Sus scrofa OX=9823 GN=COL6A3 PE=1 SV=2	tr|I3LUR7|I3LUR7_PIG	P12111	318 kDa	0.83	1.1
Serine/threonine-protein phosphatase OS=Sus scrofa OX=9823 GN=PPP1CA PE=1 SV=1	tr|Q2EHH8|Q2EHH8_PIG	P62136	38 kDa	0.83	0.9
Microsomal glutathione S-transferase 3 OS=Sus scrofa OX=9823 GN=MGST3 PE=1 SV=1	tr|Q2EN77|Q2EN77_PIG	O14880	17 kDa	0.83	0.9
Apolipoprotein A-IV OS=Sus scrofa OX=9823 GN=APOA4 PE=2 SV=1	sp|O46409|APOA4_PIG	P02652	43 kDa	0.84	0.8
High mobility group protein B2 OS=Sus scrofa OX=9823 GN=HMGB2 PE=1 SV=2	sp|P17741|HMGB2_PIG	P26583	24 kDa	0.84	1.3
Cytochrome c OS=Sus scrofa OX=9823 GN=CYCS PE=1 SV=2	sp|P62895|CYC_PIG	p99999	12 kDa	0.84	0.9
Methylmalonyl-CoA mutase, mitochondrial OS=Sus scrofa OX=9823 GN=MMUT PE=2 SV=2	sp|Q8MI68|MUTA_PIG	P22033	83 kDa	0.84	1.1
Proteasome 26S subunit, ATPase 6 OS=Sus scrofa OX=9823 GN=PSMC6 PE=1 SV=2	tr|A0A286ZXG4|A0A286ZXG4_PIG	P62333	46 kDa	0.84	0.9
Drebrin like OS=Sus scrofa OX=9823 GN=DBNL PE=1 SV=1	tr|A0A287ADG1|A0A287ADG1_PIG	Q9UJU6	43 kDa	0.84	1
Heterogeneous nuclear ribonucleoprotein L OS=Sus scrofa OX=9823 GN=HNRNPL PE=4 SV=2	tr|A0A287AJX7|A0A287AJX7_PIG	P14866	50 kDa	0.84	0.9
Keratin, type II cytoskeletal 8 isoform 2 OS=Sus scrofa OX=9823 GN=KRT8 PE=1 SV=1	tr|A0A287ARG4|A0A287ARG4_PIG	P05787	52 kDa	0.84	0.9
Cytochrome c1 OS=Sus scrofa OX=9823 GN=CYC1 PE=1 SV=1	tr|A0A287AZF9|A0A287AZF9_PIG	P08574	35 kDa	0.84	1
Nucleolar protein 3 OS=Sus scrofa OX=9823 GN=NOL3 PE=1 SV=1	tr|A0A287B0N7|A0A287B0N7_PIG (+1)	O60936	26 kDa	0.84	0.9
NDRG family member 4 OS=Sus scrofa OX=9823 GN=NDRG4 PE=1 SV=2	tr|A0A287BRH1|A0A287BRH1_PIG (+1)	Q9ULP0	43 kDa	0.84	1.1
MAP7 domain containing 1 OS=Sus scrofa OX=9823 GN=MAP7D1 PE=1 SV=1	tr|A0A5G2QFD5|A0A5G2QFD5_PIG (+1)	Q3KQU3	90 kDa	0.84	0.7
Nudix hydrolase domain-containing protein OS=Sus scrofa OX=9823 GN=RPS10 PE=1 SV=1	tr|A0A5G2QG45|A0A5G2QG45_PIG	P46783	33 kDa	0.84	1.1
CD93 molecule OS=Sus scrofa OX=9823 GN=CD93 PE=1 SV=1	tr|A0A5G2QP56|A0A5G2QP56_PIG (+1)	Q9NPY3	65 kDa	0.84	0.7
Ubiquinol-cytochrome c reductase core protein 2 OS=Sus scrofa OX=9823 GN=UQCRC2 PE=1 SV=1	tr|A0A5G2REY8|A0A5G2REY8_PIG	P22695	47 kDa	0.84	0.9
GTP-binding nuclear protein Ran OS=Sus scrofa OX=9823 GN=RAN PE=1 SV=2	tr|F1RFQ7|F1RFQ7_PIG	P62826	24 kDa	0.84	1.1
Serine/threonine-protein phosphatase OS=Sus scrofa OX=9823 GN=PPP5C PE=1 SV=3	tr|F1RM25|F1RM25_PIG	P53041	57 kDa	0.84	1.3
Lupus La protein OS=Sus scrofa OX=9823 GN=SSB PE=1 SV=3	tr|F1S1V1|F1S1V1_PIG	P05455	47 kDa	0.84	0.8
Glutamate dehydrogenase 1, mitochondrial OS=Sus scrofa OX=9823 GN=GLUD1 PE=1 SV=1	tr|F1SEN2|F1SEN2_PIG	P00367	61 kDa	0.84	0.9
Cullin associated and neddylation dissociated 2 (putative) OS=Sus scrofa OX=9823 GN=CAND2 PE=1 SV=1	tr|F1SQ89|F1SQ89_PIG	O75155	135 kDa	0.84	1.1
NADH dehydrogenase [ubiquinone] 1 alpha subcomplex subunit 12 OS=Sus scrofa OX=9823 GN=NDUFA12 PE=1 SV=2	tr|F1SQP4|F1SQP4_PIG	Q9UI09	17 kDa	0.84	1.1
Eukaryotic translation elongation factor 2 OS=Sus scrofa OX=9823 GN=EEF2 PE=1 SV=3	tr|I3LII3|I3LII3_PIG	P13639	96 kDa	0.84	1.1
TatD DNase domain containing 1 OS=Sus scrofa OX=9823 GN=TATDN1 PE=4 SV=2	tr|K7GLH4|K7GLH4_PIG	Q6P1N9	38 kDa	0.84	1.2
ATP synthase subunit beta OS=Sus scrofa OX=9823 GN=ATP5F1B PE=1 SV=2	tr|K7GLT8|K7GLT8_PIG	P06576	61 kDa	0.84	1.1
Calcium/calmodulin dependent protein kinase II gamma OS=Sus scrofa OX=9823 GN=CAMK2G PE=1 SV=2	tr|A0A286ZKT1|A0A286ZKT1_PIG	Q13555	64 kDa	0.85	1.2
Glycerol-3-phosphate dehydrogenase OS=Sus scrofa OX=9823 GN=GPD2 PE=1 SV=1	tr|A0A286ZKW5|A0A286ZKW5_PIG (+1)	P43304	81 kDa	0.85	1.3
Retinol dehydrogenase 13 OS=Sus scrofa OX=9823 GN=RDH13 PE=3 SV=1	tr|A0A286ZWN9|A0A286ZWN9_PIG	Q8NBN7	36 kDa	0.85	1.1
Fructose-bisphosphate aldolase OS=Sus scrofa OX=9823 GN=ALDOA PE=3 SV=2	tr|A0A287A1V5|A0A287A1V5_PIG	P04075	55 kDa	0.85	1.1
ZnF_CDGSH domain-containing protein OS=Sus scrofa OX=9823 GN=CISD1 PE=4 SV=1	tr|A0A287ABR3|A0A287ABR3_PIG	Q9NZ45	13 kDa	0.85	1.1
Multifunctional fusion protein OS=Sus scrofa OX=9823 GN=PKM PE=1 SV=1	tr|A0A287B7L9|A0A287B7L9_PIG	A0A024RDP8	122 kDa	0.85	0.9
NADH:ubiquinone oxidoreductase subunit B11 OS=Sus scrofa OX=9823 GN=NDUFB11 PE=1 SV=2	tr|A0A287BMW6|A0A287BMW6_PIG	Q9NX14	18 kDa	0.85	1.1
Proteasome subunit beta OS=Sus scrofa OX=9823 GN=PSMB1 PE=1 SV=1	tr|A0A287BPP9|A0A287BPP9_PIG	P20618	26 kDa	0.85	0.9
Alpha-2-macroglobulin OS=Sus scrofa OX=9823 GN=A2M PE=1 SV=1	tr|A0A5G2Q8I9|A0A5G2Q8I9_PIG (+1)	P01023	164 kDa	0.85	1.1
Uncharacterized protein OS=Sus scrofa OX=9823 GN=C4A PE=1 SV=1	tr|A0A5G2QCL1|A0A5G2QCL1_PIG		194 kDa	0.85	1.1
COP9 signalosome subunit 7A OS=Sus scrofa OX=9823 GN=COPS7A PE=1 SV=1	tr|A0A5G2QJQ6|A0A5G2QJQ6_PIG	Q9UBW8	30 kDa	0.85	1.1
NEDD8-activating enzyme E1 regulatory subunit OS=Sus scrofa OX=9823 GN=TERB1 PE=1 SV=1	tr|A0A5G2QN12|A0A5G2QN12_PIG (+1)	Q8TBC4	58 kDa	0.85	1.2
Prostaglandin E synthase 3 OS=Sus scrofa OX=9823 GN=PTGES3 PE=1 SV=1	tr|A0A5G2QTM2|A0A5G2QTM2_PIG (+1)	Q15185	16 kDa	0.85	0.8
Peptidylprolyl isomerase OS=Sus scrofa OX=9823 GN=FKBP4 PE=1 SV=1	tr|A0A5G2QVN7|A0A5G2QVN7_PIG	Q02790	51 kDa	0.85	1.2
Elongation factor Tu OS=Sus scrofa OX=9823 GN=TUFM PE=1 SV=2	tr|F1RFI1|F1RFI1_PIG	P49411	61 kDa	0.85	1.1
Branched-chain-amino-acid aminotransferase, mitochondrial OS=Sus scrofa OX=9823 GN=BCAT2 PE=1 SV=3	tr|F1RL81|F1RL81_PIG	O15382	54 kDa	0.85	1
Tetratricopeptide repeat domain 38 OS=Sus scrofa OX=9823 GN=TTC38 PE=4 SV=2	tr|F1SM81|F1SM81_PIG	Q5R3I4	53 kDa	0.85	0.8
CDV3 homolog OS=Sus scrofa OX=9823 GN=CDV3 PE=1 SV=2	tr|I3LUE6|I3LUE6_PIG	Q9UKY7	28 kDa	0.85	0.9
Major prion protein OS=Sus scrofa OX=9823 GN=PRNP PE=1 SV=1	sp|P49927|PRIO_PIG (+1)	P04156	28 kDa	0.86	1.2
40S ribosomal protein S21 OS=Sus scrofa OX=9823 GN=RPS21 PE=1 SV=1	sp|P63221|RS21_PIG	P63220	9 kDa	0.86	0.9
Uncharacterized protein OS=Sus scrofa OX=9823 GN=MYOM2 PE=1 SV=1	tr|A0A286ZK06|A0A286ZK06_PIG		99 kDa	0.86	1.1
Deoxythymidylate kinase OS=Sus scrofa OX=9823 GN=DTYMK PE=3 SV=2	tr|A0A286ZYH6|A0A286ZYH6_PIG (+1)	P23919	24 kDa	0.86	0.9
Eukaryotic translation initiation factor 2 subunit 1 OS=Sus scrofa OX=9823 GN=EIF2S1 PE=1 SV=1	tr|A0A287A096|A0A287A096_PIG	P05198	36 kDa	0.86	1.1
Short chain dehydrogenase/reductase family 39U member 1 OS=Sus scrofa OX=9823 GN=SDR39U1 PE=1 SV=1	tr|A0A287A9T9|A0A287A9T9_PIG	Q9NRG7	31 kDa	0.86	0.9
Ig-like domain-containing protein OS=Sus scrofa OX=9823 PE=4 SV=2	tr|A0A287AA42|A0A287AA42_PIG	Not present in human	15 kDa	0.86	1.1
Protein kinase C and casein kinase substrate in neurons 3 OS=Sus scrofa OX=9823 GN=PACSIN3 PE=1 SV=1	tr|A0A287AR93|A0A287AR93_PIG (+1)	Q9UKS6	49 kDa	0.86	1
Thioredoxin domain containing 5 OS=Sus scrofa OX=9823 GN=TXNDC5 PE=1 SV=2	tr|A0A287ARZ1|A0A287ARZ1_PIG	Q8NBS9	47 kDa	0.86	1.1
Ubiquitin-like domain-containing protein OS=Sus scrofa OX=9823 GN=RPS27A PE=1 SV=2	tr|A0A287AZA7|A0A287AZA7_PIG	P62979	23 kDa	0.86	1
TPD52 like 2 OS=Sus scrofa OX=9823 GN=TPD52L2 PE=1 SV=2	tr|A0A287B1X5|A0A287B1X5_PIG	O43399	23 kDa	0.86	0.9
Heterogeneous nuclear ribonucleoprotein K isoform c OS=Sus scrofa OX=9823 GN=HNRNPK PE=1 SV=2	tr|A0A287B646|A0A287B646_PIG	P61978	49 kDa	0.86	1
Solute carrier family 8 member A1 OS=Sus scrofa OX=9823 GN=SLC8A1 PE=3 SV=2	tr|A0A287BMZ2|A0A287BMZ2_PIG	P32418	108 kDa	0.86	1.1
Pleckstrin homology domain containing A2 OS=Sus scrofa OX=9823 GN=PLEKHA2 PE=4 SV=1	tr|A0A287BNI0|A0A287BNI0_PIG	Q9HB19	47 kDa	0.86	0.8
Protein S100 OS=Sus scrofa OX=9823 GN=S100A11 PE=1 SV=1	tr|A0A5G2QQA2|A0A5G2QQA2_PIG	P31949	13 kDa	0.86	1.2
T-complex protein 1 subunit eta OS=Sus scrofa OX=9823 GN=CCT7 PE=1 SV=1	tr|D0G0C9|D0G0C9_PIG	Q99832	59 kDa	0.86	1
Ubiquinone biosynthesis protein COQ4 homolog, mitochondrial OS=Sus scrofa OX=9823 GN=COQ4 PE=3 SV=3	tr|F1RR97|F1RR97_PIG	Q9Y3A0	31 kDa	0.86	1.2
Peptidylprolyl isomerase D OS=Sus scrofa OX=9823 GN=PPID PE=4 SV=1	tr|F1RTY6|F1RTY6_PIG	Q08752	41 kDa	0.86	1.1
Protein transport protein SEC23 OS=Sus scrofa OX=9823 GN=SEC23A PE=1 SV=1	tr|F1SHL3|F1SHL3_PIG	Q15436	86 kDa	0.86	1.3
Lectin, mannose binding 1 OS=Sus scrofa OX=9823 GN=LMAN1 PE=1 SV=2	tr|F1SMS8|F1SMS8_PIG	P49257	58 kDa	0.86	0.8
Fascin OS=Sus scrofa OX=9823 GN=FSCN1 PE=1 SV=2	tr|I3LKF3|I3LKF3_PIG	Q16658	52 kDa	0.86	1
Protein phosphatase, Mg2+/Mn2+ dependent 1A OS=Sus scrofa OX=9823 GN=PPM1A PE=1 SV=1	tr|A0A286ZNX8|A0A286ZNX8_PIG (+2)	P35813	43 kDa	0.87	1.2
6-phosphogluconolactonase OS=Sus scrofa OX=9823 GN=PGLS PE=1 SV=2	tr|A0A286ZS31|A0A286ZS31_PIG	O95336	28 kDa	0.87	0.9
GTP-binding protein OS=Sus scrofa OX=9823 GN=RRAD PE=3 SV=1	tr|A0A286ZSB2|A0A286ZSB2_PIG	P55042	33 kDa	0.87	1.1
Gelsolin OS=Sus scrofa OX=9823 GN=GSN PE=4 SV=1	tr|A0A286ZSM7|A0A286ZSM7_PIG	P06396	82 kDa	0.87	1
Cytochrome b5 reductase 1 OS=Sus scrofa OX=9823 GN=CYB5R1 PE=1 SV=1	tr|A0A286ZXF1|A0A286ZXF1_PIG	Q9UHQ9	54 kDa	0.87	0.9
Ig-like domain-containing protein OS=Sus scrofa OX=9823 PE=4 SV=1	tr|A0A287A3T6|A0A287A3T6_PIG	Not present in human	17 kDa	0.87	0.8
LIM domain binding 3 OS=Sus scrofa OX=9823 GN=LDB3 PE=1 SV=1	tr|A0A287AM97|A0A287AM97_PIG	O75112	77 kDa	0.87	1
Uncharacterized protein OS=Sus scrofa OX=9823 GN=PPP1R2 PE=1 SV=1	tr|A0A287AX77|A0A287AX77_PIG (+2)		23 kDa	0.87	0.9
Leucine rich repeat containing 47 OS=Sus scrofa OX=9823 GN=LRRC47 PE=1 SV=1	tr|A0A287AYY7|A0A287AYY7_PIG	Q8N1G4	64 kDa	0.87	0.9
Spectrin beta chain OS=Sus scrofa OX=9823 GN=SPTBN1 PE=3 SV=1	tr|A0A287BDN2|A0A287BDN2_PIG	Q01082	273 kDa	0.87	1
Mitochondrial import receptor subunit TOM70 OS=Sus scrofa OX=9823 GN=TOMM70 PE=1 SV=1	tr|A0A480UKD4|A0A480UKD4_PIG	O94826	68 kDa	0.87	1
Nucleoside diphosphate kinase OS=Sus scrofa OX=9823 GN=NME2 PE=1 SV=1	tr|A0A5G2Q9S0|A0A5G2Q9S0_PIG	P22392	43 kDa	0.87	1
Purine rich element binding protein A OS=Sus scrofa OX=9823 GN=PURA PE=1 SV=1	tr|A0A5G2RGK0|A0A5G2RGK0_PIG	Q00577	51 kDa	0.87	1
ATP binding cassette subfamily B member 8 OS=Sus scrofa OX=9823 GN=ABCB8 PE=1 SV=1	tr|A0A5G2RHS3|A0A5G2RHS3_PIG	Q9NUT2	84 kDa	0.87	1.3
Fumarate hydratase, mitochondrial OS=Sus scrofa OX=9823 GN=FH PE=4 SV=1	tr|A0A5S8M9X9|A0A5S8M9X9_PIG	P07954	50 kDa	0.87	1
Uncharacterized protein OS=Sus scrofa OX=9823 GN=NUCB2 PE=1 SV=2	tr|F1S9A4|F1S9A4_PIG		56 kDa	0.87	0.9
ATP synthase subunit OS=Sus scrofa OX=9823 GN=ATP5MG PE=3 SV=2	tr|F1SAK7|F1SAK7_PIG	P00846	11 kDa	0.87	1
Adenylyl cyclase-associated protein OS=Sus scrofa OX=9823 GN=CAP1 PE=3 SV=3	tr|F1SMC0|F1SMC0_PIG	Q01518	51 kDa	0.87	1.1
Quinone oxidoreductase OS=Sus scrofa OX=9823 GN=CRYZ PE=2 SV=1	tr|Q19QT8|Q19QT8_PIG	Q08257	35 kDa	0.87	0.9
Spliceosome RNA helicase DDX39B OS=Sus scrofa OX=9823 GN=DDX39B PE=3 SV=2	sp|Q29024|DX39B_PIG	Q13838	49 kDa	0.88	1
Solute carrier family 25 member 4 OS=Sus scrofa OX=9823 GN=SLC25A4 PE=1 SV=1	tr|A0A286ZIE8|A0A286ZIE8_PIG	P12235	33 kDa	0.88	0.9
Complexin 1 OS=Sus scrofa OX=9823 GN=CPLX1 PE=1 SV=2	tr|A0A286ZKD8|A0A286ZKD8_PIG	O14810	13 kDa	0.88	1.2
Heterogeneous nuclear ribonucleoprotein D like OS=Sus scrofa OX=9823 GN=HNRNPDL PE=1 SV=2	tr|A0A286ZYE7|A0A286ZYE7_PIG	O14979	46 kDa	0.88	0.9
Splicing factor proline and glutamine rich OS=Sus scrofa OX=9823 GN=SFPQ PE=4 SV=1	tr|A0A287A4F2|A0A287A4F2_PIG	P23246	76 kDa	0.88	0.9
MICOS complex subunit OS=Sus scrofa OX=9823 GN=CHCHD3 PE=1 SV=1	tr|A0A287AC97|A0A287AC97_PIG	Q9NX63	27 kDa	0.88	1
Family with sequence similarity 192 member A OS=Sus scrofa OX=9823 GN=PSME3IP1 PE=4 SV=2	tr|A0A287AR42|A0A287AR42_PIG (+1)	Q9GZU8	29 kDa	0.88	0.9
FLII actin remodeling protein OS=Sus scrofa OX=9823 GN=FLII PE=4 SV=1	tr|A0A287AT54|A0A287AT54_PIG	Q13045	150 kDa	0.88	1.1
Plectin OS=Sus scrofa OX=9823 GN=PLEC PE=1 SV=1	tr|A0A287B9H1|A0A287B9H1_PIG	Q15149	608 kDa	0.88	0.9
Phenazine biosynthesis like protein domain containing OS=Sus scrofa OX=9823 GN=PBLD PE=1 SV=1	tr|A0A287BB10|A0A287BB10_PIG	P30039	31 kDa	0.88	0.9
Alanine aminotransferase 2 isoform 1 OS=Sus scrofa OX=9823 GN=GPT2 PE=1 SV=1	tr|A0A287BGP0|A0A287BGP0_PIG	Q8TD30	58 kDa	0.88	0.8
Autophagy-related protein 3 OS=Sus scrofa OX=9823 GN=ATG3 PE=1 SV=1	tr|A0A5G2QHY9|A0A5G2QHY9_PIG	Q9NT62	34 kDa	0.88	0.9
Histone H2A OS=Sus scrofa OX=9823 GN=H2A.Z PE=2 SV=1	tr|B1PEY3|B1PEY3_PIG	P0C0S5	14 kDa	0.88	1.1
RAN binding protein 1 OS=Sus scrofa OX=9823 GN=RANBP1 PE=1 SV=2	tr|F1RHM8|F1RHM8_PIG	P43487	24 kDa	0.88	1
RAB2A, member RAS oncogene family OS=Sus scrofa OX=9823 GN=RAB2A PE=4 SV=4	tr|F1RT87|F1RT87_PIG	P61019	25 kDa	0.88	1.1
Acyl-CoA thioesterase 9 OS=Sus scrofa OX=9823 GN=ACOT9 PE=1 SV=4	tr|F1SQ00|F1SQ00_PIG	Q9Y305	49 kDa	0.88	1
Heterogeneous nuclear ribonucleoprotein A3 OS=Sus scrofa OX=9823 GN=HNRNPA3 PE=1 SV=3	tr|F2Z5B4|F2Z5B4_PIG	P51991	40 kDa	0.88	0.9
Dual specificity mitogen-activated protein kinase kinase 2 OS=Sus scrofa OX=9823 GN=MAP2K2 PE=1 SV=3	tr|K7GPS0|K7GPS0_PIG	P36507	44 kDa	0.88	0.9
Propionyl-CoA carboxylase beta chain, mitochondrial OS=Sus scrofa OX=9823 GN=PCCB PE=1 SV=1	sp|P79384|PCCB_PIG	P05166	59 kDa	0.89	1
Alpha-crystallin B chain OS=Sus scrofa OX=9823 GN=CRYAB PE=2 SV=1	sp|Q7M2W6|CRYAB_PIG	P02511	20 kDa	0.89	1
Glutathione S-transferase omega-1 OS=Sus scrofa OX=9823 GN=GSTO1 PE=1 SV=2	sp|Q9N1F5|GSTO1_PIG	P78417	27 kDa	0.89	0.9
Trans-3-hydroxy-L-proline dehydratase isoform a OS=Sus scrofa OX=9823 GN=L3HYPDH PE=4 SV=1	tr|A0A286ZTS1|A0A286ZTS1_PIG	Q96EM0	38 kDa	0.89	0.8
Nucleoside diphosphate kinase OS=Sus scrofa OX=9823 GN=NME1 PE=1 SV=1	tr|A0A287AS29|A0A287AS29_PIG	P15531	17 kDa	0.89	1.1
Ubiquilin 1 OS=Sus scrofa OX=9823 GN=UBQLN1 PE=1 SV=1	tr|A0A287AYH3|A0A287AYH3_PIG	Q9UMX0	62 kDa	0.89	1
Copine 3 OS=Sus scrofa OX=9823 GN=CPNE3 PE=1 SV=1	tr|A0A287B2X0|A0A287B2X0_PIG	O75131	64 kDa	0.89	1.1
Apolipoprotein B mRNA editing enzyme catalytic subunit 2 OS=Sus scrofa OX=9823 GN=APOBEC2 PE=1 SV=1	tr|A0A287B5C0|A0A287B5C0_PIG	P06727	26 kDa	0.89	1
Myosin-11 OS=Sus scrofa OX=9823 GN=MYH11 PE=1 SV=1	tr|A0A287BB68|A0A287BB68_PIG	P35749	197 kDa	0.89	0.9
Glycerol-3-phosphate dehydrogenase [NAD(+)] OS=Sus scrofa OX=9823 GN=GPD1L PE=1 SV=1	tr|A0A5G2QYS6|A0A5G2QYS6_PIG	Q8N335	41 kDa	0.89	1
Heat shock protein family A (Hsp70) member 4 OS=Sus scrofa OX=9823 GN=HSPA4 PE=1 SV=1	tr|A0A5G2R0T1|A0A5G2R0T1_PIG	P34932	92 kDa	0.89	1
Angiotensinogen OS=Sus scrofa OX=9823 GN=AGT PE=1 SV=1	tr|A0A5K1UCV8|A0A5K1UCV8_PIG (+1)	P01019	52 kDa	0.89	1.1
Zyxin OS=Sus scrofa OX=9823 GN=ZYX PE=1 SV=1	tr|F1SRV9|F1SRV9_PIG	Q15942	61 kDa	0.89	1.1
Capping actin protein, gelsolin like OS=Sus scrofa OX=9823 GN=CAPG PE=1 SV=1	tr|F1SVB0|F1SVB0_PIG	P40121	39 kDa	0.89	0.9
Tyrosine 3-monooxygenase/tryptophan 5-monooxygenase activation protein gamma OS=Sus scrofa OX=9823 GN=YWHAG PE=3 SV=1	tr|F2Z4Z1|F2Z4Z1_PIG	P61981	28 kDa	0.89	1
Prenylcysteine oxidase 1 OS=Sus scrofa OX=9823 GN=PCYOX1 PE=1 SV=3	tr|I3L9F5|I3L9F5_PIG	Q9UHG3	57 kDa	0.89	1.1
Methionine aminopeptidase 2 OS=Sus scrofa OX=9823 GN=METAP2 PE=1 SV=2	tr|I3LSP1|I3LSP1_PIG	P50579	53 kDa	0.89	0.8
2-oxoglutarate dehydrogenase, mitochondrial OS=Sus scrofa OX=9823 GN=OGDH PE=1 SV=1	tr|K9IVI1|K9IVI1_PIG	Q02218	116 kDa	0.89	1
[truncated: 2,420 more rows]

## Sheet: ALAM_MS1211 lung VPA vs lung 
Identified Proteins (4480)	Accession Number	Gene	Accesion number human	Molecular Weight	T-Test (p-value): (p < 0.05)	Fold Change by Category
Vitamin K-dependent protein C OS=Sus scrofa OX=9823 GN=PROC PE=3 SV=1	tr|A0A5G2RIA8|A0A5G2RIA8_PIG	PROC	P04070	55 kDa	0.00014	0
60S ribosomal protein L13a OS=Sus scrofa OX=9823 GN=RPL13A PE=1 SV=2	tr|A0A287B929|A0A287B929_PIG	RPL13A	P40429	56 kDa	0.0005	0.1
Uncharacterized protein OS=Sus scrofa OX=9823 GN=RPL12 PE=1 SV=1	tr|A0A5G2R7M9|A0A5G2R7M9_PIG			18 kDa	0.00084	0.6
PDZ domain-containing protein OS=Sus scrofa OX=9823 GN=PSMD9 PE=1 SV=1	tr|A0A286ZLP7|A0A286ZLP7_PIG	PSMD9	O00233	24 kDa	0.00096	0.3
Folate receptor beta OS=Sus scrofa OX=9823 GN=FOLR2 PE=1 SV=1	tr|A0A287BJS7|A0A287BJS7_PIG	FOLR2	P14207	35 kDa	0.0017	0
CCHC-type zinc finger nucleic acid binding protein OS=Sus scrofa OX=9823 GN=CNBP PE=1 SV=2	tr|A0A287B975|A0A287B975_PIG	CNBP	P62633	18 kDa	0.0019	0.2
Sideroflexin-1 OS=Sus scrofa OX=9823 GN=SFXN1 PE=2 SV=1	sp|A5A761|SFXN1_PIG	SFXN1	Q9H9B4	36 kDa	0.0027	0.3
VAMP associated protein A OS=Sus scrofa OX=9823 GN=VAPA PE=1 SV=1	tr|A0A287BBB5|A0A287BBB5_PIG	VAPA	Q9P0L0	32 kDa	0.0029	0.3
Purine nucleoside phosphorylase OS=Sus scrofa OX=9823 GN=PNP PE=1 SV=1	tr|A0A287AM78|A0A287AM78_PIG	PNP	P00491	32 kDa	0.003	2.4
Myoglobin OS=Sus scrofa OX=9823 GN=MB PE=1 SV=2	sp|P02189|MYG_PIG	MB	P02144	17 kDa	0.004	6.8
60S ribosomal protein L34 OS=Sus scrofa OX=9823 GN=RPL34 PE=1 SV=3	sp|Q29223|RL34_PIG	RPL34	P49207	13 kDa	0.004	0
Rac family small GTPase 2 OS=Sus scrofa OX=9823 GN=RAC2 PE=1 SV=1	tr|A0A5G2R6S0|A0A5G2R6S0_PIG	RAC2	P15153	21 kDa	0.0049	0.3
DNA-directed RNA polymerase II subunit RPB3 OS=Sus scrofa OX=9823 GN=POLR2C PE=1 SV=1	tr|I3LCH3|I3LCH3_PIG	POLR2C	P19387	31 kDa	0.0051	0
Secernin 3 OS=Sus scrofa OX=9823 GN=SCRN3 PE=1 SV=1	tr|A0A287A4K2|A0A287A4K2_PIG (+1)	SCRN3	Q0VDG4	48 kDa	0.0052	0
Peroxiredoxin-6 OS=Sus scrofa OX=9823 GN=PRDX6 PE=2 SV=3	sp|Q9TSX9|PRDX6_PIG	PRDX6	P30041	25 kDa	0.0053	1.4
Nicalin OS=Sus scrofa OX=9823 GN=NCLN PE=1 SV=1	tr|A0A481CWD2|A0A481CWD2_PIG (+1)	NCLN	Q969V3	63 kDa	0.0053	0.2
SAM and SH3 domain containing 3 OS=Sus scrofa OX=9823 GN=SASH3 PE=4 SV=3	tr|F1RTH8|F1RTH8_PIG	SASH3	O75995	46 kDa	0.0054	0
Peptidylprolyl isomerase OS=Sus scrofa OX=9823 GN=ARF3 PE=1 SV=2	tr|A0A287B5T6|A0A287B5T6_PIG	ARF3	P61204	38 kDa	0.0057	1.5
Palmitoyl-protein thioesterase 1 OS=Sus scrofa OX=9823 GN=PPT1 PE=1 SV=1	tr|A0A5G2QB02|A0A5G2QB02_PIG	PPT1	P50897	31 kDa	0.0057	0
Uncharacterized protein OS=Sus scrofa OX=9823 GN=PEBP1 PE=1 SV=1	tr|F1RKG8|F1RKG8_PIG			21 kDa	0.0062	0.7
Uncharacterized protein OS=Sus scrofa OX=9823 GN=MYL3 PE=1 SV=3	tr|F1SNW4|F1SNW4_PIG			22 kDa	0.0062	2.5
Twinfilin actin binding protein 2 OS=Sus scrofa OX=9823 GN=TWF2 PE=1 SV=1	tr|A0A287A3P5|A0A287A3P5_PIG	TWF2	Q6IBS0	36 kDa	0.0065	0
Golgi reassembly stacking protein 2 OS=Sus scrofa OX=9823 GN=GORASP2 PE=1 SV=1	tr|A0A5G2QDE7|A0A5G2QDE7_PIG	GORASP2	Q9H8Y8	47 kDa	0.0065	0.3
Ectonucleotide pyrophosphatase/phosphodiesterase 1 OS=Sus scrofa OX=9823 GN=ENPP1 PE=1 SV=2	tr|A0A287AT99|A0A287AT99_PIG	ENPP1	P22413	83 kDa	0.0066	0.3
Glutathione peroxidase OS=Sus scrofa OX=9823 GN=GPX3 PE=1 SV=1	tr|A0A287AIJ3|A0A287AIJ3_PIG	GPX3	P22352	26 kDa	0.0067	3.6
Elongation factor Ts, mitochondrial OS=Sus scrofa OX=9823 GN=TSFM PE=1 SV=1	tr|A0A5G2QFS9|A0A5G2QFS9_PIG	TSFM	P43897	42 kDa	0.0067	0.1
Nucleobindin 1 OS=Sus scrofa OX=9823 GN=NUCB1 PE=1 SV=1	tr|A0A5G2RF91|A0A5G2RF91_PIG	NUCB1	Q02818	52 kDa	0.0068	0.3
Large proline-rich protein BAG6 OS=Sus scrofa OX=9823 GN=BAG6 PE=1 SV=1	sp|A5D9M6|BAG6_PIG (+2)	BAG6	P46379	119 kDa	0.0069	0.2
Uncharacterized protein OS=Sus scrofa OX=9823 GN=TNXB PE=1 SV=2	tr|K7GRK7|K7GRK7_PIG			447 kDa	0.007	0
DnaJ heat shock protein family (Hsp40) member B4 OS=Sus scrofa OX=9823 GN=DNAJB4 PE=4 SV=2	tr|F1S9T0|F1S9T0_PIG	DNAJB4	Q9UDY4	38 kDa	0.0072	0.3
Mitochondrial import inner membrane translocase subunit OS=Sus scrofa OX=9823 GN=TIMM8A PE=1 SV=1	tr|F1S1L1|F1S1L1_PIG	TIMM8A	O60220	11 kDa	0.0074	0.2
Proteasome subunit beta OS=Sus scrofa OX=9823 GN=PSMB3 PE=1 SV=1	tr|A0A286ZN52|A0A286ZN52_PIG	PSMB3	P49720	23 kDa	0.0075	1.8
Carbonic anhydrase OS=Sus scrofa OX=9823 GN=CA1 PE=1 SV=1	tr|A0A287AI92|A0A287AI92_PIG	CA1	P00915	29 kDa	0.0077	2.6
60S ribosomal protein L21 OS=Sus scrofa OX=9823 GN=RPL21 PE=1 SV=3	sp|P49666|RL21_PIG	RPL21	P46778	19 kDa	0.0082	0.4
LRRcap domain-containing protein OS=Sus scrofa OX=9823 GN=ANP32B PE=1 SV=2	tr|A0A287A8X8|A0A287A8X8_PIG (+2)	ANP32B	Q92688	29 kDa	0.0084	0.3
ETHE1 persulfide dioxygenase OS=Sus scrofa OX=9823 GN=ETHE1 PE=1 SV=3	tr|F1RMV5|F1RMV5_PIG	ETHE1	O95571	28 kDa	0.0087	0.3
Peptidylprolyl isomerase OS=Sus scrofa OX=9823 GN=FKBP1A PE=1 SV=2	tr|Q2VTP6|Q2VTP6_PIG	FKBP1A	P62942	25 kDa	0.0092	0.4
Proteasome 26S subunit, ATPase 6 OS=Sus scrofa OX=9823 GN=PSMC6 PE=1 SV=2	tr|A0A286ZXG4|A0A286ZXG4_PIG	PSMC6	P62333	46 kDa	0.01	0.4
Uncharacterized protein OS=Sus scrofa OX=9823 GN=WDFY1 PE=1 SV=1	tr|A0A287AXD6|A0A287AXD6_PIG (+1)			46 kDa	0.01	0
Inosine triphosphate pyrophosphatase OS=Sus scrofa OX=9823 GN=ITPA PE=3 SV=2	tr|A0A287B9Y7|A0A287B9Y7_PIG	ITPA	Q9BY32	22 kDa	0.01	0
Dihydrolipoyllysine-residue succinyltransferase component of 2-oxoglutarate dehydrogenase complex, mitochondrial OS=Sus scrofa OX=9823 GN=DLST PE=1 SV=1	sp|Q9N0F1|ODO2_PIG	DLST	P36957	49 kDa	0.011	1.9
Eukaryotic translation initiation factor 4B OS=Sus scrofa OX=9823 GN=EIF4B PE=4 SV=2	tr|A0A287AT83|A0A287AT83_PIG	EIF4B	P23588	70 kDa	0.011	0.3
Proteasome subunit beta OS=Sus scrofa OX=9823 GN=PSMB8 PE=1 SV=1	tr|A5D9J4|A5D9J4_PIG (+1)	PSMB8	P28062	31 kDa	0.011	2.7
RNA binding motif protein 14 OS=Sus scrofa OX=9823 GN=RBM14 PE=1 SV=3	tr|F1RUT1|F1RUT1_PIG	RBM14	Q96PK6	40 kDa	0.011	0.3
Myosin_tail_1 domain-containing protein OS=Sus scrofa OX=9823 GN=CGN PE=1 SV=1	tr|A0A287AXZ5|A0A287AXZ5_PIG	CGN	Q9P2M7	136 kDa	0.012	0.3
ASPSCR1 tether for SLC2A4, UBX domain containing OS=Sus scrofa OX=9823 GN=ASPSCR1 PE=4 SV=1	tr|A0A287BCG1|A0A287BCG1_PIG	ASPSCR1	Q9BZE9	60 kDa	0.012	0
cAMP-dependent protein kinase type II-alpha regulatory subunit (Fragment) OS=Sus scrofa OX=9823 GN=PRKAR2A PE=1 SV=1	sp|P05207|KAP2_PIG	PRKAR2A	P13861	18 kDa	0.014	0.2
40S ribosomal protein S28 OS=Sus scrofa OX=9823 GN=RPS28 PE=1 SV=2	sp|Q6QAT1|RS28_PIG	RPS28	P62857	8 kDa	0.014	0.3
AFP-like domain-containing protein OS=Sus scrofa OX=9823 GN=ANP32B PE=1 SV=1	tr|A0A287AFR6|A0A287AFR6_PIG		Not present in human	39 kDa	0.014	0.3
Proteasome subunit alpha type OS=Sus scrofa OX=9823 GN=PSMA7 PE=1 SV=1	tr|A0A287AT18|A0A287AT18_PIG	PSMA7	O14818	28 kDa	0.014	1.3
Phosphoprotein membrane anchor with glycosphingolipid microdomains 1 OS=Sus scrofa OX=9823 GN=PAG1 PE=4 SV=1	tr|A0A287AZD0|A0A287AZD0_PIG (+1)	PAG1	Q9NWQ8	45 kDa	0.014	0
Uncharacterized protein OS=Sus scrofa OX=9823 GN=SSR1 PE=1 SV=1	tr|A0A5G2QG70|A0A5G2QG70_PIG (+1)			32 kDa	0.014	0.3
MAGUK p55 subfamily member 5 isoform X1 OS=Sus scrofa OX=9823 GN=MPP5 PE=1 SV=3	tr|F1SA41|F1SA41_PIG	MPP5	Q8N3R9	77 kDa	0.014	0
Uncharacterized protein OS=Sus scrofa OX=9823 GN=APOBR PE=4 SV=2	tr|A0A287AGN1|A0A287AGN1_PIG			137 kDa	0.015	0.1
Metadherin OS=Sus scrofa OX=9823 GN=MTDH PE=1 SV=1	tr|A0A286ZU54|A0A286ZU54_PIG (+2)	MTDH	Q86UE4	67 kDa	0.016	0.3
S-formylglutathione hydrolase OS=Sus scrofa OX=9823 GN=ESD PE=2 SV=1	sp|Q9GJT2|ESTD_PIG	ESD	P10768	31 kDa	0.017	0.5
Aminoacyl tRNA synthetase complex interacting multifunctional protein 1 OS=Sus scrofa OX=9823 GN=AIMP1 PE=1 SV=2	tr|A0A287AKA2|A0A287AKA2_PIG (+1)	AIMP1	Q12904	36 kDa	0.017	0.3
SH3 and multiple ankyrin repeat domains 3 OS=Sus scrofa OX=9823 GN=SHANK3 PE=4 SV=2	tr|A0A287ASF0|A0A287ASF0_PIG	SHANK3	Q9BYB0	186 kDa	0.017	0
RNA binding motif protein 14 OS=Sus scrofa OX=9823 GN=RBM14 PE=1 SV=1	tr|A0A287B401|A0A287B401_PIG	RBM14	Q96PK6	70 kDa	0.017	0.3
Nucleoside diphosphate kinase OS=Sus scrofa OX=9823 GN=NME2 PE=1 SV=1	tr|A0A5G2Q9S0|A0A5G2Q9S0_PIG	NME2	P22392	43 kDa	0.017	1.2
Mitochondrial import inner membrane translocase subunit TIM50 OS=Sus scrofa OX=9823 GN=TIMM50 PE=1 SV=1	tr|A0A480LC98|A0A480LC98_PIG	TIMM50	Q3ZCQ8	40 kDa	0.018	0.2
SGT1 homolog, MIS12 kinetochore complex assembly cochaperone OS=Sus scrofa OX=9823 GN=SUGT1 PE=1 SV=1	tr|A0A5G2QN18|A0A5G2QN18_PIG	SUGT1	Q9Y2Z0	38 kDa	0.018	0.3
Lectin, mannose binding 2 OS=Sus scrofa OX=9823 GN=LMAN2 PE=1 SV=1	tr|F1S3D5|F1S3D5_PIG	LMAN2	Q12907	40 kDa	0.018	0.3
HtrA serine peptidase 2 OS=Sus scrofa OX=9823 GN=HTRA2 PE=4 SV=2	tr|A0A287A6X5|A0A287A6X5_PIG	HTRA2	O43464	47 kDa	0.019	0
MICOS complex subunit OS=Sus scrofa OX=9823 GN=CHCHD3 PE=1 SV=1	tr|A0A287AC97|A0A287AC97_PIG	CHCHD3	Q9NX63	27 kDa	0.019	0.4
Alkaline phosphatase OS=Sus scrofa OX=9823 GN=ALPL PE=3 SV=2	tr|A0A287BSC3|A0A287BSC3_PIG	ALPL	P05186	91 kDa	0.019	0.3
Programmed cell death 6 OS=Sus scrofa OX=9823 GN=PDCD6 PE=1 SV=2	tr|A0A287AKU6|A0A287AKU6_PIG	PDCD6	PDCD6	33 kDa	0.021	1.3
Filamin binding LIM protein 1 OS=Sus scrofa OX=9823 GN=FBLIM1 PE=1 SV=1	tr|A0A287B044|A0A287B044_PIG (+4)	FBLIM1	Q8WUP2	44 kDa	0.022	0.1
Methylthioribulose-1-phosphate dehydratase OS=Sus scrofa OX=9823 GN=APIP PE=1 SV=1	tr|A0A5G2R267|A0A5G2R267_PIG	APIP	Q96GX9	27 kDa	0.022	0.3
Calnexin OS=Sus scrofa OX=9823 GN=CANX PE=1 SV=2	tr|A0A286ZSW6|A0A286ZSW6_PIG	CANX	P27824	68 kDa	0.024	0.8
Eukaryotic translation initiation factor 1 OS=Sus scrofa OX=9823 GN=EIF1 PE=1 SV=1	tr|A0A5G2QLD8|A0A5G2QLD8_PIG	EIF1	P41567	13 kDa	0.024	0.4
Protein S100-A10 OS=Sus scrofa OX=9823 GN=S100A10 PE=1 SV=2	sp|P04163|S10AA_PIG (+1)	S100A10	P60903	11 kDa	0.025	1.9
Uncharacterized protein OS=Sus scrofa OX=9823 GN=RAB4B PE=1 SV=2	tr|A0A287B4X7|A0A287B4X7_PIG			22 kDa	0.025	6.9
Arachidonate 15-lipoxygenase OS=Sus scrofa OX=9823 GN=ALOX15 PE=3 SV=2	tr|A0A2C9F3G7|A0A2C9F3G7_PIG (+1)	ALOX15	P16050	85 kDa	0.026	0.3
IF rod domain-containing protein OS=Sus scrofa OX=9823 GN=KRT8 PE=1 SV=2	tr|A0A287A8E9|A0A287A8E9_PIG	KRT8	Q96GE1	49 kDa	0.027	0.2
Calreticulin OS=Sus scrofa OX=9823 GN=CALR PE=1 SV=3	sp|P28491|CALR_PIG	CALR	P27797	48 kDa	0.028	0.8
Complement C1q binding protein OS=Sus scrofa OX=9823 GN=C1QBP PE=2 SV=1	tr|A0A0D5BWD2|A0A0D5BWD2_PIG (+1)	C1QBP	Q07021	31 kDa	0.028	0.5
Torsin 1A interacting protein 1 OS=Sus scrofa OX=9823 GN=TOR1AIP1 PE=1 SV=1	tr|A0A287B642|A0A287B642_PIG	TOR1AIP1	Q5JTV8	67 kDa	0.028	0.4
Alpha-2-macroglobulin receptor-associated protein OS=Sus scrofa OX=9823 GN=LRPAP1 PE=1 SV=3	tr|F1S8M9|F1S8M9_PIG	LRPAP1	P30533	42 kDa	0.028	0.5
60S acidic ribosomal protein P1 OS=Sus scrofa OX=9823 GN=RPLP1 PE=1 SV=1	tr|F1SIT7|F1SIT7_PIG	RPLP1	P05386	12 kDa	0.028	0.5
Cytochrome c1 OS=Sus scrofa OX=9823 GN=CYC1 PE=1 SV=1	tr|A0A287AZF9|A0A287AZF9_PIG	CYC1	P08574	35 kDa	0.029	0.5
Uncharacterized protein OS=Sus scrofa OX=9823 GN=EEF1B2 PE=1 SV=1	tr|F1SHD6|F1SHD6_PIG			25 kDa	0.029	0.5
Calcium regulated heat stable protein 1 OS=Sus scrofa OX=9823 GN=CARHSP1 PE=4 SV=2	tr|I3LCU9|I3LCU9_PIG	CARHSP1	Q9Y2V2	16 kDa	0.029	0.5
Chondroitin sulfate proteoglycan 4 OS=Sus scrofa OX=9823 GN=CSPG4 PE=1 SV=3	tr|F1SJ86|F1SJ86_PIG	CSPG4	Q6UVK1	250 kDa	0.031	0.2
Proteasome endopeptidase complex OS=Sus scrofa OX=9823 GN=PSMA6 PE=1 SV=2	tr|A0A287AVI5|A0A287AVI5_PIG	PSMA6	P60900	96 kDa	0.032	1.6
Carbonic anhydrase OS=Sus scrofa OX=9823 GN=CA2 PE=1 SV=2	tr|F1RXC2|F1RXC2_PIG	CA2	P00918	29 kDa	0.032	2.2
H1 histone family member 0 OS=Sus scrofa OX=9823 GN=H1F0 PE=1 SV=1	tr|A0A287BQW3|A0A287BQW3_PIG	H1F0	P07305	21 kDa	0.033	0.5
Eukaryotic translation initiation factor 4E OS=Sus scrofa OX=9823 GN=EIF4E PE=1 SV=1	tr|A0A5G2RC36|A0A5G2RC36_PIG	EIF4E	P06730	25 kDa	0.033	0.4
Desmoplakin OS=Sus scrofa OX=9823 GN=DSP PE=1 SV=3	tr|F1RW75|F1RW75_PIG	DSP	P15924	332 kDa	0.033	0.5
Testin OS=Sus scrofa OX=9823 GN=TES PE=3 SV=1	sp|Q2QLE3|TES_PIG	TES	Q9UGI8	48 kDa	0.034	0.1
Importin 9 OS=Sus scrofa OX=9823 GN=IPO9 PE=1 SV=2	tr|A0A287B8Q1|A0A287B8Q1_PIG	IPO9	Q96P70	101 kDa	0.034	0.2
GMP reductase OS=Sus scrofa OX=9823 GN=GMPR2 PE=1 SV=1	tr|A0A287A4Y2|A0A287A4Y2_PIG	GMPR2	Q9P2T1	38 kDa	0.036	7.4
Ig-like domain-containing protein OS=Sus scrofa OX=9823 PE=4 SV=2	tr|A0A287BAB3|A0A287BAB3_PIG		Not present in human	18 kDa	0.036	2.1
Membrane bound O-acyltransferase domain containing 7 OS=Sus scrofa OX=9823 GN=MBOAT7 PE=1 SV=3	tr|F1RNH0|F1RNH0_PIG	MBOAT7	Q96N66	53 kDa	0.036	0.3
AAA domain-containing protein OS=Sus scrofa OX=9823 GN=PSMC2 PE=1 SV=2	tr|F1SB53|F1SB53_PIG	PSMC2	P35998	49 kDa	0.036	0.5
Uncharacterized protein OS=Sus scrofa OX=9823 GN=RAB10 PE=1 SV=1	tr|F2Z5F2|F2Z5F2_PIG			23 kDa	0.036	0.3
40S ribosomal protein S20 OS=Sus scrofa OX=9823 GN=RPS20 PE=1 SV=1	sp|A1XQU9|RS20_PIG (+1)	RPS20	P60866	13 kDa	0.037	0.5
GIT ArfGAP 2 OS=Sus scrofa OX=9823 GN=GIT2 PE=4 SV=1	tr|A0A287A2S3|A0A287A2S3_PIG	GIT2	Q14161	94 kDa	0.037	0.1
Lysosome-associated membrane glycoprotein 2 isoform A OS=Sus scrofa OX=9823 GN=LAMP2 PE=1 SV=1	tr|A0A287B836|A0A287B836_PIG (+2)	LAMP2	P13473	45 kDa	0.037	INF
Inter-alpha-trypsin inhibitor heavy chain 5 OS=Sus scrofa OX=9823 GN=ITIH5 PE=1 SV=1	tr|A0A5G2QEG8|A0A5G2QEG8_PIG (+1)	ITIH5	Q86UX2	96 kDa	0.037	0.3
Ig-like domain-containing protein OS=Sus scrofa OX=9823 PE=1 SV=1	tr|A0A287A4Y3|A0A287A4Y3_PIG		Not present in human	25 kDa	0.038	1.4
STT3 oligosaccharyltransferase complex catalytic subunit B OS=Sus scrofa OX=9823 GN=STT3B PE=1 SV=1	tr|F1RRF2|F1RRF2_PIG	STT3B	Q8TCJ2	94 kDa	0.038	0.3
Negative elongation factor D OS=Sus scrofa OX=9823 GN=NELFCD PE=4 SV=1	tr|A0A286ZNQ3|A0A286ZNQ3_PIG	NELFCD	Q8IXH7	73 kDa	0.04	0
Uncharacterized protein OS=Sus scrofa OX=9823 GN=MTCH2 PE=3 SV=2	tr|A0A286ZU97|A0A286ZU97_PIG			37 kDa	0.04	0.3
GA binding protein transcription factor subunit alpha OS=Sus scrofa OX=9823 GN=GABPA PE=3 SV=2	tr|A0A286ZW39|A0A286ZW39_PIG (+2)	GABPA	Q06546	49 kDa	0.04	0
G protein subunit beta 4 OS=Sus scrofa OX=9823 GN=GNB4 PE=4 SV=1	tr|A0A287A365|A0A287A365_PIG	GNB4	Q9HAV0	38 kDa	0.04	0.1
Actinin alpha 4 OS=Sus scrofa OX=9823 GN=ACTN4 PE=1 SV=1	tr|A0A287A7I2|A0A287A7I2_PIG	ACTN4	O43707	131 kDa	0.04	0.2
Proteasome subunit beta OS=Sus scrofa OX=9823 GN=PSMB4 PE=1 SV=1	tr|A0A287B088|A0A287B088_PIG	PSMB4	P28070	29 kDa	0.04	2.4
Receptor interacting serine/threonine kinase 1 OS=Sus scrofa OX=9823 GN=RIPK1 PE=4 SV=1	tr|A0A287BRT1|A0A287BRT1_PIG	RIPK1	Q13546	75 kDa	0.04	0
Ribosomal L1 domain containing 1 OS=Sus scrofa OX=9823 GN=RSL1D1 PE=1 SV=1	tr|A0A481ARY0|A0A481ARY0_PIG	RSL1D1	O76021	54 kDa	0.04	0
Beta 3-glucosyltransferase OS=Sus scrofa OX=9823 GN=B3GLCT PE=1 SV=1	tr|A0A5G2QD02|A0A5G2QD02_PIG	B3GLCT	Q6Y288	53 kDa	0.04	0
Plakophilin 3 OS=Sus scrofa OX=9823 GN=PKP3 PE=1 SV=1	tr|A0A5G2QZ45|A0A5G2QZ45_PIG (+1)	PKP3	Q9Y446	92 kDa	0.04	0
Glycogen [starch] synthase OS=Sus scrofa OX=9823 GN=GYS1 PE=1 SV=3	tr|F1RIP1|F1RIP1_PIG	GYS1	P13807	84 kDa	0.04	0
ADP ribosylation factor 1 OS=Sus scrofa OX=9823 GN=ARF1 PE=1 SV=1	tr|F6Q3P3|F6Q3P3_PIG	ARF1	P84077	21 kDa	0.04	0
Pulmonary surfactant-associated protein C OS=Sus scrofa OX=9823 GN=SP-C PE=2 SV=1	tr|Q3MSM1|Q3MSM1_PIG	SFTPC	P11686	23 kDa	0.04	0
Ig-like domain-containing protein OS=Sus scrofa OX=9823 PE=4 SV=7	tr|A0A075B7J0|A0A075B7J0_PIG		Not present in human	10 kDa	0.041	0.4
Uncharacterized protein OS=Sus scrofa OX=9823 GN=ACP2 PE=1 SV=1	tr|A0A287A023|A0A287A023_PIG			48 kDa	0.041	INF
Transcription elongation regulator 1 OS=Sus scrofa OX=9823 GN=TCERG1 PE=1 SV=1	tr|A0A5G2R6R6|A0A5G2R6R6_PIG	TCERG1	O14776	119 kDa	0.041	0.3
E3 UFM1-protein ligase 1 OS=Sus scrofa OX=9823 GN=UFL1 PE=1 SV=3	tr|I3LUL6|I3LUL6_PIG	UFL1	O94874	89 kDa	0.041	0.5
Endoplasmic reticulum chaperone BiP OS=Sus scrofa OX=9823 GN=HSPA5 PE=3 SV=2	tr|A0A287BIL8|A0A287BIL8_PIG	HSPA5	P11021	73 kDa	0.042	0.7
Fibroleukin OS=Sus scrofa OX=9823 GN=FGL2 PE=1 SV=1	tr|F6Q194|F6Q194_PIG	FGL2	Q14314	56 kDa	0.042	0
TAR DNA binding protein OS=Sus scrofa OX=9823 GN=TARDBP PE=4 SV=2	tr|I3LNA4|I3LNA4_PIG	TARDBP	Q13148	45 kDa	0.042	0.5
Uncharacterized protein OS=Sus scrofa OX=9823 GN=PEX19 PE=1 SV=1	tr|A0A5G2R2X9|A0A5G2R2X9_PIG			39 kDa	0.043	0
40S ribosomal protein S5 OS=Sus scrofa OX=9823 GN=RPS5 PE=1 SV=1	tr|F2Z5E6|F2Z5E6_PIG	RPS5	P46782	23 kDa	0.043	0.6
Fip1 domain-containing protein OS=Sus scrofa OX=9823 GN=FIP1L1 PE=1 SV=1	tr|A0A286ZNR6|A0A286ZNR6_PIG (+1)	FIP1L1	Q6UN15	67 kDa	0.044	0
Ig-like domain-containing protein OS=Sus scrofa OX=9823 GN=BSG PE=1 SV=1	tr|A0A286ZS77|A0A286ZS77_PIG (+1)	BSG	P35613	30 kDa	0.044	0.3
NADH dehydrogenase [ubiquinone] flavoprotein 1, mitochondrial OS=Sus scrofa OX=9823 GN=NDUFV1 PE=1 SV=1	tr|F1RVN1|F1RVN1_PIG	NDUFV1	P49821	51 kDa	0.044	0.4
Fibrillin-1 OS=Sus scrofa OX=9823 GN=FBN1 PE=1 SV=3	tr|F1SN67|F1SN67_PIG	FBN1	P35555	312 kDa	0.044	0.3
Zinc finger protein 207 OS=Sus scrofa OX=9823 GN=ZNF207 PE=1 SV=2	tr|A0A286ZT20|A0A286ZT20_PIG (+3)	ZNF207	O43670	51 kDa	0.045	0
CGG triplet repeat-binding protein 1 OS=Sus scrofa OX=9823 GN=CGGBP1 PE=1 SV=1	tr|A0A287ARL7|A0A287ARL7_PIG	CGGBP1	Q9UFW8	19 kDa	0.045	0
EKC/KEOPS complex subunit GON7 OS=Sus scrofa OX=9823 PE=4 SV=1	tr|A0A5S6FUH2|A0A5S6FUH2_PIG	GON7	Q9BXV9	11 kDa	0.045	0
SERPIN domain-containing protein OS=Sus scrofa OX=9823 GN=SERPINA3-2 PE=1 SV=1	tr|F6Q469|F6Q469_PIG		Not present in human	46 kDa	0.045	2.2
Protein phosphatase, Mg2+/Mn2+ dependent 1A OS=Sus scrofa OX=9823 GN=PPM1A PE=1 SV=1	tr|A0A286ZNX8|A0A286ZNX8_PIG (+2)	PPM1A	P35813	43 kDa	0.046	0.2
6-phosphogluconolactonase OS=Sus scrofa OX=9823 GN=PGLS PE=1 SV=2	tr|A0A286ZS31|A0A286ZS31_PIG	PGLS	O95336	28 kDa	0.046	0.5
Maturin, neural progenitor differentiation regulator homolog OS=Sus scrofa OX=9823 GN=MTURN PE=1 SV=1	tr|A0A286ZWP7|A0A286ZWP7_PIG (+2)	MTURN	Q8N3F0	16 kDa	0.046	0
Ig-like domain-containing protein OS=Sus scrofa OX=9823 GN=SLA-8 PE=1 SV=2	tr|A0A287AM07|A0A287AM07_PIG (+3)		Not present in human	45 kDa	0.046	0
EH domain binding protein 1 like 1 OS=Sus scrofa OX=9823 GN=EHBP1L1 PE=1 SV=1	tr|A0A5G2QHU5|A0A5G2QHU5_PIG	EHBP1L1	Q8N3D4	166 kDa	0.046	0
CD2 associated protein OS=Sus scrofa OX=9823 GN=CD2AP PE=1 SV=1	tr|A0A5G2QYB3|A0A5G2QYB3_PIG	CD2AP	Q9Y5K6	71 kDa	0.046	0.4
Prothymosin alpha OS=Sus scrofa OX=9823 GN=PTMA PE=1 SV=1	tr|A0A5G2RFE7|A0A5G2RFE7_PIG	PTMA	P06454	14 kDa	0.046	0.2
Lactoylglutathione lyase OS=Sus scrofa OX=9823 GN=GLO1 PE=1 SV=1	tr|I3LDM7|I3LDM7_PIG	GLO1	Q04760	21 kDa	0.046	0.6
Peptidyl arginine deiminase 2 OS=Sus scrofa OX=9823 GN=PADI2 PE=4 SV=3	tr|I3LNE4|I3LNE4_PIG	PADI2	Q9Y2J8	78 kDa	0.046	0.2
Ubiquitin-like modifier-activating enzyme ATG7 OS=Sus scrofa OX=9823 GN=ATG7 PE=3 SV=2	tr|A0A286ZKK7|A0A286ZKK7_PIG (+5)	ATG7	O95352	78 kDa	0.047	0.2
Erbb2 interacting protein OS=Sus scrofa OX=9823 GN=ERBIN PE=1 SV=2	tr|A0A286ZYU9|A0A286ZYU9_PIG	ERBIN	Q96RT1	154 kDa	0.047	0
Microfibril associated protein 2 OS=Sus scrofa OX=9823 GN=MFAP2 PE=1 SV=1	tr|A0A287AAB8|A0A287AAB8_PIG (+2)	MFAP2	P55001	20 kDa	0.047	0
UDP-N-acetylglucosamine pyrophosphorylase 1 OS=Sus scrofa OX=9823 GN=UAP1 PE=1 SV=1	tr|A0A480KKH4|A0A480KKH4_PIG	UAP1	Q16222	59 kDa	0.047	0
NADH:ubiquinone oxidoreductase subunit A6 OS=Sus scrofa OX=9823 GN=NDUFA6 PE=3 SV=3	tr|F1SJP6|F1SJP6_PIG	NDUFA6	P56556	18 kDa	0.047	0
60S ribosomal protein L8 OS=Sus scrofa OX=9823 GN=RPL8 PE=1 SV=1	tr|F2Z567|F2Z567_PIG	RPL8	P62917	28 kDa	0.047	0.5
Histone H2A OS=Sus scrofa OX=9823 GN=LOC102159655 PE=3 SV=1	tr|F2Z5L2|F2Z5L2_PIG	MACROH2A1	D6RCF2	14 kDa	0.047	0
Heterogeneous nuclear ribonucleoprotein L OS=Sus scrofa OX=9823 GN=HNRNPL PE=1 SV=2	tr|I3LPU8|I3LPU8_PIG	HNRNPL	P14866	29 kDa	0.047	0.1
MARCKS like 1 OS=Sus scrofa OX=9823 GN=MARCKSL1 PE=1 SV=2	tr|A0A287B4N8|A0A287B4N8_PIG	MARCKSL1	P49006	20 kDa	0.048	0
WW domain-binding protein 11 OS=Sus scrofa OX=9823 GN=WBP11 PE=1 SV=1	tr|A0A5G2QEI2|A0A5G2QEI2_PIG (+1)	WBP11	Q9Y2W2	70 kDa	0.048	0
Programmed cell death 4 OS=Sus scrofa OX=9823 GN=PDCD4 PE=1 SV=1	tr|A0A5G2QV27|A0A5G2QV27_PIG	PDCD4	Q53EL6	51 kDa	0.048	0.3
Golgi integral membrane protein 4 OS=Sus scrofa OX=9823 GN=GOLIM4 PE=4 SV=1	tr|A0A5G2R1A1|A0A5G2R1A1_PIG	GOLIM4	O00461	83 kDa	0.048	0.2
SWI/SNF related, matrix associated, actin dependent regulator of chromatin subfamily c member 2 OS=Sus scrofa OX=9823 GN=SMARCC2 PE=1 SV=3	tr|F1SM00|F1SM00_PIG	SMARCC2	Q8TAQ2	127 kDa	0.048	0.4
Septin 1 OS=Sus scrofa OX=9823 GN=SEPTIN1 PE=1 SV=1	tr|A0A287B551|A0A287B551_PIG (+1)	SEPTIN1	Q8WYJ6	50 kDa	0.049	0.2
CTP synthase OS=Sus scrofa OX=9823 GN=CTPS2 PE=1 SV=1	tr|A0A480TY64|A0A480TY64_PIG	CTPS2	Q9NRF8	69 kDa	0.049	0
Microtubule associated protein RP/EB family member 2 OS=Sus scrofa OX=9823 GN=MAPRE2 PE=1 SV=1	tr|A0A5G2QSA4|A0A5G2QSA4_PIG	MAPRE2	Q15555	51 kDa	0.049	0
Actin alpha 2 OS=Sus scrofa OX=9823 GN=ACTA2 PE=2 SV=1	tr|C7AI81|C7AI81_PIG	ACTA2	P62736	42 kDa	0.049	0
Uncharacterized protein OS=Sus scrofa OX=9823 GN=SRSF9 PE=1 SV=1	tr|F1RJJ0|F1RJJ0_PIG			26 kDa	0.049	0
Uncharacterized protein OS=Sus scrofa OX=9823 GN=CLASP2 PE=1 SV=4	tr|F1RRD7|F1RRD7_PIG			166 kDa	0.049	0.2
Uncharacterized protein OS=Sus scrofa OX=9823 GN=RAB8A PE=4 SV=3	tr|F2Z5I8|F2Z5I8_PIG			27 kDa	0.049	0.2
Folate receptor alpha OS=Sus scrofa OX=9823 GN=FOLR1 PE=1 SV=1	tr|I3LDJ1|I3LDJ1_PIG	FOLR1	P15328	33 kDa	0.049	0.6
Apolipoprotein R OS=Sus scrofa OX=9823 GN=APOR PE=1 SV=1	sp|Q03472|APOR_PIG	APOR	Q0VD83	23 kDa	0.05	0
Arylamine N-acetyltransferase 1 isoform b OS=Sus scrofa OX=9823 PE=1 SV=1	tr|A0A480RQR3|A0A480RQR3_PIG	AANAT	Q16613	40 kDa	0.05	0
DnaJ heat shock protein family (Hsp40) member C11 OS=Sus scrofa OX=9823 GN=DNAJC11 PE=1 SV=1	tr|A0A5G2QN68|A0A5G2QN68_PIG (+1)	DNAJC11	Q9NVH1	57 kDa	0.05	0
NAD(P)H-hydrate epimerase OS=Sus scrofa OX=9823 GN=NAXE PE=1 SV=1	tr|A0A5G2QPA8|A0A5G2QPA8_PIG	NAXE	Q8NCW5	42 kDa	0.05	0.5
15-hydroxyprostaglandin dehydrogenase OS=Sus scrofa OX=9823 GN=HPGD PE=1 SV=1	tr|D0G6X9|D0G6X9_PIG	HPGD	P15428	29 kDa	0.05	0
Interferon regulatory factor 3 OS=Sus scrofa OX=9823 GN=IRF3 PE=1 SV=1	sp|Q764M6|IRF3_PIG	IRF3	Q14653	47 kDa	0.051	0.2
Isoleucyl-tRNA synthetase OS=Sus scrofa OX=9823 GN=IARS PE=1 SV=1	tr|A0A287B3E7|A0A287B3E7_PIG (+1)	IARS	P41252	141 kDa	0.051	0.5
SERPIN domain-containing protein OS=Sus scrofa OX=9823 GN=SERPINA3-2 PE=1 SV=1	tr|A0A287B9R5|A0A287B9R5_PIG		Not present in human	47 kDa	0.051	2.1
COP9 signalosome subunit 8 OS=Sus scrofa OX=9823 GN=COPS8 PE=1 SV=1	tr|A0A5G2RIY7|A0A5G2RIY7_PIG	COPS8	Q99627	23 kDa	0.051	0.3
Saposin B-type domain-containing protein OS=Sus scrofa OX=9823 GN=CNPY2 PE=1 SV=1	tr|F1SLY7|F1SLY7_PIG	CNPY2	Q9Y2B0	21 kDa	0.051	0.5
Fibronectin 1 OS=Sus scrofa OX=9823 GN=FN1 PE=1 SV=1	tr|A0A286ZY95|A0A286ZY95_PIG	FN1	P02751	262 kDa	0.052	0.5
Ig-like domain-containing protein OS=Sus scrofa OX=9823 PE=4 SV=2	tr|A0A287AA42|A0A287AA42_PIG		Not present in human	15 kDa	0.052	4.5
Synaptojanin 2 binding protein OS=Sus scrofa OX=9823 GN=SYNJ2BP PE=1 SV=1	tr|A0A5G2Q9V3|A0A5G2Q9V3_PIG	SYNJ2BP	P57105	15 kDa	0.052	0.4
Rho-associated protein kinase OS=Sus scrofa OX=9823 GN=ROCK1 PE=1 SV=1	tr|A0A5G2QIS7|A0A5G2QIS7_PIG	ROCK1	Q13464	158 kDa	0.052	0
Obg-like ATPase 1 OS=Sus scrofa OX=9823 GN=OLA1 PE=1 SV=1	tr|A0A5G2RH83|A0A5G2RH83_PIG	OLA1	Q9NTK5	47 kDa	0.052	0.5
Isocitrate dehydrogenase [NAD] subunit, mitochondrial OS=Sus scrofa OX=9823 GN=IDH3G PE=1 SV=3	tr|F1S297|F1S297_PIG	IDH3G	P51553	41 kDa	0.052	0.2
ATP synthase subunit OS=Sus scrofa OX=9823 GN=ATP5MG PE=3 SV=2	tr|F1SAK7|F1SAK7_PIG	ATP5MG	P00846	11 kDa	0.052	0.3
Calponin-homology (CH) domain-containing protein OS=Sus scrofa OX=9823 GN=PARVG PE=4 SV=3	tr|F1SJU3|F1SJU3_PIG	PARVG	Q9HBI0	51 kDa	0.052	0
Activated leukocyte cell adhesion molecule OS=Sus scrofa OX=9823 GN=ALCAM PE=1 SV=5	tr|F1SL34|F1SL34_PIG	ALCAM	Q13740	61 kDa	0.052	0.5
40S ribosomal protein S26 OS=Sus scrofa OX=9823 GN=RPS26 PE=1 SV=4	sp|P49171|RS26_PIG	RPS26	P62854	13 kDa	0.053	0.3
UBIQUITIN_CONJUGAT_2 domain-containing protein OS=Sus scrofa OX=9823 GN=UBE2I PE=1 SV=1	tr|A0A287ASP8|A0A287ASP8_PIG	UBE2I	P63279	18 kDa	0.053	0.3
COMM domain containing 10 OS=Sus scrofa OX=9823 GN=COMMD10 PE=4 SV=1	tr|A0A287AYH8|A0A287AYH8_PIG	COMMD10	Q9Y6G5	23 kDa	0.053	0
DEAD (Asp-Glu-Ala-Asp) box helicase 21 OS=Sus scrofa OX=9823 GN=DDX21 PE=1 SV=3	tr|F1SUG7|F1SUG7_PIG	DDX21	Q9NR30	87 kDa	0.053	0.2
Histone H2A OS=Sus scrofa OX=9823 GN=HIST1H2AC PE=3 SV=1	tr|A0A287B959|A0A287B959_PIG	HIST1H2AC	A0A024R017	16 kDa	0.054	0.4
Uncharacterized protein OS=Sus scrofa OX=9823 GN=SMU1 PE=1 SV=2	tr|F2Z5D8|F2Z5D8_PIG			57 kDa	0.054	INF
Amine oxidase OS=Sus scrofa OX=9823 GN=LOC100520329 PE=1 SV=2	tr|A0A286ZI83|A0A286ZI83_PIG (+1)	MAOA	P21397	80 kDa	0.055	0.3
Acyl-CoA synthetase long chain family member 3 OS=Sus scrofa OX=9823 GN=ACSL3 PE=1 SV=1	tr|A0A287A6M3|A0A287A6M3_PIG (+1)	ACSL3	O95573	80 kDa	0.055	0.4
Membrane cofactor protein OS=Sus scrofa OX=9823 GN=CD46 PE=4 SV=1	tr|A0A287AH22|A0A287AH22_PIG	CD46	P15529	41 kDa	0.055	0.5
ADP/ATP translocase 3 OS=Sus scrofa OX=9823 GN=SLC25A6 PE=3 SV=1	tr|A0A287AXS7|A0A287AXS7_PIG	SLC25A6	P12236	33 kDa	0.055	0.5
Barrier to autointegration factor 1 OS=Sus scrofa OX=9823 GN=BANF1 PE=4 SV=1	tr|F1RU33|F1RU33_PIG	BANF1	O75531	10 kDa	0.055	1.7
Dehydrogenase/reductase 7B OS=Sus scrofa OX=9823 GN=DHRS7B PE=3 SV=1	tr|A0A286ZZM8|A0A286ZZM8_PIG (+2)	DHRS7B	Q6IAN0	35 kDa	0.056	0.1
Adenosine deaminase OS=Sus scrofa OX=9823 GN=ADA PE=1 SV=1	tr|A0A5G2QU98|A0A5G2QU98_PIG	ADA	P00813	41 kDa	0.056	0.3
Prohibitin OS=Sus scrofa OX=9823 GN=PHB PE=1 SV=3	tr|F2Z543|F2Z543_PIG	PHB	P35232	30 kDa	0.056	0.6
SERPIN domain-containing protein OS=Sus scrofa OX=9823 GN=SERPINH1 PE=1 SV=1	tr|A0A286ZRU9|A0A286ZRU9_PIG	SERPINH1	P50454	47 kDa	0.057	1.4
Peptidase S1 domain-containing protein OS=Sus scrofa OX=9823 GN=LOC100739080 PE=1 SV=2	tr|F1SGS2|F1SGS2_PIG		Not present in human	26 kDa	0.057	0
Nucleoside diphosphate kinase OS=Sus scrofa OX=9823 GN=NME3 PE=1 SV=3	tr|F1RG17|F1RG17_PIG	NME3	Q13232	19 kDa	0.058	0.2
Peptidyl arginine deiminase 4 OS=Sus scrofa OX=9823 GN=PADI4 PE=4 SV=4	tr|F1SUR0|F1SUR0_PIG	PADI4	Q9UM07	75 kDa	0.058	0
Epsin 1 OS=Sus scrofa OX=9823 GN=EPN1 PE=4 SV=1	tr|A0A286ZY48|A0A286ZY48_PIG	EPN1	Q9Y6I3	60 kDa	0.059	0.3
Sorbin and SH3 domain-containing protein 2 OS=Sus scrofa OX=9823 GN=SORBS2 PE=1 SV=1	tr|A0A287BKF4|A0A287BKF4_PIG	SORBS2	O94875	159 kDa	0.059	0.09
Cytochrome c oxidase subunit 5A OS=Sus scrofa OX=9823 GN=COX5A PE=1 SV=1	tr|F1SJ34|F1SJ34_PIG	COX5A	P20674	17 kDa	0.059	0.6
Vacuolar protein sorting 13 homolog C OS=Sus scrofa OX=9823 GN=VPS13C PE=4 SV=1	tr|A0A5G2QD22|A0A5G2QD22_PIG	VPS13C	Q709C8	423 kDa	0.06	INF
5'-nucleotidase ecto OS=Sus scrofa OX=9823 GN=NT5E PE=1 SV=1	tr|A0A5G2QXR8|A0A5G2QXR8_PIG	NT5E	P21589	57 kDa	0.06	0.2
Cytochrome c oxidase subunit OS=Sus scrofa OX=9823 GN=COX6B PE=1 SV=1	tr|A0A287A808|A0A287A808_PIG	COX6B	P14854	10 kDa	0.061	0.5
Sphingosine-1-phosphate lyase 1 OS=Sus scrofa OX=9823 GN=SGPL1 PE=1 SV=1	tr|A0A287AX55|A0A287AX55_PIG	SGPL1	O95470	67 kDa	0.061	0.2
Heterogeneous nuclear ribonucleoprotein F OS=Sus scrofa OX=9823 GN=HNRNPF PE=1 SV=1	tr|F1RG16|F1RG16_PIG	HNRNPF	P52597	46 kDa	0.061	0.8
Trifunctional enzyme subunit alpha, mitochondrial OS=Sus scrofa OX=9823 GN=HADHA PE=2 SV=1	sp|Q29554|ECHA_PIG	HADHA	P40939	83 kDa	0.062	0.6
Mothers against decapentaplegic homolog OS=Sus scrofa OX=9823 GN=SMAD2 PE=3 SV=1	tr|A0A287AE86|A0A287AE86_PIG (+2)	SMAD2	Q15796	52 kDa	0.062	0.2
Diaphanous related formin 2 OS=Sus scrofa OX=9823 GN=DIAPH2 PE=4 SV=1	tr|A0A5G2R9R5|A0A5G2R9R5_PIG (+2)	DIAPH2	O60879	125 kDa	0.062	0
Coiled-coil-helix-coiled-coil-helix domain-containing protein 2 OS=Sus scrofa OX=9823 GN=CHCHD2 PE=1 SV=2	tr|F1RIU9|F1RIU9_PIG	CHCHD2	Q9Y6H1	16 kDa	0.062	0.2
Cytosol aminopeptidase OS=Sus scrofa OX=9823 GN=LAP3 PE=1 SV=2	tr|I3LD43|I3LD43_PIG	LAP3	P28838	56 kDa	0.062	1.3
5'-AMP-activated protein kinase catalytic subunit alpha-1 (Fragments) OS=Sus scrofa OX=9823 GN=PRKAA1 PE=1 SV=2	sp|Q09136|AAPK1_PIG	PRKAA1	Q13131	44 kDa	0.063	0.2
BCL2 like 15 OS=Sus scrofa OX=9823 GN=BCL2L15 PE=1 SV=2	tr|A0A287ADT3|A0A287ADT3_PIG	BCL2L15	Q5TBC7	18 kDa	0.064	0
Proteasome subunit beta OS=Sus scrofa OX=9823 GN=PSMB10 PE=1 SV=1	tr|A0A287BRV0|A0A287BRV0_PIG	PSMB10	P40306	32 kDa	0.064	0.2
LIM zinc-binding domain-containing protein OS=Sus scrofa OX=9823 GN=LOC110258364 PE=4 SV=1	tr|A0A5G2QZZ3|A0A5G2QZZ3_PIG	LIMD1	Q9UGP4	9 kDa	0.064	0
NADH dehydrogenase ubiquinone iron-sulfur protein 3, mitochondrial OS=Sus scrofa OX=9823 GN=NDUFS3 PE=1 SV=1	tr|A0A286ZNN4|A0A286ZNN4_PIG	NDUFS3	O75489	30 kDa	0.066	0.5
Inter-alpha-trypsin inhibitor heavy chain H4 OS=Sus scrofa OX=9823 GN=ITIH4 PE=1 SV=1	tr|A0A5G2R7M3|A0A5G2R7M3_PIG	ITIH4	Q14624	102 kDa	0.066	2.6
Phosphopantothenoylcysteine synthetase OS=Sus scrofa OX=9823 GN=PPCS PE=1 SV=1	tr|F1SF93|F1SF93_PIG	PPCS	Q9HAB8	34 kDa	0.066	0.3
Uncharacterized protein OS=Sus scrofa OX=9823 PE=4 SV=2	tr|A0A286ZJL9|A0A286ZJL9_PIG			53 kDa	0.067	4.7
Eukaryotic translation initiation factor 2A OS=Sus scrofa OX=9823 GN=EIF2A PE=1 SV=2	tr|A0A286ZPR5|A0A286ZPR5_PIG (+1)	EIF2A	Q9BY44	62 kDa	0.067	0
Hydroxymethylbilane synthase OS=Sus scrofa OX=9823 GN=HMBS PE=1 SV=1	tr|A0SNU8|A0SNU8_PIG	HMBS	P08397	39 kDa	0.067	0.5
DEAD-box helicase 5 OS=Sus scrofa OX=9823 GN=DDX5 PE=3 SV=1	tr|A0A286ZM27|A0A286ZM27_PIG	DDX5	P17844	69 kDa	0.068	0.4
40S ribosomal protein S7 OS=Sus scrofa OX=9823 GN=RPS7 PE=1 SV=1	tr|A0A287A9Y6|A0A287A9Y6_PIG	RPS7	P62081	22 kDa	0.068	0.8
Reversion inducing cysteine rich protein with kazal motifs OS=Sus scrofa OX=9823 GN=RECK PE=1 SV=1	tr|A0A287AU65|A0A287AU65_PIG (+3)	RECK	O95980	99 kDa	0.068	0
Ubiquinol-cytochrome c reductase core protein 2 OS=Sus scrofa OX=9823 GN=UQCRC2 PE=1 SV=1	tr|A0A5G2REY8|A0A5G2REY8_PIG	UQCRC2	P22695	47 kDa	0.068	0.5
Uncharacterized protein OS=Sus scrofa OX=9823 GN=PZP PE=1 SV=2	tr|A0A287BN06|A0A287BN06_PIG			158 kDa	0.069	3.1
Nucleoporin 54 OS=Sus scrofa OX=9823 GN=NUP54 PE=1 SV=1	tr|A0A286ZTU0|A0A286ZTU0_PIG (+3)	NUP54	Q7Z3B4	56 kDa	0.07	0.3
SERPIN domain-containing protein OS=Sus scrofa OX=9823 GN=SERPINA3-2 PE=1 SV=1	tr|A0A287AT48|A0A287AT48_PIG		Not present in human	47 kDa	0.07	2.6
B-cell receptor-associated protein OS=Sus scrofa OX=9823 GN=BCAP31 PE=1 SV=2	tr|F1S2A8|F1S2A8_PIG	BCAP31	Q15185	28 kDa	0.07	0.5
AP2-associated protein kinase 1 OS=Sus scrofa OX=9823 GN=AAK1 PE=4 SV=1	tr|A0A5G2QJD9|A0A5G2QJD9_PIG	AAK1	Q2M2I8	141 kDa	0.072	0.2
Scaffold attachment factor B2 OS=Sus scrofa OX=9823 GN=SAFB2 PE=1 SV=1	tr|A0A5G2QXD1|A0A5G2QXD1_PIG	SAFB2	Q14151	111 kDa	0.072	0.4
Ubiquinol-cytochrome c reductase core protein 1 OS=Sus scrofa OX=9823 GN=UQCRC1 PE=1 SV=3	tr|F1SKM0|F1SKM0_PIG	UQCRC1	P31930	53 kDa	0.072	0.6
Charged multivesicular body protein 4B OS=Sus scrofa OX=9823 GN=CHMP4B PE=1 SV=3	tr|F1S4Z2|F1S4Z2_PIG	CHMP4B	Q9H444	25 kDa	0.073	0.2
Uncharacterized protein OS=Sus scrofa OX=9823 GN=VPS45 PE=1 SV=1	tr|A0A287APK1|A0A287APK1_PIG (+1)			62 kDa	0.074	0.3
J domain-containing protein OS=Sus scrofa OX=9823 GN=DNAJB1 PE=1 SV=1	tr|F1SCF5|F1SCF5_PIG	DNAJB1	P25685	38 kDa	0.074	0.5
C-type lectin domain-containing protein OS=Sus scrofa OX=9823 GN=LOC100625180 PE=1 SV=1	tr|A0A287B205|A0A287B205_PIG (+1)		Not present in human	28 kDa	0.075	0.2
Proteasome 26S subunit, ATPase 4 OS=Sus scrofa OX=9823 GN=PSMC4 PE=3 SV=1	tr|A0A287B4P8|A0A287B4P8_PIG	PSMC4	P43686	47 kDa	0.075	0.6
Sperm associated antigen 8 OS=Sus scrofa OX=9823 GN=SPAG8 PE=1 SV=2	tr|A0A287BA79|A0A287BA79_PIG	SPAG8	Q99932	33 kDa	0.075	0.2
Actin beta like 2 OS=Sus scrofa OX=9823 GN=ACTBL2 PE=1 SV=2	tr|A0A287A4R1|A0A287A4R1_PIG	ACTBL2	Q562R1	43 kDa	0.076	0.2
Actin binding LIM protein 1 OS=Sus scrofa OX=9823 GN=ABLIM1 PE=1 SV=4	tr|F1S4V5|F1S4V5_PIG	ABLIM1	O14639	94 kDa	0.077	0.3
Carrier domain-containing protein OS=Sus scrofa OX=9823 GN=FASN PE=1 SV=2	tr|I3LCW1|I3LCW1_PIG	FASN	P49327	64 kDa	0.077	0.5
Adaptor protein, phosphotyrosine interacting with PH domain and leucine zipper 2 OS=Sus scrofa OX=9823 GN=APPL2 PE=1 SV=1	tr|A0A287B924|A0A287B924_PIG (+2)	APPL2	Q8NEU8	71 kDa	0.078	0.2
Scavenger receptor class B member 2 OS=Sus scrofa OX=9823 GN=SCARB2 PE=1 SV=1	tr|A0A5G2QG17|A0A5G2QG17_PIG (+1)	SCARB2	Q14108	52 kDa	0.078	1.9
VPS18 core subunit of CORVET and HOPS complexes OS=Sus scrofa OX=9823 GN=VPS18 PE=1 SV=1	tr|F1SSU6|F1SSU6_PIG	VPS18	Q9P253	110 kDa	0.078	0.3
Tensin 2 OS=Sus scrofa OX=9823 GN=TNS2 PE=1 SV=3	tr|F1SGG0|F1SGG0_PIG	TNS2	Q63HR2	146 kDa	0.079	0.3
Calcineurin like EF-hand protein 1 OS=Sus scrofa OX=9823 GN=CHP1 PE=4 SV=3	tr|F1SSV2|F1SSV2_PIG	CHP1	Q99653	22 kDa	0.079	0.4
Uncharacterized protein OS=Sus scrofa OX=9823 GN=CYP2B22 PE=1 SV=2	tr|A0A287AT24|A0A287AT24_PIG			56 kDa	0.08	0.3
ANK_REP_REGION domain-containing protein OS=Sus scrofa OX=9823 GN=RAI14 PE=1 SV=1	tr|A0A5G2QRR7|A0A5G2QRR7_PIG	RAI14	Q9P0K7	106 kDa	0.08	0.4
Ubiquinone biosynthesis protein OS=Sus scrofa OX=9823 GN=COQ9 PE=1 SV=1	tr|A0A5G2QS58|A0A5G2QS58_PIG	COQ9	O75208	44 kDa	0.08	0.4
Elongation factor Tu OS=Sus scrofa OX=9823 GN=TUFM PE=1 SV=2	tr|F1RFI1|F1RFI1_PIG	TUFM	P49411	61 kDa	0.08	0.5
Eukaryotic translation initiation factor 2 subunit beta OS=Sus scrofa OX=9823 GN=EIF2S2 PE=4 SV=2	tr|F1S4Y8|F1S4Y8_PIG	EIF2S2	P20042	38 kDa	0.08	0.6
Anion exchange protein OS=Sus scrofa OX=9823 GN=SLC4A1 PE=1 SV=1	tr|K7GR72|K7GR72_PIG	SLC4A1	P02730	104 kDa	0.08	2
NAD(+) hydrolase SARM1 OS=Sus scrofa OX=9823 GN=SARM1 PE=2 SV=1	sp|I3L5V6|SARM1_PIG	SARM1	Q6SZW1	80 kDa	0.082	0.3
ATP synthase subunit gamma OS=Sus scrofa OX=9823 GN=ATP5F1C PE=3 SV=1	tr|A0A287AHM1|A0A287AHM1_PIG	ATP5F1C	P36542	33 kDa	0.082	0.6
LanC like 1 OS=Sus scrofa OX=9823 GN=LANCL1 PE=1 SV=2	tr|A0A287B283|A0A287B283_PIG	LANCL1	O43813	47 kDa	0.082	0.5
All-trans-retinol 13,14-reductase OS=Sus scrofa OX=9823 GN=RETSAT PE=1 SV=1	tr|F1SVB2|F1SVB2_PIG	RETSAT	Q6NUM9	67 kDa	0.082	0.2
Myotrophin OS=Sus scrofa OX=9823 GN=MTPN PE=1 SV=1	tr|K9IVW4|K9IVW4_PIG	MTPN	P58546	13 kDa	0.082	0.6
Autophagy-related protein 3 OS=Sus scrofa OX=9823 GN=ATG3 PE=1 SV=1	tr|A0A5G2QHY9|A0A5G2QHY9_PIG	ATG3	Q9NT62	34 kDa	0.083	2.8
Proteasome endopeptidase complex OS=Sus scrofa OX=9823 GN=PSMA5 PE=3 SV=2	tr|F2Z5K2|F2Z5K2_PIG	PSMA5	P28066	25 kDa	0.083	1.5
Histone H4 OS=Sus scrofa OX=9823 PE=1 SV=2	sp|P62802|H4_PIG	H4C1	P62805	11 kDa	0.084	1.6
Serine/arginine-rich splicing factor 1 OS=Sus scrofa OX=9823 GN=SRSF1 PE=2 SV=3	sp|Q3YLA6|SRSF1_PIG (+2)	SRSF1	Q07955	28 kDa	0.084	0.7
Complement factor I isoform 1 preproprotein OS=Sus scrofa OX=9823 GN=CFI PE=1 SV=1	tr|A0A287AQ20|A0A287AQ20_PIG	CFI	P05156	65 kDa	0.084	0
LPS responsive beige-like anchor protein OS=Sus scrofa OX=9823 GN=LRBA PE=1 SV=1	tr|A0A287AAK0|A0A287AAK0_PIG	LRBA	P50851	315 kDa	0.085	0.5
Sorcin OS=Sus scrofa OX=9823 GN=SRI PE=1 SV=1	tr|F1S340|F1S340_PIG	SRI	P30626	22 kDa	0.085	1.4
Prostaglandin reductase 3 isoform 1 OS=Sus scrofa OX=9823 GN=ZADH2 PE=1 SV=1	tr|A0A287A6F5|A0A287A6F5_PIG	ZADH2	Q8N4Q0	40 kDa	0.086	0.3
Pro-apoptotic WT1 regulator OS=Sus scrofa OX=9823 GN=PAWR PE=4 SV=2	tr|A0A287ARB3|A0A287ARB3_PIG	PAWR	Q96IZ0	36 kDa	0.086	0.1
Uncharacterized protein OS=Sus scrofa OX=9823 GN=GATD3A PE=1 SV=1	tr|A0A5G2R6F6|A0A5G2R6F6_PIG (+1)			29 kDa	0.086	0.5
Purine rich element binding protein A OS=Sus scrofa OX=9823 GN=PURA PE=1 SV=1	tr|A0A5G2RGK0|A0A5G2RGK0_PIG	PURA	Q00577	51 kDa	0.086	0.6
SERPIN domain-containing protein OS=Sus scrofa OX=9823 GN=SERPINA3-2 PE=1 SV=3	tr|F1SCD1|F1SCD1_PIG	SERPINA3	P01011	47 kDa	0.086	2.8
Dedicator of cytokinesis 6 OS=Sus scrofa OX=9823 GN=DOCK6 PE=3 SV=2	tr|A0A287AS50|A0A287AS50_PIG (+1)	DOCK6	Q96HP0	234 kDa	0.087	0.3
Kinectin 1 OS=Sus scrofa OX=9823 GN=KTN1 PE=1 SV=2	tr|F1SSN5|F1SSN5_PIG	KTN1	Q86UP2	157 kDa	0.087	0.7
Eukaryotic translation elongation factor 1 delta OS=Sus scrofa OX=9823 GN=EEF1D PE=4 SV=1	tr|A0A480KYX1|A0A480KYX1_PIG	EEF1D	P29692	65 kDa	0.088	0.6
Tubulin tyrosine ligase like 12 OS=Sus scrofa OX=9823 GN=TTLL12 PE=1 SV=4	tr|F1SJR7|F1SJR7_PIG	TTLL12	Q14166	66 kDa	0.088	0.6
Uncharacterized protein OS=Sus scrofa OX=9823 GN=ARPIN PE=1 SV=3	tr|F1SK02|F1SK02_PIG (+1)			25 kDa	0.088	7.5
SERPIN domain-containing protein OS=Sus scrofa OX=9823 GN=LOC106504547 PE=1 SV=1	tr|A0A287AGW0|A0A287AGW0_PIG (+1)		Not present in human	44 kDa	0.089	2.6
Pro-interleukin-16 OS=Sus scrofa OX=9823 GN=IL16 PE=4 SV=2	tr|A0A288CFU1|A0A288CFU1_PIG	IL16	Q14005	142 kDa	0.089	0.3
Muellerian-inhibiting factor OS=Sus scrofa OX=9823 GN=AMH PE=1 SV=1	tr|A0A5G2QS26|A0A5G2QS26_PIG	AMH	P03971	60 kDa	0.089	0.4
Secretory carrier-associated membrane protein OS=Sus scrofa OX=9823 GN=SCAMP3 PE=1 SV=2	tr|F1RLJ4|F1RLJ4_PIG	SCAMP3	O14828	38 kDa	0.089	0.5
Leiomodin 1 OS=Sus scrofa OX=9823 GN=LMOD1 PE=4 SV=2	tr|A0A286ZZD5|A0A286ZZD5_PIG	LMOD1	P29536	89 kDa	0.09	0.3
Cysteinyl-tRNA synthetase OS=Sus scrofa OX=9823 GN=CARS1 PE=1 SV=1	tr|A0A5G2R1B5|A0A5G2R1B5_PIG	CARS1	P49589	96 kDa	0.09	0.3
BMP binding endothelial regulator OS=Sus scrofa OX=9823 GN=BMPER PE=4 SV=1	tr|A0A5G2R299|A0A5G2R299_PIG (+2)	BMPER	Q8N8U9	69 kDa	0.091	0.3
Peptidylprolyl isomerase OS=Sus scrofa OX=9823 GN=FKBP3 PE=1 SV=2	tr|I3LR51|I3LR51_PIG	FKBP3	Q00688	29 kDa	0.091	0.6
Superoxide dismutase [Cu-Zn] OS=Sus scrofa OX=9823 GN=SOD1 PE=1 SV=2	sp|P04178|SODC_PIG	SOD1	P00441	16 kDa	0.093	1.5
Collagen type VI alpha 5 chain OS=Sus scrofa OX=9823 GN=COL6A5 PE=1 SV=2	tr|A0A287BK35|A0A287BK35_PIG	COL6A5	A8TX70	262 kDa	0.094	0.6
PDZ domain-containing protein OS=Sus scrofa OX=9823 GN=SCRIB PE=4 SV=2	tr|A0A287AZ68|A0A287AZ68_PIG	SCRIB	Q14160	100 kDa	0.095	0.3
Uncharacterized protein OS=Sus scrofa OX=9823 GN=NFKB1 PE=1 SV=2	tr|A0A287AVR3|A0A287AVR3_PIG			98 kDa	0.096	0.3
Protein kinase C substrate 80K-H OS=Sus scrofa OX=9823 GN=PRKCSH PE=1 SV=1	tr|A0A287B9A6|A0A287B9A6_PIG (+1)	PRKCSH	P14314	57 kDa	0.096	0.5
Protein THEMIS2 isoform 3 OS=Sus scrofa OX=9823 GN=THEMIS2 PE=4 SV=2	tr|I3LIN3|I3LIN3_PIG	THEMIS2	Q5TEJ8	78 kDa	0.096	0.4
Succinate--CoA ligase [GDP-forming] subunit beta, mitochondrial OS=Sus scrofa OX=9823 GN=SUCLG2 PE=3 SV=1	tr|A0A286ZWJ9|A0A286ZWJ9_PIG	SUCLG2	Q96I99	50 kDa	0.097	0.5
Non-secretory ribonuclease OS=Sus scrofa OX=9823 GN=LOC102163838 PE=3 SV=1	tr|A0A287AE25|A0A287AE25_PIG	RNASE2	P10153	18 kDa	0.097	0.3
3-hydroxyisobutyrate dehydrogenase OS=Sus scrofa OX=9823 GN=HIBADH PE=1 SV=1	tr|A0A5G2QR28|A0A5G2QR28_PIG	HIBADH	P31937	40 kDa	0.097	0.4
60S acidic ribosomal protein P0 OS=Sus scrofa OX=9823 GN=RPLP0 PE=1 SV=2	sp|Q29214|RLA0_PIG	RPLPO	P05388	34 kDa	0.098	0.7
Uncharacterized protein OS=Sus scrofa OX=9823 GN=LOC110255221 PE=3 SV=1	tr|A0A5G2QU73|A0A5G2QU73_PIG			19 kDa	0.098	0.2
Nucleoporin 214 OS=Sus scrofa OX=9823 GN=NUP214 PE=1 SV=2	tr|K7GLU3|K7GLU3_PIG	NUP214	P35658	194 kDa	0.098	0.2
Surfeit 4 OS=Sus scrofa OX=9823 GN=SURF4 PE=4 SV=1	tr|A0A286ZQW5|A0A286ZQW5_PIG	SURF4	O15260	30 kDa	0.099	0.6
Alanyl-tRNA synthetase OS=Sus scrofa OX=9823 GN=AARS1 PE=1 SV=4	tr|F1S431|F1S431_PIG	AARS1	P49588	107 kDa	0.099	0.5
Selenoprotein F OS=Sus scrofa OX=9823 GN=SELENOF PE=2 SV=2	sp|A1Z623|SEP15_PIG	SELENOF	O60613	18 kDa	0.1	0.3
Succinate dehydrogenase [ubiquinone] flavoprotein subunit, mitochondrial OS=Sus scrofa OX=9823 GN=SDHA PE=1 SV=2	sp|Q0QF01|SDHA_PIG (+1)	SDHA	P31040	73 kDa	0.1	0.5
Peroxiredoxin-2 OS=Sus scrofa OX=9823 GN=PRDX2 PE=1 SV=1	tr|A0A287A690|A0A287A690_PIG (+1)	PRDX2	P32119	26 kDa	0.1	1.5
Apoptotic chromatin condensation inducer 1 OS=Sus scrofa OX=9823 GN=ACIN1 PE=1 SV=2	tr|A0A287B6W8|A0A287B6W8_PIG	ACIN1	Q9UKV3	150 kDa	0.1	0.3
Cathepsin S OS=Sus scrofa OX=9823 GN=CTSS PE=1 SV=1	tr|A0A287BNW9|A0A287BNW9_PIG (+1)	CTSS	P25774	37 kDa	0.1	1.4
CDC42 effector protein 1 OS=Sus scrofa OX=9823 GN=CDC42EP1 PE=4 SV=1	tr|A0A480P3R5|A0A480P3R5_PIG	CDC42EP1	Q00587	39 kDa	0.1	0.1
Formin binding protein 1 OS=Sus scrofa OX=9823 GN=FNBP1 PE=1 SV=1	tr|A0A5G2QMK0|A0A5G2QMK0_PIG (+1)	FNBP1	Q96RU3	71 kDa	0.1	0.4
Amine oxidase OS=Sus scrofa OX=9823 GN=LOC110256000 PE=3 SV=1	tr|A0A5G2RI05|A0A5G2RI05_PIG	MAOA	P21397	83 kDa	0.1	2
Proteinase 3 OS=Sus scrofa OX=9823 GN=PRTN3 PE=1 SV=3	tr|F1S6S9|F1S6S9_PIG	PRTN3	P24158	29 kDa	0.1	1.7
C-type lectin domain family 3 member B OS=Sus scrofa OX=9823 GN=CLEC3B PE=1 SV=1	tr|F1SRC8|F1SRC8_PIG	CLEC3B	P05452	22 kDa	0.1	0.5
Calcium uniporter protein OS=Sus scrofa OX=9823 GN=MCU PE=1 SV=3	tr|F1SU78|F1SU78_PIG	MCU	Q8NE86	40 kDa	0.1	0.4
Grancalcin OS=Sus scrofa OX=9823 GN=GCA PE=1 SV=2	tr|I3LM99|I3LM99_PIG	GCA	P28676	33 kDa	0.1	0.3
Phosphatidylinositol 5-phosphate 4-kinase type-2 alpha OS=Sus scrofa OX=9823 GN=PIP4K2A PE=2 SV=1	sp|O13010|PI42A_PIG	PIP4K2A	P48426	46 kDa	0.11	0.6
40S ribosomal protein S21 OS=Sus scrofa OX=9823 GN=RPS21 PE=1 SV=1	sp|P63221|RS21_PIG	RPS21	P63220	9 kDa	0.11	0.6
E3 ubiquitin-protein ligase RNF114 OS=Sus scrofa OX=9823 GN=RNF114 PE=1 SV=1	sp|Q6J1I8|RN114_PIG	RNF114	Q9Y508	26 kDa	0.11	0.5
40S ribosomal protein S17 OS=Sus scrofa OX=9823 GN=RPS17 PE=1 SV=3	sp|Q6QAP7|RS17_PIG	RPS17	P08708	16 kDa	0.11	0.5
Solute carrier family 25 member 13 OS=Sus scrofa OX=9823 GN=SLC25A13 PE=1 SV=2	tr|A0A286ZKD4|A0A286ZKD4_PIG	SLC25A13	Q9UJS0	73 kDa	0.11	0.3
Peptidase, mitochondrial processing alpha subunit OS=Sus scrofa OX=9823 GN=PMPCA PE=1 SV=2	tr|A0A286ZRT5|A0A286ZRT5_PIG	PMPCA	Q10713	66 kDa	0.11	0.3
NADPH--cytochrome P450 reductase OS=Sus scrofa OX=9823 GN=POR PE=1 SV=1	tr|A0A286ZXA3|A0A286ZXA3_PIG	POR	P16435	88 kDa	0.11	0.5
Dynein light intermediate chain OS=Sus scrofa OX=9823 GN=DYNC1LI1 PE=1 SV=1	tr|A0A287AIW3|A0A287AIW3_PIG	DYNC1LI1	Q9Y6G9	57 kDa	0.11	0.4
Regulator of chromosome condensation 2 OS=Sus scrofa OX=9823 GN=RCC2 PE=1 SV=1	tr|A0A287ANK4|A0A287ANK4_PIG	RCC2	Q9P258	59 kDa	0.11	0.3
Uncharacterized protein OS=Sus scrofa OX=9823 GN=LOC100739163 PE=1 SV=2	tr|A0A287AZ91|A0A287AZ91_PIG			32 kDa	0.11	1.5
Myristoylated alanine rich protein kinase C substrate OS=Sus scrofa OX=9823 GN=MARCKS PE=1 SV=1	tr|A0A287BRL8|A0A287BRL8_PIG	MARCKS	P49006	32 kDa	0.11	0.4
MIA SH3 domain ER export factor 3 OS=Sus scrofa OX=9823 GN=MIA3 PE=1 SV=1	tr|A0A480RSB2|A0A480RSB2_PIG (+1)	MIA3	Q5JRA6	213 kDa	0.11	0.3
Uncharacterized protein OS=Sus scrofa OX=9823 GN=ICAM1 PE=1 SV=1	tr|A0A5G2Q6W7|A0A5G2Q6W7_PIG (+1)			58 kDa	0.11	0.5
Galactokinase 1 OS=Sus scrofa OX=9823 GN=GALK1 PE=1 SV=1	tr|A0A5G2QDU1|A0A5G2QDU1_PIG (+1)	GALK1	P51570	45 kDa	0.11	0.6
Fibrillin 2 OS=Sus scrofa OX=9823 GN=FBN2 PE=1 SV=1	tr|A0A5G2QM06|A0A5G2QM06_PIG	FBN2	P35556	314 kDa	0.11	0
Protein arginine N-methyltransferase 5 OS=Sus scrofa OX=9823 GN=PRMT5 PE=1 SV=1	tr|A0A5G2QRI8|A0A5G2QRI8_PIG (+1)	PRMT5	O14744	76 kDa	0.11	0.4
Heat shock protein family H (Hsp110) member 1 OS=Sus scrofa OX=9823 GN=HSPH1 PE=1 SV=1	tr|A0A5G2QV59|A0A5G2QV59_PIG	HSPH1	Q92598	97 kDa	0.11	0.3
Uncharacterized protein OS=Sus scrofa OX=9823 PE=1 SV=1	tr|A0A5G2QXT5|A0A5G2QXT5_PIG			54 kDa	0.11	1.9
Uncharacterized protein OS=Sus scrofa OX=9823 GN=LAMP1 PE=1 SV=1	tr|A0A5G2R3I8|A0A5G2R3I8_PIG			43 kDa	0.11	2.1
Uroporphyrinogen decarboxylase OS=Sus scrofa OX=9823 GN=UROD PE=1 SV=2	tr|F1S365|F1S365_PIG	UROD	P06132	41 kDa	0.11	0.5
Protein disulfide-isomerase OS=Sus scrofa OX=9823 GN=PDIA4 PE=1 SV=1	tr|F1SAD9|F1SAD9_PIG	PDIA4	P13667	73 kDa	0.11	0.6
Uncharacterized protein OS=Sus scrofa OX=9823 GN=PDLIM1 PE=4 SV=4	tr|F1SC51|F1SC51_PIG			53 kDa	0.11	0.6
NADH dehydrogenase [ubiquinone] 1 alpha subcomplex subunit 10, mitochondrial OS=Sus scrofa OX=9823 GN=NDUFA10 PE=1 SV=1	tr|F1SIS9|F1SIS9_PIG	NDUFA10	O95299	40 kDa	0.11	0.4
Fibrillarin OS=Sus scrofa OX=9823 GN=FBL PE=1 SV=3	tr|I3L5T3|I3L5T3_PIG	FBL	P22087	34 kDa	0.11	0.5
Tripeptidyl peptidase 1 OS=Sus scrofa OX=9823 GN=TPP1 PE=1 SV=1	tr|I3L812|I3L812_PIG	TPP1	O14773	62 kDa	0.11	0.6
Methionine aminopeptidase 2 OS=Sus scrofa OX=9823 GN=METAP2 PE=1 SV=2	tr|I3LSP1|I3LSP1_PIG	METAP2	P50579	53 kDa	0.11	0.5
Ribonuclease inhibitor OS=Sus scrofa OX=9823 GN=RNH1 PE=1 SV=1	sp|P10775|RINI_PIG	RNH1	P13489	49 kDa	0.12	0.7
N-acylglucosamine 2-epimerase OS=Sus scrofa OX=9823 GN=RENBP PE=1 SV=2	sp|P17560|RENBP_PIG	RENBP	P51606	46 kDa	0.12	0.5
Haptoglobin OS=Sus scrofa OX=9823 GN=HP PE=1 SV=1	sp|Q8SPS7|HPT_PIG (+1)	HP	P00738	38 kDa	0.12	1.9
Dicarbonyl and L-xylulose reductase OS=Sus scrofa OX=9823 GN=DCXR PE=4 SV=1	tr|A0A286ZQ44|A0A286ZQ44_PIG	DCXR	Q7Z4W1	26 kDa	0.12	0.6
Splicing factor 3a subunit 1 OS=Sus scrofa OX=9823 GN=SF3A1 PE=1 SV=1	tr|A0A287ACP7|A0A287ACP7_PIG	SF3A1	Q15459	81 kDa	0.12	0.5
Pre-mRNA processing factor 6 OS=Sus scrofa OX=9823 GN=PRPF6 PE=1 SV=1	tr|A0A287ATC4|A0A287ATC4_PIG	PRPF6	O94906	128 kDa	0.12	0.4
Protein numb homolog OS=Sus scrofa OX=9823 GN=NUMB PE=4 SV=2	tr|A0A287AZZ6|A0A287AZZ6_PIG	NUMB	P49757	66 kDa	0.12	0.4
Thioredoxin domain-containing protein OS=Sus scrofa OX=9823 GN=ERP44 PE=1 SV=1	tr|A0A287B4Y1|A0A287B4Y1_PIG (+2)	ERP44	Q9BS26	43 kDa	0.12	0.6
O-sialoglycoprotein endopeptidase OS=Sus scrofa OX=9823 GN=OSGEP PE=1 SV=1	tr|A0A287BL77|A0A287BL77_PIG (+1)	OSGEP	Q9NPF4	33 kDa	0.12	0.3
Aconitase 1 OS=Sus scrofa OX=9823 GN=ACO1 PE=1 SV=1	tr|A0A287BQT2|A0A287BQT2_PIG	ACO1	P21399	98 kDa	0.12	0.5
1,4-alpha-glucan branching enzyme 1 OS=Sus scrofa OX=9823 GN=GBE1 PE=1 SV=1	tr|A0A480PP98|A0A480PP98_PIG	GBE1	Q04446	81 kDa	0.12	0.3
Thioredoxin reductase 1, cytoplasmic OS=Sus scrofa OX=9823 GN=TXNRD1 PE=1 SV=1	tr|A0A5G2QJ21|A0A5G2QJ21_PIG	TXNRD1	Q16881	71 kDa	0.12	0.7
NOP2/Sun RNA methyltransferase 2 OS=Sus scrofa OX=9823 GN=NSUN2 PE=1 SV=1	tr|A0A5G2QRK5|A0A5G2QRK5_PIG (+1)	NSUN2	Q08J23	107 kDa	0.12	0.5
Aspartyl aminopeptidase OS=Sus scrofa OX=9823 GN=DNPEP PE=1 SV=1	tr|A0A5G2R9H6|A0A5G2R9H6_PIG	DNPEP	Q9ULA0	56 kDa	0.12	0.6
Coiled-coil domain containing 22 OS=Sus scrofa OX=9823 GN=CCDC22 PE=1 SV=1	tr|A0A5G2RD19|A0A5G2RD19_PIG	CCDC22	O60826	71 kDa	0.12	0.4
Pribosyltran domain-containing protein OS=Sus scrofa OX=9823 GN=APRT PE=1 SV=2	tr|F1S6K5|F1S6K5_PIG	APRT	P07741	26 kDa	0.12	0.6
Sorting nexin OS=Sus scrofa OX=9823 GN=SNX5 PE=1 SV=3	tr|F1SBI1|F1SBI1_PIG	SNX5	Q9Y5X3	47 kDa	0.12	0.5
DnaJ homolog subfamily A member 1 isoform 1 OS=Sus scrofa OX=9823 GN=DNAJA1 PE=1 SV=1	tr|F1SE73|F1SE73_PIG	DNAJA1	P31689	45 kDa	0.12	0.6
Endoplasmic reticulum-Golgi intermediate compartment protein 1 isoform X2 OS=Sus scrofa OX=9823 GN=ERGIC1 PE=1 SV=2	tr|F1SJY1|F1SJY1_PIG	ERGIC1	Q969X5	33 kDa	0.12	0.6
G protein subunit beta 2 OS=Sus scrofa OX=9823 GN=GNB2 PE=1 SV=3	tr|F2Z4Z8|F2Z4Z8_PIG	GNB2	P62879	37 kDa	0.12	0.6
40S ribosomal protein S3a OS=Sus scrofa OX=9823 GN=RPS3A PE=1 SV=1	tr|F2Z5C7|F2Z5C7_PIG	RPS3A	P61247	30 kDa	0.12	0.7
Transcription factor BTF3 OS=Sus scrofa OX=9823 GN=BTF3 PE=1 SV=3	tr|F2Z5H8|F2Z5H8_PIG	BTF3	P20290	21 kDa	0.12	0.5
Serine/arginine repetitive matrix 2 OS=Sus scrofa OX=9823 GN=SRRM2 PE=4 SV=2	tr|I3LCW3|I3LCW3_PIG	SRRM2	Q9UQ35	287 kDa	0.12	0.3
MHC class II antigen OS=Sus scrofa OX=9823 GN=SLA-DRA1 PE=1 SV=1	tr|Q85ZW4|Q85ZW4_PIG	HLA-DRB1	P01911	28 kDa	0.12	1.6
Malate dehydrogenase, mitochondrial OS=Sus scrofa OX=9823 GN=MDH2 PE=1 SV=2	sp|P00346|MDHM_PIG	MDH2	P40926	36 kDa	0.13	0.8
Apolipoprotein E OS=Sus scrofa OX=9823 GN=APOE PE=1 SV=2	sp|P18650|APOE_PIG	APOE	P02649	37 kDa	0.13	1.8
Gamma-interferon-inducible protein 16 isoform 1 OS=Sus scrofa OX=9823 PE=1 SV=1	tr|A0A286ZSP8|A0A286ZSP8_PIG (+2)	IFI16	Q16666	66 kDa	0.13	5.9
Sequestosome 1 OS=Sus scrofa OX=9823 GN=SQSTM1 PE=4 SV=1	tr|A0A286ZYR0|A0A286ZYR0_PIG	SQSTM1	Q13501	47 kDa	0.13	0.2
Dihydrofolate reductase OS=Sus scrofa OX=9823 GN=DHFR PE=3 SV=1	tr|A0A287ABU6|A0A287ABU6_PIG	DHFR	P00374	22 kDa	0.13	0.2
Interferon regulatory factor 2 binding protein 2 OS=Sus scrofa OX=9823 GN=IRF2BP2 PE=4 SV=1	tr|A0A287AKG8|A0A287AKG8_PIG	IRF2BP2	Q7Z5L9	61 kDa	0.13	0.2
Tubulointerstitial nephritis antigen like 1 OS=Sus scrofa OX=9823 GN=TINAGL1 PE=1 SV=1	tr|A0A287ANT6|A0A287ANT6_PIG	TINAGL1	Q9GZM7	52 kDa	0.13	0.5
SERPIN domain-containing protein OS=Sus scrofa OX=9823 GN=SERPINA3-2 PE=1 SV=2	tr|A0A287ARJ8|A0A287ARJ8_PIG		Not present in human	51 kDa	0.13	5.2
TPD52 like 2 OS=Sus scrofa OX=9823 GN=TPD52L2 PE=1 SV=2	tr|A0A287B1X5|A0A287B1X5_PIG	TPD52L2	O43399	23 kDa	0.13	1.5
Isoamyl acetate hydrolyzing esterase 1 (putative) OS=Sus scrofa OX=9823 GN=IAH1 PE=1 SV=1	tr|A0A287BPE6|A0A287BPE6_PIG	IAH1	Q2TAA2	27 kDa	0.13	0.5
RUN and FYVE domain containing 1 OS=Sus scrofa OX=9823 GN=RUFY1 PE=1 SV=1	tr|A0A5G2QEU1|A0A5G2QEU1_PIG	RUFY1	Q96T51	79 kDa	0.13	0.2
Staphylococcal nuclease domain-containing protein OS=Sus scrofa OX=9823 GN=SND1 PE=1 SV=1	tr|A0A5G2QLY5|A0A5G2QLY5_PIG	SND1	Q7KZF4	102 kDa	0.13	0.6
Pulmonary surfactant-associated protein A OS=Sus scrofa OX=9823 GN=SFTPA1 PE=4 SV=1	tr|A0A5G2QQ84|A0A5G2QQ84_PIG	SFTPA1	Q8IWL2	33 kDa	0.13	2.2
Prostaglandin E synthase 3 OS=Sus scrofa OX=9823 GN=PTGES3 PE=1 SV=1	tr|A0A5G2QTM2|A0A5G2QTM2_PIG (+1)	PTGES3	Q15185	16 kDa	0.13	0.5
Dihydropteridine reductase OS=Sus scrofa OX=9823 GN=QDPR PE=4 SV=1	tr|A0A5G2QZN1|A0A5G2QZN1_PIG	QDPR	P09417	22 kDa	0.13	0.3
Eosinophil peroxidase OS=Sus scrofa OX=9823 GN=EPX PE=1 SV=4	tr|F1RSB4|F1RSB4_PIG	EPX	P11678	80 kDa	0.13	0.04
Signal recognition particle subunit SRP72 OS=Sus scrofa OX=9823 GN=SRP72 PE=1 SV=3	tr|F1RTV6|F1RTV6_PIG	SRP72	O76094	73 kDa	0.13	0.5
Haloacid dehalogenase like hydrolase domain containing 2 OS=Sus scrofa OX=9823 GN=HDHD2 PE=4 SV=1	tr|F1RZX9|F1RZX9_PIG	HDHD2	Q9H0R4	28 kDa	0.13	0.6
Rho GTPase activating protein 4 OS=Sus scrofa OX=9823 GN=ARHGAP4 PE=4 SV=3	tr|F1S291|F1S291_PIG	ARHGAP4	P98171	105 kDa	0.13	0.2
Leucine rich pentatricopeptide repeat containing OS=Sus scrofa OX=9823 GN=LRPPRC PE=1 SV=2	tr|F1S5J1|F1S5J1_PIG	LRPPRC	P42704	159 kDa	0.13	0.6
Sulfhydryl oxidase OS=Sus scrofa OX=9823 GN=QSOX1 PE=1 SV=2	tr|F1S682|F1S682_PIG	QSOX1	O00391	81 kDa	0.13	0.5
Uncharacterized protein OS=Sus scrofa OX=9823 GN=NUCB2 PE=1 SV=2	tr|F1S9A4|F1S9A4_PIG			56 kDa	0.13	0.3
Protein transport protein SEC23 OS=Sus scrofa OX=9823 GN=SEC23B PE=1 SV=1	tr|F1SBH2|F1SBH2_PIG	SEC23B	Q15437	86 kDa	0.13	0.4
Uncharacterized protein OS=Sus scrofa OX=9823 GN=TPM2 PE=1 SV=2	tr|F1SG00|F1SG00_PIG			33 kDa	0.13	2.5
Nitrilase family member 2 OS=Sus scrofa OX=9823 GN=NIT2 PE=1 SV=3	tr|F1SKY2|F1SKY2_PIG	NIT2	Q9NQR4	31 kDa	0.13	0.5
Asporin OS=Sus scrofa OX=9823 GN=ASPN PE=1 SV=1	tr|F1SUE4|F1SUE4_PIG	ASPN	Q9BXN1	42 kDa	0.13	0.1
Lon protease homolog, mitochondrial OS=Sus scrofa OX=9823 GN=LONP1 PE=1 SV=2	tr|I3L7T4|I3L7T4_PIG	LONP1	P36776	107 kDa	0.13	0.5
D-aminoacyl-tRNA deacylase 2 OS=Sus scrofa OX=9823 GN=DTD2 PE=1 SV=1	tr|I3LU71|I3LU71_PIG	DTD2	Q96FN9	18 kDa	0.13	0.4
CDV3 homolog OS=Sus scrofa OX=9823 GN=CDV3 PE=1 SV=2	tr|I3LUE6|I3LUE6_PIG	CDV3	Q9UKY7	28 kDa	0.13	0.4
Microsomal glutathione S-transferase 3 OS=Sus scrofa OX=9823 GN=MGST3 PE=1 SV=1	tr|Q2EN77|Q2EN77_PIG	MGST3	O14880	17 kDa	0.13	0.5
Adenylosuccinate synthetase isozyme 2 OS=Sus scrofa OX=9823 GN=ADSS2 PE=2 SV=1	sp|A4Z6H1|PURA2_PIG	ADSS2	P30520	50 kDa	0.14	0.4
Hydroxyacyl-coenzyme A dehydrogenase, mitochondrial OS=Sus scrofa OX=9823 GN=HADH PE=1 SV=2	sp|P00348|HCDH_PIG	HADH	Q16836	34 kDa	0.14	0.8
Cathepsin D OS=Sus scrofa OX=9823 GN=CTSD PE=1 SV=2	sp|P00795|CATD_PIG	CTSD	P07339	37 kDa	0.14	INF
Citrate synthase, mitochondrial OS=Sus scrofa OX=9823 GN=CS PE=1 SV=2	sp|P00889|CISY_PIG	CS	O75390	52 kDa	0.14	INF
UDP-N-acetylglucosamine--peptide N-acetylglucosaminyltransferase 110 kDa subunit OS=Sus scrofa OX=9823 GN=OGT PE=2 SV=1	sp|Q27HV0|OGT1_PIG (+3)	OGT	O15294	117 kDa	0.14	0
Deoxyribonuclease-1-like 1 OS=Sus scrofa OX=9823 GN=DNASE1L1 PE=2 SV=1	sp|Q2QDF0|DNSL1_PIG (+1)	DNASE1L1	P49184	35 kDa	0.14	0
Peptidoglycan-recognition protein OS=Sus scrofa OX=9823 GN=PGLYRP1 PE=1 SV=1	tr|A0A286ZI97|A0A286ZI97_PIG	PGLYRP1	O75594	24 kDa	0.14	0.6
LUC7 like 3 pre-mRNA splicing factor OS=Sus scrofa OX=9823 GN=LUC7L3 PE=1 SV=2	tr|A0A286ZIG5|A0A286ZIG5_PIG (+1)	LUC7L3	O95232	73 kDa	0.14	0.4
PATJ crumbs cell polarity complex component OS=Sus scrofa OX=9823 GN=PATJ PE=4 SV=2	tr|A0A286ZKG0|A0A286ZKG0_PIG		Not present in human	210 kDa	0.14	0
Isocitrate dehydrogenase [NAD] subunit, mitochondrial OS=Sus scrofa OX=9823 GN=IDH3A PE=3 SV=2	tr|A0A286ZQY6|A0A286ZQY6_PIG	IDH3A	P50213	37 kDa	0.14	0.6
Kinesin light chain OS=Sus scrofa OX=9823 GN=KLC1 PE=1 SV=2	tr|A0A286ZWY6|A0A286ZWY6_PIG	KLC1	Q07866	70 kDa	0.14	0.4
Uncharacterized protein OS=Sus scrofa OX=9823 GN=C12H17orf49 PE=4 SV=2	tr|A0A286ZYN4|A0A286ZYN4_PIG (+1)			20 kDa	0.14	0
Ethylmalonyl-CoA decarboxylase 1 OS=Sus scrofa OX=9823 GN=ECHDC1 PE=1 SV=1	tr|A0A286ZZC3|A0A286ZZC3_PIG	ECHDC1	Q9NTX5	33 kDa	0.14	0.2
Uncharacterized protein OS=Sus scrofa OX=9823 GN=CPT1A PE=1 SV=1	tr|A0A286ZZX4|A0A286ZZX4_PIG (+1)			86 kDa	0.14	0
Protein tyrosine phosphatase receptor type M OS=Sus scrofa OX=9823 GN=PTPRM PE=4 SV=1	tr|A0A287A064|A0A287A064_PIG (+4)	PTPRM	P28827	169 kDa	0.14	INF
LIM domain and actin-binding protein 1 OS=Sus scrofa OX=9823 GN=LIMA1 PE=4 SV=2	tr|A0A287A2U9|A0A287A2U9_PIG (+1)	LIMA1	Q9UHB6	84 kDa	0.14	0.5
Mitochondrial Rho GTPase OS=Sus scrofa OX=9823 GN=RHOT1 PE=1 SV=1	tr|A0A287A323|A0A287A323_PIG	RHOT1	Q8IXI2	72 kDa	0.14	INF
GOLD domain-containing protein OS=Sus scrofa OX=9823 GN=TMED5 PE=1 SV=1	tr|A0A287A5G3|A0A287A5G3_PIG (+1)		Not present in human	26 kDa	0.14	INF
HSPA (Hsp70) binding protein 1 OS=Sus scrofa OX=9823 GN=HSPBP1 PE=1 SV=2	tr|A0A287A5U7|A0A287A5U7_PIG (+1)	HSPBP1	Q9NZL4	37 kDa	0.14	0
HECT and RLD domain containing E3 ubiquitin protein ligase 4 OS=Sus scrofa OX=9823 GN=HERC4 PE=4 SV=2	tr|A0A287A8M6|A0A287A8M6_PIG (+6)	HERC4	Q5GLZ8	122 kDa	0.14	0
Eukaryotic translation initiation factor 4 gamma 3 OS=Sus scrofa OX=9823 GN=EIF4G3 PE=1 SV=1	tr|A0A287AF76|A0A287AF76_PIG	EIF4G3	O43432	184 kDa	0.14	0
VPS51 subunit of GARP complex OS=Sus scrofa OX=9823 GN=VPS51 PE=1 SV=1	tr|A0A287AGP8|A0A287AGP8_PIG (+1)	VPS51	Q9UID3	86 kDa	0.14	0
Atlastin GTPase 2 OS=Sus scrofa OX=9823 GN=ATL2 PE=1 SV=2	tr|A0A287AMX6|A0A287AMX6_PIG (+1)	ATL2	Q8NHH9	63 kDa	0.14	0
Uncharacterized protein OS=Sus scrofa OX=9823 GN=TPM2 PE=3 SV=2	tr|A0A287AN33|A0A287AN33_PIG			40 kDa	0.14	0
Jupiter microtubule associated homolog 1 OS=Sus scrofa OX=9823 GN=JPT1 PE=1 SV=2	tr|A0A287ANU2|A0A287ANU2_PIG (+2)	JPT1	Q9UK76	18 kDa	0.14	0
Neural Wiskott-Aldrich syndrome protein OS=Sus scrofa OX=9823 GN=WASL PE=1 SV=1	tr|A0A287ATX4|A0A287ATX4_PIG (+2)	WASL	O00401	55 kDa	0.14	0
Vesicle associated membrane protein 5 OS=Sus scrofa OX=9823 GN=VAMP5 PE=1 SV=2	tr|A0A287AUN4|A0A287AUN4_PIG	VAMP5	O95183	13 kDa	0.14	0
RIC8 guanine nucleotide exchange factor A OS=Sus scrofa OX=9823 GN=RIC8A PE=4 SV=1	tr|A0A287AXY7|A0A287AXY7_PIG (+1)	RIC8A	Q9NPQ8	56 kDa	0.14	INF
Protein phosphatase, Mg2+/Mn2+ dependent 1G OS=Sus scrofa OX=9823 GN=PPM1G PE=1 SV=2	tr|A0A287B700|A0A287B700_PIG (+1)	PPM1G	O15355	55 kDa	0.14	0.2
Methylcrotonoyl-CoA carboxylase 2 OS=Sus scrofa OX=9823 GN=MCCC2 PE=1 SV=2	tr|A0A287B773|A0A287B773_PIG	MCCC2	Q9HCC0	61 kDa	0.14	0.3
ArfGAP with coiled-coil, ankyrin repeat and PH domains 2 OS=Sus scrofa OX=9823 GN=ACAP2 PE=1 SV=2	tr|A0A287BB96|A0A287BB96_PIG	ACAP2	Q15057	81 kDa	0.14	INF
TOR signaling pathway regulator OS=Sus scrofa OX=9823 GN=TIPRL PE=1 SV=1	tr|A0A287BCR7|A0A287BCR7_PIG	TIPRL	O75663	27 kDa	0.14	INF
Phosphoglycolate phosphatase OS=Sus scrofa OX=9823 GN=PGP PE=1 SV=1	tr|A0A287BDT8|A0A287BDT8_PIG	PGP	A6NDG6	34 kDa	0.14	0
BRISC and BRCA1 A complex member 2 OS=Sus scrofa OX=9823 GN=BABAM2 PE=1 SV=1	tr|A0A287BEJ2|A0A287BEJ2_PIG	BABAM2	Q9NXR7	44 kDa	0.14	0
Dystrobrevin OS=Sus scrofa OX=9823 GN=DTNA PE=1 SV=2	tr|A0A287BEJ8|A0A287BEJ8_PIG	DTNA	Q9Y4J8	79 kDa	0.14	0
Hypoxia up-regulated 1 OS=Sus scrofa OX=9823 GN=HYOU1 PE=1 SV=1	tr|A0A287BGS6|A0A287BGS6_PIG	HYOU1	Q9Y4L1	109 kDa	0.14	0.6
SERPIN domain-containing protein OS=Sus scrofa OX=9823 GN=SERPINA3-2 PE=1 SV=1	tr|A0A287BH21|A0A287BH21_PIG		Not present in human	52 kDa	0.14	3.5
Phosphatase domain containing paladin 1 OS=Sus scrofa OX=9823 GN=PALD1 PE=4 SV=2	tr|A0A287BIB2|A0A287BIB2_PIG	PALD1	Q9ULE6	96 kDa	0.14	INF
ER membrane protein complex subunit 2 OS=Sus scrofa OX=9823 GN=EMC2 PE=1 SV=1	tr|A0A287BIY5|A0A287BIY5_PIG (+3)	EMC2	Q15006	33 kDa	0.14	INF
Epidermal growth factor receptor pathway substrate 8 OS=Sus scrofa OX=9823 GN=EPS8 PE=1 SV=1	tr|A0A287BJX5|A0A287BJX5_PIG	EPS8	Q12929	93 kDa	0.14	0
Cadherin 6 OS=Sus scrofa OX=9823 GN=CDH6 PE=1 SV=2	tr|A0A287BKZ4|A0A287BKZ4_PIG	CDH6	P55285	88 kDa	0.14	0.2
SERPIN domain-containing protein OS=Sus scrofa OX=9823 GN=LOC396684 PE=3 SV=1	tr|A0A287BM11|A0A287BM11_PIG (+1)		G3V5I3	45 kDa	0.14	12
Nucleoporin 43 OS=Sus scrofa OX=9823 GN=NUP43 PE=1 SV=1	tr|A0A287BM32|A0A287BM32_PIG (+1)	NUP43	Q8NFH3	42 kDa	0.14	0
Ubiquitin-like domain-containing CTD phosphatase 1 OS=Sus scrofa OX=9823 GN=UBLCP1 PE=1 SV=1	tr|A0A287BNL3|A0A287BNL3_PIG (+1)	UBLCP1	Q8WVY7	37 kDa	0.14	INF
Collagen type V alpha 2 chain OS=Sus scrofa OX=9823 GN=COL5A2 PE=1 SV=2	tr|A0A287BPM1|A0A287BPM1_PIG	COL5A2	P05997	142 kDa	0.14	0
Sorbin and SH3 domain containing 1 OS=Sus scrofa OX=9823 GN=SORBS1 PE=1 SV=2	tr|A0A287BPW9|A0A287BPW9_PIG	SORBS1	Q9BX66	144 kDa	0.14	0.5
Uncharacterized protein OS=Sus scrofa OX=9823 GN=ZBP1 PE=1 SV=1	tr|A0A288CFW7|A0A288CFW7_PIG			46 kDa	0.14	0.3
SET and MYND domain-containing protein 5 isoform X1 OS=Sus scrofa OX=9823 GN=SMYD5 PE=1 SV=1	tr|A0A480ETD9|A0A480ETD9_PIG	SMYD5	Q6GMV2	66 kDa	0.14	INF
Somatomedin B and thrombospondin type 1 domain containing OS=Sus scrofa OX=9823 GN=SBSPON PE=1 SV=1	tr|A0A480WBM1|A0A480WBM1_PIG	SBSPON	Q8IVN8	29 kDa	0.14	0
Apolipoprotein A-II preproprotein OS=Sus scrofa OX=9823 GN=APOA2 PE=1 SV=1	tr|A0A481BCM9|A0A481BCM9_PIG	APOA2	P02647	11 kDa	0.14	INF
Alpha-2-macroglobulin OS=Sus scrofa OX=9823 GN=A2M PE=1 SV=1	tr|A0A5G2Q8I9|A0A5G2Q8I9_PIG (+1)	A2M	P01023	164 kDa	0.14	2.2
EMAP like 1 OS=Sus scrofa OX=9823 GN=EML1 PE=1 SV=1	tr|A0A5G2Q8W0|A0A5G2Q8W0_PIG	EML1	O00423	99 kDa	0.14	0
Cysteine rich protein 2 OS=Sus scrofa OX=9823 GN=CRIP2 PE=4 SV=1	tr|A0A5G2QBE4|A0A5G2QBE4_PIG	CRIP2	P52943	30 kDa	0.14	0
Exocyst complex component 5 OS=Sus scrofa OX=9823 GN=EXOC5 PE=1 SV=1	tr|A0A5G2QDG7|A0A5G2QDG7_PIG	EXOC5	O00471	89 kDa	0.14	INF
1-acyl-sn-glycerol-3-phosphate acyltransferase OS=Sus scrofa OX=9823 GN=AGPAT1 PE=1 SV=1	tr|A0A5G2QHZ8|A0A5G2QHZ8_PIG (+1)	AGPAT1	Q99943	32 kDa	0.14	INF
Tropomyosin alpha-3 chain OS=Sus scrofa OX=9823 GN=TPM3 PE=1 SV=1	tr|A0A5G2QIK0|A0A5G2QIK0_PIG	TPM3	P06753	31 kDa	0.14	1.7
Phosphate cytidylyltransferase 1, choline, alpha OS=Sus scrofa OX=9823 GN=PCYT1A PE=1 SV=1	tr|A0A5G2QIR1|A0A5G2QIR1_PIG	PCYT1A	P49585	54 kDa	0.14	INF
Inter-alpha-trypsin inhibitor heavy chain 3 OS=Sus scrofa OX=9823 GN=ITIH3 PE=1 SV=1	tr|A0A5G2QKR9|A0A5G2QKR9_PIG (+1)	ITIH3	Q06033	97 kDa	0.14	0
3-hydroxyisobutyrate dehydrogenase OS=Sus scrofa OX=9823 GN=HIBADH PE=1 SV=1	tr|A0A5G2QKU9|A0A5G2QKU9_PIG	HIBADH	P31937	33 kDa	0.14	0.4
Uncharacterized protein OS=Sus scrofa OX=9823 GN=DHRS11 PE=1 SV=1	tr|A0A5G2QKV4|A0A5G2QKV4_PIG (+1)			36 kDa	0.14	0.4
Laminin subunit beta 1 OS=Sus scrofa OX=9823 GN=LAMB1 PE=1 SV=1	tr|A0A5G2QKZ6|A0A5G2QKZ6_PIG (+1)	LAMB1	P07942	195 kDa	0.14	0.5
GB1/RHD3-type G domain-containing protein OS=Sus scrofa OX=9823 GN=GBP1 PE=1 SV=1	tr|A0A5G2QMY2|A0A5G2QMY2_PIG	GBP1	P32455	68 kDa	0.14	0
Ankyrin repeat and sterile alpha motif domain containing 1A OS=Sus scrofa OX=9823 GN=ANKS1A PE=1 SV=1	tr|A0A5G2QPU6|A0A5G2QPU6_PIG (+1)	ANKS1A	Q92625	126 kDa	0.14	0
Arrestin beta 2 OS=Sus scrofa OX=9823 GN=ARRB2 PE=1 SV=1	tr|A0A5G2QR25|A0A5G2QR25_PIG	ARRB2	P32121	55 kDa	0.14	INF
Ficolin-1 OS=Sus scrofa OX=9823 GN=FCN1 PE=4 SV=1	tr|A0A5G2QR79|A0A5G2QR79_PIG	FCN1	O00602	32 kDa	0.14	0
Ras-related GTP-binding protein OS=Sus scrofa OX=9823 GN=RRAGC PE=1 SV=1	tr|A0A5G2QU64|A0A5G2QU64_PIG	RRAGC	Q9HB90	47 kDa	0.14	INF
NIMA related kinase 9 OS=Sus scrofa OX=9823 GN=NEK9 PE=4 SV=1	tr|A0A5G2QV66|A0A5G2QV66_PIG (+1)	NEK9	Q8TD19	121 kDa	0.14	0
Pleckstrin homology domain containing A5 OS=Sus scrofa OX=9823 GN=PLEKHA5 PE=1 SV=1	tr|A0A5G2QWU0|A0A5G2QWU0_PIG	PLEKHA5	Q9HAU0	146 kDa	0.14	0
RB binding protein 7, chromatin remodeling factor OS=Sus scrofa OX=9823 GN=RBBP7 PE=1 SV=1	tr|A0A5G2QYY5|A0A5G2QYY5_PIG	RBBP7	Q16576	50 kDa	0.14	0
Peptidylprolyl isomerase OS=Sus scrofa OX=9823 GN=FKBP10 PE=1 SV=1	tr|A0A5G2R1T0|A0A5G2R1T0_PIG	FKBP10	Q96AY3	64 kDa	0.14	0
DnaJ heat shock protein family (Hsp40) member C8 OS=Sus scrofa OX=9823 GN=DNAJC8 PE=1 SV=1	tr|A0A5G2R2L7|A0A5G2R2L7_PIG	DNAJC8	O75937	34 kDa	0.14	INF
Uncharacterized protein OS=Sus scrofa OX=9823 GN=PDIA6 PE=1 SV=1	tr|A0A5G2R6R2|A0A5G2R6R2_PIG (+1)			48 kDa	0.14	0.7
Stomatin OS=Sus scrofa OX=9823 GN=STOM PE=4 SV=1	tr|A0A5G2R6Z7|A0A5G2R6Z7_PIG	STOM	P27105	13 kDa	0.14	0
Pescadillo homolog OS=Sus scrofa OX=9823 GN=PES1 PE=3 SV=1	tr|A0A5G2RBM8|A0A5G2RBM8_PIG (+1)	PES1	O00541	65 kDa	0.14	0
MAPK activated protein kinase 3 OS=Sus scrofa OX=9823 GN=MAPKAPK3 PE=3 SV=1	tr|A0A5K1UJP6|A0A5K1UJP6_PIG	MAPKAPK3	Q16644	39 kDa	0.14	0
Density-regulated protein OS=Sus scrofa OX=9823 GN=DENR PE=1 SV=3	tr|F1REW9|F1REW9_PIG	DENR	O43583	22 kDa	0.14	0
PDZ and LIM domain 4 OS=Sus scrofa OX=9823 GN=PDLIM4 PE=1 SV=3	tr|F1RJV5|F1RJV5_PIG	PDLIM4	P50479	36 kDa	0.14	0
Translocase of outer mitochondrial membrane 40 OS=Sus scrofa OX=9823 GN=TOMM40 PE=4 SV=4	tr|F1RM44|F1RM44_PIG	TOMM40	O96008	35 kDa	0.14	4.4
Apoptosis inducing factor mitochondria associated 1 OS=Sus scrofa OX=9823 GN=AIFM1 PE=1 SV=1	tr|F1RTH3|F1RTH3_PIG	AIFM1	O95831	67 kDa	0.14	0.4
Aryl hydrocarbon receptor interacting protein OS=Sus scrofa OX=9823 GN=AIP PE=1 SV=1	tr|F1RUZ6|F1RUZ6_PIG	AIP	O00170	38 kDa	0.14	0.2
Factor VIII intron 22 protein OS=Sus scrofa OX=9823 GN=F8A1 PE=1 SV=1	tr|F1RZ35|F1RZ35_PIG	F8A1	P23610	41 kDa	0.14	0
Peptidyl-tRNA hydrolase 2 OS=Sus scrofa OX=9823 GN=PTRH2 PE=1 SV=1	tr|F1S227|F1S227_PIG	PTRH2	Q9Y3E5	19 kDa	0.14	0
Peptidylprolyl isomerase OS=Sus scrofa OX=9823 GN=FKBP8 PE=1 SV=3	tr|F1S912|F1S912_PIG	FKBP8	Q14318	45 kDa	0.14	0
Vacuolar protein sorting-associated protein 11 homolog OS=Sus scrofa OX=9823 GN=VPS11 PE=1 SV=2	tr|F1SAH7|F1SAH7_PIG	VPS11	Q9H270	108 kDa	0.14	0
Phenylalanine--tRNA ligase alpha subunit OS=Sus scrofa OX=9823 GN=FARSA PE=1 SV=3	tr|F1SD97|F1SD97_PIG	FARSA	Q9Y285	58 kDa	0.14	0.6
Transportin 2 OS=Sus scrofa OX=9823 GN=TNPO2 PE=4 SV=4	tr|F1SEX5|F1SEX5_PIG	TNPO2	O14787	103 kDa	0.14	INF
CTAGE family member 5 isoform 8 OS=Sus scrofa OX=9823 GN=MIA2 PE=1 SV=3	tr|F1SIR4|F1SIR4_PIG	MIA2	Q96PC5	159 kDa	0.14	0
NADH:ubiquinone oxidoreductase subunit A9 OS=Sus scrofa OX=9823 GN=NDUFA9 PE=1 SV=3	tr|F1SL07|F1SL07_PIG	NDUFA9	Q16795	46 kDa	0.14	0.5
WD repeat domain 91 OS=Sus scrofa OX=9823 GN=WDR91 PE=1 SV=3	tr|F1SNI1|F1SNI1_PIG	WDR91	A4D1P6	83 kDa	0.14	INF
Galactosidase beta 1 like OS=Sus scrofa OX=9823 GN=GLB1L PE=3 SV=3	tr|F1SR82|F1SR82_PIG	GLB1L	Q6UWU2	74 kDa	0.14	INF
Anoctamin OS=Sus scrofa OX=9823 GN=ANO10 PE=1 SV=3	tr|F1SRD2|F1SRD2_PIG	ANO10	Q9NW15	76 kDa	0.14	0
1-phosphatidylinositol 4,5-bisphosphate phosphodiesterase OS=Sus scrofa OX=9823 GN=PLCB2 PE=4 SV=3	tr|F1SS34|F1SS34_PIG	PLCB2	Q9NQ67	132 kDa	0.14	0
RAN binding protein 2 OS=Sus scrofa OX=9823 GN=RANBP2 PE=1 SV=4	tr|F1SU29|F1SU29_PIG (+1)	RANBP2	P49792	354 kDa	0.14	0.5
EF-hand domain-containing protein OS=Sus scrofa OX=9823 GN=S100A9 PE=1 SV=1	tr|F6Q697|F6Q697_PIG	S100A9	P06702	13 kDa	0.14	2
Procollagen C-endopeptidase enhancer OS=Sus scrofa OX=9823 GN=PCOLCE PE=1 SV=1	tr|I3LEE6|I3LEE6_PIG	PCOLCE	Q15113	50 kDa	0.14	0
Ribosome binding protein 1 OS=Sus scrofa OX=9823 GN=RRBP1 PE=1 SV=2	tr|I3LGC2|I3LGC2_PIG	RRBP1	Q9P2E9	161 kDa	0.14	0.7
Polyhomeotic homolog 2 OS=Sus scrofa OX=9823 GN=PHC2 PE=1 SV=2	tr|I3LIR0|I3LIR0_PIG	PHC2	Q8IXK0	94 kDa	0.14	0
UBX domain-containing protein OS=Sus scrofa OX=9823 GN=UBXN7 PE=1 SV=2	tr|I3LQY9|I3LQY9_PIG	UBXN7	O94888	58 kDa	0.14	0
Proteoglycan 3 OS=Sus scrofa OX=9823 GN=LOC100625180 PE=1 SV=2	tr|I3LV61|I3LV61_PIG	PRG3	Q9Y2Y8	26 kDa	0.14	0.3
Multiple coagulation factor deficiency 2 OS=Sus scrofa OX=9823 GN=MCFD2 PE=1 SV=3	tr|K7GQY4|K7GQY4_PIG	MCFD2	Q8NI22	26 kDa	0.14	0
RHOB OS=Sus scrofa OX=9823 GN=RHOB PE=1 SV=1	tr|Q06AT8|Q06AT8_PIG	RHOB	P62745	22 kDa	0.14	0
Tubulin beta chain OS=Sus scrofa OX=9823 PE=1 SV=1	sp|P02554|TBB_PIG	TUBB	P07437	50 kDa	0.15	0.4
SLA class II histocompatibility antigen, DQ haplotype C alpha chain OS=Sus scrofa OX=9823 PE=2 SV=1	sp|P15980|HA2C_PIG		Not present in human	28 kDa	0.15	3.7
SPARC OS=Sus scrofa OX=9823 GN=SPARC PE=1 SV=2	sp|P20112|SPRC_PIG	SPARC	P09486	34 kDa	0.15	0.5
Leukocyte cysteine proteinase inhibitor 1 OS=Sus scrofa OX=9823 PE=1 SV=1	sp|P35479|CPI1_PIG		Not present in human	12 kDa	0.15	0
ATP synthase subunit f, mitochondrial OS=Sus scrofa OX=9823 GN=ATP5MF PE=1 SV=4	sp|Q95339|ATPK_PIG	ATP5MF	P56134	10 kDa	0.15	0.6
Biglycan (Fragments) OS=Sus scrofa OX=9823 GN=BGN PE=2 SV=2	sp|Q9GKQ6|PGS1_PIG	BGN	P21810	30 kDa	0.15	0
RNA binding protein with serine rich domain 1 OS=Sus scrofa OX=9823 GN=RNPS1 PE=4 SV=2	tr|A0A286ZLK7|A0A286ZLK7_PIG (+2)	RNPS1	Q15287	25 kDa	0.15	0
Tubulin polymerization promoting protein OS=Sus scrofa OX=9823 GN=TPPP PE=1 SV=1	tr|A0A286ZLY5|A0A286ZLY5_PIG (+1)	TPPP	O94811	27 kDa	0.15	0
3-hydroxybutyrate dehydrogenase 2 OS=Sus scrofa OX=9823 GN=BDH2 PE=1 SV=1	tr|A0A286ZSA7|A0A286ZSA7_PIG (+1)	BDH2	Q9BUT1	26 kDa	0.15	0.5
Formin like 1 OS=Sus scrofa OX=9823 GN=FMNL1 PE=4 SV=1	tr|A0A286ZTB5|A0A286ZTB5_PIG	FMNL1	O95466	75 kDa	0.15	0
Splicing factor 3B subunit 3 OS=Sus scrofa OX=9823 GN=SF3B3 PE=1 SV=1	tr|A0A286ZVS0|A0A286ZVS0_PIG	SF3B3	Q15393	136 kDa	0.15	1.6
Component of oligomeric golgi complex 3 OS=Sus scrofa OX=9823 GN=COG3 PE=1 SV=1	tr|A0A286ZXR7|A0A286ZXR7_PIG (+1)	COG3	Q96JB2	91 kDa	0.15	0.4
2',3'-cyclic-nucleotide 3'-phosphodiesterase OS=Sus scrofa OX=9823 GN=CNP PE=3 SV=2	tr|A0A286ZZ12|A0A286ZZ12_PIG	CNP	P23582	47 kDa	0.15	0.6
ADP ribosylation factor 4 OS=Sus scrofa OX=9823 GN=ARF4 PE=1 SV=1	tr|A0A287A1M9|A0A287A1M9_PIG	ARF4	P18085	20 kDa	0.15	0
RAS p21 protein activator 1 OS=Sus scrofa OX=9823 GN=RASA1 PE=1 SV=2	tr|A0A287A3J8|A0A287A3J8_PIG (+4)	RASA1	P20936	107 kDa	0.15	0
Tyrosine-protein phosphatase non-receptor type 12 OS=Sus scrofa OX=9823 GN=PTPN12 PE=3 SV=1	tr|A0A287AF36|A0A287AF36_PIG	PTPN12	Q05209	85 kDa	0.15	0.4
Rho guanine nucleotide exchange factor 1 OS=Sus scrofa OX=9823 GN=ARHGEF1 PE=1 SV=2	tr|A0A287AJS0|A0A287AJS0_PIG	ARHGEF1	Q92888	132 kDa	0.15	0.4
Cytoskeleton associated protein 5 OS=Sus scrofa OX=9823 GN=CKAP5 PE=1 SV=1	tr|A0A287AK10|A0A287AK10_PIG	CKAP5	Q14008	230 kDa	0.15	0.4
Caspase 8 OS=Sus scrofa OX=9823 GN=CASP8 PE=3 SV=1	tr|A0A287AK16|A0A287AK16_PIG (+1)	CASP8	Q14790	46 kDa	0.15	0
Alpha-hemoglobin-stabilizing protein OS=Sus scrofa OX=9823 GN=AHSP PE=1 SV=1	tr|A0A287AK38|A0A287AK38_PIG	AHSP	Q9NZD4	11 kDa	0.15	0
RAB4A, member RAS oncogene family OS=Sus scrofa OX=9823 GN=RAB4A PE=1 SV=1	tr|A0A287AKG6|A0A287AKG6_PIG	RAB4A	P20338	24 kDa	0.15	INF
Heterogeneous nuclear ribonucleoprotein A2/B1 OS=Sus scrofa OX=9823 GN=HNRNPA2B1 PE=4 SV=1	tr|A0A287AW32|A0A287AW32_PIG	HNRNPA2B1	P22626	38 kDa	0.15	0.7
MAPK regulated corepressor interacting protein 1 OS=Sus scrofa OX=9823 GN=MCRIP1 PE=4 SV=2	tr|A0A287AWN1|A0A287AWN1_PIG (+1)	MCRIP1	C9JLW8	13 kDa	0.15	0
Leucine rich repeat containing 47 OS=Sus scrofa OX=9823 GN=LRRC47 PE=1 SV=1	tr|A0A287AYY7|A0A287AYY7_PIG	LRRC47	Q8N1G4	64 kDa	0.15	0.5
Double PHD fingers 2 OS=Sus scrofa OX=9823 GN=DPF2 PE=4 SV=2	tr|A0A287B2V5|A0A287B2V5_PIG (+1)	DPF2	Q92785	41 kDa	0.15	0
SAFB like transcription modulator OS=Sus scrofa OX=9823 GN=SLTM PE=1 SV=1	tr|A0A287B4G7|A0A287B4G7_PIG	SLTM	Q9NWH9	106 kDa	0.15	0
ICAM_N domain-containing protein OS=Sus scrofa OX=9823 GN=ICAM2 PE=1 SV=1	tr|A0A287B7Y4|A0A287B7Y4_PIG (+3)	ICAM2	P13598	35 kDa	0.15	INF
Uncharacterized protein OS=Sus scrofa OX=9823 GN=IGFBP7 PE=1 SV=2	tr|A0A287B8M8|A0A287B8M8_PIG			28 kDa	0.15	0
PYM homolog 1, exon junction complex associated factor OS=Sus scrofa OX=9823 GN=PYM1 PE=1 SV=2	tr|A0A287B9S4|A0A287B9S4_PIG	PYM1	Q9BRP8	29 kDa	0.15	0
Transcription factor BTF3 OS=Sus scrofa OX=9823 GN=BTF3L4 PE=1 SV=1	tr|A0A287BAG8|A0A287BAG8_PIG	BTF3L4	Q96K17	17 kDa	0.15	0.6
Polypyrimidine tract binding protein 3 OS=Sus scrofa OX=9823 GN=PTBP3 PE=1 SV=2	tr|A0A287BD22|A0A287BD22_PIG (+1)	PTBP3	O95758	54 kDa	0.15	0.2
Maestro heat like repeat family member 1 OS=Sus scrofa OX=9823 GN=MROH1 PE=4 SV=1	tr|A0A287BD47|A0A287BD47_PIG (+1)	MROH1	Q8NDA8	180 kDa	0.15	0
Golgi associated, gamma adaptin ear containing, ARF binding protein 3 OS=Sus scrofa OX=9823 GN=GGA3 PE=1 SV=1	tr|A0A287BF21|A0A287BF21_PIG	GGA3	Q9NZ52	79 kDa	0.15	0
Clathrin light chain OS=Sus scrofa OX=9823 GN=CLTA PE=3 SV=1	tr|A0A287BFJ2|A0A287BFJ2_PIG	CLTA	P09496	23 kDa	0.15	2.3
EGF containing fibulin extracellular matrix protein 2 OS=Sus scrofa OX=9823 GN=EFEMP2 PE=4 SV=2	tr|A0A287BIU2|A0A287BIU2_PIG	EFEMP2	O95967	54 kDa	0.15	0.5
PEST proteolytic signal containing nuclear protein OS=Sus scrofa OX=9823 GN=PCNP PE=1 SV=1	tr|A0A287BLB5|A0A287BLB5_PIG	PCNP	Q8WW12	19 kDa	0.15	INF
Neural cell adhesion molecule 1 OS=Sus scrofa OX=9823 GN=NCAM1 PE=1 SV=2	tr|A0A287BN02|A0A287BN02_PIG	NCAM1	P13591	119 kDa	0.15	0
Polyadenylate-binding protein OS=Sus scrofa OX=9823 GN=PABPC4 PE=1 SV=2	tr|A0A287BQ02|A0A287BQ02_PIG (+1)	PABPC4	Q13310	72 kDa	0.15	0
Tubulin gamma chain OS=Sus scrofa OX=9823 GN=TUBG1 PE=1 SV=1	tr|A0A480IMX3|A0A480IMX3_PIG	TUBG1	P23258	50 kDa	0.15	0.4
LLGL scribble cell polarity complex component 2 OS=Sus scrofa OX=9823 GN=LLGL2 PE=4 SV=1	tr|A0A5G2QEN0|A0A5G2QEN0_PIG	LLGL2	Q6P1M3	115 kDa	0.15	2.4
OS9 endoplasmic reticulum lectin OS=Sus scrofa OX=9823 GN=OS9 PE=4 SV=1	tr|A0A5G2QHT8|A0A5G2QHT8_PIG	OS9	Q13438	61 kDa	0.15	0
Uncharacterized protein OS=Sus scrofa OX=9823 GN=NECTIN2 PE=1 SV=1	tr|A0A5G2QNG4|A0A5G2QNG4_PIG			57 kDa	0.15	0
Flavodoxin_2 domain-containing protein OS=Sus scrofa OX=9823 GN=NQO1 PE=1 SV=1	tr|A0A5G2QPB5|A0A5G2QPB5_PIG (+3)	NQO1	P15559	31 kDa	0.15	0
Protein S100 OS=Sus scrofa OX=9823 GN=S100A11 PE=1 SV=1	tr|A0A5G2QQA2|A0A5G2QQA2_PIG	S100A11	P31949	13 kDa	0.15	1.4
Golgin B1 OS=Sus scrofa OX=9823 GN=GOLGB1 PE=1 SV=1	tr|A0A5G2QR43|A0A5G2QR43_PIG	GOLGB1	Q14789	368 kDa	0.15	0
Methylcrotonoyl-CoA carboxylase 2 OS=Sus scrofa OX=9823 GN=MCCC2 PE=1 SV=1	tr|A0A5G2QSH7|A0A5G2QSH7_PIG	MCCC2	Q9HCC0	54 kDa	0.15	0
Latent transforming growth factor beta binding protein 4 OS=Sus scrofa OX=9823 GN=LTBP4 PE=1 SV=1	tr|A0A5G2R0I5|A0A5G2R0I5_PIG	LTBP4	Q8N2S1	173 kDa	0.15	0.4
Phospholipase A2 activating protein OS=Sus scrofa OX=9823 GN=PLAA PE=1 SV=1	tr|A0A5G2R0I9|A0A5G2R0I9_PIG	PLAA	Q9Y263	114 kDa	0.15	0
Metallo-beta-lactamase domain containing 1 OS=Sus scrofa OX=9823 GN=MBLAC1 PE=4 SV=1	tr|A0A5G2R1J3|A0A5G2R1J3_PIG	MBLAC1	A4D2B0	29 kDa	0.15	0
Mitochondrial carrier 1 OS=Sus scrofa OX=9823 GN=MTCH1 PE=1 SV=1	tr|A0A5G2R805|A0A5G2R805_PIG (+1)	MTCH1	Q9NZJ7	41 kDa	0.15	4.3
Sec1 family domain containing 1 OS=Sus scrofa OX=9823 GN=SCFD1 PE=1 SV=1	tr|A0A5G2R8F9|A0A5G2R8F9_PIG	SCFD1	Q8WVM8	66 kDa	0.15	0.5
Ankyrin repeat domain 13A OS=Sus scrofa OX=9823 GN=ANKRD13A PE=1 SV=1	tr|A0A5G2RJ60|A0A5G2RJ60_PIG	ANKRD13A	Q8IZ07	68 kDa	0.15	0
Elongation factor like GTPase 1 OS=Sus scrofa OX=9823 GN=EFL1 PE=1 SV=1	tr|A0A5K1U2U1|A0A5K1U2U1_PIG	EFL1	Q7Z2Z2	125 kDa	0.15	0
Actin-related protein 2/3 complex subunit 5 OS=Sus scrofa OX=9823 GN=ARPC5L PE=1 SV=1	tr|A0A5K1VDW0|A0A5K1VDW0_PIG	ARPC5L	Q9BPX5	33 kDa	0.15	0.4
5-aminoimidazole-4-carboxamide ribonucleotide formyltransferase/IMP cyclohydrolase OS=Sus scrofa OX=9823 GN=ATIC PE=1 SV=1	tr|B3VMR0|B3VMR0_PIG	ATIC	P31939	64 kDa	0.15	0.3
Claudin OS=Sus scrofa OX=9823 GN=CLDN18 PE=2 SV=1	tr|C3VMW4|C3VMW4_PIG (+1)	CLDN18	P56856	28 kDa	0.15	0
PBX homeobox interacting protein 1 OS=Sus scrofa OX=9823 GN=PBXIP1 PE=1 SV=3	tr|F1RGP4|F1RGP4_PIG	PBXIP1	Q96AQ6	80 kDa	0.15	0.3
Kinesin light chain OS=Sus scrofa OX=9823 GN=KLC4 PE=1 SV=2	tr|F1RRN1|F1RRN1_PIG	KLC4	Q9NSK0	68 kDa	0.15	0
Dipeptidyl peptidase 3 OS=Sus scrofa OX=9823 GN=DPP3 PE=1 SV=1	tr|F1RU52|F1RU52_PIG	DPP3	Q9NY33	83 kDa	0.15	0.5
Histone H3 OS=Sus scrofa OX=9823 GN=HIST1H3E PE=2 SV=2	tr|F1RVA0|F1RVA0_PIG	HIST1H3E	P68431	15 kDa	0.15	0.7
SPARC like 1 OS=Sus scrofa OX=9823 GN=SPARCL1 PE=4 SV=2	tr|F1RW32|F1RW32_PIG	SPARCL1	Q14515	77 kDa	0.15	0
Zinc finger CCCH-type containing 15 OS=Sus scrofa OX=9823 GN=ZC3H15 PE=1 SV=1	tr|F1RYJ5|F1RYJ5_PIG	ZC3H15	Q8WU90	49 kDa	0.15	0
Glutamate--cysteine ligase catalytic subunit isoform X3 OS=Sus scrofa OX=9823 GN=GCLC PE=1 SV=2	tr|F1RZV7|F1RZV7_PIG	GCLC	P48506	67 kDa	0.15	0.3
CDGSH iron sulfur domain 2 OS=Sus scrofa OX=9823 GN=CISD2 PE=1 SV=2	tr|F1S108|F1S108_PIG	CISD2	Q8N5K1	15 kDa	0.15	0
Family with sequence similarity 98 member A OS=Sus scrofa OX=9823 GN=FAM98A PE=1 SV=1	tr|F1S408|F1S408_PIG	FAM98A	Q8NCA5	55 kDa	0.15	0
Nucleolar and coiled-body phosphoprotein 1 OS=Sus scrofa OX=9823 GN=NOLC1 PE=4 SV=3	tr|F1S8T1|F1S8T1_PIG	NOLC1	Q14978	73 kDa	0.15	0.2
NLR family member X1 OS=Sus scrofa OX=9823 GN=NLRX1 PE=1 SV=1	tr|F1SAH1|F1SAH1_PIG	NLRX1	Q86UT6	108 kDa	0.15	0
Aldehyde dehydrogenase OS=Sus scrofa OX=9823 GN=ALDH3A2 PE=1 SV=4	tr|F1SDC7|F1SDC7_PIG	ALDH3A2	P51648	59 kDa	0.15	0.6
60S ribosomal protein L4 OS=Sus scrofa OX=9823 GN=RPL4 PE=1 SV=3	tr|F1SJJ5|F1SJJ5_PIG	RPL4	P36578	48 kDa	0.15	0.7
Lectin, mannose binding 1 OS=Sus scrofa OX=9823 GN=LMAN1 PE=1 SV=2	tr|F1SMS8|F1SMS8_PIG	LMAN1	P49257	58 kDa	0.15	0.4
UV excision repair protein RAD23 OS=Sus scrofa OX=9823 GN=RAD23B PE=3 SV=2	tr|F1SP32|F1SP32_PIG	RAD23B	P54727	35 kDa	0.15	0.8
Actin-related protein 3B isoform 1 OS=Sus scrofa OX=9823 GN=ACTR3B PE=1 SV=4	tr|F1SSP6|F1SSP6_PIG	ACTR3B	Q9P1U1	49 kDa	0.15	0
Tubulin beta chain OS=Sus scrofa OX=9823 GN=TUBB4A PE=1 SV=2	tr|F2Z5K5|F2Z5K5_PIG	TUBB4A	P04350	50 kDa	0.15	1.8
Vacuolar-sorting protein SNF8 OS=Sus scrofa OX=9823 GN=SNF8 PE=1 SV=1	tr|I3L6X7|I3L6X7_PIG	SNF8	Q96H20	29 kDa	0.15	INF
Bromodomain adjacent to zinc finger domain 1B OS=Sus scrofa OX=9823 GN=BAZ1B PE=1 SV=1	tr|I3LCE6|I3LCE6_PIG	BAZ1B	Q9UIG0	171 kDa	0.15	0
Protein phosphatase 1 regulatory subunit 8 OS=Sus scrofa OX=9823 GN=PPP1R8 PE=1 SV=2	tr|I3LFB1|I3LFB1_PIG	PPP1R8	Q12972	38 kDa	0.15	0
Fragile X mental retardation 1 OS=Sus scrofa OX=9823 GN=FMR1 PE=1 SV=2	tr|K7GQ00|K7GQ00_PIG (+1)	FMR1	Q06787	69 kDa	0.15	INF
Protein canopy homolog 3 OS=Sus scrofa OX=9823 GN=CNPY3 PE=3 SV=1	sp|A5GFQ5|CNPY3_PIG (+1)	CNPY3	Q9BT09	32 kDa	0.16	0
Dipeptidyl peptidase 4 OS=Sus scrofa OX=9823 GN=DPP4 PE=1 SV=3	sp|P22411|DPP4_PIG (+1)	DPP4	P27487	88 kDa	0.16	1.4
Endoglin OS=Sus scrofa OX=9823 GN=ENG PE=1 SV=1	sp|P37176|EGLN_PIG (+1)	ENG	P17813	70 kDa	0.16	0
Antibacterial peptide PMAP-23 OS=Sus scrofa OX=9823 GN=PMAP23 PE=2 SV=1	sp|P49930|PMP23_PIG		Not present in human	17 kDa	0.16	0.2
Beta-2-microglobulin OS=Sus scrofa OX=9823 GN=B2M PE=1 SV=1	sp|Q07717|B2MG_PIG (+2)	B2M	P61769	13 kDa	0.16	0.7
Coactivator associated arginine methyltransferase 1 OS=Sus scrofa OX=9823 GN=CARM1 PE=1 SV=1	tr|A0A286ZLV5|A0A286ZLV5_PIG (+3)	CARM1	Q86X55	63 kDa	0.16	0.4
Uncharacterized protein OS=Sus scrofa OX=9823 GN=MACROD1 PE=4 SV=2	tr|A0A286ZRX4|A0A286ZRX4_PIG			40 kDa	0.16	0
Eukaryotic translation initiation factor 5A OS=Sus scrofa OX=9823 GN=EIF5A PE=1 SV=1	tr|A0A286ZUV8|A0A286ZUV8_PIG	EIF5A	P63241	17 kDa	0.16	0.8
Amidohydro-rel domain-containing protein OS=Sus scrofa OX=9823 GN=AMDHD2 PE=4 SV=2	tr|A0A286ZZ76|A0A286ZZ76_PIG	AMDHD2	Q9Y303	60 kDa	0.16	0.4
Purine rich element binding protein B OS=Sus scrofa OX=9823 GN=PURB PE=1 SV=1	tr|A0A287A4H2|A0A287A4H2_PIG	PURB	Q96QR8	33 kDa	0.16	0.5
Isocitrate dehydrogenase [NADP] OS=Sus scrofa OX=9823 GN=IDH1 PE=1 SV=1	tr|A0A287A8M1|A0A287A8M1_PIG (+1)	IDH1	O75874	51 kDa	0.16	0.5
Uncharacterized protein OS=Sus scrofa OX=9823 PE=4 SV=2	tr|A0A287ALC1|A0A287ALC1_PIG			53 kDa	0.16	1.6
MICOS complex subunit MIC60 OS=Sus scrofa OX=9823 GN=IMMT PE=1 SV=1	tr|A0A287AMM6|A0A287AMM6_PIG (+1)	IMMT	Q16891	83 kDa	0.16	0.6
Tensin 3 OS=Sus scrofa OX=9823 GN=TNS3 PE=1 SV=1	tr|A0A287ANH5|A0A287ANH5_PIG (+1)	TNS3	Q68CZ2	166 kDa	0.16	0.4
C-type lectin domain-containing protein OS=Sus scrofa OX=9823 GN=LOC100625180 PE=1 SV=2	tr|A0A287ANQ8|A0A287ANQ8_PIG		Not present in human	28 kDa	0.16	0
Ferrochelatase OS=Sus scrofa OX=9823 GN=FECH PE=1 SV=1	tr|A0A287B3T2|A0A287B3T2_PIG	FECH	P22830	52 kDa	0.16	0.6
Tubulin beta chain OS=Sus scrofa OX=9823 GN=TUBB6 PE=1 SV=1	tr|A0A287B749|A0A287B749_PIG	TUBB6	Q9BUF5	45 kDa	0.16	0.5
Acetyl-coenzyme A synthetase, cytoplasmic isoform X1 OS=Sus scrofa OX=9823 GN=ACSS2 PE=1 SV=1	tr|A0A287BEZ5|A0A287BEZ5_PIG (+1)	ACSS2	Q9NR19	80 kDa	0.16	0.2
Dolichyl-diphosphooligosaccharide--protein glycosyltransferase subunit 1 OS=Sus scrofa OX=9823 GN=RPN1 PE=3 SV=1	tr|A0A287BFC9|A0A287BFC9_PIG	RPN1	P04843	67 kDa	0.16	0.7
NADH dehydrogenase ubiquinone flavoprotein 2, mitochondrial OS=Sus scrofa OX=9823 GN=NDUFV2 PE=1 SV=1	tr|A0A287BG40|A0A287BG40_PIG	NDUFV2	P19404	27 kDa	0.16	0.5
Proteasome subunit beta OS=Sus scrofa OX=9823 GN=PSMB1 PE=1 SV=1	tr|A0A287BPP9|A0A287BPP9_PIG	PSMB1	P20618	26 kDa	0.16	1.5
Plasma serine protease inhibitor preproprotein OS=Sus scrofa OX=9823 GN=SERPINA5 PE=1 SV=1	tr|A0A480P2B4|A0A480P2B4_PIG (+1)	SERPINA5	P05154	46 kDa	0.16	0
Nuclear autoantigenic sperm protein OS=Sus scrofa OX=9823 GN=NASP PE=1 SV=1	tr|A0A5G2QJ28|A0A5G2QJ28_PIG (+1)	NASP	P49321	87 kDa	0.16	0.3
Malic enzyme OS=Sus scrofa OX=9823 GN=ME3 PE=1 SV=1	tr|A0A5G2RAT9|A0A5G2RAT9_PIG (+1)	ME3	Q16798	67 kDa	0.16	0.3
Keratin 18 OS=Sus scrofa OX=9823 GN=KRT18 PE=1 SV=1	tr|A0A5G2RBD3|A0A5G2RBD3_PIG	KRT18	P05783	47 kDa	0.16	0.6
Histone H2A OS=Sus scrofa OX=9823 GN=H2A.Z PE=2 SV=1	tr|B1PEY3|B1PEY3_PIG	H2AZ1	P0C0S5	14 kDa	0.16	0.7
Ectonucleotide pyrophosphatase/phosphodiesterase family member 6 OS=Sus scrofa OX=9823 GN=ENPP6 PE=4 SV=3	tr|F1RSZ8|F1RSZ8_PIG	ENPP6	Q6UWR7	51 kDa	0.16	1.4
AB hydrolase-1 domain-containing protein OS=Sus scrofa OX=9823 GN=BPHL PE=1 SV=4	tr|F1RWY7|F1RWY7_PIG	BPHL	Q86WA6	34 kDa	0.16	0.4
Voltage-dependent anion-selective channel protein 2 OS=Sus scrofa OX=9823 GN=VDAC2 PE=4 SV=3	tr|F1S2F6|F1S2F6_PIG	VDAC2	P45880	32 kDa	0.16	0.8
Uncharacterized protein OS=Sus scrofa OX=9823 GN=HEBP2 PE=1 SV=2	tr|F1S6A9|F1S6A9_PIG			40 kDa	0.16	0.5
Uncharacterized protein OS=Sus scrofa OX=9823 GN=HOGA1 PE=1 SV=3	tr|F1S8X9|F1S8X9_PIG			35 kDa	0.16	0.08
Mitochondrial carnitine/acylcarnitine carrier protein OS=Sus scrofa OX=9823 GN=SLC25A20 PE=3 SV=1	tr|F1SKK1|F1SKK1_PIG	SLC25A20	O43772	33 kDa	0.16	0.2
GTPase, IMAP family member 8 OS=Sus scrofa OX=9823 GN=GIMAP8 PE=4 SV=4	tr|F1SSJ1|F1SSJ1_PIG	GIMAP8	Q8ND71	85 kDa	0.16	INF
Chromosome 11 open reading frame 54 OS=Sus scrofa OX=9823 GN=C9H11orf54 PE=1 SV=2	tr|F1STK8|F1STK8_PIG		Not present in human	35 kDa	0.16	0
Protein archease isoform 1 OS=Sus scrofa OX=9823 GN=ZBTB8OS PE=1 SV=2	tr|I3L7E1|I3L7E1_PIG	ZBTB8OS	Q8IWT0	20 kDa	0.16	INF
NPL4 homolog, ubiquitin recognition factor OS=Sus scrofa OX=9823 GN=NPLOC4 PE=1 SV=3	tr|I3L829|I3L829_PIG	NPLOC4	Q8TAT6	84 kDa	0.16	0.6
Leucine rich repeat containing 59 OS=Sus scrofa OX=9823 GN=LRRC59 PE=1 SV=2	tr|I3L9M7|I3L9M7_PIG	LRRC59	Q96AG4	32 kDa	0.16	0.5
CCR4-NOT transcription complex subunit 1 OS=Sus scrofa OX=9823 GN=CNOT1 PE=1 SV=2	tr|I3LIC6|I3LIC6_PIG	CNOT1	A5YKK6	264 kDa	0.16	3.3
FAS-associated death domain protein OS=Sus scrofa OX=9823 GN=FADD PE=1 SV=1	tr|Q56VC2|Q56VC2_PIG	FADD	Q13158	24 kDa	0.16	0.7
Ribonuclease K3 OS=Sus scrofa OX=9823 GN=RNASE6 PE=1 SV=2	sp|P81649|RNAS6_PIG (+1)	RNASE6	Q93091	17 kDa	0.17	0
Cathepsin L1 OS=Sus scrofa OX=9823 GN=CTSL PE=2 SV=1	sp|Q28944|CATL1_PIG	CTSL	P07711	37 kDa	0.17	0.3
60S ribosomal protein L35 OS=Sus scrofa OX=9823 GN=RPL35 PE=1 SV=3	sp|Q29361|RL35_PIG	RPL35	P42766	15 kDa	0.17	0.4
Zinc finger CCCH-type containing, antiviral 1 OS=Sus scrofa OX=9823 GN=ZC3HAV1 PE=1 SV=1	tr|A0A286ZQ82|A0A286ZQ82_PIG (+1)	ZC3HAV1	Q7Z2W4	99 kDa	0.17	0.4
Uncharacterized protein OS=Sus scrofa OX=9823 GN=COL3A1 PE=1 SV=2	tr|A0A286ZQ85|A0A286ZQ85_PIG			139 kDa	0.17	0
PDS5 cohesin associated factor A OS=Sus scrofa OX=9823 GN=PDS5A PE=1 SV=1	tr|A0A286ZQZ0|A0A286ZQZ0_PIG (+1)	PDS5A	Q29RF7	147 kDa	0.17	0.3
Uncharacterized protein OS=Sus scrofa OX=9823 GN=LOC100622780 PE=1 SV=2	tr|A0A286ZSN6|A0A286ZSN6_PIG			75 kDa	0.17	0
DnaJ heat shock protein family (Hsp40) member B6 OS=Sus scrofa OX=9823 GN=DNAJB6 PE=4 SV=2	tr|A0A286ZWP6|A0A286ZWP6_PIG (+1)	DNAJB6	O75190	35 kDa	0.17	0
Cytochrome b5 reductase 1 OS=Sus scrofa OX=9823 GN=CYB5R1 PE=1 SV=1	tr|A0A286ZXF1|A0A286ZXF1_PIG	CYB5R1	Q9UHQ9	54 kDa	0.17	0.6
Ras-related protein Rab-21 OS=Sus scrofa OX=9823 GN=TMEM19 PE=1 SV=1	tr|A0A287A4W6|A0A287A4W6_PIG	TMEM19	Q96HH6	24 kDa	0.17	0.6
Pleckstrin homology domain-containing family O member 2 isoform 1 OS=Sus scrofa OX=9823 GN=PLEKHO2 PE=1 SV=1	tr|A0A287AFQ5|A0A287AFQ5_PIG (+1)	PLEKHO2	Q8TD55	54 kDa	0.17	0.5
Superoxide dismutase [Mn], mitochondrial OS=Sus scrofa OX=9823 GN=SOD2 PE=1 SV=2	tr|A0A287APZ8|A0A287APZ8_PIG	SOD2	P04179	53 kDa	0.17	2.4
Uncharacterized protein OS=Sus scrofa OX=9823 GN=LOC100739163 PE=1 SV=2	tr|A0A287AQ27|A0A287AQ27_PIG			30 kDa	0.17	INF
D-2-hydroxyglutarate dehydrogenase OS=Sus scrofa OX=9823 GN=D2HGDH PE=1 SV=1	tr|A0A287B6H6|A0A287B6H6_PIG (+3)	D2HGDH	Q8N465	54 kDa	0.17	0
Antileukoproteinase OS=Sus scrofa OX=9823 GN=LOC100512873 PE=1 SV=1	tr|A0A287B8T7|A0A287B8T7_PIG (+1)	SLPI	P03973	17 kDa	0.17	0
Uncharacterized protein OS=Sus scrofa OX=9823 GN=LOC100622246 PE=1 SV=1	tr|A0A287BL83|A0A287BL83_PIG			31 kDa	0.17	0.4
Mannose-6-phosphate isomerase OS=Sus scrofa OX=9823 GN=MPI PE=1 SV=2	tr|A0A287BNZ5|A0A287BNZ5_PIG	MPI	P34949	59 kDa	0.17	0.4
RNA binding motif protein 25 OS=Sus scrofa OX=9823 GN=RBM25 PE=1 SV=2	tr|A0A287BQP1|A0A287BQP1_PIG	RBM25	P49756	102 kDa	0.17	0.4
ADP-sugar pyrophosphatase isoform 1 OS=Sus scrofa OX=9823 GN=NUDT5 PE=1 SV=1	tr|A0A480XE17|A0A480XE17_PIG	NUDT5	Q9UKK9	24 kDa	0.17	0.6
Proteasome 26S subunit, ATPase 3 OS=Sus scrofa OX=9823 GN=PSMC3 PE=1 SV=1	tr|A0A5G2Q9I2|A0A5G2Q9I2_PIG	PSMC3	P17980	57 kDa	0.17	0.6
Protein phosphatase 6 regulatory subunit 1 OS=Sus scrofa OX=9823 GN=PPP6R1 PE=1 SV=1	tr|A0A5G2R7F5|A0A5G2R7F5_PIG (+1)	PPP6R1	Q9UPN7	95 kDa	0.17	0
Ubiquitin like modifier activating enzyme 1 OS=Sus scrofa OX=9823 GN=UBA1 PE=1 SV=1	tr|A0A5K1U589|A0A5K1U589_PIG	UBA1	P22314	114 kDa	0.17	0.7
Flap endonuclease 1 OS=Sus scrofa OX=9823 GN=FEN1 PE=1 SV=1	tr|F1RKS3|F1RKS3_PIG	FEN1	P39748	42 kDa	0.17	0.3
Protein VAC14 homolog OS=Sus scrofa OX=9823 GN=VAC14 PE=1 SV=3	tr|F1S3E8|F1S3E8_PIG	VAC14	Q08AM6	88 kDa	0.17	0.3
ABRA C-terminal like OS=Sus scrofa OX=9823 GN=ABRACL PE=4 SV=3	tr|F1S6Z3|F1S6Z3_PIG	ABRACL	Q9P1F3	9 kDa	0.17	0.4
Complement C3 OS=Sus scrofa OX=9823 GN=C3 PE=1 SV=3	tr|F1SBS4|F1SBS4_PIG	C3	P01024	187 kDa	0.17	1.7
Alpha-2-HS-glycoprotein OS=Sus scrofa OX=9823 GN=AHSG PE=1 SV=3	tr|F1SFI7|F1SFI7_PIG	AHSG	P02765	39 kDa	0.17	0.8
Basic leucine zipper and W2 domains 1 OS=Sus scrofa OX=9823 GN=BZW1 PE=4 SV=3	tr|F1SI55|F1SI55_PIG	BZW1	Q7L1Q6	51 kDa	0.17	3.3
Heparan sulfate proteoglycan 2 OS=Sus scrofa OX=9823 GN=HSPG2 PE=1 SV=4	tr|F1SU03|F1SU03_PIG	HSPG2	P98160	462 kDa	0.17	0.6
Four and a half LIM domains 3 OS=Sus scrofa OX=9823 GN=FHL3 PE=1 SV=2	tr|F1SV27|F1SV27_PIG (+1)	FHL3	Q13643	32 kDa	0.17	0
Uncharacterized protein OS=Sus scrofa OX=9823 GN=GOLGA2 PE=1 SV=2	tr|I3LIX0|I3LIX0_PIG (+1)			116 kDa	0.17	0.4
Neuropilin OS=Sus scrofa OX=9823 GN=NRP1 PE=1 SV=3	tr|K7GN82|K7GN82_PIG (+1)	NRP1	O14786	102 kDa	0.17	0
X-prolyl aminopeptidase (Aminopeptidase P) 1, soluble OS=Sus scrofa OX=9823 GN=XPNPEP1 PE=1 SV=1	tr|K9IVF7|K9IVF7_PIG	XPNPEP1	Q9NQW7	75 kDa	0.17	0.7
Ubiquitin-fold modifier 1 OS=Sus scrofa OX=9823 GN=UFM1 PE=1 SV=1	tr|M3UZ42|M3UZ42_PIG	UFM1	P61960	9 kDa	0.17	0.6
Triokinase/FMN cyclase OS=Sus scrofa OX=9823 GN=TKFC PE=1 SV=2	sp|F1RKQ4|TKFC_PIG	TKFC	Q3LXA3	59 kDa	0.18	0.3
Hemoglobin subunit beta OS=Sus scrofa OX=9823 GN=HBB PE=1 SV=3	sp|P02067|HBB_PIG	HBB	P68871	16 kDa	0.18	2.9
Complement factor D OS=Sus scrofa OX=9823 GN=CFD PE=2 SV=1	sp|P51779|CFAD_PIG	CFD	P00746	28 kDa	0.18	0.5
ATP synthase subunit O, mitochondrial OS=Sus scrofa OX=9823 GN=ATP5PO PE=1 SV=1	sp|Q2EN81|ATPO_PIG (+1)	ATP5PO	P48047	23 kDa	0.18	0.7
Aldehyde dehydrogenase, mitochondrial OS=Sus scrofa OX=9823 GN=ALDH2 PE=2 SV=1	sp|Q2XQV4|ALDH2_PIG	ALDH2	P05091	57 kDa	0.18	0.5
Electron transfer flavoprotein subunit beta OS=Sus scrofa OX=9823 GN=ETFB PE=1 SV=3	sp|Q6UAQ8|ETFB_PIG	ETFB	P38117	28 kDa	0.18	0.4
Protein transport protein sec16 OS=Sus scrofa OX=9823 GN=SEC16A PE=1 SV=1	tr|A0A286ZJC7|A0A286ZJC7_PIG (+5)	SEC16A	O15027	240 kDa	0.18	0.4
Protein kinase cAMP-dependent type II regulatory subunit beta OS=Sus scrofa OX=9823 GN=PRKAR2B PE=1 SV=2	tr|A0A286ZNQ7|A0A286ZNQ7_PIG	PRKAR2B	P31323	52 kDa	0.18	0.6
Alpha-1B-glycoprotein OS=Sus scrofa OX=9823 GN=A1BG PE=1 SV=1	tr|A0A286ZUY9|A0A286ZUY9_PIG (+1)	A1BG	P04217	75 kDa	0.18	1.7
40S ribosomal protein S19 OS=Sus scrofa OX=9823 GN=RPS19 PE=4 SV=1	tr|A0A286ZX70|A0A286ZX70_PIG	RPS19	P39019	22 kDa	0.18	0.7
Galectin 3 binding protein OS=Sus scrofa OX=9823 GN=LGALS3BP PE=4 SV=2	tr|A0A287A604|A0A287A604_PIG (+1)	LGALS3BP	Q08380	56 kDa	0.18	1.6
Heterogeneous nuclear ribonucleoprotein H2 OS=Sus scrofa OX=9823 GN=HNRNPH2 PE=1 SV=2	tr|A0A287A9H4|A0A287A9H4_PIG	HNRNPH2	P55795	49 kDa	0.18	0.5
Protein phosphatase 6 regulatory subunit 3 OS=Sus scrofa OX=9823 GN=PPP6R3 PE=1 SV=1	tr|A0A287AJG5|A0A287AJG5_PIG (+2)	PPP6R3	Q5H9R7	98 kDa	0.18	0.5
Ferritin OS=Sus scrofa OX=9823 GN=FTH1 PE=1 SV=2	tr|A0A287AL10|A0A287AL10_PIG	FTH1	P02794	21 kDa	0.18	0.6
Protocadherin 1 OS=Sus scrofa OX=9823 GN=PCDH1 PE=4 SV=2	tr|A0A287AU89|A0A287AU89_PIG (+1)	PCDH1	Q08174	148 kDa	0.18	0.5
N-acylsphingosine amidohydrolase 1 OS=Sus scrofa OX=9823 GN=ASAH1 PE=1 SV=2	tr|A0A287B5G7|A0A287B5G7_PIG (+1)	ASAH1	Q13510	53 kDa	0.18	1.6
Nucleoporin 153 OS=Sus scrofa OX=9823 GN=NUP153 PE=1 SV=1	tr|A0A287BF68|A0A287BF68_PIG	NUP153	P49790	153 kDa	0.18	0.2
Cytochrome c oxidase subunit OS=Sus scrofa OX=9823 GN=COX6A1 PE=1 SV=2	tr|A0A287BGN0|A0A287BGN0_PIG	COX6A1	P12074	12 kDa	0.18	0.3
Galectin OS=Sus scrofa OX=9823 GN=LGALS3 PE=1 SV=1	tr|A0A5G2QE07|A0A5G2QE07_PIG (+4)	LGALS3	P17931	27 kDa	0.18	1.4
Histone H2B OS=Sus scrofa OX=9823 GN=HIST1H1D PE=1 SV=1	tr|A0A5G2QML3|A0A5G2QML3_PIG	HIST1H1D	P06899	33 kDa	0.18	1.2
Dystrophin OS=Sus scrofa OX=9823 GN=DMD PE=4 SV=1	tr|A0A5G2QTV4|A0A5G2QTV4_PIG	DMD	P11532	426 kDa	0.18	0.3
Bone marrow stromal cell antigen 1 OS=Sus scrofa OX=9823 GN=BST1 PE=1 SV=1	tr|A0A5G2QZ47|A0A5G2QZ47_PIG	BST1	Q10588	33 kDa	0.18	1.3
Hemoglobin subunit beta OS=Sus scrofa OX=9823 GN=HBB PE=1 SV=1	tr|F1RII7|F1RII7_PIG	HBB	P68871	16 kDa	0.18	1.5
Peptidylprolyl isomerase D OS=Sus scrofa OX=9823 GN=PPID PE=4 SV=1	tr|F1RTY6|F1RTY6_PIG	PPID	Q08752	41 kDa	0.18	0.6
Glucosidase alpha, acid OS=Sus scrofa OX=9823 GN=GAA PE=1 SV=3	tr|F1RZ82|F1RZ82_PIG (+1)	GAA	P10253	104 kDa	0.18	0.5
Trimethyllysine dioxygenase, mitochondrial isoform 1 OS=Sus scrofa OX=9823 GN=TMLHE PE=1 SV=3	tr|F1RZS1|F1RZS1_PIG	TMLHE	Q9NVH6	50 kDa	0.18	0.4
Zinc finger protein 185 with LIM domain OS=Sus scrofa OX=9823 GN=ZNF185 PE=1 SV=3	tr|F1S2C9|F1S2C9_PIG	ZNF185	O15231	73 kDa	0.18	0.4
Ceruloplasmin OS=Sus scrofa OX=9823 GN=CP PE=1 SV=4	tr|F1SKB1|F1SKB1_PIG	CP	P00450	124 kDa	0.18	1.4
Tetratricopeptide repeat domain 38 OS=Sus scrofa OX=9823 GN=TTC38 PE=4 SV=2	tr|F1SM81|F1SM81_PIG	TTC38	Q5R3I4	53 kDa	0.18	0.5
3-hydroxybutyrate dehydrogenase 1 OS=Sus scrofa OX=9823 GN=BDH1 PE=1 SV=3	tr|F1SQX8|F1SQX8_PIG	BDH1	Q02338	39 kDa	0.18	0.3
Annexin OS=Sus scrofa OX=9823 GN=ANXA5 PE=1 SV=4	tr|F2Z5C1|F2Z5C1_PIG	ANXA5	P08758	36 kDa	0.18	1.5
Acetyl-CoA acetyltransferase 1 OS=Sus scrofa OX=9823 GN=ACAT1 PE=1 SV=2	tr|I3LP02|I3LP02_PIG	ACAT1	P24752	45 kDa	0.18	0.5
Interleukin enhancer binding factor 3 OS=Sus scrofa OX=9823 GN=ILF3 PE=1 SV=3	tr|K7GL83|K7GL83_PIG	ILF3	Q12906	96 kDa	0.18	0.6
Receptor of activated protein C kinase 1 OS=Sus scrofa OX=9823 GN=RACK1 PE=1 SV=3	sp|P63246|RACK1_PIG	RACK1	P63244	35 kDa	0.19	0.7
Clusterin OS=Sus scrofa OX=9823 GN=CLU PE=1 SV=1	sp|Q29549|CLUS_PIG (+1)	CLU	P10909	52 kDa	0.19	1.5
E3 ubiquitin-protein ligase CBL OS=Sus scrofa OX=9823 GN=CBL PE=1 SV=1	tr|A0A286ZQE1|A0A286ZQE1_PIG (+2)	CBL	P22681	101 kDa	0.19	0
Sialoadhesin OS=Sus scrofa OX=9823 GN=SIGLEC1 PE=1 SV=2	tr|A0A286ZYH0|A0A286ZYH0_PIG	SIGLEC1	Q9BZZ2	185 kDa	0.19	0.6
Drebrin 1 OS=Sus scrofa OX=9823 GN=DBN1 PE=4 SV=2	tr|A0A287A0I8|A0A287A0I8_PIG	DBN1	Q16643	77 kDa	0.19	0.4
Afamin OS=Sus scrofa OX=9823 GN=AFM PE=1 SV=1	tr|A0A287A363|A0A287A363_PIG (+3)	AFM	P43652	70 kDa	0.19	0.3
IST1 factor associated with ESCRT-III OS=Sus scrofa OX=9823 GN=IST1 PE=1 SV=1	tr|A0A287A426|A0A287A426_PIG (+1)	IST1	P53990	41 kDa	0.19	3.9
Enoyl-CoA hydratase, mitochondrial OS=Sus scrofa OX=9823 GN=ECHS1 PE=1 SV=2	tr|A0A287AA21|A0A287AA21_PIG	ECHS1	P30084	35 kDa	0.19	0.4
Heat shock protein family A (Hsp70) member 9 OS=Sus scrofa OX=9823 GN=HSPA9 PE=1 SV=1	tr|A0A287ADJ2|A0A287ADJ2_PIG	HSPA9	P38646	74 kDa	0.19	0.6
AUP1 lipid droplet regulating VLDL assembly factor OS=Sus scrofa OX=9823 GN=AUP1 PE=1 SV=1	tr|A0A287AEA4|A0A287AEA4_PIG (+2)	AUP1	Q9Y679	41 kDa	0.19	0
TRIO and F-actin binding protein OS=Sus scrofa OX=9823 GN=TRIOBP PE=4 SV=2	tr|A0A287AK89|A0A287AK89_PIG	TRIOBP	Q9H2D6	224 kDa	0.19	3.5
Annexin OS=Sus scrofa OX=9823 GN=ANXA4 PE=3 SV=2	tr|A0A287B583|A0A287B583_PIG	ANXA4	P09525	36 kDa	0.19	1.2
Lymphocyte specific protein 1 OS=Sus scrofa OX=9823 GN=LSP1 PE=4 SV=1	tr|A0A287BI62|A0A287BI62_PIG	LSP1	P33241	38 kDa	0.19	0.6
NEDD8-activating enzyme E1 catalytic subunit isoform 1 OS=Sus scrofa OX=9823 GN=UBA3 PE=1 SV=1	tr|A0A5G2QVD2|A0A5G2QVD2_PIG	UBA3	Q8TBC4	52 kDa	0.19	0.3
Protein-S-isoprenylcysteine O-methyltransferase OS=Sus scrofa OX=9823 GN=ICMT PE=1 SV=1	tr|A0A5G2QW71|A0A5G2QW71_PIG	ICMT	O60725	39 kDa	0.19	0.6
ATP binding cassette subfamily C member 3 OS=Sus scrofa OX=9823 GN=ABCC3 PE=1 SV=1	tr|A0A5G2R2F8|A0A5G2R2F8_PIG (+2)	ABCC3	O15438	170 kDa	0.19	4.4
Tropomyosin alpha-3 chain OS=Sus scrofa OX=9823 GN=TPM3 PE=1 SV=1	tr|A0A5G2RJ89|A0A5G2RJ89_PIG	TPM3	P06753	33 kDa	0.19	1.6
Calbindin 1 OS=Sus scrofa OX=9823 GN=CALB1 PE=1 SV=1	tr|B3VFB6|B3VFB6_PIG	CALB1	P05937	30 kDa	0.19	4.5
Huntingtin interacting protein 1 OS=Sus scrofa OX=9823 GN=HIP1 PE=1 SV=3	tr|F1RKC0|F1RKC0_PIG	HIP1	O00291	111 kDa	0.19	0.5
Cytochrome P450 family 7 subfamily B member 1 OS=Sus scrofa OX=9823 GN=CYP7B1 PE=3 SV=4	tr|F1RTA9|F1RTA9_PIG	CYP7B1	O75881	59 kDa	0.19	0.6
Uncharacterized protein OS=Sus scrofa OX=9823 GN=HSPE1 PE=3 SV=1	tr|F1SMZ6|F1SMZ6_PIG			11 kDa	0.19	0.6
Myosin light chain 12A OS=Sus scrofa OX=9823 GN=MYL12A PE=1 SV=2	tr|F2Z5V6|F2Z5V6_PIG	MYL12A	P19105	21 kDa	0.19	0.7
Uncharacterized protein OS=Sus scrofa OX=9823 GN=IGBP1 PE=4 SV=1	tr|K7GQ35|K7GQ35_PIG			39 kDa	0.19	0.5
Glutaredoxin-1 OS=Sus scrofa OX=9823 GN=GLRX PE=1 SV=2	sp|P12309|GLRX1_PIG	GLRX	P35754	12 kDa	0.2	0.6
Small ubiquitin-related modifier 2 OS=Sus scrofa OX=9823 GN=SUMO2 PE=3 SV=1	sp|P61958|SUMO2_PIG	SUMO2	P61956	11 kDa	0.2	0.3
m7GpppX diphosphatase OS=Sus scrofa OX=9823 GN=DCPS PE=2 SV=1	sp|Q8MIZ3|DCPS_PIG	DCPS	Q96C86	39 kDa	0.2	0.6
Membrane-associated progesterone receptor component 1 OS=Sus scrofa OX=9823 GN=PGRMC1 PE=1 SV=3	sp|Q95250|PGRC1_PIG	PGRMC1	O00264	22 kDa	0.2	0.5
Uncharacterized protein OS=Sus scrofa OX=9823 GN=SQOR PE=1 SV=2	tr|A0A286ZL94|A0A286ZL94_PIG (+1)			48 kDa	0.2	0.7
DnaJ heat shock protein family (Hsp40) member C13 OS=Sus scrofa OX=9823 GN=DNAJC13 PE=1 SV=1	tr|A0A286ZNK9|A0A286ZNK9_PIG (+2)	DNAJC13	O75165	253 kDa	0.2	0.3
Ig-like domain-containing protein OS=Sus scrofa OX=9823 PE=4 SV=2	tr|A0A286ZSX6|A0A286ZSX6_PIG		Not present in human	12 kDa	0.2	0
Coronin OS=Sus scrofa OX=9823 GN=CORO1A PE=3 SV=2	tr|A0A286ZUJ1|A0A286ZUJ1_PIG	CORO1A	P31146	54 kDa	0.2	0.7
Uncharacterized protein OS=Sus scrofa OX=9823 GN=CELF2 PE=4 SV=2	tr|A0A286ZW19|A0A286ZW19_PIG			56 kDa	0.2	0.5
Collagen type IV alpha 4 chain OS=Sus scrofa OX=9823 GN=COL4A4 PE=4 SV=1	tr|A0A286ZWF0|A0A286ZWF0_PIG	COL4A4	P53420	132 kDa	0.2	0.3
Adipocyte plasma membrane associated protein OS=Sus scrofa OX=9823 GN=APMAP PE=1 SV=1	tr|A0A287A6K7|A0A287A6K7_PIG	APMAP	Q9HDC9	69 kDa	0.2	0.7
Anoctamin OS=Sus scrofa OX=9823 GN=ANO6 PE=1 SV=2	tr|A0A287A905|A0A287A905_PIG	ANO6	Q4KMQ2	106 kDa	0.2	0.5
Aspartate beta-hydroxylase OS=Sus scrofa OX=9823 GN=ASPH PE=1 SV=2	tr|A0A287AI01|A0A287AI01_PIG (+1)	ASPH	Q12797	84 kDa	0.2	0.6
Mitogen-activated protein kinase OS=Sus scrofa OX=9823 GN=MAPK3 PE=1 SV=1	tr|A0A287AJK9|A0A287AJK9_PIG	MAPK3	P27361	39 kDa	0.2	0.5
D-aspartate oxidase OS=Sus scrofa OX=9823 GN=DDO PE=4 SV=2	tr|A0A287AJN4|A0A287AJN4_PIG (+1)	DDO	Q99489	40 kDa	0.2	0.2
Synaptopodin 2 OS=Sus scrofa OX=9823 GN=SYNPO2 PE=1 SV=1	tr|A0A287AUH9|A0A287AUH9_PIG	SYNPO2	Q9UMS6	136 kDa	0.2	0.5
Stromal interaction molecule 1 OS=Sus scrofa OX=9823 GN=STIM1 PE=1 SV=1	tr|A0A287AX96|A0A287AX96_PIG	STIM1	Q13586	81 kDa	0.2	0.5
Cytochrome P450 family 4 subfamily V member 2 OS=Sus scrofa OX=9823 GN=CYP4V2 PE=3 SV=2	tr|A0A287B1J6|A0A287B1J6_PIG	CYP4V2	Q6ZWL3	61 kDa	0.2	0.2
Inosine-5'-monophosphate dehydrogenase OS=Sus scrofa OX=9823 GN=QRICH1 PE=1 SV=1	tr|A0A287B6A4|A0A287B6A4_PIG		Not present in human	135 kDa	0.2	0.5
Mitochondrial amidoxime-reducing component 1 OS=Sus scrofa OX=9823 GN=MARC1 PE=1 SV=1	tr|A0A287B6R1|A0A287B6R1_PIG	MARC1	Q5VT66	38 kDa	0.2	0
Ubiquitin conjugating enzyme E2 O OS=Sus scrofa OX=9823 GN=UBE2O PE=1 SV=1	tr|A0A287B778|A0A287B778_PIG	UBE2O	Q9C0C9	141 kDa	0.2	0.3
Apoptosis inhibitor 5 OS=Sus scrofa OX=9823 GN=API5 PE=4 SV=2	tr|A0A287BHM4|A0A287BHM4_PIG	API5	Q9BZZ5	57 kDa	0.2	0.6
Ribosomal protein OS=Sus scrofa OX=9823 GN=RPL10A PE=1 SV=2	tr|A0A287BSA8|A0A287BSA8_PIG	RPL10A	P62906	25 kDa	0.2	0.7
Unconventional myosin-VI OS=Sus scrofa OX=9823 GN=MYO6 PE=1 SV=1	tr|A0A480QP12|A0A480QP12_PIG (+1)	MYO6	Q9UM54	145 kDa	0.2	0.4
Kininogen 1 OS=Sus scrofa OX=9823 GN=KNG1 PE=1 SV=1	tr|A0A5G2QZH2|A0A5G2QZH2_PIG	KNG1	P01042	70 kDa	0.2	8.2
Cathepsin B OS=Sus scrofa OX=9823 GN=CTSB PE=1 SV=1	tr|A0A5S6GR81|A0A5S6GR81_PIG	CTSB	P07858	46 kDa	0.2	0.7
Collagen type XII alpha 1 chain OS=Sus scrofa OX=9823 GN=COL12A1 PE=1 SV=3	tr|F1RQI0|F1RQI0_PIG	COL12A1	Q99715	333 kDa	0.2	0.6
NSFL1 cofactor OS=Sus scrofa OX=9823 GN=NSFL1C PE=1 SV=3	tr|F1S880|F1S880_PIG	NSFL1C	Q9UNZ2	41 kDa	0.2	0.7
Low molecular weight phosphotyrosine protein phosphatase OS=Sus scrofa OX=9823 GN=ACP1 PE=1 SV=4	tr|F1S9H9|F1S9H9_PIG	ACP1	P24666	26 kDa	0.2	0.7
Cell division cycle 73 OS=Sus scrofa OX=9823 GN=CDC73 PE=1 SV=3	tr|F1SAB0|F1SAB0_PIG	CDC73	Q6P1J9	61 kDa	0.2	0.3
Coatomer subunit gamma OS=Sus scrofa OX=9823 GN=COPG1 PE=1 SV=4	tr|F1SPF9|F1SPF9_PIG	COPG1	Q9Y678	94 kDa	0.2	0.7
Bridging integrator 2 OS=Sus scrofa OX=9823 GN=BIN2 PE=4 SV=3	tr|I3L7Y9|I3L7Y9_PIG	BIN2	Q9UBW5	56 kDa	0.2	0.5
DNA-directed RNA polymerase subunit beta OS=Sus scrofa OX=9823 GN=POLR2B PE=1 SV=2	tr|I3LGP4|I3LGP4_PIG	POLR2B	P30876	142 kDa	0.2	3.4
Enoyl-CoA hydratase 1 OS=Sus scrofa OX=9823 GN=ECH1 PE=1 SV=2	tr|I3LJJ4|I3LJJ4_PIG	ECH1	Q13011	32 kDa	0.2	0.3
Prohibitin OS=Sus scrofa OX=9823 GN=PHB2 PE=1 SV=1	tr|I3LQN4|I3LQN4_PIG	PHB2	Q99623	33 kDa	0.2	0.7
Nucleophosmin OS=Sus scrofa OX=9823 GN=NPM1 PE=1 SV=2	tr|I3LUP6|I3LUP6_PIG	NPM1	P06748	33 kDa	0.2	1.5
Non-histone chromosomal protein HMG-17 OS=Sus scrofa OX=9823 GN=HMGN2 PE=1 SV=2	sp|P80272|HMGN2_PIG (+1)	HMGN2	P05204	9 kDa	0.21	0
Cofilin-2 OS=Sus scrofa OX=9823 GN=CFL2 PE=2 SV=4	sp|Q5G6V9|COF2_PIG	CFL2	Q9Y281	19 kDa	0.21	0.6
Apolipoprotein H OS=Sus scrofa OX=9823 GN=APOH PE=1 SV=1	tr|A0A286ZFW3|A0A286ZFW3_PIG	APOH	P02749	38 kDa	0.21	0.7
Acyl-CoA thioesterase 4 OS=Sus scrofa OX=9823 GN=ACOT4 PE=1 SV=2	tr|A0A286ZVQ0|A0A286ZVQ0_PIG	ACOT4	Q8N9L9	46 kDa	0.21	0.6
Uncharacterized protein OS=Sus scrofa OX=9823 GN=MANF PE=1 SV=1	tr|A0A287A2R1|A0A287A2R1_PIG (+1)			21 kDa	0.21	0.3
Uncharacterized protein OS=Sus scrofa OX=9823 PE=1 SV=1	tr|A0A287ADR1|A0A287ADR1_PIG			26 kDa	0.21	0.4
Acetyl-CoA acetyltransferase 2 OS=Sus scrofa OX=9823 GN=ACAT2 PE=1 SV=1	tr|A0A287AHQ0|A0A287AHQ0_PIG	ACAT2	Q9BWD1	41 kDa	0.21	0.5
Cytochrome P450 family 4 subfamily B member 1 OS=Sus scrofa OX=9823 GN=CYP4B1 PE=1 SV=1	tr|A0A287AJX4|A0A287AJX4_PIG	CYP4B1	P13584	53 kDa	0.21	0.2
IQ motif and Sec7 domain 1 OS=Sus scrofa OX=9823 GN=IQSEC1 PE=1 SV=2	tr|A0A287BAM2|A0A287BAM2_PIG (+1)	IQSEC1	Q6DN90	134 kDa	0.21	0.3
RNA binding motif protein 39 OS=Sus scrofa OX=9823 GN=RBM39 PE=1 SV=1	tr|A0A287BAQ0|A0A287BAQ0_PIG	RBM39	Q14498	59 kDa	0.21	0.7
Electron transfer flavoprotein-ubiquinone oxidoreductase OS=Sus scrofa OX=9823 GN=ETFDH PE=1 SV=2	tr|A0A287BPI1|A0A287BPI1_PIG	ETFDH	Q16134	69 kDa	0.21	0.3
Fibrinogen gamma chain OS=Sus scrofa OX=9823 GN=FGG PE=1 SV=1	tr|A0A5G2QUU1|A0A5G2QUU1_PIG (+2)	FGG	P02679	50 kDa	0.21	0.5
Ran GTPase activating protein 1 OS=Sus scrofa OX=9823 GN=RANGAP1 PE=1 SV=1	tr|A0A5G2R6N4|A0A5G2R6N4_PIG	RANGAP1	P46060	63 kDa	0.21	0.5
Tetraspanin OS=Sus scrofa OX=9823 GN=CD81 PE=1 SV=1	tr|A0A5G2RMT1|A0A5G2RMT1_PIG	CD81	P60033	28 kDa	0.21	0.6
Gamma-synuclein OS=Sus scrofa OX=9823 GN=SNCG PE=1 SV=1	tr|A7YX24|A7YX24_PIG	SNCG	O76070	13 kDa	0.21	2
Farnesyl diphosphate synthase OS=Sus scrofa OX=9823 GN=FDPS PE=1 SV=1	tr|D0G6X4|D0G6X4_PIG	FDPS	P14324	49 kDa	0.21	0.3
GLOBIN domain-containing protein OS=Sus scrofa OX=9823 GN=LOC100737768 PE=1 SV=1	tr|F1RGX4|F1RGX4_PIG		Not present in human	15 kDa	0.21	1.3
Lymphocyte cytosolic protein 1 OS=Sus scrofa OX=9823 GN=LCP1 PE=4 SV=4	tr|F1RK02|F1RK02_PIG	LCP1	P13796	72 kDa	0.21	1.2
Spliceosome associated factor 1, recruiter of U4/U6.U5 tri-snRNP OS=Sus scrofa OX=9823 GN=SART1 PE=1 SV=1	tr|F1RU31|F1RU31_PIG	SART1	O43290	91 kDa	0.21	0.5
Lupus La protein OS=Sus scrofa OX=9823 GN=SSB PE=1 SV=3	tr|F1S1V1|F1S1V1_PIG	SSB	P05455	47 kDa	0.21	0.7
Uncharacterized protein OS=Sus scrofa OX=9823 GN=CD58 PE=1 SV=4	tr|F1SAX5|F1SAX5_PIG			27 kDa	0.21	0.5
Adaptin ear-binding coat-associated protein 2 isoform 1 OS=Sus scrofa OX=9823 GN=NECAP2 PE=1 SV=3	tr|F1SUS2|F1SUS2_PIG	NECAP2	Q8NC96	29 kDa	0.21	0.3
Matrix metallopeptidase 8 OS=Sus scrofa OX=9823 GN=MMP8 PE=3 SV=2	tr|F1SV69|F1SV69_PIG	MMP8	P22894	54 kDa	0.21	0
Polyadenylate-binding protein OS=Sus scrofa OX=9823 GN=PABPC1 PE=3 SV=1	tr|F2Z557|F2Z557_PIG	PABPC1	P11940	71 kDa	0.21	0.7
Small nuclear ribonucleoprotein E OS=Sus scrofa OX=9823 GN=SNRPE PE=3 SV=1	sp|A1XQR9|RUXE_PIG	SNRPE	P62304	11 kDa	0.22	0.5
Fructose-1,6-bisphosphatase 1 OS=Sus scrofa OX=9823 GN=FBP1 PE=1 SV=4	sp|P00636|F16P1_PIG	FBP1	P09467	37 kDa	0.22	1.9
Serotransferrin OS=Sus scrofa OX=9823 GN=TF PE=1 SV=2	sp|P09571|TRFE_PIG	TF	P02787	77 kDa	0.22	1.6
Hemopexin OS=Sus scrofa OX=9823 GN=HPX PE=1 SV=1	sp|P50828|HEMO_PIG	HPX	P02790	51 kDa	0.22	1.9
Translationally-controlled tumor protein OS=Sus scrofa OX=9823 GN=TPT1 PE=2 SV=1	sp|P61288|TCTP_PIG (+2)	TPT1	P13693	20 kDa	0.22	1.9
Metaxin-2 OS=Sus scrofa OX=9823 GN=MTX2 PE=2 SV=1	sp|Q2L969|MTX2_PIG	MTX2	O75431	30 kDa	0.22	0.4
Copper chaperone for superoxide dismutase OS=Sus scrofa OX=9823 GN=CCS PE=2 SV=1	sp|Q6PWT7|CCS_PIG	CCS	O14618	29 kDa	0.22	0
Mannose-1-phosphate guanyltransferase alpha OS=Sus scrofa OX=9823 GN=GMPPA PE=4 SV=3	tr|A0A140TAL0|A0A140TAL0_PIG	GMPPA	Q96IJ6	46 kDa	0.22	0.3
X-ray repair cross complementing 5 OS=Sus scrofa OX=9823 GN=XRCC5 PE=1 SV=1	tr|A0A286ZIV3|A0A286ZIV3_PIG	XRCC5	P13010	95 kDa	0.22	0.4
Ig-like domain-containing protein OS=Sus scrofa OX=9823 PE=4 SV=2	tr|A0A286ZQQ8|A0A286ZQQ8_PIG		Not present in human	19 kDa	0.22	6.3
Serum albumin OS=Sus scrofa OX=9823 GN=ALB PE=1 SV=1	tr|A0A286ZT13|A0A286ZT13_PIG	ALB	P02768	68 kDa	0.22	1.7
Uncharacterized protein OS=Sus scrofa OX=9823 GN=LOC100626015 PE=1 SV=1	tr|A0A286ZXQ5|A0A286ZXQ5_PIG (+2)			130 kDa	0.22	0
ATP synthase subunit delta, mitochondrial OS=Sus scrofa OX=9823 GN=ATP5F1D PE=1 SV=1	tr|A0A286ZYL7|A0A286ZYL7_PIG	ATP5F1D	P30049	17 kDa	0.22	0.5
Maltase-glucoamylase OS=Sus scrofa OX=9823 GN=MGAM PE=1 SV=1	tr|A0A287A042|A0A287A042_PIG	MGAM	O43451	207 kDa	0.22	INF
Cysteine rich protein 2 OS=Sus scrofa OX=9823 GN=CRIP2 PE=1 SV=1	tr|A0A287A2M4|A0A287A2M4_PIG	CRIP2	P52943	25 kDa	0.22	0.6
Heterogeneous nuclear ribonucleoprotein H3 OS=Sus scrofa OX=9823 GN=HNRNPH3 PE=1 SV=1	tr|A0A287A6R2|A0A287A6R2_PIG	HNRNPH3	P31942	37 kDa	0.22	0.7
Histone H2B OS=Sus scrofa OX=9823 PE=3 SV=1	tr|A0A287A7G8|A0A287A7G8_PIG	HIST1H2BC	B2R4S9	17 kDa	0.22	1.6
Lactamase_B domain-containing protein OS=Sus scrofa OX=9823 GN=HAGH PE=1 SV=1	tr|A0A287AAI9|A0A287AAI9_PIG	HAGH	Q16775	29 kDa	0.22	0.3
Occludin OS=Sus scrofa OX=9823 GN=OCLN PE=3 SV=1	tr|A0A287AL69|A0A287AL69_PIG	OCLN	Q16625	60 kDa	0.22	0.5
Pre-mRNA processing factor 31 OS=Sus scrofa OX=9823 GN=PRPF31 PE=1 SV=1	tr|A0A287AMS8|A0A287AMS8_PIG	PRPF31	Q8WWY3	55 kDa	0.22	0.4
Far upstream element binding protein 3 OS=Sus scrofa OX=9823 GN=FUBP3 PE=1 SV=1	tr|A0A287AVF4|A0A287AVF4_PIG	FUBP3	Q96I24	72 kDa	0.22	0.5
Microfibril associated protein 4 OS=Sus scrofa OX=9823 GN=MFAP4 PE=4 SV=1	tr|A0A287AZP0|A0A287AZP0_PIG	MFAP4	P55083	34 kDa	0.22	0.5
UDP-glucuronosyltransferase OS=Sus scrofa OX=9823 GN=UGT2A3 PE=1 SV=2	tr|A0A287B562|A0A287B562_PIG	UGT2A3	Q6UWM9	60 kDa	0.22	0
Neuroplastin OS=Sus scrofa OX=9823 GN=NPTN PE=1 SV=2	tr|A0A287BAZ0|A0A287BAZ0_PIG	NPTN	Q9Y639	41 kDa	0.22	0.6
Serine/threonine-protein phosphatase 2A 56 kDa regulatory subunit OS=Sus scrofa OX=9823 GN=PPP2R5D PE=1 SV=1	tr|A0A287BGB1|A0A287BGB1_PIG	PPP2R5D	Q14738	71 kDa	0.22	0.4
Programmed cell death 10 OS=Sus scrofa OX=9823 GN=PDCD10 PE=1 SV=1	tr|A0A480LEG9|A0A480LEG9_PIG	PDCD10	Q9BUL8	25 kDa	0.22	2.8
Succinate--CoA ligase [ADP/GDP-forming] subunit alpha, mitochondrial OS=Sus scrofa OX=9823 GN=SUCLG1 PE=3 SV=1	tr|A0A5G2QKE5|A0A5G2QKE5_PIG	SUCLG1	P53597	41 kDa	0.22	0.7
Carn_acyltransf domain-containing protein OS=Sus scrofa OX=9823 GN=CPT2 PE=1 SV=1	tr|A0A5G2R8A9|A0A5G2R8A9_PIG	CPT2	P23786	74 kDa	0.22	0.4
Vacuolar protein sorting 33A homolog OS=Sus scrofa OX=9823 GN=VPS33A PE=1 SV=1	tr|A5A780|A5A780_PIG	VPS33A	Q96AX1	68 kDa	0.22	0.3
Nuclear matrix protein 200 OS=Sus scrofa OX=9823 GN=PRPF19 PE=1 SV=1	tr|B2CCY7|B2CCY7_PIG	PRPF19	Q9UMS4	55 kDa	0.22	0.6
Actin-related protein 2/3 complex subunit OS=Sus scrofa OX=9823 GN=ARPC1A PE=3 SV=2	tr|F1REX9|F1REX9_PIG	ARPC1A	Q92747	42 kDa	0.22	0.3
Protein kinase N1 OS=Sus scrofa OX=9823 GN=PKN1 PE=4 SV=3	tr|F1SCG1|F1SCG1_PIG	PKN1	Q16512	104 kDa	0.22	0.4
Glycyl-tRNA synthetase OS=Sus scrofa OX=9823 GN=GARS1 PE=1 SV=2	tr|F1SII4|F1SII4_PIG	GARS1	P41250	84 kDa	0.22	0.6
Prefoldin subunit 3 OS=Sus scrofa OX=9823 GN=VBP1 PE=1 SV=2	tr|K7GNY9|K7GNY9_PIG	VBP1	P61758	27 kDa	0.22	0.5
Prolyl endopeptidase OS=Sus scrofa OX=9823 GN=PREP PE=1 SV=1	sp|P23687|PPCE_PIG	PREP	P48147	81 kDa	0.23	0.7
26S proteasome regulatory subunit 8 OS=Sus scrofa OX=9823 GN=PSMC5 PE=2 SV=1	sp|P62197|PRS8_PIG	PSMC5	P62195	46 kDa	0.23	0.6
Metallothionein-2A OS=Sus scrofa OX=9823 GN=MT2A PE=3 SV=1	sp|P79379|MT2_PIG	MT2A	P02795	6 kDa	0.23	0
Cell division control protein 42 homolog OS=Sus scrofa OX=9823 GN=CDC42 PE=2 SV=2	sp|Q007T2|CDC42_PIG	CDC42	P60953	21 kDa	0.23	0.8
40S ribosomal protein S16 OS=Sus scrofa OX=9823 GN=RPS16 PE=1 SV=4	sp|Q29201|RS16_PIG	RPS16	P62249	16 kDa	0.23	0.7
N-acetylneuraminate lyase OS=Sus scrofa OX=9823 GN=NPL PE=1 SV=1	sp|Q9BEC7|NPL_PIG (+1)	NPL	Q9BXD5	35 kDa	0.23	2.4
Uncharacterized protein OS=Sus scrofa OX=9823 GN=AHNAK PE=1 SV=2	tr|A0A286ZPY1|A0A286ZPY1_PIG			130 kDa	0.23	1.7
SH3 domain-containing protein OS=Sus scrofa OX=9823 GN=LOC110255205 PE=4 SV=2	tr|A0A286ZS98|A0A286ZS98_PIG	SH3PXD2A	Q5TCZ1	37 kDa	0.23	0.4
Chromosome 12 open reading frame 57 OS=Sus scrofa OX=9823 GN=C5H12orf57 PE=1 SV=1	tr|A0A287A018|A0A287A018_PIG		Not present in human	13 kDa	0.23	0.3
Trafficking from ER to golgi regulator OS=Sus scrofa OX=9823 GN=TFG PE=1 SV=2	tr|A0A287AB01|A0A287AB01_PIG (+1)	TFG	Q92734	43 kDa	0.23	0.5
Phosphoglycerate mutase OS=Sus scrofa OX=9823 GN=PGAM1 PE=1 SV=1	tr|A0A287AJQ2|A0A287AJQ2_PIG	PGAM1	P18669	29 kDa	0.23	1.1
6-phosphogluconolactonase OS=Sus scrofa OX=9823 GN=PGLS PE=1 SV=1	tr|A0A287APK0|A0A287APK0_PIG	PGLS	O95336	23 kDa	0.23	0.7
Protein kinase C and casein kinase substrate in neurons 3 OS=Sus scrofa OX=9823 GN=PACSIN3 PE=1 SV=1	tr|A0A287AR93|A0A287AR93_PIG (+1)	PACSIN3	Q9UKS6	49 kDa	0.23	0.1
Cortactin OS=Sus scrofa OX=9823 GN=CTTN PE=1 SV=2	tr|A0A287AUL3|A0A287AUL3_PIG	CTTN	Q14247	72 kDa	0.23	0.7
HDGF like 3 OS=Sus scrofa OX=9823 GN=HDGFL3 PE=1 SV=1	tr|A0A287AUY5|A0A287AUY5_PIG	HDGFL3	Q9Y3E1	23 kDa	0.23	0.5
Dimethylarginine dimethylaminohydrolase 1 OS=Sus scrofa OX=9823 GN=DDAH1 PE=1 SV=1	tr|A0A287B1T7|A0A287B1T7_PIG	DDAH1	O94760	35 kDa	0.23	0.5
Uncharacterized protein OS=Sus scrofa OX=9823 GN=CFH PE=4 SV=1	tr|A0A287BD18|A0A287BD18_PIG			139 kDa	0.23	0.5
Uncharacterized protein OS=Sus scrofa OX=9823 GN=CDH1 PE=1 SV=1	tr|A0A287BPL8|A0A287BPL8_PIG			102 kDa	0.23	0.6
Elongation factor 1-alpha OS=Sus scrofa OX=9823 GN=EEF1A1 PE=1 SV=2	tr|A0A288CG57|A0A288CG57_PIG	EEF1A1	P68104	49 kDa	0.23	0.9
UDP-glucose 4-epimerase OS=Sus scrofa OX=9823 GN=GALE PE=1 SV=1	tr|A0A480P9F6|A0A480P9F6_PIG	GALE	Q14376	38 kDa	0.23	0.1
Prostaglandin reductase 2 OS=Sus scrofa OX=9823 GN=PTGR2 PE=1 SV=1	tr|A0A480YV73|A0A480YV73_PIG	PTGR2	Q8N8N7	38 kDa	0.23	0.5
Mitochondrial amidoxime reducing component 2 OS=Sus scrofa OX=9823 GN=MARC2 PE=1 SV=1	tr|A0A481BCG1|A0A481BCG1_PIG	MARC2	Q969Z3	37 kDa	0.23	0.3
Dihydrolipoamide acetyltransferase component of pyruvate dehydrogenase complex OS=Sus scrofa OX=9823 GN=DBT PE=1 SV=1	tr|A0A5G2QFH7|A0A5G2QFH7_PIG	DBT	P11182	79 kDa	0.23	0
CAP-ZIP_m domain-containing protein OS=Sus scrofa OX=9823 GN=LOC100522401 PE=1 SV=1	tr|A0A5G2R3P4|A0A5G2R3P4_PIG	RCSD1	Q6JBY9	144 kDa	0.23	0.5
Golgi glycoprotein 1 OS=Sus scrofa OX=9823 GN=GLG1 PE=1 SV=1	tr|A0A5G2R7B7|A0A5G2R7B7_PIG	GLG1	Q92896	133 kDa	0.23	0.5
Allograft inflammatory factor 1 OS=Sus scrofa OX=9823 GN=AIF1 PE=1 SV=1	tr|A5D9N3|A5D9N3_PIG	AIF1	P55008	17 kDa	0.23	1.5
3-oxoacyl-[acyl-carrier-protein] synthase, mitochondrial OS=Sus scrofa OX=9823 GN=OXSM PE=3 SV=3	tr|F1RS43|F1RS43_PIG	OXSM	Q9NWU1	49 kDa	0.23	0
Phosphoribosyl pyrophosphate synthetase associated protein 1 OS=Sus scrofa OX=9823 GN=PRPSAP1 PE=1 SV=1	tr|F1RWP0|F1RWP0_PIG	PRPSAP1	Q14558	42 kDa	0.23	0.5
Cellular repressor of E1A stimulated genes 1 OS=Sus scrofa OX=9823 GN=CREG1 PE=1 SV=1	tr|F1S268|F1S268_PIG	CREG1	O75629	24 kDa	0.23	0.5
von Willebrand factor OS=Sus scrofa OX=9823 GN=VWF PE=1 SV=3	tr|F1SL22|F1SL22_PIG	VWF	P04275	322 kDa	0.23	0.7
Elongin B OS=Sus scrofa OX=9823 GN=ELOB PE=1 SV=1	tr|F1SUG4|F1SUG4_PIG	ELOB	Q15370	13 kDa	0.23	0.6
40S ribosomal protein S25 OS=Sus scrofa OX=9823 GN=RPS25 PE=3 SV=3	tr|F2Z5G8|F2Z5G8_PIG	RPS25	P62851	14 kDa	0.23	1.8
Glutamine synthetase OS=Sus scrofa OX=9823 GN=GLUL PE=1 SV=1	tr|F6Q109|F6Q109_PIG	GLUL	P15104	43 kDa	0.23	0
Eukaryotic translation initiation factor 4A2 OS=Sus scrofa OX=9823 GN=EIF4A2 PE=3 SV=2	tr|F6Q8Z7|F6Q8Z7_PIG	EIF4A2	Q14240	47 kDa	0.23	1.2
Uncharacterized protein OS=Sus scrofa OX=9823 GN=FASN PE=1 SV=3	tr|I3LC73|I3LC73_PIG			154 kDa	0.23	0.6
Multifunctional fusion protein OS=Sus scrofa OX=9823 GN=ALDH4A1 PE=1 SV=3	tr|I3LNB4|I3LNB4_PIG	ALDH4A1	P30038	67 kDa	0.23	0.3
Hydroxysteroid 17-beta dehydrogenase 10 OS=Sus scrofa OX=9823 GN=HSD17B10 PE=1 SV=1	tr|K7GP28|K7GP28_PIG	HSD17B10	Q99714	31 kDa	0.23	0.4
Proteasome subunit beta OS=Sus scrofa OX=9823 GN=PSMB9 PE=1 SV=1	tr|Q2PYM7|Q2PYM7_PIG	PSMB9	P28065	23 kDa	0.23	2.5
Mannose-1-phosphate guanyltransferase beta OS=Sus scrofa OX=9823 GN=GMPPB PE=1 SV=1	sp|P0C5I2|GMPPB_PIG	GMPPB	Q9Y5P6	40 kDa	0.24	0.6
Alpha-1-antitrypsin OS=Sus scrofa OX=9823 GN=SERPINA1 PE=2 SV=1	sp|P50447|A1AT_PIG	SERPINA1	P01009	47 kDa	0.24	1.6
Heat shock protein 90 alpha family class B member 1 OS=Sus scrofa OX=9823 GN=HSP90AB1 PE=1 SV=1	tr|A0A286ZKC5|A0A286ZKC5_PIG	HSP90AB1	P08238	95 kDa	0.24	0.7
Transgelin OS=Sus scrofa OX=9823 GN=TAGLN PE=1 SV=1	tr|A0A286ZT82|A0A286ZT82_PIG	TAGLN	Q01995	26 kDa	0.24	1.3
G3BP stress granule assembly factor 1 OS=Sus scrofa OX=9823 GN=G3BP1 PE=4 SV=2	tr|A0A286ZTN5|A0A286ZTN5_PIG	G3BP1	Q13283	55 kDa	0.24	0.7
Terpene cyclase/mutase family member OS=Sus scrofa OX=9823 GN=LSS PE=1 SV=2	tr|A0A286ZU34|A0A286ZU34_PIG	LSS	B2R694	84 kDa	0.24	0.1
Uncharacterized protein OS=Sus scrofa OX=9823 GN=LAMC1 PE=1 SV=2	tr|A0A287A078|A0A287A078_PIG (+1)			178 kDa	0.24	0.6
Ig-like domain-containing protein OS=Sus scrofa OX=9823 PE=4 SV=1	tr|A0A287A3T6|A0A287A3T6_PIG		Not present in human	17 kDa	0.24	INF
DnaJ heat shock protein family (Hsp40) member B2 OS=Sus scrofa OX=9823 GN=DNAJB2 PE=4 SV=2	tr|A0A287A4R7|A0A287A4R7_PIG (+1)	DNAJB2	P25686	33 kDa	0.24	0.5
Electron transfer flavoprotein subunit alpha OS=Sus scrofa OX=9823 GN=ETFA PE=1 SV=1	tr|A0A287A4T2|A0A287A4T2_PIG	ETFA	P13804	35 kDa	0.24	0.5
Short-chain-specific acyl-CoA dehydrogenase, mitochondrial OS=Sus scrofa OX=9823 GN=ACADS PE=3 SV=2	tr|A0A287A8Y8|A0A287A8Y8_PIG	ACADS	P16219	67 kDa	0.24	0.4
Fumarylacetoacetate hydrolase domain-containing protein 2 OS=Sus scrofa OX=9823 GN=LOC100522130 PE=1 SV=1	tr|A0A287AAP0|A0A287AAP0_PIG	FAHD2A	Q96GK7	34 kDa	0.24	0.6
Eukaryotic translation initiation factor 3 subunit F OS=Sus scrofa OX=9823 GN=EIF3F PE=3 SV=1	tr|A0A287ARI1|A0A287ARI1_PIG	EIF3F	O00303	36 kDa	0.24	0.6
Uncharacterized protein OS=Sus scrofa OX=9823 GN=ANK3 PE=4 SV=2	tr|A0A287B9B1|A0A287B9B1_PIG			206 kDa	0.24	0.6
Pyridoxamine 5'-phosphate oxidase OS=Sus scrofa OX=9823 GN=PNPO PE=1 SV=1	tr|A0A287BB89|A0A287BB89_PIG	PNPO	Q9NVS9	30 kDa	0.24	0.3
Acyl-CoA synthetase long chain family member 1 OS=Sus scrofa OX=9823 GN=ACSL1 PE=1 SV=1	tr|A0A287BM44|A0A287BM44_PIG (+1)	ACSL1	P33121	83 kDa	0.24	0.3
LIM domains containing 1 OS=Sus scrofa OX=9823 GN=LIMD1 PE=1 SV=1	tr|A0A5G2Q9T6|A0A5G2Q9T6_PIG	LIMD1	Q9UGP4	70 kDa	0.24	0.5
DAZ associated protein 1 OS=Sus scrofa OX=9823 GN=DAZAP1 PE=1 SV=1	tr|A0A5G2QQX9|A0A5G2QQX9_PIG	DAZAP1	Q96EP5	43 kDa	0.24	0.5
Uncharacterized protein OS=Sus scrofa OX=9823 GN=GRN PE=1 SV=1	tr|A0A5G2R1P5|A0A5G2R1P5_PIG (+1)			71 kDa	0.24	0.6
Acyl-CoA dehydrogenase very long chain OS=Sus scrofa OX=9823 GN=ACADVL PE=1 SV=1	tr|A0A5G2R3E4|A0A5G2R3E4_PIG	ACADVL	P49748	73 kDa	0.24	0.6
Beta-enolase OS=Sus scrofa OX=9823 GN=ENO3 PE=1 SV=1	tr|A0A5G2R7R6|A0A5G2R7R6_PIG	ENO3	P13929	47 kDa	0.24	0.8
B5 domain-containing protein OS=Sus scrofa OX=9823 GN=FARSB PE=1 SV=1	tr|A0A5G2RG03|A0A5G2RG03_PIG (+1)	FARSB	Q9NSD9	67 kDa	0.24	0.7
Potassium channel tetramerization domain containing 12 OS=Sus scrofa OX=9823 GN=KCTD12 PE=1 SV=2	tr|F1RHE6|F1RHE6_PIG	KCTD12	Q96CX2	35 kDa	0.24	1.5
von Willebrand factor A domain containing 1 OS=Sus scrofa OX=9823 GN=VWA1 PE=1 SV=2	tr|F1RJE3|F1RJE3_PIG	VWA1	Q6PCB0	50 kDa	0.24	0.5
Uncharacterized protein OS=Sus scrofa OX=9823 GN=PDLIM2 PE=4 SV=2	tr|F1RMA7|F1RMA7_PIG			38 kDa	0.24	0.7
USO1 vesicle transport factor OS=Sus scrofa OX=9823 GN=USO1 PE=1 SV=3	tr|F1RYU9|F1RYU9_PIG	USO1	O60763	104 kDa	0.24	0.6
Uncharacterized protein OS=Sus scrofa OX=9823 GN=C4BPA PE=1 SV=4	tr|F1S0J2|F1S0J2_PIG			69 kDa	0.24	1.8
NHL repeat containing 2 OS=Sus scrofa OX=9823 GN=NHLRC2 PE=1 SV=2	tr|F1S5H7|F1S5H7_PIG	NHLRC2	Q8NBF2	79 kDa	0.24	0.6
NOP56 ribonucleoprotein OS=Sus scrofa OX=9823 GN=NOP56 PE=1 SV=4	tr|F1S895|F1S895_PIG	NOP56	O00567	66 kDa	0.24	0.7
Protein transport protein SEC23 OS=Sus scrofa OX=9823 GN=SEC23A PE=1 SV=1	tr|F1SHL3|F1SHL3_PIG	SEC23A	Q15436	86 kDa	0.24	0.7
Tropomyosin alpha-1 chain OS=Sus scrofa OX=9823 GN=TPM1 PE=1 SV=3	tr|F2Z5B6|F2Z5B6_PIG	TPM1	P09493	30 kDa	0.24	2.1
Glia maturation factor OS=Sus scrofa OX=9823 GN=GMFB PE=3 SV=2	tr|I3L5V7|I3L5V7_PIG	GMFB	P60983	15 kDa	0.24	0.6
Succinate dehydrogenase [ubiquinone] iron-sulfur subunit, mitochondrial OS=Sus scrofa OX=9823 GN=SDHB PE=1 SV=1	tr|I3LDC1|I3LDC1_PIG	SDHB	P21912	32 kDa	0.24	0.6
Exportin 7 OS=Sus scrofa OX=9823 GN=XPO7 PE=1 SV=2	tr|I3LJC4|I3LJC4_PIG	XPO7	Q9UIA9	125 kDa	0.24	0.6
Aldehyde dehydrogenase 1 family member A1 OS=Sus scrofa OX=9823 GN=ALDH1A1 PE=1 SV=2	tr|I3LRS5|I3LRS5_PIG	ALDH1A1	P14550	55 kDa	0.24	0.4
Dimethylaniline monooxygenase [N-oxide-forming] OS=Sus scrofa OX=9823 GN=FMO3 PE=3 SV=1	tr|I3LS94|I3LS94_PIG	FMO3	P31513	60 kDa	0.24	0.4
Dual specificity mitogen-activated protein kinase kinase 2 OS=Sus scrofa OX=9823 GN=MAP2K2 PE=1 SV=3	tr|K7GPS0|K7GPS0_PIG	MAP2K2	P36507	44 kDa	0.24	0.6
Glyceraldehyde-3-phosphate dehydrogenase OS=Sus scrofa OX=9823 GN=GAPDH PE=1 SV=4	sp|P00355|G3P_PIG	GAPDH	P04406	36 kDa	0.25	1.1
Major prion protein OS=Sus scrofa OX=9823 GN=PRNP PE=1 SV=1	sp|P49927|PRIO_PIG (+1)	PRNP	P04156	28 kDa	0.25	0.3
Destrin OS=Sus scrofa OX=9823 GN=DSTN PE=1 SV=3	sp|P60982|DEST_PIG	DSTN	P60981	19 kDa	0.25	0.7
Propionyl-CoA carboxylase beta chain, mitochondrial OS=Sus scrofa OX=9823 GN=PCCB PE=1 SV=1	sp|P79384|PCCB_PIG	PCCB	P05166	59 kDa	0.25	0.2
Carbonic anhydrase 3 OS=Sus scrofa OX=9823 GN=CA3 PE=2 SV=3	sp|Q5S1S4|CAH3_PIG	CA3	P07451	29 kDa	0.25	0
Ras-related protein Rab-1B OS=Sus scrofa OX=9823 GN=KLC2 PE=4 SV=2	tr|A0A286ZJ53|A0A286ZJ53_PIG	KLC2	Q9H0U4	36 kDa	0.25	1.3
Olfactomedin-like domain-containing protein OS=Sus scrofa OX=9823 GN=OLFML1 PE=1 SV=1	tr|A0A286ZY90|A0A286ZY90_PIG	OLFML1	Q6UWY5	25 kDa	0.25	1.6
Cullin 3 OS=Sus scrofa OX=9823 GN=CUL3 PE=1 SV=2	tr|A0A287A2J9|A0A287A2J9_PIG	CUL3	Q13618	90 kDa	0.25	2.1
Carboxymethylenebutenolidase homolog OS=Sus scrofa OX=9823 GN=CMBL PE=1 SV=1	tr|A0A287A6V9|A0A287A6V9_PIG	CMBL	Q96DG6	28 kDa	0.25	0.3
G protein subunit beta 1 OS=Sus scrofa OX=9823 GN=GNB1 PE=4 SV=1	tr|A0A287A7Q3|A0A287A7Q3_PIG	GNB1	P62873	37 kDa	0.25	0.7
C-type lectin domain-containing protein OS=Sus scrofa OX=9823 GN=LOC110259263 PE=4 SV=1	tr|A0A287AEW5|A0A287AEW5_PIG		F5H6K3	20 kDa	0.25	0
Small nuclear ribonucleoprotein U1 subunit 70 OS=Sus scrofa OX=9823 GN=SNRNP70 PE=1 SV=2	tr|A0A287AJ85|A0A287AJ85_PIG	SNRNP70	P08621	51 kDa	0.25	0.6
Platelet activating factor acetylhydrolase 1b catalytic subunit 2 OS=Sus scrofa OX=9823 GN=PAFAH1B2 PE=1 SV=1	tr|A0A287ALL0|A0A287ALL0_PIG	PAFAH1B2	P68402	26 kDa	0.25	1.2
Family with sequence similarity 192 member A OS=Sus scrofa OX=9823 GN=PSME3IP1 PE=4 SV=2	tr|A0A287AR42|A0A287AR42_PIG (+1)	PSME3IP1	Q9GZU8	29 kDa	0.25	0.3
Tropomyosin alpha-1 chain OS=Sus scrofa OX=9823 GN=TPM1 PE=1 SV=2	tr|A0A287B5N7|A0A287B5N7_PIG	TPM1	P09493	40 kDa	0.25	1.7
Dual specificity mitogen-activated protein kinase kinase 1 OS=Sus scrofa OX=9823 GN=MAP2K1 PE=1 SV=1	tr|A0A287BK75|A0A287BK75_PIG	MAP2K1	Q02750	43 kDa	0.25	2.5
Sulfurtransferase OS=Sus scrofa OX=9823 GN=TST PE=1 SV=2	tr|A0A287BPT5|A0A287BPT5_PIG	TST	Q16762	39 kDa	0.25	0.4
NADH dehydrogenase [ubiquinone] 1 subunit C2 OS=Sus scrofa OX=9823 GN=NDUFC2 PE=1 SV=1	tr|A0A480JRW3|A0A480JRW3_PIG	NDUFC2	O95298	14 kDa	0.25	0.4
Peptidylprolyl isomerase OS=Sus scrofa OX=9823 GN=FKBP15 PE=1 SV=1	tr|A0A5G2QLL8|A0A5G2QLL8_PIG	FKBP15	Q5T1M5	113 kDa	0.25	0.3
CD44 molecule (Indian blood group) OS=Sus scrofa OX=9823 GN=CD44 PE=1 SV=1	tr|A0A5G2QN76|A0A5G2QN76_PIG	CD44	P16070	50 kDa	0.25	1.9
Chaperonin containing TCP1 subunit 5 OS=Sus scrofa OX=9823 GN=CCT5 PE=1 SV=1	tr|A0A5G2QVV0|A0A5G2QVV0_PIG (+1)	CCT5	P48643	62 kDa	0.25	0.7
Fumarate hydratase, mitochondrial OS=Sus scrofa OX=9823 GN=FH PE=4 SV=1	tr|A0A5S8M9X9|A0A5S8M9X9_PIG	FH	P07954	50 kDa	0.25	0.7
SWI/SNF related, matrix associated, actin dependent regulator of chromatin, subfamily e, member 1 OS=Sus scrofa OX=9823 GN=SMARCE1 PE=1 SV=3	tr|F1RXE6|F1RXE6_PIG	SMARCE1	Q969G3	47 kDa	0.25	0.3
Eukaryotic translation initiation factor 3 subunit H OS=Sus scrofa OX=9823 GN=EIF3H PE=1 SV=2	tr|F1S1J9|F1S1J9_PIG	EIF3H	O15372	37 kDa	0.25	2.9
Glutaredoxin 5 OS=Sus scrofa OX=9823 GN=GLRX5 PE=1 SV=1	tr|F1SAR5|F1SAR5_PIG	GLRX5	Q86SX6	17 kDa	0.25	0.3
Lumican OS=Sus scrofa OX=9823 GN=LUM PE=1 SV=1	tr|F1SQ09|F1SQ09_PIG	LUM	P51884	39 kDa	0.25	1.4
Aconitate hydratase, mitochondrial OS=Sus scrofa OX=9823 GN=ACO2 PE=1 SV=3	tr|F1SRC5|F1SRC5_PIG	ACO2	Q99798	85 kDa	0.25	0.3
Lymphatic vessel endothelial hyaluronan receptor 1 OS=Sus scrofa OX=9823 GN=LYVE1 PE=1 SV=2	tr|I3LTD0|I3LTD0_PIG	LYVE1	Q9Y5Y7	36 kDa	0.25	2.5
Dedicator of cytokinesis 10 OS=Sus scrofa OX=9823 GN=DOCK10 PE=3 SV=3	tr|I3LU05|I3LU05_PIG	DOCK10	Q96BY6	250 kDa	0.25	0.3
Apolipoprotein A-I OS=Sus scrofa OX=9823 GN=APOA1 PE=3 SV=2	tr|K7GM40|K7GM40_PIG	APOA1	P02647	30 kDa	0.25	2.1
Protogenin isoform X1 OS=Sus scrofa OX=9823 GN=SNRNP200 PE=1 SV=1	tr|K9J4V0|K9J4V0_PIG	SNRNP200	O75643	245 kDa	0.25	0.6
Myeloid derived growth factor OS=Sus scrofa OX=9823 GN=MYDGF PE=2 SV=1	tr|M3UZ63|M3UZ63_PIG	MYDGF	Q969H8	19 kDa	0.25	0.6
Ferritin light chain (Fragment) OS=Sus scrofa OX=9823 GN=FTL PE=1 SV=1	sp|P19133|FRIL_PIG	FTL	P02792	9 kDa	0.26	0.4
NPC intracellular cholesterol transporter 1 OS=Sus scrofa OX=9823 GN=NPC1 PE=2 SV=1	sp|P56941|NPC1_PIG	NPC1	O15118	142 kDa	0.26	0.3
Protein S100-A12 OS=Sus scrofa OX=9823 GN=S100A12 PE=1 SV=2	sp|P80310|S10AC_PIG	S100A12	P80511	11 kDa	0.26	5.4
Ras-related protein Rab-27A OS=Sus scrofa OX=9823 GN=RAB27A PE=2 SV=1	sp|Q4LE85|RB27A_PIG (+1)	RAB27A	P51159	25 kDa	0.26	6.1
40S ribosomal protein S23 OS=Sus scrofa OX=9823 GN=RPS23 PE=1 SV=3	sp|Q6SA96|RS23_PIG (+1)	RPS23	P62266	16 kDa	0.26	0.4
Choline transporter-like protein 2 OS=Sus scrofa OX=9823 GN=SLC44A2 PE=1 SV=1	tr|A0A286ZK56|A0A286ZK56_PIG	SLC44A2	Q8IWA5	75 kDa	0.26	2.7
Protein S100 OS=Sus scrofa OX=9823 GN=LOC110258323 PE=1 SV=1	tr|A0A286ZP11|A0A286ZP11_PIG	S100B	A0A0S2Z4C5	15 kDa	0.26	1.9
Stomatin like 2 OS=Sus scrofa OX=9823 GN=STOML2 PE=1 SV=1	tr|A0A286ZSD7|A0A286ZSD7_PIG	STOML2	Q9UJZ1	39 kDa	0.26	0.7
Transmembrane emp24 domain-containing protein 10 OS=Sus scrofa OX=9823 GN=TMED10 PE=1 SV=1	tr|A0A286ZV95|A0A286ZV95_PIG	TMED10	P49755	25 kDa	0.26	0.7
3'-phosphoadenosine 5'-phosphosulfate synthase 1 OS=Sus scrofa OX=9823 GN=PAPSS1 PE=3 SV=1	tr|A0A287A7F4|A0A287A7F4_PIG	PAPSS1	O43252	90 kDa	0.26	0.5
V-set and immunoglobulin domain containing 4 OS=Sus scrofa OX=9823 GN=VSIG4 PE=4 SV=1	tr|A0A287AEY7|A0A287AEY7_PIG (+3)	VSIG4	Q9Y279	44 kDa	0.26	0.3
EGF containing fibulin extracellular matrix protein 1 OS=Sus scrofa OX=9823 GN=EFEMP1 PE=1 SV=1	tr|A0A287AP71|A0A287AP71_PIG (+2)	EFEMP1	Q12805	56 kDa	0.26	0.6
Cytokine receptor like factor 3 OS=Sus scrofa OX=9823 GN=CRLF3 PE=1 SV=2	tr|A0A287B1U0|A0A287B1U0_PIG (+2)	CRLF3	Q8IUI8	49 kDa	0.26	0.5
Uncharacterized protein OS=Sus scrofa OX=9823 GN=SET PE=1 SV=1	tr|A0A5G2QBC5|A0A5G2QBC5_PIG			41 kDa	0.26	1.6
S10_plectin domain-containing protein OS=Sus scrofa OX=9823 GN=RPS10 PE=1 SV=1	tr|A0A5G2QEC7|A0A5G2QEC7_PIG	RPS10	P46783	21 kDa	0.26	0.5
BPTI/Kunitz inhibitor domain-containing protein OS=Sus scrofa OX=9823 GN=LOC100158011 PE=1 SV=1	tr|A0A5G2QN91|A0A5G2QN91_PIG	WFIKKN1	Q96NZ8	14 kDa	0.26	3
Serine hydroxymethyltransferase OS=Sus scrofa OX=9823 GN=SHMT2 PE=1 SV=1	tr|A0A5G2R6D0|A0A5G2R6D0_PIG	SHMT2	P34897	53 kDa	0.26	0.1
Uncharacterized protein OS=Sus scrofa OX=9823 GN=GGCT PE=1 SV=1	tr|A0A5G2R9Y8|A0A5G2R9Y8_PIG			21 kDa	0.26	0.2
Aldehyde dehydrogenase 6 family member A1 OS=Sus scrofa OX=9823 GN=ALDH6A1 PE=1 SV=1	tr|A0A5G2RA17|A0A5G2RA17_PIG (+1)	ALDH6A1	Q02252	56 kDa	0.26	0.2
Monocyte differentiation antigen CD14 OS=Sus scrofa OX=9823 GN=CD14 PE=1 SV=1	tr|A2SW51|A2SW51_PIG	CD14	P08571	40 kDa	0.26	0.7
Rho GDP dissociation inhibitor alpha OS=Sus scrofa OX=9823 GN=ARHGDIA PE=2 SV=1	tr|E7EI20|E7EI20_PIG	ARHGDIA	P52565	23 kDa	0.26	1.2
Histidine triad nucleotide binding protein 1 OS=Sus scrofa OX=9823 GN=HINT1 PE=1 SV=1	tr|F1RKI3|F1RKI3_PIG	HINT1	P49773	14 kDa	0.26	0.6
Isochorismatase domain containing 1 OS=Sus scrofa OX=9823 GN=ISOC1 PE=4 SV=2	tr|F1RKJ9|F1RKJ9_PIG	ISOC1	Q96CN7	31 kDa	0.26	0.7
ATP binding cassette subfamily A member 9 OS=Sus scrofa OX=9823 GN=ABCA9 PE=1 SV=3	tr|F1RV25|F1RV25_PIG (+1)	ABCA9	Q8IUA7	179 kDa	0.26	4.8
IQ motif containing GTPase activating protein 2 OS=Sus scrofa OX=9823 GN=IQGAP2 PE=1 SV=4	tr|F1S2H7|F1S2H7_PIG	IQGAP2	Q13576	169 kDa	0.26	0.2
Corticosteroid 11-beta-dehydrogenase isozyme 1 OS=Sus scrofa OX=9823 GN=HSD11B1 PE=1 SV=3	tr|F1SF47|F1SF47_PIG	HSD11B1	P28845	32 kDa	0.26	0.4
NADH dehydrogenase [ubiquinone] 1 alpha subcomplex subunit 12 OS=Sus scrofa OX=9823 GN=NDUFA12 PE=1 SV=2	tr|F1SQP4|F1SQP4_PIG	NDUFA12	Q9UI09	17 kDa	0.26	0.5
Isopentenyl-diphosphate delta isomerase 1 OS=Sus scrofa OX=9823 GN=IDI1 PE=4 SV=2	tr|I3LDY2|I3LDY2_PIG	IDI1	Q13907	27 kDa	0.26	0.1
UDP-glucose 6-dehydrogenase OS=Sus scrofa OX=9823 GN=UGDH PE=1 SV=1	tr|I3LIM2|I3LIM2_PIG	UGDH	O60701	55 kDa	0.26	0.4
Ras homolog family member A OS=Sus scrofa OX=9823 GN=RHOA PE=1 SV=1	tr|I3LVS7|I3LVS7_PIG	RHOA	P61586	22 kDa	0.26	0.8
Sodium/potassium-transporting ATPase subunit beta-1 OS=Sus scrofa OX=9823 GN=ATP1B1 PE=1 SV=2	sp|P05027|AT1B1_PIG	ATP1B1	P05026	35 kDa	0.27	0.5
Transthyretin OS=Sus scrofa OX=9823 GN=TTR PE=1 SV=1	sp|P50390|TTHY_PIG (+1)	TTR	P02766	16 kDa	0.27	1.8
4-trimethylaminobutyraldehyde dehydrogenase OS=Sus scrofa OX=9823 GN=ALDH9A1 PE=2 SV=2	sp|Q29228|AL9A1_PIG	ALDH9A1	P49189	54 kDa	0.27	0.6
Guanine nucleotide-binding protein G(q) subunit alpha OS=Sus scrofa OX=9823 GN=GNAQ PE=2 SV=3	sp|Q2PKF4|GNAQ_PIG	GNAQ	P50148	42 kDa	0.27	0.7
Tubulin alpha-1B chain OS=Sus scrofa OX=9823 GN=TUBA1B PE=1 SV=1	sp|Q2XVP4|TBA1B_PIG	TUBA1B	P68363	50 kDa	0.27	1.3
IlvB acetolactate synthase like OS=Sus scrofa OX=9823 GN=ILVBL PE=3 SV=2	tr|A0A286ZIW5|A0A286ZIW5_PIG	ILVBL	A1L0T0	70 kDa	0.27	0.2
Spectrin beta chain OS=Sus scrofa OX=9823 GN=SPTBN2 PE=3 SV=1	tr|A0A286ZNA8|A0A286ZNA8_PIG	SPTBN2	O15020	270 kDa	0.27	0.2
Filamin B OS=Sus scrofa OX=9823 GN=FLNB PE=1 SV=1	tr|A0A286ZPG4|A0A286ZPG4_PIG (+1)	FLNB	O75369	279 kDa	0.27	0.7
FCH domain only 2 OS=Sus scrofa OX=9823 GN=FCHO2 PE=4 SV=1	tr|A0A286ZT03|A0A286ZT03_PIG (+3)	FCHO2	Q0JRZ9	83 kDa	0.27	0.2
CRK proto-oncogene, adaptor protein OS=Sus scrofa OX=9823 GN=CRK PE=1 SV=1	tr|A0A287A2R9|A0A287A2R9_PIG	CRK	P46108	29 kDa	0.27	1.2
T-complex protein 1 subunit gamma OS=Sus scrofa OX=9823 GN=CCT3 PE=1 SV=1	tr|A0A287AMZ2|A0A287AMZ2_PIG	CCT3	P49368	61 kDa	0.27	0.7
Uncharacterized protein OS=Sus scrofa OX=9823 GN=HSPD1 PE=1 SV=1	tr|A0A287ATN8|A0A287ATN8_PIG			50 kDa	0.27	0.6
ATP synthase subunit d, mitochondrial OS=Sus scrofa OX=9823 GN=ATP5PD PE=1 SV=1	tr|A0A287B0C3|A0A287B0C3_PIG	ATP5PD	O75947	20 kDa	0.27	0.7
Neutral alpha-glucosidase AB OS=Sus scrofa OX=9823 GN=GANAB PE=1 SV=1	tr|A0A287B1C9|A0A287B1C9_PIG (+1)	GANAB	Q14697	110 kDa	0.27	0.7
Cold shock domain containing E1 OS=Sus scrofa OX=9823 GN=CSDE1 PE=1 SV=1	tr|A0A287B2T9|A0A287B2T9_PIG (+1)	CSDE1	O75534	94 kDa	0.27	0.5
Uncharacterized protein OS=Sus scrofa OX=9823 GN=RAB35 PE=1 SV=1	tr|A0A287BFE6|A0A287BFE6_PIG			23 kDa	0.27	0.5
Alpha-galactosidase OS=Sus scrofa OX=9823 GN=NAGA PE=3 SV=1	tr|A0A287BPG3|A0A287BPG3_PIG	NAGA	P17050	44 kDa	0.27	2.3
ENAH actin regulator OS=Sus scrofa OX=9823 GN=ENAH PE=1 SV=1	tr|A0A5G2QNU8|A0A5G2QNU8_PIG	ENAH	Q8N8S7	64 kDa	0.27	0.5
Eukaryotic translation initiation factor 3 subunit J OS=Sus scrofa OX=9823 GN=EIF3J PE=1 SV=1	tr|A0A5G2R3H6|A0A5G2R3H6_PIG	EIF3J	O75822	29 kDa	0.27	0.8
Sorting nexin 3 OS=Sus scrofa OX=9823 GN=SNX3 PE=1 SV=1	tr|A0A5G2R4Z1|A0A5G2R4Z1_PIG	SNX3	O60493	19 kDa	0.27	0.7
Uncharacterized protein OS=Sus scrofa OX=9823 GN=DECR1 PE=1 SV=1	tr|A0A5G2R5W7|A0A5G2R5W7_PIG			38 kDa	0.27	0.3
Eukaryotic translation initiation factor 3 subunit D OS=Sus scrofa OX=9823 GN=EIF3D PE=1 SV=1	tr|A0A5G2R9Q2|A0A5G2R9Q2_PIG	EIF3D	O15371	64 kDa	0.27	0.6
U6 snRNA-associated Sm-like protein LSm4 OS=Sus scrofa OX=9823 GN=LSM4 PE=3 SV=1	tr|A0A5G2RE37|A0A5G2RE37_PIG	LSM4	Q9Y4Z0	21 kDa	0.27	0.5
Mitochondrial pyruvate carrier OS=Sus scrofa OX=9823 GN=MPC2 PE=1 SV=1	tr|A0A5G2REE1|A0A5G2REE1_PIG (+1)	MPC2	O95563	14 kDa	0.27	0.6
Xaa-Pro aminopeptidase 2 OS=Sus scrofa OX=9823 GN=XPNPEP2 PE=3 SV=1	tr|A0A5S6GBB0|A0A5S6GBB0_PIG	XPNPEP2	O43895	75 kDa	0.27	0.6
CDK5 regulatory subunit associated protein 3 OS=Sus scrofa OX=9823 GN=CDK5RAP3 PE=1 SV=3	tr|F1RWH6|F1RWH6_PIG	CDK5RAP3	Q96JB5	57 kDa	0.27	0.6
Syntaxin binding protein 3 OS=Sus scrofa OX=9823 GN=STXBP3 PE=3 SV=2	tr|F1S580|F1S580_PIG	STXBP3	O00186	108 kDa	0.27	0.6
Pyrroline-5-carboxylate reductase OS=Sus scrofa OX=9823 GN=PYCR2 PE=3 SV=3	tr|F1S8R2|F1S8R2_PIG	PYCR2	Q96C36	34 kDa	0.27	0.3
Ras interacting protein 1 OS=Sus scrofa OX=9823 GN=RASIP1 PE=1 SV=3	tr|I3LIC8|I3LIC8_PIG	RASIP1	Q5U651	104 kDa	0.27	0.5
3-hydroxy-3-methylglutaryl-CoA lyase OS=Sus scrofa OX=9823 GN=HMGCL PE=4 SV=3	tr|I3LIL5|I3LIL5_PIG	HMGCL	P35914	40 kDa	0.27	0.2
Major vault protein OS=Sus scrofa OX=9823 GN=MVP PE=1 SV=2	tr|I3LQ79|I3LQ79_PIG	MVP	Q14764	100 kDa	0.27	0.6
Cytochrome c oxidase subunit 6C OS=Sus scrofa OX=9823 GN=COX6C PE=3 SV=1	sp|A1XQT2|COX6C_PIG	COX6C	P09669	9 kDa	0.28	4.7
Guanylate kinase OS=Sus scrofa OX=9823 GN=GUK1 PE=1 SV=2	sp|P31006|KGUA_PIG (+1)	GUK1	Q16774	22 kDa	0.28	4.3
Peptidyl-prolyl cis-trans isomerase A OS=Sus scrofa OX=9823 GN=PPIA PE=1 SV=2	sp|P62936|PPIA_PIG	PPIA	P62937	18 kDa	0.28	0.9
UTP--glucose-1-phosphate uridylyltransferase OS=Sus scrofa OX=9823 GN=UGP2 PE=2 SV=3	sp|P79303|UGPA_PIG	UGP2	Q16851	57 kDa	0.28	0.3
Prostaglandin reductase 1 OS=Sus scrofa OX=9823 GN=PTGR1 PE=1 SV=1	sp|Q29073|PTGR1_PIG (+1)	PTGR1	Q14914	36 kDa	0.28	0.3
EWS RNA binding protein 1 OS=Sus scrofa OX=9823 GN=EWSR1 PE=1 SV=2	tr|A0A286ZXI2|A0A286ZXI2_PIG	EWSR1	Q01844	63 kDa	0.28	0.7
Chondroadherin OS=Sus scrofa OX=9823 GN=CHAD PE=4 SV=1	tr|A0A287A461|A0A287A461_PIG	CHAD	O15335	41 kDa	0.28	0
Core histone macro-H2A OS=Sus scrofa OX=9823 GN=MACROH2A2 PE=1 SV=1	tr|A0A287AKA3|A0A287AKA3_PIG	MACROH2A2	Q9P0M6	40 kDa	0.28	2.9
Nicotinamide nucleotide transhydrogenase OS=Sus scrofa OX=9823 GN=NNT PE=1 SV=1	tr|A0A287B1U9|A0A287B1U9_PIG	NNT	Q13423	117 kDa	0.28	0.5
Dual specificity protein phosphatase OS=Sus scrofa OX=9823 GN=DUSP3 PE=1 SV=1	tr|A0A480UG54|A0A480UG54_PIG	DUSP3	P51452	21 kDa	0.28	0.6
Hydroxysteroid dehydrogenase like 2 OS=Sus scrofa OX=9823 GN=HSDL2 PE=1 SV=1	tr|A0A5G2R0Z8|A0A5G2R0Z8_PIG	HSDL2	Q6YN16	45 kDa	0.28	0.2
Nexilin F-actin binding protein OS=Sus scrofa OX=9823 GN=NEXN PE=1 SV=1	tr|A0A5G2R2Q2|A0A5G2R2Q2_PIG	NEXN	Q0ZGT2	76 kDa	0.28	1.4
Palladin isoform X1 OS=Sus scrofa OX=9823 GN=PALLD PE=1 SV=2	tr|F1RIW3|F1RIW3_PIG	PALLD	Q8WX93	142 kDa	0.28	0.6
Cleavage stimulation factor subunit 2 OS=Sus scrofa OX=9823 GN=CSTF2 PE=1 SV=3	tr|F1S1L9|F1S1L9_PIG	CSTF2	P33240	60 kDa	0.28	0.3
Tubulin polymerization promoting protein family member 3 OS=Sus scrofa OX=9823 GN=TPPP3 PE=4 SV=2	tr|F1S2I8|F1S2I8_PIG	TPPP3	Q9BW30	19 kDa	0.28	1.5
Endothelial cell adhesion molecule OS=Sus scrofa OX=9823 GN=ESAM PE=1 SV=3	tr|F1S798|F1S798_PIG	ESAM	Q96AP7	41 kDa	0.28	0.6
Selenocysteine lyase OS=Sus scrofa OX=9823 GN=SCLY PE=1 SV=4	tr|F1SJI1|F1SJI1_PIG	SCLY	Q96I15	49 kDa	0.28	0.3
Proteasome subunit alpha type OS=Sus scrofa OX=9823 GN=PSMA2 PE=1 SV=1	tr|I3LAB6|I3LAB6_PIG	PSMA2	P25787	26 kDa	0.28	1.4
Fatty acid-binding protein, adipocyte OS=Sus scrofa OX=9823 GN=FABP4 PE=1 SV=3	sp|O97788|FABP4_PIG	FABP4	P15090	15 kDa	0.29	0.3
Plasminogen OS=Sus scrofa OX=9823 GN=PLG PE=1 SV=3	sp|P06867|PLMN_PIG	PLG	P00747	91 kDa	0.29	0.6
Epoxide hydrolase 1 OS=Sus scrofa OX=9823 GN=EPHX1 PE=2 SV=1	sp|P79381|HYEP_PIG	EPHX1	P07099	52 kDa	0.29	0.4
Sorbitol dehydrogenase (Fragment) OS=Sus scrofa OX=9823 GN=SORD PE=2 SV=2	sp|Q29318|DHSO_PIG	SORD	Q00796	10 kDa	0.29	0
Deleted in malignant brain tumors 1 protein OS=Sus scrofa OX=9823 GN=DMBT1 PE=2 SV=1	sp|Q4A3R3|DMBT1_PIG	DMBT1	Q9UGM3	132 kDa	0.29	0
Hepatocyte growth factor-regulated tyrosine kinase substrate OS=Sus scrofa OX=9823 GN=HGS PE=1 SV=2	tr|A0A286ZKS6|A0A286ZKS6_PIG (+1)	HGS	O14964	84 kDa	0.29	2.1
Ribosomal protein L23a OS=Sus scrofa OX=9823 GN=RPL23A PE=1 SV=2	tr|A0A286ZL51|A0A286ZL51_PIG	RPL23A	P62750	18 kDa	0.29	4.1
Peroxiredoxin OS=Sus scrofa OX=9823 GN=PRDX1 PE=1 SV=1	tr|A0A286ZND5|A0A286ZND5_PIG	PRDX1	Q06830	25 kDa	0.29	1.1
Adducin 1 OS=Sus scrofa OX=9823 GN=ADD1 PE=1 SV=2	tr|A0A286ZR45|A0A286ZR45_PIG	ADD1	P35611	86 kDa	0.29	0.7
Hexose-6-phosphate dehydrogenase/glucose 1-dehydrogenase OS=Sus scrofa OX=9823 GN=H6PD PE=4 SV=2	tr|A0A286ZYN1|A0A286ZYN1_PIG (+2)	H6PD	O95479	89 kDa	0.29	0.3
Synapse-associated protein 1 OS=Sus scrofa OX=9823 GN=SYAP1 PE=1 SV=1	tr|A0A287AX76|A0A287AX76_PIG	SYAP1	Q96A49	41 kDa	0.29	0.6
V-type proton ATPase subunit C OS=Sus scrofa OX=9823 GN=ATP6V1C1 PE=1 SV=1	tr|A0A287AXI2|A0A287AXI2_PIG (+1)	ATP6V1C1	P21283	44 kDa	0.29	0.4
NAD-dependent protein deacetylase OS=Sus scrofa OX=9823 GN=SIRT2 PE=1 SV=1	tr|A0A287B4T1|A0A287B4T1_PIG (+1)	SIRT2	Q8IXJ6	43 kDa	0.29	0.6
Heterogeneous nuclear ribonucleoprotein K isoform c OS=Sus scrofa OX=9823 GN=HNRNPK PE=1 SV=2	tr|A0A287B646|A0A287B646_PIG	HNRNPK	P61978	49 kDa	0.29	1.2
Collagen type XIV alpha 1 chain OS=Sus scrofa OX=9823 GN=COL14A1 PE=1 SV=1	tr|A0A287BGV6|A0A287BGV6_PIG	COL14A1	Q05707	191 kDa	0.29	0.7
S5A_REDUCTASE domain-containing protein OS=Sus scrofa OX=9823 GN=TECR PE=1 SV=2	tr|A0A287BMG2|A0A287BMG2_PIG		Not present in human	52 kDa	0.29	0.5
SAM and HD domain containing deoxynucleoside triphosphate triphosphohydrolase 1 OS=Sus scrofa OX=9823 GN=SAMHD1 PE=1 SV=1	tr|A0A5G2Q7I5|A0A5G2Q7I5_PIG (+1)	SAMHD1	Q9Y3Z3	68 kDa	0.29	0.6
Catechol O-methyltransferase OS=Sus scrofa OX=9823 GN=COMT PE=1 SV=1	tr|A0A5G2QXV8|A0A5G2QXV8_PIG	COMT	P21964	30 kDa	0.29	0.5
U4/U6.U5 tri-snRNP-associated protein 2 OS=Sus scrofa OX=9823 GN=USP39 PE=1 SV=1	tr|A0A5G2RBP5|A0A5G2RBP5_PIG (+1)	USP39	Q53GS9	65 kDa	0.29	0.6
Interleukin enhancer binding factor 2 OS=Sus scrofa OX=9823 GN=ILF2 PE=1 SV=1	tr|A0A5G2RJR2|A0A5G2RJR2_PIG	ILF2	Q12905	44 kDa	0.29	0.7
Triosephosphate isomerase OS=Sus scrofa OX=9823 GN=TPI1 PE=1 SV=1	tr|D0G7F6|D0G7F6_PIG	TPI1	P60174	27 kDa	0.29	0.9
Signal transducer and activator of transcription OS=Sus scrofa OX=9823 GN=STAT6 PE=2 SV=1	tr|E5F1H4|E5F1H4_PIG	STAT6	P42226	94 kDa	0.29	0.5
Enoyl-CoA hydratase domain containing 3 OS=Sus scrofa OX=9823 GN=ECHDC3 PE=1 SV=3	tr|F1RUP0|F1RUP0_PIG	ECHDC3	Q96DC8	25 kDa	0.29	0
UDP-glucuronosyltransferase OS=Sus scrofa OX=9823 GN=UGT2B31 PE=3 SV=4	tr|F1RUR0|F1RUR0_PIG	UGT2B31	Q5DSZ7	61 kDa	0.29	0
Fibrillar collagen NC1 domain-containing protein OS=Sus scrofa OX=9823 GN=COL5A1 PE=1 SV=4	tr|F1S021|F1S021_PIG	COL5A1	P20908	192 kDa	0.29	0.5
Fibromodulin OS=Sus scrofa OX=9823 GN=FMOD PE=1 SV=3	tr|F1S6B5|F1S6B5_PIG	FMOD	Q06828	43 kDa	0.29	0.3
Flavin-containing monooxygenase OS=Sus scrofa OX=9823 GN=FMO5 PE=3 SV=3	tr|F1SDB7|F1SDB7_PIG	FMO5	P49326	47 kDa	0.29	0.3
Acyl-CoA dehydrogenase short/branched chain OS=Sus scrofa OX=9823 GN=ACADSB PE=1 SV=4	tr|F1SED0|F1SED0_PIG	ACADSB	P45954	47 kDa	0.29	0.2
Glutamate dehydrogenase 1, mitochondrial OS=Sus scrofa OX=9823 GN=GLUD1 PE=1 SV=1	tr|F1SEN2|F1SEN2_PIG	GLUD1	P00367	61 kDa	0.29	0.4
Reticulocalbin-1 OS=Sus scrofa OX=9823 GN=RCN1 PE=1 SV=3	tr|F1SGP8|F1SGP8_PIG	RCN1	Q15293	47 kDa	0.29	0.7
Dynactin subunit 2 OS=Sus scrofa OX=9823 GN=DCTN2 PE=1 SV=3	tr|F1SL58|F1SL58_PIG	DCTN2	Q13561	45 kDa	0.29	1.3
Exosome RNA helicase MTR4 OS=Sus scrofa OX=9823 GN=MTREX PE=1 SV=3	tr|F1SLL6|F1SLL6_PIG	MTREX	P42285	118 kDa	0.29	2.3
Glutathione S-transferase kappa OS=Sus scrofa OX=9823 GN=GSTK1 PE=1 SV=1	tr|F1SRV4|F1SRV4_PIG	GSTK1	Q9Y2Q3	25 kDa	0.29	0.3
Zyxin OS=Sus scrofa OX=9823 GN=ZYX PE=1 SV=1	tr|F1SRV9|F1SRV9_PIG	ZYX	Q15942	61 kDa	0.29	0.6
Matrilin 1 OS=Sus scrofa OX=9823 GN=MATN1 PE=4 SV=3	tr|I3L5Q7|I3L5Q7_PIG	MATN1	P21941	54 kDa	0.29	0
Amine oxidase OS=Sus scrofa OX=9823 GN=MAOB PE=1 SV=2	tr|K7GKH7|K7GKH7_PIG	MAOB	Q8TBI1	57 kDa	0.29	0.5
L-lactate dehydrogenase B chain OS=Sus scrofa OX=9823 GN=LDHB PE=1 SV=3	sp|P00336|LDHB_PIG	LDHB	P07195	37 kDa	0.3	1.5
Interleukin-1 receptor antagonist protein OS=Sus scrofa OX=9823 GN=IL1RN PE=2 SV=1	sp|Q29056|IL1RA_PIG	IL1RN	P18510	20 kDa	0.3	0.4
Malignant T-cell-amplified sequence OS=Sus scrofa OX=9823 GN=LOC100738684 PE=1 SV=1	tr|A0A286ZJU5|A0A286ZJU5_PIG	MCTS1	Q9ULC4	21 kDa	0.3	4
MYB binding protein 1a OS=Sus scrofa OX=9823 GN=MYBBP1A PE=1 SV=2	tr|A0A286ZYY8|A0A286ZYY8_PIG (+1)	MYBBP1A	Q9BQG0	177 kDa	0.3	0.7
Peptidylprolyl isomerase OS=Sus scrofa OX=9823 GN=FKBP2 PE=1 SV=1	tr|A0A287AA25|A0A287AA25_PIG (+1)	FKBP2	P26885	15 kDa	0.3	0.8
GrpE protein homolog OS=Sus scrofa OX=9823 GN=GRPEL1 PE=1 SV=2	tr|A0A287AD92|A0A287AD92_PIG	GRPEL1	Q9HAV7	24 kDa	0.3	0.5
Phosphoenolpyruvate carboxykinase 2, mitochondrial OS=Sus scrofa OX=9823 GN=PCK2 PE=1 SV=1	tr|A0A287AES5|A0A287AES5_PIG	PCK2	Q16822	74 kDa	0.3	0.2
Synaptosomal-associated protein OS=Sus scrofa OX=9823 GN=SNAP23 PE=1 SV=1	tr|A0A287AHK8|A0A287AHK8_PIG (+1)	SNAP23	O00161	25 kDa	0.3	1.4
Calcyphosin isoform a OS=Sus scrofa OX=9823 GN=CAPS PE=1 SV=1	tr|A0A287AHT9|A0A287AHT9_PIG (+2)	CAPS	Q9ULU8	21 kDa	0.3	0.4
ATPase H+ transporting V1 subunit E1 OS=Sus scrofa OX=9823 GN=ATP6V1E1 PE=3 SV=2	tr|A0A287AIQ8|A0A287AIQ8_PIG	ATP6V1E1	P36543	26 kDa	0.3	0.6
Heterogeneous nuclear ribonucleoprotein L OS=Sus scrofa OX=9823 GN=HNRNPL PE=4 SV=2	tr|A0A287AJX7|A0A287AJX7_PIG	HNRNPL	P14866	50 kDa	0.3	0.7
Sorbitol dehydrogenase OS=Sus scrofa OX=9823 GN=SORD PE=3 SV=2	tr|A0A287AT21|A0A287AT21_PIG	SORD	Q00796	38 kDa	0.3	0.1
Calcium binding protein 39 OS=Sus scrofa OX=9823 GN=CAB39 PE=1 SV=1	tr|A0A287AUZ3|A0A287AUZ3_PIG	CAB39	Q9Y376	38 kDa	0.3	3.9
Dynein light intermediate chain OS=Sus scrofa OX=9823 GN=DYNC1LI2 PE=1 SV=1	tr|A0A287AVN3|A0A287AVN3_PIG (+1)	DYNC1LI2	O43237	54 kDa	0.3	0.6
Aldo_ket_red domain-containing protein OS=Sus scrofa OX=9823 GN=AKR1C1 PE=1 SV=1	tr|A0A287B0I7|A0A287B0I7_PIG	AKR1C1	Q04828	35 kDa	0.3	0.4
Aly/REF export factor OS=Sus scrofa OX=9823 GN=ALYREF PE=1 SV=1	tr|A0A287BET5|A0A287BET5_PIG	ALYREF	Q86V81	27 kDa	0.3	0.6
Small nuclear ribonucleoprotein Sm D2 OS=Sus scrofa OX=9823 GN=SNRPD2 PE=1 SV=1	tr|A0A287BQU7|A0A287BQU7_PIG	SNRPD2	P62316	14 kDa	0.3	0.7
Phosphoserine aminotransferase OS=Sus scrofa OX=9823 GN=PSAT1 PE=1 SV=1	tr|A0A5G2QUN4|A0A5G2QUN4_PIG	PSAT1	Q9Y617	40 kDa	0.3	0
Peptidylprolyl isomerase OS=Sus scrofa OX=9823 GN=FKBP4 PE=1 SV=1	tr|A0A5G2QVN7|A0A5G2QVN7_PIG	FKBP4	Q02790	51 kDa	0.3	0.7
Adenosine kinase OS=Sus scrofa OX=9823 GN=ADK PE=1 SV=1	tr|A0A5G2R0F5|A0A5G2R0F5_PIG	ADK	P55263	40 kDa	0.3	0.5
Signal sequence receptor subunit 4 OS=Sus scrofa OX=9823 GN=SSR4 PE=1 SV=1	tr|A0A5G2R7N1|A0A5G2R7N1_PIG (+1)	SSR4	P51571	25 kDa	0.3	0.6
DEAD-box helicase 3 X-linked OS=Sus scrofa OX=9823 GN=DDX3X PE=1 SV=1	tr|A0A5G2R8C2|A0A5G2R8C2_PIG (+1)	DDX3X	O00571	71 kDa	0.3	0.7
WW domain binding protein 2 OS=Sus scrofa OX=9823 GN=WBP2 PE=1 SV=1	tr|A0A5G2RCN8|A0A5G2RCN8_PIG (+1)	WBP2	Q969T9	28 kDa	0.3	0.5
Carboxylic ester hydrolase OS=Sus scrofa OX=9823 GN=CES1 PE=1 SV=3	tr|F1RF15|F1RF15_PIG	CES1	P23141	52 kDa	0.3	0.3
Actin binding LIM protein family member 3 OS=Sus scrofa OX=9823 GN=ABLIM3 PE=4 SV=3	tr|F1RLA7|F1RLA7_PIG	ABLIM3	O94929	78 kDa	0.3	3.8
1-phosphatidylinositol 4,5-bisphosphate phosphodiesterase OS=Sus scrofa OX=9823 GN=PLCB3 PE=1 SV=3	tr|F1RQ08|F1RQ08_PIG	PLCB3	Q9NQ68	139 kDa	0.3	0.6
Supervillin OS=Sus scrofa OX=9823 GN=SVIL PE=4 SV=3	tr|F1RWD9|F1RWD9_PIG	SVIL	O95425	246 kDa	0.3	0.4
Lipase maturation factor OS=Sus scrofa OX=9823 GN=LMF2 PE=1 SV=2	tr|F1RXT9|F1RXT9_PIG	LMF2	Q9BU23	85 kDa	0.3	0.5
Uncharacterized protein OS=Sus scrofa OX=9823 GN=MISP3 PE=1 SV=3	tr|F1SD56|F1SD56_PIG			48 kDa	0.3	0.5
Peroxiredoxin OS=Sus scrofa OX=9823 GN=PRDX4 PE=1 SV=1	tr|F1SQ01|F1SQ01_PIG	PRDX4	Q13162	31 kDa	0.3	0.3
Guanylate cyclase 1 soluble subunit alpha 2 OS=Sus scrofa OX=9823 GN=GUCY1A2 PE=1 SV=2	tr|I3L9I5|I3L9I5_PIG	GUCY1A2	P33402	82 kDa	0.3	0.5
Cdc42-interacting protein 4 isoform 1 OS=Sus scrofa OX=9823 GN=TRIP10 PE=1 SV=3	tr|I3LAS2|I3LAS2_PIG	TRIP10	Q15642	68 kDa	0.3	0.5
EH domain containing 2 OS=Sus scrofa OX=9823 GN=EHD2 PE=1 SV=1	tr|I3LD72|I3LD72_PIG	EHD2	Q9NZN4	61 kDa	0.3	1.3
Poly(rC) binding protein 1 OS=Sus scrofa OX=9823 GN=PCBP1 PE=1 SV=1	tr|I3LEC2|I3LEC2_PIG	PCBP1	Q15365	38 kDa	0.3	0.7
Biliverdin reductase B OS=Sus scrofa OX=9823 GN=BLVRB PE=1 SV=2	tr|I3LQH7|I3LQH7_PIG	BLVRB	P30043	22 kDa	0.3	1.2
2-oxoglutarate dehydrogenase, mitochondrial OS=Sus scrofa OX=9823 GN=OGDH PE=1 SV=1	tr|K9IVI1|K9IVI1_PIG	OGDH	Q02218	116 kDa	0.3	0.7
Sepiapterin reductase OS=Sus scrofa OX=9823 GN=SPR PE=4 SV=2	tr|A0A286ZKH3|A0A286ZKH3_PIG	SPR	P35270	28 kDa	0.31	0.8
UPF1 RNA helicase and ATPase OS=Sus scrofa OX=9823 GN=UPF1 PE=1 SV=2	tr|A0A286ZYJ8|A0A286ZYJ8_PIG	UPF1	Q92900	124 kDa	0.31	0.7
Calcium/calmodulin dependent protein kinase I OS=Sus scrofa OX=9823 GN=CAMK1 PE=1 SV=2	tr|A0A287AZS7|A0A287AZS7_PIG (+1)	CAMK1	Q14012	42 kDa	0.31	0.3
Uncharacterized protein OS=Sus scrofa OX=9823 GN=ARHGDIB PE=1 SV=1	tr|A0A287B0I3|A0A287B0I3_PIG			23 kDa	0.31	0.7
Synaptotagmin binding cytoplasmic RNA interacting protein OS=Sus scrofa OX=9823 GN=SYNCRIP PE=1 SV=1	tr|A0A287BGU5|A0A287BGU5_PIG	SYNCRIP	O60506	63 kDa	0.31	0.7
Peptidase_M28 domain-containing protein OS=Sus scrofa OX=9823 GN=CPQ PE=1 SV=1	tr|A0A287BIP6|A0A287BIP6_PIG (+1)	CPQ	Q9Y646	57 kDa	0.31	2.2
14-3-3 protein zeta/delta OS=Sus scrofa OX=9823 GN=YWHAZ PE=1 SV=1	tr|A0A480PLY3|A0A480PLY3_PIG	YWHAZ	P63104	28 kDa	0.31	1.3
Integrin subunit alpha 2 OS=Sus scrofa OX=9823 GN=ITGA2 PE=1 SV=1	tr|A0A5G2QAT5|A0A5G2QAT5_PIG (+1)	ITGA2	P17301	127 kDa	0.31	0.4
Tensin 1 OS=Sus scrofa OX=9823 GN=TNS1 PE=1 SV=1	tr|A0A5G2QNI3|A0A5G2QNI3_PIG	TNS1	Q9HBL0	200 kDa	0.31	0.7
ATP binding cassette subfamily E member 1 OS=Sus scrofa OX=9823 GN=ABCE1 PE=4 SV=4	tr|F1RS49|F1RS49_PIG	ABCE1	P61221	63 kDa	0.31	0.7
SERPIN domain-containing protein OS=Sus scrofa OX=9823 GN=LOC106504545 PE=1 SV=2	tr|F1SCC9|F1SCC9_PIG		Not present in human	46 kDa	0.31	1.4
Cytochrome P450 1A2 OS=Sus scrofa OX=9823 GN=CYP1A2 PE=1 SV=1	tr|F1SJ26|F1SJ26_PIG	CYP1A2	P05177	58 kDa	0.31	0
Ribosomal protein S11 OS=Sus scrofa OX=9823 GN=RPS11 PE=1 SV=1	tr|F2Z4Y8|F2Z4Y8_PIG	RPS11	P62280	18 kDa	0.31	0.6
Late endosomal/lysosomal adaptor, MAPK and MTOR activator 3 OS=Sus scrofa OX=9823 GN=LAMTOR3 PE=1 SV=1	tr|F2Z5B8|F2Z5B8_PIG	LAMTOR3	Q9UHA4	14 kDa	0.31	0.5
Uncharacterized protein OS=Sus scrofa OX=9823 GN=RBM3 PE=4 SV=2	tr|I3L5X7|I3L5X7_PIG			17 kDa	0.31	0.5
Galectin OS=Sus scrofa OX=9823 GN=LGALSL PE=1 SV=1	tr|I3L8J2|I3L8J2_PIG	LGALSL	Q3ZCW2	19 kDa	0.31	0.5
PITH domain containing 1 OS=Sus scrofa OX=9823 GN=PITHD1 PE=1 SV=2	tr|I3L9H4|I3L9H4_PIG	PITHD1	Q9GZP4	24 kDa	0.31	2.2
Methionyl-tRNA synthetase OS=Sus scrofa OX=9823 GN=MARS1 PE=3 SV=2	tr|I3LA63|I3LA63_PIG (+1)	MARS1	P56192	107 kDa	0.31	3.9
Coatomer subunit delta OS=Sus scrofa OX=9823 GN=ARCN1 PE=1 SV=3	tr|I3LBY0|I3LBY0_PIG	ARCN1	P48444	57 kDa	0.31	0.7
Enolase 2 OS=Sus scrofa OX=9823 GN=ENO2 PE=3 SV=2	tr|I3LCN1|I3LCN1_PIG	ENO2	P09104	47 kDa	0.31	0.4
Hydroxysteroid 17-beta dehydrogenase 4 OS=Sus scrofa OX=9823 GN=HSD17B4 PE=1 SV=2	tr|I3LEF8|I3LEF8_PIG	HSD17B4	P51659	80 kDa	0.31	0.3
Eukaryotic translation elongation factor 2 OS=Sus scrofa OX=9823 GN=EEF2 PE=1 SV=3	tr|I3LII3|I3LII3_PIG	EEF2	P13639	96 kDa	0.31	0.9
D-3-phosphoglycerate dehydrogenase OS=Sus scrofa OX=9823 GN=PHGDH PE=3 SV=1	sp|A5GFY8|SERA_PIG	PHGDH	O43175	57 kDa	0.32	0.3
Rho-associated protein kinase 2 OS=Sus scrofa OX=9823 GN=ROCK2 PE=1 SV=1	sp|M3TYT0|ROCK2_PIG	ROCK2	O75116	161 kDa	0.32	0.6
Platelet factor 4 OS=Sus scrofa OX=9823 GN=PF4 PE=1 SV=2	sp|P30034|PLF4_PIG (+1)	PF4	P02776	10 kDa	0.32	0.5
Liver carboxylesterase OS=Sus scrofa OX=9823 PE=1 SV=1	sp|Q29550|EST1_PIG	CES1	P23141	62 kDa	0.32	0.2
Protein quaking OS=Sus scrofa OX=9823 GN=QKI PE=2 SV=1	sp|Q5W9D5|QKI_PIG (+2)	QKI	Q96PU8	38 kDa	0.32	0.3
Solute carrier family 25 member 4 OS=Sus scrofa OX=9823 GN=SLC25A4 PE=1 SV=1	tr|A0A286ZIE8|A0A286ZIE8_PIG	SLC25A4	P12235	33 kDa	0.32	0.8
Heterogeneous nuclear ribonucleoprotein D like OS=Sus scrofa OX=9823 GN=HNRNPDL PE=1 SV=2	tr|A0A286ZYE7|A0A286ZYE7_PIG	HNRNPDL	O14979	46 kDa	0.32	1.2
Enoyl-CoA hydratase and 3-hydroxyacyl CoA dehydrogenase OS=Sus scrofa OX=9823 GN=EHHADH PE=4 SV=2	tr|A0A287ACP9|A0A287ACP9_PIG	EHHADH	Q08426	74 kDa	0.32	0.1
Cordon-bleu WH2 repeat protein like 1 OS=Sus scrofa OX=9823 GN=COBLL1 PE=4 SV=2	tr|A0A287ADV3|A0A287ADV3_PIG (+1)	COBLL1	Q53SF7	132 kDa	0.32	0.6
Heat shock protein family B (small) member 6 OS=Sus scrofa OX=9823 GN=HSPB6 PE=1 SV=1	tr|A0A287AQR8|A0A287AQR8_PIG	HSPB6	O14558	17 kDa	0.32	0.6
Laminin subunit beta-2 OS=Sus scrofa OX=9823 GN=LAMB2 PE=1 SV=1	tr|A0A287AWV5|A0A287AWV5_PIG	LAMB2	P55268	205 kDa	0.32	0.6
Solute carrier family 27 member 5 OS=Sus scrofa OX=9823 GN=SLC27A5 PE=1 SV=2	tr|A0A287BDD8|A0A287BDD8_PIG	SLC27A5	Q9Y2P5	78 kDa	0.32	0
Adducin 3 OS=Sus scrofa OX=9823 GN=ADD3 PE=1 SV=1	tr|A0A287BSU1|A0A287BSU1_PIG	ADD3	Q9UEY8	75 kDa	0.32	0.6
Phospholysine phosphohistidine inorganic pyrophosphate phosphatase OS=Sus scrofa OX=9823 GN=LHPP PE=1 SV=1	tr|A0A480STU2|A0A480STU2_PIG	LHPP	Q9H008	29 kDa	0.32	0.6
3-ketoacyl-CoA thiolase, peroxisomal isoform X1 OS=Sus scrofa OX=9823 GN=ACAA1 PE=1 SV=1	tr|A0A480UJ69|A0A480UJ69_PIG	ACAA1	P09110	45 kDa	0.32	0.2
Thioredoxin domain containing 12 OS=Sus scrofa OX=9823 GN=TXNDC12 PE=1 SV=1	tr|A0A481A893|A0A481A893_PIG	TXNDC12	O95881	19 kDa	0.32	0.6
Methyl-CpG-binding protein 2 OS=Sus scrofa OX=9823 GN=MECP2 PE=1 SV=1	tr|A0A5G2QE26|A0A5G2QE26_PIG	MECP2	P51608	52 kDa	0.32	0.6
Transcription elongation factor SPT5 OS=Sus scrofa OX=9823 GN=SUPT5H PE=1 SV=1	tr|A0A5G2QYQ2|A0A5G2QYQ2_PIG (+1)	SUPT5H	O00267	120 kDa	0.32	0.4
Na(+)/H(+) exchange regulatory cofactor NHE-RF OS=Sus scrofa OX=9823 GN=SLC9A3R1 PE=1 SV=1	tr|B8XH67|B8XH67_PIG	SLC9A3R1	O14745	39 kDa	0.32	0.7
3-ketoacyl-CoA thiolase, mitochondrial OS=Sus scrofa OX=9823 GN=ACAA2 PE=1 SV=1	tr|D0G0B3|D0G0B3_PIG	ACAA2	P42765	42 kDa	0.32	0.2
Alpha-actinin-2 isoform 1 OS=Sus scrofa OX=9823 GN=ACTN2 PE=1 SV=1	tr|F1RHL9|F1RHL9_PIG	ACTN2	P35609	104 kDa	0.32	1.1
Argininosuccinate lyase isoform 1 OS=Sus scrofa OX=9823 GN=ASL PE=1 SV=1	tr|F1RJH8|F1RJH8_PIG	ASL	P04424	52 kDa	0.32	0.08
Elongation factor 1-gamma OS=Sus scrofa OX=9823 GN=EEF1G PE=4 SV=3	tr|F1RPW9|F1RPW9_PIG	EEF1G	P26641	50 kDa	0.32	0.8
Serine/threonine kinase 10 OS=Sus scrofa OX=9823 GN=STK10 PE=4 SV=3	tr|F1RRZ3|F1RRZ3_PIG	STK10	O94804	109 kDa	0.32	0.6
Pyridoxal phosphate homeostasis protein OS=Sus scrofa OX=9823 GN=PLPBP PE=1 SV=1	tr|F1RX84|F1RX84_PIG	PLPBP	O94903	30 kDa	0.32	0.6
NADH dehydrogenase ubiquinone iron-sulfur protein 2, mitochondrial isoform 1 OS=Sus scrofa OX=9823 GN=NDUFS2 PE=1 SV=2	tr|F1S1A8|F1S1A8_PIG	NDUFS2	O75306	54 kDa	0.32	0.6
Cartilage oligomeric matrix protein OS=Sus scrofa OX=9823 GN=COMP PE=1 SV=2	tr|F1S902|F1S902_PIG	COMP	P49747	82 kDa	0.32	0
KN motif and ankyrin repeat domains 3 OS=Sus scrofa OX=9823 GN=KANK3 PE=1 SV=1	tr|F1SA52|F1SA52_PIG	KANK3	Q6NY19	85 kDa	0.32	0.6
Splicing factor 3b subunit 4 OS=Sus scrofa OX=9823 GN=SF3B4 PE=1 SV=1	tr|F1SDG0|F1SDG0_PIG	SF3B4	Q15427	44 kDa	0.32	0.5
Abraxas 2, BRISC complex subunit OS=Sus scrofa OX=9823 GN=ABRAXAS2 PE=1 SV=2	tr|F1SDP0|F1SDP0_PIG	ABRAXAS2	Q15018	49 kDa	0.32	3.5
Rho GTPase activating protein 25 OS=Sus scrofa OX=9823 GN=ARHGAP25 PE=4 SV=3	tr|F1SPM2|F1SPM2_PIG	ARHGAP25	P42331	73 kDa	0.32	0.6
Phosphatidylinositol binding clathrin assembly protein OS=Sus scrofa OX=9823 GN=PICALM PE=1 SV=4	tr|F1STS9|F1STS9_PIG	PICALM	Q13492	76 kDa	0.32	0.7
Integrin subunit alpha L OS=Sus scrofa OX=9823 GN=ITGAL PE=1 SV=1	tr|F6PS48|F6PS48_PIG	ITGAL	P20701	136 kDa	0.32	0.6
VPS35 endosomal protein sorting factor like OS=Sus scrofa OX=9823 GN=VPS35L PE=1 SV=2	tr|I3LH24|I3LH24_PIG	VPS35L	Q7Z3J2	125 kDa	0.32	2.8
Superoxide dismutase [Cu-Zn] OS=Sus scrofa OX=9823 GN=SOD3 PE=3 SV=2	tr|I3LUD1|I3LUD1_PIG	SOD3	P08294	32 kDa	0.32	1.3
Heat shock 70 kDa protein 1B OS=Sus scrofa OX=9823 GN=HSPA1B PE=2 SV=1	sp|Q6S4N2|HS71B_PIG (+1)	HSPA1B	P0DMV9	70 kDa	0.33	0.9
Arginase-1 OS=Sus scrofa OX=9823 GN=ARG1 PE=2 SV=1	sp|Q95JC8|ARGI1_PIG	ARG1	P05089	35 kDa	0.33	0.03
60S ribosomal protein L7a OS=Sus scrofa OX=9823 GN=RPL7A PE=3 SV=1	tr|A0A286ZQA5|A0A286ZQA5_PIG	RPL7A	P18124	34 kDa	0.33	0.7
Agrin OS=Sus scrofa OX=9823 GN=AGRN PE=1 SV=1	tr|A0A286ZS39|A0A286ZS39_PIG	AGRN	O00468	223 kDa	0.33	0.7
RCSD domain containing 1 OS=Sus scrofa OX=9823 GN=RCSD1 PE=1 SV=1	tr|A0A286ZSH0|A0A286ZSH0_PIG	RCSD1	Q6JBY9	50 kDa	0.33	0.5
Fructose-bisphosphate aldolase OS=Sus scrofa OX=9823 GN=ALDOB PE=1 SV=1	tr|A0A286ZTA4|A0A286ZTA4_PIG	ALDOB	P05062	40 kDa	0.33	0.3
Tyrosine-protein phosphatase non-receptor type OS=Sus scrofa OX=9823 GN=PTPN6 PE=3 SV=2	tr|A0A286ZXH2|A0A286ZXH2_PIG (+3)	PTPN6	P29350	69 kDa	0.33	0.7
KH-type splicing regulatory protein OS=Sus scrofa OX=9823 GN=KHSRP PE=1 SV=1	tr|A0A286ZY30|A0A286ZY30_PIG	KHSRP	Q92945	73 kDa	0.33	0.7
C-terminal binding protein 1 OS=Sus scrofa OX=9823 GN=CTBP1 PE=3 SV=2	tr|A0A287A5I0|A0A287A5I0_PIG (+1)	CTBP1	Q13363	46 kDa	0.33	0.7
Exocyst complex component 8 OS=Sus scrofa OX=9823 GN=EXOC8 PE=1 SV=1	tr|A0A287AA07|A0A287AA07_PIG	EXOC8	Q8IYI6	82 kDa	0.33	0.3
Methionine adenosyltransferase 2 subunit beta OS=Sus scrofa OX=9823 GN=MAT2B PE=1 SV=1	tr|A0A287AEU6|A0A287AEU6_PIG	MAT2B	Q9NZL9	37 kDa	0.33	0.7
ATP synthase subunit alpha OS=Sus scrofa OX=9823 GN=ATP5F1A PE=1 SV=1	tr|A0A287AGU2|A0A287AGU2_PIG	ATP5F1A	P25705	59 kDa	0.33	0.9
Constitutive coactivator of PPAR-gamma-like protein 1 isoform b OS=Sus scrofa OX=9823 GN=FAM120A PE=1 SV=1	tr|A0A287AI94|A0A287AI94_PIG (+1)	FAM120A	Q9NZB2	127 kDa	0.33	0.7
Microtubule actin crosslinking factor 1 OS=Sus scrofa OX=9823 GN=MACF1 PE=1 SV=1	tr|A0A287ALB5|A0A287ALB5_PIG	MACF1	Q9UPN3	21 kDa	0.33	2.3
Succinate-semialdehyde dehydrogenase OS=Sus scrofa OX=9823 GN=ALDH5A1 PE=3 SV=2	tr|A0A287AR05|A0A287AR05_PIG	ALDH5A1	P51649	57 kDa	0.33	0.2
Succinate--CoA ligase [ADP-forming] subunit beta, mitochondrial OS=Sus scrofa OX=9823 GN=SUCLA2 PE=1 SV=1	tr|A0A287AR48|A0A287AR48_PIG	SUCLA2	Q9P2R7	50 kDa	0.33	0.4
Vitamin K epoxide reductase complex subunit 1 OS=Sus scrofa OX=9823 GN=VKORC1 PE=1 SV=1	tr|A0A287B0I6|A0A287B0I6_PIG	VKORC1	Q9BQB6	18 kDa	0.33	0.7
ATP synthase-coupling factor 6, mitochondrial OS=Sus scrofa OX=9823 GN=ATP5PF PE=3 SV=2	tr|A0A287B441|A0A287B441_PIG	ATP5PF	P18859	13 kDa	0.33	0.3
Uncharacterized protein OS=Sus scrofa OX=9823 PE=1 SV=2	tr|A0A287B626|A0A287B626_PIG			44 kDa	0.33	1.4
GTPase KRas isoform X2 OS=Sus scrofa OX=9823 GN=KRAS PE=1 SV=2	tr|A0A287B854|A0A287B854_PIG	KRAS	P01116	21 kDa	0.33	0.7
Junctional cadherin 5 associated OS=Sus scrofa OX=9823 GN=JCAD PE=1 SV=2	tr|A0A287BCR9|A0A287BCR9_PIG (+1)	JCAD	Q9P266	142 kDa	0.33	0.6
SON DNA binding protein OS=Sus scrofa OX=9823 GN=SON PE=1 SV=2	tr|A0A287BK71|A0A287BK71_PIG	SON	P18583	265 kDa	0.33	3.5
G protein pathway suppressor 1 OS=Sus scrofa OX=9823 GN=GPS1 PE=4 SV=2	tr|A0A287BSE8|A0A287BSE8_PIG	GPS1	Q13098	59 kDa	0.33	0.3
Eukaryotic translation initiation factor 4H isoform 2 OS=Sus scrofa OX=9823 GN=EIF4H PE=1 SV=1	tr|A0A480PPD4|A0A480PPD4_PIG	EIF4H	Q15056	25 kDa	0.33	0.7
26S proteasome non-ATPase regulatory subunit 5 isoform 1 OS=Sus scrofa OX=9823 GN=PSMD5 PE=1 SV=1	tr|A0A480QIP5|A0A480QIP5_PIG	PSMD5	Q16401	56 kDa	0.33	0.8
SAC1 like phosphatidylinositide phosphatase OS=Sus scrofa OX=9823 GN=SACM1L PE=1 SV=1	tr|A0A5G2Q9B0|A0A5G2Q9B0_PIG (+1)	SACM1L	Q9NTJ5	68 kDa	0.33	1.5
Beta-ureidopropionase OS=Sus scrofa OX=9823 GN=UPB1 PE=1 SV=1	tr|A0A5G2R361|A0A5G2R361_PIG	UPB1	Q9UBR1	43 kDa	0.33	0.1
SH3 domain containing GRB2 like, endophilin B2 OS=Sus scrofa OX=9823 GN=SH3GLB2 PE=1 SV=1	tr|A0A5G2R5C7|A0A5G2R5C7_PIG	SH3GLB2	Q9NR46	44 kDa	0.33	0.7
SH3 domain binding glutamate rich protein like 2 OS=Sus scrofa OX=9823 GN=SH3BGRL2 PE=1 SV=1	tr|A0A5G2R9U8|A0A5G2R9U8_PIG	SH3BGRL2	Q9UJC5	14 kDa	0.33	0.6
Ubiquitin associated protein 2 like OS=Sus scrofa OX=9823 GN=UBAP2L PE=1 SV=1	tr|A0A5G2RFH0|A0A5G2RFH0_PIG	UBAP2L	Q14157	121 kDa	0.33	0.6
Marginal zone B-and B1-cell-specific protein OS=Sus scrofa OX=9823 GN=MZB1 PE=1 SV=2	tr|F1RGG8|F1RGG8_PIG	MZB1	Q8WU39	22 kDa	0.33	0.4
Mesoderm development LRP chaperone OS=Sus scrofa OX=9823 GN=MESD PE=1 SV=1	tr|F1RIE0|F1RIE0_PIG	MESD	Q14696	26 kDa	0.33	0.5
DnaJ heat shock protein family (Hsp40) member A2 OS=Sus scrofa OX=9823 GN=DNAJA2 PE=1 SV=1	tr|F1RP05|F1RP05_PIG	DNAJA2	O60884	46 kDa	0.33	0.6
Bridging integrator 1 OS=Sus scrofa OX=9823 GN=BIN1 PE=1 SV=3	tr|F1RXZ6|F1RXZ6_PIG	BIN1	O00499	50 kDa	0.33	0.6
1-phosphatidylinositol 4,5-bisphosphate phosphodiesterase gamma OS=Sus scrofa OX=9823 GN=PLCG2 PE=4 SV=3	tr|F1S475|F1S475_PIG	PLCG2	P19174	148 kDa	0.33	0.6
Myosin IG OS=Sus scrofa OX=9823 GN=MYO1G PE=1 SV=4	tr|F1ST46|F1ST46_PIG	MYO1G	B0I1T2	105 kDa	0.33	0.6
Aldehyde dehydrogenase 1 family member B1 OS=Sus scrofa OX=9823 GN=ALDH1B1 PE=1 SV=1	tr|F1ST54|F1ST54_PIG	ALDH1B1	P15121	57 kDa	0.33	0.4
Family with sequence similarity 49 member A OS=Sus scrofa OX=9823 GN=CYRIA PE=1 SV=1	tr|F2Z5E7|F2Z5E7_PIG	CYRIA	Q9H0Q0	37 kDa	0.33	0.6
26S protease regulatory subunit 4 OS=Sus scrofa OX=9823 GN=PSMC1 PE=1 SV=1	tr|F2Z5J1|F2Z5J1_PIG	PSMC1	P62191	49 kDa	0.33	0.7
Pleckstrin homology like domain family B member 1 OS=Sus scrofa OX=9823 GN=PHLDB1 PE=4 SV=3	tr|I3LI25|I3LI25_PIG	PHLDB1	Q86UU1	171 kDa	0.33	0.5
Integrin beta OS=Sus scrofa OX=9823 GN=ITGB1 PE=3 SV=2	tr|K7GS94|K7GS94_PIG	ITGB1	P05556	94 kDa	0.33	1.3
SLA class II histocompatibility antigen, DQ haplotype D alpha chain OS=Sus scrofa OX=9823 PE=2 SV=1	sp|P15981|HA2D_PIG (+1)		Not present in human	28 kDa	0.34	0.7
NADH-cytochrome b5 reductase 3 (Fragment) OS=Sus scrofa OX=9823 GN=CYB5R3 PE=1 SV=1	sp|P83686|NB5R3_PIG	CYB5R3	P00387	31 kDa	0.34	0.8
ADP-ribosylation factor 6 OS=Sus scrofa OX=9823 GN=ARF6 PE=2 SV=1	sp|Q007T5|ARF6_PIG	ARF6	P62330	20 kDa	0.34	0.6
NDRG family member 2 OS=Sus scrofa OX=9823 GN=NDRG2 PE=4 SV=2	tr|A0A286ZIM7|A0A286ZIM7_PIG	NDRG2	Q9UN36	39 kDa	0.34	0.6
Malic enzyme OS=Sus scrofa OX=9823 GN=ME2 PE=1 SV=1	tr|A0A286ZNS2|A0A286ZNS2_PIG	ME2	P23368	76 kDa	0.34	0.6
Acyl-coenzyme A oxidase OS=Sus scrofa OX=9823 GN=ACOX1 PE=1 SV=2	tr|A0A286ZSR3|A0A286ZSR3_PIG	ACOX1	Q15067	74 kDa	0.34	0.3
WD_REPEATS_REGION domain-containing protein OS=Sus scrofa OX=9823 GN=DYNC1I2 PE=1 SV=2	tr|A0A286ZTA9|A0A286ZTA9_PIG (+2)		Not present in human	65 kDa	0.34	0.6
CRK proto-oncogene, adaptor protein OS=Sus scrofa OX=9823 GN=CRK PE=1 SV=2	tr|A0A286ZTD8|A0A286ZTD8_PIG	CRK	P46108	42 kDa	0.34	0.7
Calcium voltage-gated channel auxiliary subunit alpha2delta 1 OS=Sus scrofa OX=9823 GN=CACNA2D1 PE=1 SV=2	tr|A0A286ZV56|A0A286ZV56_PIG (+2)	CACNA2D1	P54289	120 kDa	0.34	0.6
10-formyltetrahydrofolate dehydrogenase OS=Sus scrofa OX=9823 GN=ALDH1L1 PE=1 SV=1	tr|A0A286ZYU8|A0A286ZYU8_PIG	ALDH1L1	O75891	95 kDa	0.34	0.03
Spectrin beta chain OS=Sus scrofa OX=9823 GN=SPTB PE=1 SV=1	tr|A0A287A113|A0A287A113_PIG	SPTB	P11277	270 kDa	0.34	1.5
Uncharacterized protein OS=Sus scrofa OX=9823 GN=AHNAK PE=1 SV=2	tr|A0A287A608|A0A287A608_PIG			236 kDa	0.34	1.3
Nucleosome assembly protein 1 like 4 OS=Sus scrofa OX=9823 GN=NAP1L4 PE=1 SV=2	tr|A0A287AEQ6|A0A287AEQ6_PIG	NAP1L4	Q99733	44 kDa	0.34	0.7
Dolichyl-diphosphooligosaccharide--protein glycosyltransferase 48 kDa subunit OS=Sus scrofa OX=9823 GN=DDOST PE=1 SV=1	tr|A0A287AGM8|A0A287AGM8_PIG	DDOST	P39656	49 kDa	0.34	0.7
ADP-ribosylation factor-binding protein GGA1 isoform 1 OS=Sus scrofa OX=9823 GN=GGA1 PE=1 SV=1	tr|A0A287AJM0|A0A287AJM0_PIG	GGA1	Q9UJY5	70 kDa	0.34	0.5
Inositol-1-monophosphatase OS=Sus scrofa OX=9823 GN=IMPA1 PE=3 SV=1	tr|A0A287AVN0|A0A287AVN0_PIG	IMPA1	P29218	30 kDa	0.34	0.7
Amylo-alpha-1, 6-glucosidase, 4-alpha-glucanotransferase OS=Sus scrofa OX=9823 GN=AGL PE=4 SV=2	tr|A0A287AXA8|A0A287AXA8_PIG	AGL	P35573	175 kDa	0.34	0.1
Epidermal growth factor receptor pathway substrate 15 like 1 OS=Sus scrofa OX=9823 GN=EPS15L1 PE=1 SV=2	tr|A0A287B5N2|A0A287B5N2_PIG	EPS15L1	Q9UBC2	103 kDa	0.34	0.6
Carbonyl reductase [NADPH] 2 OS=Sus scrofa OX=9823 GN=CBR2 PE=4 SV=1	tr|A0A287BT95|A0A287BT95_PIG	CBR2	Q8NA72	26 kDa	0.34	1.3
Medium-chain-specific acyl-CoA dehydrogenase, mitochondrial OS=Sus scrofa OX=9823 GN=ACADM PE=3 SV=2	tr|A0A2C9F350|A0A2C9F350_PIG	ACADM	P11310	46 kDa	0.34	0.3
Nidogen 1 OS=Sus scrofa OX=9823 GN=NID1 PE=4 SV=4	tr|F1RGY5|F1RGY5_PIG	NID1	P14543	143 kDa	0.34	0.6
Fibrinogen alpha chain OS=Sus scrofa OX=9823 GN=FGA PE=1 SV=4	tr|F1RX36|F1RX36_PIG	FGA	P02671	101 kDa	0.34	0.7
C-terminal binding protein 2 OS=Sus scrofa OX=9823 GN=CTBP2 PE=1 SV=3	tr|F1SDN6|F1SDN6_PIG	CTBP2	P56545	105 kDa	0.34	4
Glyoxylate and hydroxypyruvate reductase OS=Sus scrofa OX=9823 GN=GRHPR PE=1 SV=3	tr|F1ST73|F1ST73_PIG	GRHPR	Q9UBQ7	36 kDa	0.34	0.4
High mobility group protein B1 OS=Sus scrofa OX=9823 GN=HMGB1 PE=4 SV=3	tr|F2Z594|F2Z594_PIG	HMGB1	P09429	25 kDa	0.34	1.3
Proteasome subunit alpha type OS=Sus scrofa OX=9823 GN=PSMA6 PE=1 SV=1	tr|F2Z5N0|F2Z5N0_PIG	PSMA6	P60900	27 kDa	0.34	0.7
Rho GTPase activating protein 45 OS=Sus scrofa OX=9823 GN=ARHGAP45 PE=4 SV=3	tr|I3LCC0|I3LCC0_PIG	ARHGAP45	Q92619	127 kDa	0.34	0.5
ATP binding cassette subfamily D member 3 OS=Sus scrofa OX=9823 GN=ABCD3 PE=1 SV=2	tr|I3LI20|I3LI20_PIG	ABCD3	P28288	75 kDa	0.34	0.2
Sulfotransferase OS=Sus scrofa OX=9823 GN=SULT1A3 PE=1 SV=3	tr|I3LLX8|I3LLX8_PIG	SULT1A3	P0DMM9	33 kDa	0.34	0.7
Trifunctional purine biosynthetic protein adenosine-3 OS=Sus scrofa OX=9823 GN=GART PE=1 SV=3	tr|I3LP37|I3LP37_PIG	GART	P22102	108 kDa	0.34	0.6
RNA binding motif protein X-linked OS=Sus scrofa OX=9823 GN=RBMX PE=1 SV=2	tr|K7GNV0|K7GNV0_PIG	RBMX	P38159	44 kDa	0.34	0.8
Mannosyl-oligosaccharide glucosidase OS=Sus scrofa OX=9823 GN=MOGS PE=1 SV=1	tr|K7N7E7|K7N7E7_PIG	MOGS	Q13724	93 kDa	0.34	0.7
Cystatin C OS=Sus scrofa OX=9823 GN=CST3 PE=1 SV=1	tr|Q0Z8R0|Q0Z8R0_PIG	CST3	P01034	16 kDa	0.34	0.6
MICOS complex subunit MIC13 OS=Sus scrofa OX=9823 GN=MICOS13 PE=3 SV=1	sp|A1XQR7|MIC13_PIG (+1)	MICOS13	Q5XKP0	13 kDa	0.35	INF
Selenide, water dikinase 2 OS=Sus scrofa OX=9823 GN=SEPHS2 PE=2 SV=2	sp|A1YIZ1|SPS2_PIG	SEPHS2	Q99611	48 kDa	0.35	0
Signal peptidase complex subunit 1 OS=Sus scrofa OX=9823 GN=SPCS1 PE=3 SV=1	sp|B0FWK4|SPCS1_PIG	SPCS1	Q9Y6A9	12 kDa	0.35	0
LIM domain and actin-binding protein 1 OS=Sus scrofa OX=9823 GN=LIMA1 PE=2 SV=1	sp|B0KYV5|LIMA1_PIG	LIMA1	Q9UHB6	84 kDa	0.35	0
Hydroxymethylglutaryl-CoA synthase, mitochondrial OS=Sus scrofa OX=9823 GN=HMGCS2 PE=2 SV=1	sp|O02734|HMCS2_PIG	HMGCS2	HMGCS2	57 kDa	0.35	0
Interleukin-18 OS=Sus scrofa OX=9823 GN=IL18 PE=2 SV=2	sp|O19073|IL18_PIG (+2)	IL18	Q14116	22 kDa	0.35	INF
Lanosterol 14-alpha demethylase OS=Sus scrofa OX=9823 GN=CYP51A1 PE=2 SV=1	sp|O46420|CP51A_PIG	CYP51A1	Q16850	57 kDa	0.35	0
Solute carrier family 2, facilitated glucose transporter member 2 OS=Sus scrofa OX=9823 GN=SLC2A2 PE=2 SV=2	sp|O62786|GTR2_PIG (+3)	SLC2A2	P11168	57 kDa	0.35	0
Tripartite motif-containing protein 26 OS=Sus scrofa OX=9823 GN=TRIM26 PE=3 SV=2	sp|O77666|TRI26_PIG	TRIM26	Q12899	63 kDa	0.35	0
Adrenodoxin, mitochondrial OS=Sus scrofa OX=9823 GN=FDX1 PE=1 SV=2	sp|P00258|ADX_PIG	FDX1	P10109	20 kDa	0.35	0
Hemoglobin subunit epsilon OS=Sus scrofa OX=9823 GN=HBE1 PE=1 SV=3	sp|P02101|HBE_PIG	HBE1	P02100	16 kDa	0.35	INF
Lysozyme C-1 OS=Sus scrofa OX=9823 PE=1 SV=1	sp|P12067|LYSC1_PIG		Not present in human	15 kDa	0.35	0
SLA class II histocompatibility antigen, DQ haplotype C beta chain OS=Sus scrofa OX=9823 PE=2 SV=1	sp|P15982|HB2C_PIG		Not present in human	30 kDa	0.35	INF
High mobility group protein B2 OS=Sus scrofa OX=9823 GN=HMGB2 PE=1 SV=2	sp|P17741|HMGB2_PIG	HMGB2	P26583	24 kDa	0.35	1.6
Sodium/hydrogen exchanger 1 OS=Sus scrofa OX=9823 GN=SLC9A1 PE=2 SV=1	sp|P48762|SL9A1_PIG (+1)	SLC9A1	P19634	91 kDa	0.35	0
Glutathione S-transferase alpha M14 OS=Sus scrofa OX=9823 PE=2 SV=2	sp|P51781|GSTA1_PIG		Not present in human	25 kDa	0.35	0.03
[truncated: 3,224 more rows]

## Sheet: ALAM_MS1211_liverVPA vs liver 
Identified Proteins (4480)	Accession Number	Accession number human	Molecular Weight	T-Test (p-value): (p < 0.05)	Fold Change by Category
[truncated: 4,419 more rows]
